# Supplementary material for: Nutritional gradients orchestrate spatiotemporal microbial assembly and adaptive evolution in the neonatal mammalian gut
Source: Research Square preprint supplement (doi:10.21203/rs.3.rs-7903532/v1), 2026-02-04
Supplement: Supplementary file 1 [file 05ef81f1feb6bb647e3dcbec.xlsx]

## Sheet: Supplementary Table S6
List of primers used for validating enzymatic activity before and after point mutation
Primer	Sequence（5’→3’）	Note
pUC19-F	AGCTGTTTCCTGTGTGAAAT	pUC19 linearization
pUC19-R	TTAAGCCAGCCCCGAC
lacZ-F	ATTTCACACAGGAAACAGCTATGACCATGATTACGGATTCACTG	lacZ
lacZ-R	GTCGGGGCTGGCTTAATTATTTTTGACACCAGACCAACTGG
bglB-F	TTCAATCGAAAAACTAAAAAAAG	bglB
bglB-R	TCAATATGTGAATTTTACTGTC
pUC19-recombinant -F	TCCTGCGTTATCCCCTGATTCTG	Identification of recombinant plasmids
lacZ*-F	ATTGGCCTGAACTGCCAGCTGGCGCAGGTCGCAGAGCGG	lacZ point mutations
lacZ*-R	AGCTGGCAGTTCAGGCCAATCCGTGCCGGATGCGGTG
bglB*-R	TGTCTTGGCATCATCAAGAAAAACAGGCATGCCGTT	bglB point mutations
bglB*-F	CTTGATGATGCCAAGACAATAGATGAGAGGGTAGAAG
* for mutation
