# Supplementary material for: Nutritional gradients orchestrate spatiotemporal microbial assembly and adaptive evolution in the neonatal mammalian gut
Source: Research Square preprint supplement (doi:10.21203/rs.3.rs-7903532/v1), 2026-02-04
Supplement: Supplementary file 2 [file 289bd58357b43c07390efe7a.xlsx]

## Sheet: Supplementary table S4
Quality and taxonomic information of representative sequences from ACGG
ID	Completeness	Contamination	Gemome Size	Scaffolds	N50	Kingdom	Phylum	Class	Order	Family	Genus	Species
Cow_SGB_0001	97.39	0.65	1711791	1630	336021	Archaea	Halobacteriota	Methanomicrobia	Methanomicrobiales	Methanomicrobiaceae	Methanomicrobium	Methanomicrobium mobile
Cow_SGB_0002	92.39	1.66	1259861	1428	12112	Archaea	Halobacteriota	Methanomicrobia	Methanomicrobiales	Methanocorpusculaceae	Methanocorpusculum	Methanocorpusculum sp017555685
Cow_SGB_0003	95.1	0	1448604	1612	73282	Archaea	Halobacteriota	Methanomicrobia	Methanomicrobiales	Methanocorpusculaceae	Methanocorpusculum	Methanocorpusculum sp017387505
Cow_SGB_0004	73.19	0.5	617316	637	10759	Bacteria	Actinomycetota	Actinomycetia	Actinomycetales	Bifidobacteriaceae	RGIG1476	RGIG1476 sp017965665
Cow_SGB_0005	69.86	7.58	670190	637	38954	Bacteria	Actinomycetota	Actinomycetia	Actinomycetales	Bifidobacteriaceae	RGIG1476	RGIG1476 sp017632855
Cow_SGB_0006	77.25	2.58	823502	885	7056	Bacteria	Actinomycetota	Actinomycetia	Actinomycetales	Bifidobacteriaceae	RGIG1476	RGIG1476 sp017632945
Cow_SGB_0007	98.33	0	1471337	1176	317757	Bacteria	Actinomycetota	Actinomycetia	Actinomycetales	Bifidobacteriaceae	RUG039	RUG039 sp900314875
Cow_SGB_0008	91.55	0	1567743	1461	27979	Bacteria	Bacillota_A	Clostridia	Peptostreptococcales	Anaerovoracaceae	RGIG5755	unclassified
Cow_SGB_0009	62.45	2.01	1216345	1391	3560	Bacteria	Bacillota_A	Clostridia	Peptostreptococcales	Anaerovoracaceae	RGIG5755	unclassified
Cow_SGB_0010	92.47	1.67	1342200	1490	6764	Archaea	Thermoplasmatota	Thermoplasmata	Methanomassiliicoccales	Methanomethylophilaceae	SIG5	unclassified
Cow_SGB_0011	92.81	0	1388681	1421	13212	Archaea	Thermoplasmatota	Thermoplasmata	Methanomassiliicoccales	Methanomethylophilaceae	Methanomethylophilus	Methanomethylophilus sp001481295
Cow_SGB_0012	92.88	3.65	1231748	1411	9758	Archaea	Thermoplasmatota	Thermoplasmata	Methanomassiliicoccales	Methanomethylophilaceae	Methanomethylophilus	Methanomethylophilus sp902787415
Cow_SGB_0013	61.7	7.13	852014	1201	2227	Archaea	Thermoplasmatota	Thermoplasmata	Methanomassiliicoccales	Methanomethylophilaceae	Methanomethylophilus	Methanomethylophilus sp902787415
Cow_SGB_0014	51.51	5.09	605242	759	3813	Archaea	Thermoplasmatota	Thermoplasmata	Methanomassiliicoccales	Methanomethylophilaceae	Methanomethylophilus	Methanomethylophilus sp902787415
Cow_SGB_0015	51.63	8.06	721162	1046	1945	Archaea	unclassified	unclassified	unclassified	unclassified	unclassified	unclassified
Cow_SGB_0016	89.11	2.42	1346414	1512	8778	Archaea	Thermoplasmatota	Thermoplasmata	Methanomassiliicoccales	Methanomethylophilaceae	Methanomethylophilus	Methanomethylophilus sp001560915
Cow_SGB_0017	93.15	1.21	1538546	1592	25972	Archaea	Thermoplasmatota	Thermoplasmata	Methanomassiliicoccales	Methanomethylophilaceae	Methanomethylophilus	Methanomethylophilus sp902763685
Cow_SGB_0018	77.13	7.66	1235082	1314	11807	Archaea	Thermoplasmatota	Thermoplasmata	Methanomassiliicoccales	Methanomethylophilaceae	SIG5	unclassified
Cow_SGB_0019	91.78	6.07	1541528	1722	9725	Archaea	Thermoplasmatota	Thermoplasmata	Methanomassiliicoccales	Methanomethylophilaceae	UBA71	UBA71 sp015063285
Cow_SGB_0020	86.69	0.81	1407534	1507	12103	Archaea	Thermoplasmatota	Thermoplasmata	Methanomassiliicoccales	Methanomethylophilaceae	UBA71	unclassified
Cow_SGB_0021	91.53	1.61	1685142	1640	49723	Archaea	Thermoplasmatota	Thermoplasmata	Methanomassiliicoccales	Methanomethylophilaceae	UBA71	unclassified
Cow_SGB_0022	93.15	2.69	1857069	1806	85393	Archaea	Thermoplasmatota	Thermoplasmata	Methanomassiliicoccales	Methanomethylophilaceae	UBA71	UBA71 sp016284295
Cow_SGB_0023	82.43	4.03	1961336	1909	26323	Archaea	Thermoplasmatota	Thermoplasmata	Methanomassiliicoccales	Methanomethylophilaceae	UBA71	UBA71 sp016281925
Cow_SGB_0024	83.86	0.81	1682281	1721	11517	Archaea	Thermoplasmatota	Thermoplasmata	Methanomassiliicoccales	Methanomethylophilaceae	UBA71	UBA71 sp017524805
Cow_SGB_0025	82.85	1.61	1647534	1640	12160	Archaea	Thermoplasmatota	Thermoplasmata	Methanomassiliicoccales	Methanomethylophilaceae	UBA71	UBA71 sp016282555
Cow_SGB_0026	91.47	0.81	1925940	1920	23384	Archaea	Thermoplasmatota	Thermoplasmata	Methanomassiliicoccales	Methanomethylophilaceae	UBA71	UBA71 sp015063165
Cow_SGB_0027	87.31	1.14	2010553	1780	23005	Bacteria	Spirochaetota	Spirochaetia	Sphaerochaetales	Sphaerochaetaceae	UBA9848	UBA9848 sp902797395
Cow_SGB_0028	87.88	0	2077075	1763	18448	Bacteria	Spirochaetota	Spirochaetia	Sphaerochaetales	Sphaerochaetaceae	UBA9848	unclassified
Cow_SGB_0029	75.39	5.64	659879	754	7211	Bacteria	Patescibacteria	Saccharimonadia	Saccharimonadales	Nanosyncoccaceae	Nanosyncoccus	unclassified
Cow_SGB_0030	88.5	0.37	2343350	2329	10240	Bacteria	Pseudomonadota	Gammaproteobacteria	Pseudomonadales	Porticoccaceae	unclassified	unclassified
Cow_SGB_0031	50.23	0.47	800628	979	3070	Bacteria	Patescibacteria	Saccharimonadia	Saccharimonadales	Nanosyncoccaceae	UBA2834	unclassified
Cow_SGB_0032	99.67	0	2474443	2329	120706	Bacteria	Bacillota	Bacilli	Staphylococcales	Staphylococcaceae	Staphylococcus	Staphylococcus epidermidis
Cow_SGB_0033	83.42	0	995547	882	28128	Bacteria	Pseudomonadota	Alphaproteobacteria	RUG11792	RUG11792	RUG11792	RUG11792 sp902772645
Cow_SGB_0034	81.44	7.51	1019414	1015	241217	Bacteria	Patescibacteria	Saccharimonadia	Saccharimonadales	Nanosyncoccaceae	UBA2834	unclassified
Cow_SGB_0035	83.62	5.02	1198150	1261	32750	Bacteria	Patescibacteria	Saccharimonadia	Saccharimonadales	Nanosyncoccaceae	UBA2834	UBA2834 sp016290315
Cow_SGB_0036	61.77	0.95	807705	957	7806	Bacteria	Patescibacteria	Saccharimonadia	Saccharimonadales	Nanosyncoccaceae	UBA2834	UBA2834 sp020626475
Cow_SGB_0037	59.19	2.25	827705	836	17611	Bacteria	Patescibacteria	Saccharimonadia	Saccharimonadales	Nanosyncoccaceae	UBA2834	unclassified
Cow_SGB_0038	55.98	1.85	620497	669	17827	Bacteria	Patescibacteria	Saccharimonadia	Saccharimonadales	Nanosyncoccaceae	UBA2834	unclassified
Cow_SGB_0039	56.98	7.79	1032144	1071	18289	Bacteria	Patescibacteria	Saccharimonadia	Saccharimonadales	Nanosyncoccaceae	UBA2834	UBA2834 sp002371895
Cow_SGB_0040	53.56	0.09	812642	768	37626	Bacteria	Patescibacteria	Saccharimonadia	Saccharimonadales	Nanosyncoccaceae	UBA2834	UBA2834 sp017418275
Cow_SGB_0041	64.67	0.66	988905	1003	15624	Bacteria	Patescibacteria	Saccharimonadia	Saccharimonadales	Nanosyncoccaceae	UBA2834	unclassified
Cow_SGB_0042	55.44	1.09	556322	598	8579	Bacteria	Patescibacteria	Saccharimonadia	Saccharimonadales	Nanosyncoccaceae	UBA2834	UBA2834 sp017430725
Cow_SGB_0043	68.28	0	596901	694	4698	Bacteria	Patescibacteria	Saccharimonadia	Saccharimonadales	Nanosyncoccaceae	Nanosyncoccus	unclassified
Cow_SGB_0044	60.33	1.17	643773	642	11887	Bacteria	Patescibacteria	Saccharimonadia	Saccharimonadales	Nanosyncoccaceae	Nanosyncoccus	Nanosyncoccus sp017421685
Cow_SGB_0045	69.75	3.94	734746	813	8463	Bacteria	Patescibacteria	Saccharimonadia	Saccharimonadales	Nanosyncoccaceae	Nanosyncoccus	unclassified
Cow_SGB_0046	59.32	1.38	840407	808	22202	Bacteria	Patescibacteria	Saccharimonadia	Saccharimonadales	Nanosyncoccaceae	Nanosyncoccus	unclassified
Cow_SGB_0047	80.72	2.59	861130	842	36395	Bacteria	Patescibacteria	Saccharimonadia	Saccharimonadales	Nanosyncoccaceae	Nanosyncoccus	Nanosyncoccus sp017421325
Cow_SGB_0048	54.28	9.73	1147365	1509	2491	Bacteria	Patescibacteria	Saccharimonadia	Saccharimonadales	Nanosyncoccaceae	Nanosyncoccus	unclassified
Cow_SGB_0049	55.75	2.09	567045	656	4855	Bacteria	Patescibacteria	Saccharimonadia	Saccharimonadales	Nanosyncoccaceae	Nanosyncoccus	unclassified
Cow_SGB_0050	61.36	0	565567	526	20696	Bacteria	Patescibacteria	Saccharimonadia	Saccharimonadales	Nanosyncoccaceae	Nanosyncoccus	unclassified
Cow_SGB_0051	82.45	0	871941	805	151795	Bacteria	Patescibacteria	Saccharimonadia	Saccharimonadales	Nanosyncoccaceae	Nanosyncoccus	Nanosyncoccus sp902761145
Cow_SGB_0052	68.03	0.34	694670	673	16989	Bacteria	Patescibacteria	Saccharimonadia	Saccharimonadales	Nanosyncoccaceae	Nanosyncoccus	Nanosyncoccus sp017420185
Cow_SGB_0053	64.73	0.99	664940	674	22988	Bacteria	Patescibacteria	Saccharimonadia	Saccharimonadales	Nanosyncoccaceae	Nanosyncoccus	Nanosyncoccus sp017561835
Cow_SGB_0054	75.39	5.17	702799	682	40547	Bacteria	Patescibacteria	Saccharimonadia	Saccharimonadales	Nanosyncoccaceae	Nanosyncoccus	unclassified
Cow_SGB_0055	68.72	1.98	679510	674	33363	Bacteria	Patescibacteria	Saccharimonadia	Saccharimonadales	Nanosyncoccaceae	Nanosyncoccus	unclassified
Cow_SGB_0056	76	3.1	643658	672	15881	Bacteria	Patescibacteria	Saccharimonadia	Saccharimonadales	Nanosyncoccaceae	Nanosyncoccus	unclassified
Cow_SGB_0057	80.22	0	631348	630	47841	Bacteria	Patescibacteria	Saccharimonadia	Saccharimonadales	Nanosyncoccaceae	Nanosyncoccus	unclassified
Cow_SGB_0058	77.15	0.86	730187	734	34773	Bacteria	Patescibacteria	Saccharimonadia	Saccharimonadales	Nanosyncoccaceae	Nanosyncoccus	Nanosyncoccus sp016282495
Cow_SGB_0059	84.17	0	754552	747	32695	Bacteria	Patescibacteria	Saccharimonadia	Saccharimonadales	Nanosyncoccaceae	Nanosyncoccus	unclassified
Cow_SGB_0060	62.32	0.85	660901	670	32391	Bacteria	Patescibacteria	Saccharimonadia	Saccharimonadales	Nanosyncoccaceae	Nanosyncoccus	unclassified
Cow_SGB_0061	54.8	0	425389	518	3425	Bacteria	Patescibacteria	Saccharimonadia	Saccharimonadales	Nanosyncoccaceae	Nanosyncoccus	Nanosyncoccus sp017652765
Cow_SGB_0062	64.58	0	667526	707	10847	Bacteria	Patescibacteria	Saccharimonadia	Saccharimonadales	Nanosyncoccaceae	Nanosyncoccus	unclassified
Cow_SGB_0063	81.27	6.03	789353	851	11339	Bacteria	Patescibacteria	Saccharimonadia	Saccharimonadales	Nanosyncoccaceae	Nanosyncoccus	unclassified
Cow_SGB_0064	80.42	0	734008	673	46182	Bacteria	Patescibacteria	Saccharimonadia	Saccharimonadales	Nanosyncoccaceae	Nanosyncoccus	unclassified
Cow_SGB_0065	80.72	0	676553	655	63190	Bacteria	Patescibacteria	Saccharimonadia	Saccharimonadales	Nanosyncoccaceae	Nanosyncoccus	unclassified
Cow_SGB_0066	67.27	2.25	621568	659	10221	Bacteria	Patescibacteria	Saccharimonadia	Saccharimonadales	Nanosyncoccaceae	Nanosyncoccus	Nanosyncoccus sp017962365
Cow_SGB_0067	79.57	0	651831	660	55478	Bacteria	Patescibacteria	Saccharimonadia	Saccharimonadales	Nanosyncoccaceae	Nanosyncoccus	Nanosyncoccus sp016280905
Cow_SGB_0068	77.59	4.66	779844	802	39146	Bacteria	Patescibacteria	Saccharimonadia	Saccharimonadales	Nanosyncoccaceae	Nanosyncoccus	unclassified
Cow_SGB_0069	70.32	2.25	780246	951	7734	Bacteria	Patescibacteria	Saccharimonadia	Saccharimonadales	Nanosyncoccaceae	Nanosyncoccus	unclassified
Cow_SGB_0070	83.39	8.62	966057	1022	9496	Bacteria	Patescibacteria	Saccharimonadia	Saccharimonadales	Nanosyncoccaceae	Nanosyncoccus	unclassified
Cow_SGB_0071	80.72	0.16	766527	742	45391	Bacteria	Patescibacteria	Saccharimonadia	Saccharimonadales	Nanosyncoccaceae	Nanosyncoccus	Nanosyncoccus sp016286785
Cow_SGB_0072	55.77	4.21	735467	717	10056	Bacteria	Patescibacteria	Saccharimonadia	Saccharimonadales	Nanosyncoccaceae	Nanosyncoccus	Nanosyncoccus sp017512085
Cow_SGB_0073	72.5	0	613295	602	14935	Bacteria	Patescibacteria	Saccharimonadia	Saccharimonadales	Nanosyncoccaceae	Nanosyncoccus	unclassified
Cow_SGB_0074	77.02	0	705080	681	32884	Bacteria	Patescibacteria	Saccharimonadia	Saccharimonadales	Nanosyncoccaceae	Nanosyncoccus	unclassified
Cow_SGB_0075	75.78	0	677509	720	9336	Bacteria	Patescibacteria	Saccharimonadia	Saccharimonadales	Nanosyncoccaceae	Nanosyncoccus	unclassified
Cow_SGB_0076	62.77	0	497648	556	7986	Bacteria	Patescibacteria	Saccharimonadia	Saccharimonadales	Nanosyncoccaceae	Nanosyncoccus	unclassified
Cow_SGB_0077	60.84	1.69	529032	603	6701	Bacteria	Patescibacteria	Saccharimonadia	Saccharimonadales	Nanosyncoccaceae	Nanosyncoccus	unclassified
Cow_SGB_0078	56.16	0.85	641739	654	13482	Bacteria	Patescibacteria	Saccharimonadia	Saccharimonadales	Nanosyncoccaceae	Nanosyncoccus	unclassified
Cow_SGB_0079	50	3.45	399118	436	8123	Bacteria	Patescibacteria	Saccharimonadia	Saccharimonadales	Nanosyncoccaceae	Nanosyncoccus	Nanosyncoccus sp017613135
Cow_SGB_0080	61.03	0	692602	672	52053	Bacteria	Patescibacteria	Saccharimonadia	Saccharimonadales	Nanosyncoccaceae	Nanosyncoccus	unclassified
Cow_SGB_0081	65.83	0	594341	659	6805	Bacteria	Patescibacteria	Saccharimonadia	Saccharimonadales	Nanosyncoccaceae	Nanosyncoccus	unclassified
Cow_SGB_0082	81.58	0.34	782758	749	30529	Bacteria	Patescibacteria	Saccharimonadia	Saccharimonadales	Nanosyncoccaceae	Nanosyncoccus	unclassified
Cow_SGB_0083	81.51	0.77	1443437	1390	7695	Bacteria	Bacillota_A	Clostridia	Peptostreptococcales	Anaerovoracaceae	Eubacterium_B	Eubacterium_B sp902766915
Cow_SGB_0084	83.06	2.65	1701656	1542	7787	Bacteria	Bacillota_A	Clostridia	Peptostreptococcales	Anaerovoracaceae	Eubacterium_B	Eubacterium_B sp902797405
Cow_SGB_0085	99.3	0	4368996	4211	388808	Bacteria	Bacillota_A	Clostridia	Eubacteriales	Eubacteriaceae	Eubacterium	Eubacterium callanderi
Cow_SGB_0086	98.58	0.71	1784900	1703	119674	Bacteria	Bacillota_A	Clostridia	Peptostreptococcales	Anaerovoracaceae	S5-A14a	S5-A14a sp900112915
Cow_SGB_0087	100	0	2277407	2148	156464	Bacteria	Bacillota_A	Clostridia	Peptostreptococcales	Peptostreptococcaceae	Peptostreptococcus	Peptostreptococcus sp900112955
Cow_SGB_0088	100	0	3950550	3600	205731	Bacteria	Pseudomonadota	Gammaproteobacteria	Enterobacterales	Enterobacteriaceae	Proteus	Proteus mirabilis
Cow_SGB_0089	91.4	1.72	3120779	2732	14592	Bacteria	Bacteroidota	Bacteroidia	Bacteroidales	W3P20-009	W3P20-009	W3P20-009 sp017539645
Cow_SGB_0090	100	0	3916412	3620	445944	Bacteria	Pseudomonadota	Gammaproteobacteria	Enterobacterales	Enterobacteriaceae	Morganella	Morganella morganii
Cow_SGB_0091	99.91	0.32	4959778	4668	436280	Bacteria	Pseudomonadota	Gammaproteobacteria	Enterobacterales	Enterobacteriaceae	Citrobacter_A	Citrobacter_A amalonaticus
Cow_SGB_0092	99.97	0.04	4625254	4331	147579	Bacteria	Pseudomonadota	Gammaproteobacteria	Enterobacterales	Enterobacteriaceae	Escherichia	Escherichia coli
Cow_SGB_0093	98.45	0.55	4483221	4107	575830	Bacteria	Pseudomonadota	Gammaproteobacteria	Enterobacterales	Enterobacteriaceae	Enterobacter_D	Enterobacter_D sp900116015
Cow_SGB_0094	65.52	6.43	1438951	1534	6233	Bacteria	Bacillota_A	Clostridia	Peptostreptococcales	Anaerovoracaceae	UBA3738	unclassified
Cow_SGB_0095	81.73	6.44	1937447	1943	5595	Bacteria	Bacillota_A	Clostridia	Peptostreptococcales	Anaerovoracaceae	Lentihominibacter	unclassified
Cow_SGB_0096	97.04	0.71	1563627	1407	162461	Bacteria	Bacillota_A	Clostridia	Peptostreptococcales	Anaerovoracaceae	Eubacterium_B	Eubacterium_B sp002472145
Cow_SGB_0097	80.65	3.43	1360203	1409	6304	Bacteria	Bacillota_A	Clostridia	Peptostreptococcales	Anaerovoracaceae	UBA3738	UBA3738 sp902803725
Cow_SGB_0098	92.2	0.71	1897256	1639	45002	Bacteria	Bacillota_A	Clostridia	Peptostreptococcales	Anaerovoracaceae	RUG708	RUG708 sp900321625
Cow_SGB_0099	83.36	0.71	1309099	1291	7355	Bacteria	Bacillota_A	Clostridia	Peptostreptococcales	Anaerovoracaceae	RUG14258	RUG14258 sp902797345
Cow_SGB_0100	86.41	3.57	1578644	1606	6299	Bacteria	Bacillota_A	Clostridia	Peptostreptococcales	Anaerovoracaceae	RUG14258	RUG14258 sp017515705
Cow_SGB_0101	91.64	2.9	2220246	2125	7178	Bacteria	Bacillota_A	Clostridia	Peptostreptococcales	Anaerovoracaceae	RUG708	unclassified
Cow_SGB_0102	97.98	1.42	2408162	2125	49015	Bacteria	Bacillota_A	Clostridia	Peptostreptococcales	Anaerovoracaceae	RUG708	unclassified
Cow_SGB_0103	91.73	0.83	1607337	1514	12053	Bacteria	Bacillota_A	Clostridia	Peptostreptococcales	Anaerovoracaceae	Eubacterium_T	Eubacterium_T sp900318155
Cow_SGB_0104	81.87	4.95	3472331	3205	14165	Bacteria	Chloroflexota	Anaerolineae	Anaerolineales	Anaerolineaceae	Flexilinea	Flexilinea sp902795255
Cow_SGB_0105	83.51	2.48	1937951	1853	6812	Bacteria	Bacillota_A	Clostridia	Peptostreptococcales	Anaerovoracaceae	Lentihominibacter	Lentihominibacter sp902766185
Cow_SGB_0106	83	0	1385766	1395	6206	Bacteria	Bacillota_A	Clostridia	Peptostreptococcales	Anaerovoracaceae	Lentihominibacter	Lentihominibacter sp902796875
Cow_SGB_0107	84.52	1.06	1621773	1675	5329	Bacteria	Bacillota_A	Clostridia	Peptostreptococcales	Anaerovoracaceae	Lentihominibacter	Lentihominibacter sp902797095
Cow_SGB_0108	66.85	1.72	2027259	1968	4899	Bacteria	Bacillota_A	Clostridia	Oscillospirales	Ruminococcaceae	Ruminococcus	unclassified
Cow_SGB_0109	81.21	0.71	1547073	1561	5890	Bacteria	Bacillota_A	Clostridia	Peptostreptococcales	Anaerovoracaceae	Lentihominibacter	Lentihominibacter sp902797195
Cow_SGB_0110	83.15	4.6	1342860	1475	4980	Bacteria	Elusimicrobiota	Elusimicrobia	Elusimicrobiales	Elusimicrobiaceae	Avelusimicrobium	unclassified
Cow_SGB_0111	90.82	2.46	1408801	1525	10133	Bacteria	Elusimicrobiota	Elusimicrobia	Elusimicrobiales	Elusimicrobiaceae	UBA1436	unclassified
Cow_SGB_0112	86.94	2.69	1248244	1329	8697	Bacteria	Elusimicrobiota	Elusimicrobia	Elusimicrobiales	Elusimicrobiaceae	Avelusimicrobium	unclassified
Cow_SGB_0113	77.19	1.33	1077644	1201	4803	Bacteria	Elusimicrobiota	Elusimicrobia	Elusimicrobiales	Elusimicrobiaceae	Avelusimicrobium	unclassified
Cow_SGB_0114	75.52	0.91	1279432	1219	53813	Bacteria	Elusimicrobiota	Elusimicrobia	Elusimicrobiales	Elusimicrobiaceae	Avelusimicrobium	Avelusimicrobium sp017546175
Cow_SGB_0115	88.79	1.12	1268043	1204	83297	Bacteria	Elusimicrobiota	Elusimicrobia	Elusimicrobiales	Elusimicrobiaceae	Avelusimicrobium	Avelusimicrobium sp017520185
Cow_SGB_0116	88.63	1.79	1113300	1201	6481	Bacteria	Elusimicrobiota	Elusimicrobia	Elusimicrobiales	Elusimicrobiaceae	Avelusimicrobium	unclassified
Cow_SGB_0117	90.83	0.75	1312172	1258	69853	Bacteria	Elusimicrobiota	Elusimicrobia	Elusimicrobiales	Elusimicrobiaceae	Avelusimicrobium	Avelusimicrobium sp902797165
Cow_SGB_0118	96.63	0	1506859	1398	44822	Bacteria	Elusimicrobiota	Elusimicrobia	Elusimicrobiales	Elusimicrobiaceae	UBA1436	unclassified
Cow_SGB_0119	96.63	0	1426299	1352	87268	Bacteria	Elusimicrobiota	Elusimicrobia	Elusimicrobiales	Elusimicrobiaceae	UBA1436	UBA1436 sp015062115
Cow_SGB_0120	90.42	0	1433156	1441	46339	Bacteria	Elusimicrobiota	Elusimicrobia	Elusimicrobiales	Elusimicrobiaceae	UBA1436	UBA1436 sp902794125
Cow_SGB_0121	96.63	0.1	1613106	1663	9651	Bacteria	Elusimicrobiota	Elusimicrobia	Elusimicrobiales	Elusimicrobiaceae	UBA1436	UBA1436 sp002329395
Cow_SGB_0122	94.38	0	1589099	1521	29728	Bacteria	Elusimicrobiota	Elusimicrobia	Elusimicrobiales	Elusimicrobiaceae	UBA1436	unclassified
Cow_SGB_0123	88.95	1.19	1439758	1671	3845	Bacteria	Elusimicrobiota	Elusimicrobia	Elusimicrobiales	Elusimicrobiaceae	UBA1436	unclassified
Cow_SGB_0124	89.13	8.99	2856738	4028	3767	Bacteria	Elusimicrobiota	Elusimicrobia	Elusimicrobiales	Elusimicrobiaceae	UBA1436	unclassified
Cow_SGB_0125	92.7	0	1239875	1197	33431	Bacteria	Elusimicrobiota	Elusimicrobia	Elusimicrobiales	Elusimicrobiaceae	UBA1436	UBA1436 sp902761975
Cow_SGB_0126	83.57	1.69	1150162	1134	11372	Bacteria	Elusimicrobiota	Elusimicrobia	Elusimicrobiales	Elusimicrobiaceae	UBA1436	UBA1436 sp902767385
Cow_SGB_0127	89.89	0.1	1274194	1324	12780	Bacteria	Elusimicrobiota	Elusimicrobia	Elusimicrobiales	Elusimicrobiaceae	UBA1436	UBA1436 sp900319325
Cow_SGB_0128	96.63	0	1391746	1317	284683	Bacteria	Elusimicrobiota	Elusimicrobia	Elusimicrobiales	Elusimicrobiaceae	UBA1436	UBA1436 sp900319885
Cow_SGB_0129	57.98	2.58	825665	1078	2625	Bacteria	Elusimicrobiota	Elusimicrobia	Elusimicrobiales	Elusimicrobiaceae	UBA1436	unclassified
Cow_SGB_0130	94.19	1.23	1264869	1241	18157	Bacteria	Elusimicrobiota	Elusimicrobia	Elusimicrobiales	Elusimicrobiaceae	UBA1436	unclassified
Cow_SGB_0131	93.04	0	1516299	1577	10782	Bacteria	Elusimicrobiota	Elusimicrobia	Elusimicrobiales	Elusimicrobiaceae	UBA1436	unclassified
Cow_SGB_0132	94.19	1.32	1348323	1350	37110	Bacteria	Elusimicrobiota	Elusimicrobia	Elusimicrobiales	Elusimicrobiaceae	UBA1436	UBA1436 sp902798835
Cow_SGB_0133	90.5	1.12	1419448	1365	48160	Bacteria	Elusimicrobiota	Elusimicrobia	Elusimicrobiales	Elusimicrobiaceae	UBA1436	UBA1436 sp016282685
Cow_SGB_0134	87.81	4.17	1232365	1253	11523	Bacteria	Elusimicrobiota	Elusimicrobia	Elusimicrobiales	Elusimicrobiaceae	UBA1436	UBA1436 sp902772695
Cow_SGB_0135	92.13	1.12	1400007	1321	93450	Bacteria	Elusimicrobiota	Elusimicrobia	Elusimicrobiales	Elusimicrobiaceae	UBA1436	UBA1436 sp016283355
Cow_SGB_0136	95.81	0	1477946	1375	108318	Bacteria	Elusimicrobiota	Elusimicrobia	Elusimicrobiales	Elusimicrobiaceae	UBA1436	unclassified
Cow_SGB_0137	96.56	0	1408682	1312	264569	Bacteria	Elusimicrobiota	Elusimicrobia	Elusimicrobiales	Elusimicrobiaceae	UBA1436	UBA1436 sp902765225
Cow_SGB_0138	91.67	0	1361600	1279	77881	Bacteria	Elusimicrobiota	Elusimicrobia	Elusimicrobiales	Elusimicrobiaceae	UBA1436	unclassified
Cow_SGB_0139	94.99	1.12	1350166	1274	43544	Bacteria	Elusimicrobiota	Elusimicrobia	Elusimicrobiales	Elusimicrobiaceae	UBA1436	UBA1436 sp002309715
Cow_SGB_0140	96.63	0	1461305	1416	60577	Bacteria	Elusimicrobiota	Elusimicrobia	Elusimicrobiales	Elusimicrobiaceae	UBA1436	UBA1436 sp900315795
Cow_SGB_0141	84.6	0	1429733	1380	28214	Bacteria	Elusimicrobiota	Elusimicrobia	Elusimicrobiales	Elusimicrobiaceae	UBA1436	unclassified
Cow_SGB_0142	96.63	0	1463713	1391	210903	Bacteria	Elusimicrobiota	Elusimicrobia	Elusimicrobiales	Elusimicrobiaceae	UBA1436	UBA1436 sp900315845
Cow_SGB_0143	89.3	1.12	1357042	1343	20582	Bacteria	Elusimicrobiota	Elusimicrobia	Elusimicrobiales	Elusimicrobiaceae	UBA1436	UBA1436 sp902766765
Cow_SGB_0144	96.63	1.12	1450640	1393	75783	Bacteria	Elusimicrobiota	Elusimicrobia	Elusimicrobiales	Elusimicrobiaceae	UBA1436	UBA1436 sp902794895
Cow_SGB_0145	88	0	1182165	1306	4762	Bacteria	Elusimicrobiota	Elusimicrobia	Elusimicrobiales	Elusimicrobiaceae	UBA1436	unclassified
Cow_SGB_0146	90.88	2.25	1440519	1462	11258	Bacteria	Elusimicrobiota	Elusimicrobia	Elusimicrobiales	Elusimicrobiaceae	UBA1436	UBA1436 sp902781765
Cow_SGB_0147	87.09	1.12	1329739	1218	37877	Bacteria	Elusimicrobiota	Elusimicrobia	Elusimicrobiales	Elusimicrobiaceae	UBA1436	unclassified
Cow_SGB_0148	96.63	0	1755317	1581	56479	Bacteria	Elusimicrobiota	Elusimicrobia	Elusimicrobiales	Elusimicrobiaceae	UBA1174	UBA1174 sp900556855
Cow_SGB_0149	92.42	0.1	1512203	1460	14023	Bacteria	Elusimicrobiota	Elusimicrobia	Elusimicrobiales	Elusimicrobiaceae	UBA1174	UBA1174 sp902791965
Cow_SGB_0150	96.63	1.12	1487068	1377	48781	Bacteria	Elusimicrobiota	Elusimicrobia	Elusimicrobiales	Elusimicrobiaceae	UBA1174	unclassified
Cow_SGB_0151	96.63	1.12	1455682	1357	163723	Bacteria	Elusimicrobiota	Elusimicrobia	Elusimicrobiales	Elusimicrobiaceae	UBA1174	unclassified
Cow_SGB_0152	95.51	2.25	1409853	1285	92028	Bacteria	Elusimicrobiota	Elusimicrobia	Elusimicrobiales	Elusimicrobiaceae	UBA1174	UBA1174 sp017534965
Cow_SGB_0153	85.99	0	1290200	1168	33283	Bacteria	Elusimicrobiota	Elusimicrobia	Elusimicrobiales	Elusimicrobiaceae	UBA1174	unclassified
Cow_SGB_0154	93.26	1.23	1355868	1284	19232	Bacteria	Elusimicrobiota	Elusimicrobia	Elusimicrobiales	Elusimicrobiaceae	UBA1174	unclassified
Cow_SGB_0155	92.88	1.12	1252771	1154	22790	Bacteria	Elusimicrobiota	Elusimicrobia	Elusimicrobiales	Elusimicrobiaceae	UBA1174	unclassified
Cow_SGB_0156	96.63	1.12	1248384	1157	46307	Bacteria	Elusimicrobiota	Elusimicrobia	Elusimicrobiales	Elusimicrobiaceae	UBA1174	unclassified
Cow_SGB_0157	64.69	2.55	606586	775	2706	Bacteria	Elusimicrobiota	Elusimicrobia	Elusimicrobiales	Elusimicrobiaceae	UBA1174	unclassified
Cow_SGB_0158	96.63	8.39	1506521	1427	106113	Bacteria	Elusimicrobiota	Elusimicrobia	Elusimicrobiales	Elusimicrobiaceae	UBA1174	UBA1174 sp016281355
Cow_SGB_0159	80.34	2.25	1079336	1114	14132	Bacteria	Elusimicrobiota	Elusimicrobia	Elusimicrobiales	Elusimicrobiaceae	UBA1174	UBA1174 sp902787065
Cow_SGB_0160	82.4	2.25	1259755	1239	12661	Bacteria	Elusimicrobiota	Elusimicrobia	Elusimicrobiales	Elusimicrobiaceae	UBA1174	unclassified
Cow_SGB_0161	89.01	2.2	905994	944	26205	Bacteria	Pseudomonadota	Alphaproteobacteria	Rs-D84	Rs-D84	Enterousia	unclassified
Cow_SGB_0162	87.36	0	826273	807	53246	Bacteria	Pseudomonadota	Alphaproteobacteria	Rs-D84	Rs-D84	Enterousia	unclassified
Cow_SGB_0163	70.5	2.4	737253	915	3487	Bacteria	Pseudomonadota	Alphaproteobacteria	Rs-D84	Rs-D84	Enterousia	unclassified
Cow_SGB_0164	87.91	0	793408	819	39995	Bacteria	Pseudomonadota	Alphaproteobacteria	Rs-D84	Rs-D84	Enterousia	Enterousia sp902787665
Cow_SGB_0165	81.32	0	710241	712	34000	Bacteria	Pseudomonadota	Alphaproteobacteria	Rs-D84	Rs-D84	Enterousia	unclassified
Cow_SGB_0166	86.81	0	838600	857	80724	Bacteria	Pseudomonadota	Alphaproteobacteria	Rs-D84	Rs-D84	Enterousia	unclassified
Cow_SGB_0167	84.07	0	857750	940	30534	Bacteria	Pseudomonadota	Alphaproteobacteria	Rs-D84	Rs-D84	Enterousia	Enterousia sp902799285
Cow_SGB_0168	83.52	0	943002	1049	22170	Bacteria	Pseudomonadota	Alphaproteobacteria	Rs-D84	Rs-D84	Enterousia	Enterousia sp902774305
Cow_SGB_0169	85.53	1.1	867569	892	28761	Bacteria	Pseudomonadota	Alphaproteobacteria	Rs-D84	Rs-D84	Enterousia	Enterousia sp002371155
Cow_SGB_0170	82.01	0	740383	741	19821	Bacteria	Pseudomonadota	Alphaproteobacteria	Rs-D84	Rs-D84	Enterousia	unclassified
Cow_SGB_0171	86.81	0	898232	874	92591	Bacteria	Pseudomonadota	Alphaproteobacteria	Rs-D84	Rs-D84	Enterousia	Enterousia sp902793435
Cow_SGB_0172	86.81	0	949878	924	146895	Bacteria	Pseudomonadota	Alphaproteobacteria	Rs-D84	Rs-D84	Enterousia	Enterousia sp902802115
Cow_SGB_0173	87.91	0	892888	873	183802	Bacteria	Pseudomonadota	Alphaproteobacteria	Rs-D84	Rs-D84	Enterousia	Enterousia sp902793005
Cow_SGB_0174	85.71	0	843556	827	130801	Bacteria	Pseudomonadota	Alphaproteobacteria	Rs-D84	Rs-D84	Enterousia	Enterousia sp902788485
Cow_SGB_0175	80.35	0	765880	761	28921	Bacteria	Pseudomonadota	Alphaproteobacteria	Rs-D84	Rs-D84	Enterousia	unclassified
Cow_SGB_0176	81.98	0	835137	855	20475	Bacteria	Pseudomonadota	Alphaproteobacteria	Rs-D84	Rs-D84	Enterousia	unclassified
Cow_SGB_0177	86.81	0.1	923425	924	74563	Bacteria	Pseudomonadota	Alphaproteobacteria	Rs-D84	Rs-D84	Enterousia	unclassified
Cow_SGB_0178	85.35	2.38	864054	949	12426	Bacteria	Pseudomonadota	Alphaproteobacteria	Rs-D84	Rs-D84	Enterousia	Enterousia sp902776515
Cow_SGB_0179	87.91	0	894842	899	59232	Bacteria	Pseudomonadota	Alphaproteobacteria	Rs-D84	Rs-D84	Enterousia	Enterousia sp902790415
Cow_SGB_0180	87.91	0	914299	907	352393	Bacteria	Pseudomonadota	Alphaproteobacteria	Rs-D84	Rs-D84	Enterousia	Enterousia sp900320405
Cow_SGB_0181	80.92	0	820943	834	20614	Bacteria	Pseudomonadota	Alphaproteobacteria	Rs-D84	Rs-D84	Enterousia	unclassified
Cow_SGB_0182	85.71	0.55	951327	962	28437	Bacteria	Pseudomonadota	Alphaproteobacteria	Rs-D84	Rs-D84	Enterousia	Enterousia sp902784285
Cow_SGB_0183	83.42	2.2	848048	916	11820	Bacteria	Pseudomonadota	Alphaproteobacteria	Rs-D84	Rs-D84	Enterousia	unclassified
Cow_SGB_0184	87.91	0	969765	938	191454	Bacteria	Pseudomonadota	Alphaproteobacteria	Rs-D84	Rs-D84	Enterousia	Enterousia sp902801125
Cow_SGB_0185	85.71	0	836327	803	688656	Bacteria	Pseudomonadota	Alphaproteobacteria	Rs-D84	Rs-D84	Enterousia	Enterousia sp902762295
Cow_SGB_0186	83.97	1.3	950405	1019	13034	Bacteria	Pseudomonadota	Alphaproteobacteria	Rs-D84	Rs-D84	Enterousia	Enterousia sp016285415
Cow_SGB_0187	89.01	0	969079	958	67740	Bacteria	Pseudomonadota	Alphaproteobacteria	Rs-D84	Rs-D84	Enterousia	Enterousia sp902771695
Cow_SGB_0188	88.46	1.1	780645	754	76651	Bacteria	Pseudomonadota	Alphaproteobacteria	Rs-D84	Rs-D84	Enterousia	unclassified
Cow_SGB_0189	85.35	2.3	876222	896	12806	Bacteria	Pseudomonadota	Alphaproteobacteria	Rs-D84	Rs-D84	Enterousia	unclassified
Cow_SGB_0190	89.01	0	1013071	966	190409	Bacteria	Pseudomonadota	Alphaproteobacteria	Rs-D84	Rs-D84	Enterousia	unclassified
Cow_SGB_0191	87.91	0	941632	928	39701	Bacteria	Pseudomonadota	Alphaproteobacteria	Rs-D84	Rs-D84	Enterousia	unclassified
Cow_SGB_0192	81.32	0	786744	906	5953	Bacteria	Pseudomonadota	Alphaproteobacteria	Rs-D84	Rs-D84	Enterousia	unclassified
Cow_SGB_0193	65.79	1.1	696761	819	4690	Bacteria	Pseudomonadota	Alphaproteobacteria	Rs-D84	Rs-D84	Enterousia	unclassified
Cow_SGB_0194	71.43	3.91	876781	1035	4748	Bacteria	Pseudomonadota	Alphaproteobacteria	Rs-D84	Rs-D84	Enterousia	unclassified
Cow_SGB_0195	87.91	0	939612	905	542514	Bacteria	Pseudomonadota	Alphaproteobacteria	Rs-D84	Rs-D84	Enterousia	unclassified
Cow_SGB_0196	83.13	1.3	832534	917	7985	Bacteria	Pseudomonadota	Alphaproteobacteria	Rs-D84	Rs-D84	Enterousia	unclassified
Cow_SGB_0197	82.07	2.2	824721	831	18585	Bacteria	Pseudomonadota	Alphaproteobacteria	Rs-D84	Rs-D84	Enterousia	unclassified
Cow_SGB_0198	87.91	0	939477	951	32847	Bacteria	Pseudomonadota	Alphaproteobacteria	Rs-D84	Rs-D84	Enterousia	unclassified
Cow_SGB_0199	87.31	2.2	954832	916	90190	Bacteria	Pseudomonadota	Alphaproteobacteria	Rs-D84	Rs-D84	Enterousia	Enterousia sp902795435
Cow_SGB_0200	81.06	1.1	787539	842	26155	Bacteria	Pseudomonadota	Alphaproteobacteria	Rs-D84	Rs-D84	Enterousia	unclassified
Cow_SGB_0201	84.02	0	896511	860	40313	Bacteria	Pseudomonadota	Alphaproteobacteria	Rs-D84	Rs-D84	Enterousia	unclassified
Cow_SGB_0202	87.91	0	918534	934	22480	Bacteria	Pseudomonadota	Alphaproteobacteria	Rs-D84	Rs-D84	Enterousia	unclassified
Cow_SGB_0203	87.91	2.3	818487	839	30860	Bacteria	Pseudomonadota	Alphaproteobacteria	Rs-D84	Rs-D84	Enterousia	Enterousia sp902771095
Cow_SGB_0204	84.42	0	889817	852	32474	Bacteria	Pseudomonadota	Alphaproteobacteria	Rs-D84	Rs-D84	Enterousia	unclassified
Cow_SGB_0205	88.46	0.06	920277	929	22951	Bacteria	Pseudomonadota	Alphaproteobacteria	Rs-D84	Rs-D84	Enterousia	Enterousia sp017524525
Cow_SGB_0206	86.75	1.65	936949	914	25542	Bacteria	Pseudomonadota	Alphaproteobacteria	Rs-D84	Rs-D84	Enterousia	unclassified
Cow_SGB_0207	83.77	0.06	854578	890	14248	Bacteria	Pseudomonadota	Alphaproteobacteria	Rs-D84	Rs-D84	Enterousia	unclassified
Cow_SGB_0208	85.61	1.1	800468	844	21406	Bacteria	Pseudomonadota	Alphaproteobacteria	Rs-D84	Rs-D84	Enterousia	unclassified
Cow_SGB_0209	84.02	8.79	840096	856	26323	Bacteria	Pseudomonadota	Alphaproteobacteria	Rs-D84	Rs-D84	Enterousia	unclassified
Cow_SGB_0210	81.9	0	859048	898	20128	Bacteria	Pseudomonadota	Alphaproteobacteria	Rs-D84	Rs-D84	Enterousia	Enterousia sp900313285
Cow_SGB_0211	87.91	0	811599	817	191894	Bacteria	Pseudomonadota	Alphaproteobacteria	Rs-D84	Rs-D84	Enterousia	Enterousia sp002348925
Cow_SGB_0212	86.82	0	784883	769	152716	Bacteria	Pseudomonadota	Alphaproteobacteria	Rs-D84	Rs-D84	Enterousia	Enterousia sp902784345
Cow_SGB_0213	86.31	0	855435	827	532543	Bacteria	Pseudomonadota	Alphaproteobacteria	Rs-D84	Rs-D84	Enterousia	Enterousia sp902774285
Cow_SGB_0214	86.81	0	851409	867	96026	Bacteria	Pseudomonadota	Alphaproteobacteria	Rs-D84	Rs-D84	Enterousia	Enterousia sp902798205
Cow_SGB_0215	86.25	0	874442	857	231319	Bacteria	Pseudomonadota	Alphaproteobacteria	Rs-D84	Rs-D84	Enterousia	Enterousia sp900321105
Cow_SGB_0216	87.91	0	898703	929	263866	Bacteria	Pseudomonadota	Alphaproteobacteria	Rs-D84	Rs-D84	Enterousia	Enterousia sp902781465
Cow_SGB_0217	82.52	0.55	783698	827	19331	Bacteria	Pseudomonadota	Alphaproteobacteria	Rs-D84	Rs-D84	Enterousia	unclassified
Cow_SGB_0218	89.01	0	901752	855	266433	Bacteria	Pseudomonadota	Alphaproteobacteria	Rs-D84	Rs-D84	Enterousia	unclassified
Cow_SGB_0219	86.63	0	827721	802	42935	Bacteria	Pseudomonadota	Alphaproteobacteria	Rs-D84	Rs-D84	Enterousia	unclassified
Cow_SGB_0220	84.62	0	821717	788	64287	Bacteria	Pseudomonadota	Alphaproteobacteria	Rs-D84	Rs-D84	Enterousia	unclassified
Cow_SGB_0221	89.01	0	949434	943	125176	Bacteria	Pseudomonadota	Alphaproteobacteria	Rs-D84	Rs-D84	Enterousia	unclassified
Cow_SGB_0222	80.16	0	734793	818	8914	Bacteria	Pseudomonadota	Alphaproteobacteria	Rs-D84	Rs-D84	Enterousia	unclassified
Cow_SGB_0223	80.04	1.23	821411	901	8923	Bacteria	Pseudomonadota	Alphaproteobacteria	Rs-D84	Rs-D84	Enterousia	unclassified
Cow_SGB_0224	68.88	2.2	747955	803	10273	Bacteria	Pseudomonadota	Alphaproteobacteria	Rs-D84	Rs-D84	Enterousia	Enterousia sp017502865
Cow_SGB_0225	69.66	3.45	1877395	1639	25279	Bacteria	Bacteroidota	Bacteroidia	Bacteroidales	UBA932	Cryptobacteroides	unclassified
Cow_SGB_0226	81.37	0.55	743712	779	17351	Bacteria	Pseudomonadota	Alphaproteobacteria	Rs-D84	Rs-D84	Enterousia	Enterousia sp015062495
Cow_SGB_0227	89.01	0	860243	852	36385	Bacteria	Pseudomonadota	Alphaproteobacteria	Rs-D84	Rs-D84	Enterousia	Enterousia sp015062525
Cow_SGB_0228	57.98	0	514290	617	3377	Bacteria	Pseudomonadota	Alphaproteobacteria	Rs-D84	Rs-D84	Enterousia	unclassified
Cow_SGB_0229	77.82	1.1	770785	850	9822	Bacteria	Pseudomonadota	Alphaproteobacteria	Rs-D84	Rs-D84	Enterousia	Enterousia sp017383325
Cow_SGB_0230	86.81	0	993000	980	171294	Bacteria	Pseudomonadota	Alphaproteobacteria	Rs-D84	Rs-D84	Enterousia	unclassified
Cow_SGB_0231	74.73	1.3	887218	882	61095	Bacteria	Pseudomonadota	Alphaproteobacteria	Rs-D84	Rs-D84	Enterousia	Enterousia sp017520675
Cow_SGB_0232	78.86	3.9	813207	911	7362	Bacteria	Pseudomonadota	Alphaproteobacteria	Rs-D84	Rs-D84	Enterousia	Enterousia sp017546085
Cow_SGB_0233	70.12	2.3	742532	871	4364	Bacteria	Pseudomonadota	Alphaproteobacteria	Rs-D84	Rs-D84	Enterousia	unclassified
Cow_SGB_0234	85.71	1.41	934256	949	73935	Bacteria	Pseudomonadota	Alphaproteobacteria	Rs-D84	Rs-D84	Enterousia	unclassified
Cow_SGB_0235	87.91	0	937893	914	160645	Bacteria	Pseudomonadota	Alphaproteobacteria	Rs-D84	Rs-D84	Enterousia	unclassified
Cow_SGB_0236	87.41	2.98	1054597	1096	62621	Bacteria	Pseudomonadota	Alphaproteobacteria	Rs-D84	Rs-D84	Enterousia	Enterousia sp017472065
Cow_SGB_0237	87.91	3.3	1036515	1102	97981	Bacteria	Pseudomonadota	Alphaproteobacteria	Rs-D84	Rs-D84	Enterousia	unclassified
Cow_SGB_0238	83.29	0	861491	853	56970	Bacteria	Pseudomonadota	Alphaproteobacteria	Rs-D84	Rs-D84	Enterousia	unclassified
Cow_SGB_0239	88.72	1.02	920824	902	57750	Bacteria	Pseudomonadota	Alphaproteobacteria	Rs-D84	Rs-D84	Enterousia	unclassified
Cow_SGB_0240	83.52	0	822842	801	75642	Bacteria	Pseudomonadota	Alphaproteobacteria	Rs-D84	Rs-D84	Enterousia	unclassified
Cow_SGB_0241	61.05	2.2	587057	723	3574	Bacteria	Pseudomonadota	Alphaproteobacteria	Rs-D84	Rs-D84	Enterousia	unclassified
Cow_SGB_0242	85.07	1.1	1019157	1005	44516	Bacteria	Pseudomonadota	Alphaproteobacteria	Rs-D84	Rs-D84	Enterousia	unclassified
Cow_SGB_0243	86.81	5.78	1051518	1051	40682	Bacteria	Pseudomonadota	Alphaproteobacteria	Rs-D84	Rs-D84	Enterousia	unclassified
Cow_SGB_0244	76.23	2.2	854065	1062	3709	Bacteria	Pseudomonadota	Alphaproteobacteria	Rs-D84	Rs-D84	Enterousia	unclassified
Cow_SGB_0245	79.57	0	890194	928	18638	Bacteria	Pseudomonadota	Alphaproteobacteria	Rs-D84	Rs-D84	Enterousia	unclassified
Cow_SGB_0246	84.47	1.45	1020667	1128	9501	Bacteria	Pseudomonadota	Alphaproteobacteria	Rs-D84	Rs-D84	Enterousia	unclassified
Cow_SGB_0247	79.55	1.1	948175	1024	13612	Bacteria	Pseudomonadota	Alphaproteobacteria	Rs-D84	Rs-D84	Enterousia	unclassified
Cow_SGB_0248	80.46	2.5	943584	1013	12720	Bacteria	Pseudomonadota	Alphaproteobacteria	Rs-D84	Rs-D84	Enterousia	unclassified
Cow_SGB_0249	85.78	0	959167	953	110400	Bacteria	Pseudomonadota	Alphaproteobacteria	Rs-D84	Rs-D84	Enterousia	unclassified
Cow_SGB_0250	50.96	0.09	679650	793	5367	Bacteria	Pseudomonadota	Alphaproteobacteria	Rs-D84	Rs-D84	Enterousia	unclassified
Cow_SGB_0251	80.8	0.06	856665	841	71519	Bacteria	Pseudomonadota	Alphaproteobacteria	Rs-D84	Rs-D84	Enterousia	Enterousia sp017937735
Cow_SGB_0252	84.39	1.16	957078	946	40869	Bacteria	Pseudomonadota	Alphaproteobacteria	Rs-D84	Rs-D84	Enterousia	Enterousia sp017425725
Cow_SGB_0253	73.3	1.65	789065	876	6381	Bacteria	Pseudomonadota	Alphaproteobacteria	Rs-D84	Rs-D84	Enterousia	unclassified
Cow_SGB_0254	80.49	1.71	843225	877	16110	Bacteria	Pseudomonadota	Alphaproteobacteria	Rs-D84	Rs-D84	Enterousia	unclassified
Cow_SGB_0255	67.51	3.3	899584	1101	3699	Bacteria	Pseudomonadota	Alphaproteobacteria	Rs-D84	Rs-D84	Enterousia	unclassified
Cow_SGB_0256	84.91	0	849916	842	83621	Bacteria	Pseudomonadota	Alphaproteobacteria	Rs-D84	Rs-D84	Enterousia	unclassified
Cow_SGB_0257	75.18	1.1	854907	851	104126	Bacteria	Pseudomonadota	Alphaproteobacteria	Rs-D84	Rs-D84	Enterousia	unclassified
Cow_SGB_0258	75.6	1.29	977275	1088	8313	Bacteria	Pseudomonadota	Alphaproteobacteria	Rs-D84	Rs-D84	Enterousia	Enterousia sp017554665
Cow_SGB_0259	78.19	2.43	851465	989	6095	Bacteria	Pseudomonadota	Alphaproteobacteria	Rs-D84	Rs-D84	Enterousia	Enterousia sp017630405
Cow_SGB_0260	86.45	0.55	895915	935	16598	Bacteria	Pseudomonadota	Alphaproteobacteria	Rs-D84	Rs-D84	Enterousia	unclassified
Cow_SGB_0261	84.47	2.75	885297	892	30853	Bacteria	Pseudomonadota	Alphaproteobacteria	Rs-D84	Rs-D84	Enterousia	Enterousia sp904502095
Cow_SGB_0262	80.82	1.23	966082	1004	39095	Bacteria	Pseudomonadota	Alphaproteobacteria	Rs-D84	Rs-D84	Enterousia	unclassified
Cow_SGB_0263	61.26	1.16	696050	870	3568	Bacteria	Pseudomonadota	Alphaproteobacteria	Rs-D84	Rs-D84	Enterousia	unclassified
Cow_SGB_0264	81.21	1.85	940690	1041	14509	Bacteria	Pseudomonadota	Alphaproteobacteria	Rs-D84	Rs-D84	Enterousia	unclassified
Cow_SGB_0265	85.33	1.2	938471	931	88988	Bacteria	Pseudomonadota	Alphaproteobacteria	Rs-D84	Rs-D84	Enterousia	unclassified
Cow_SGB_0266	83.19	3.95	937902	984	25932	Bacteria	Pseudomonadota	Alphaproteobacteria	Rs-D84	Rs-D84	Enterousia	unclassified
Cow_SGB_0267	75.88	3.3	912949	1013	8663	Bacteria	Pseudomonadota	Alphaproteobacteria	Rs-D84	Rs-D84	Enterousia	unclassified
Cow_SGB_0268	87.81	0	924221	900	123535	Bacteria	Pseudomonadota	Alphaproteobacteria	Rs-D84	Rs-D84	Enterousia	unclassified
Cow_SGB_0269	71.32	3.3	822509	933	6863	Bacteria	Pseudomonadota	Alphaproteobacteria	Rs-D84	Rs-D84	Enterousia	unclassified
Cow_SGB_0270	80.22	0	860503	838	132415	Bacteria	Pseudomonadota	Alphaproteobacteria	Rs-D84	Rs-D84	Enterousia	unclassified
Cow_SGB_0271	83.14	0	968618	956	61055	Bacteria	Pseudomonadota	Alphaproteobacteria	Rs-D84	Rs-D84	Enterousia	unclassified
Cow_SGB_0272	83.45	0.55	872955	876	52115	Bacteria	Pseudomonadota	Alphaproteobacteria	Rs-D84	Rs-D84	Enterousia	Enterousia sp017629245
Cow_SGB_0273	76.45	0	755012	796	13230	Bacteria	Pseudomonadota	Alphaproteobacteria	Rs-D84	Rs-D84	Enterousia	unclassified
Cow_SGB_0274	73.03	1.16	939659	1060	7559	Bacteria	Pseudomonadota	Alphaproteobacteria	Rs-D84	Rs-D84	Enterousia	unclassified
Cow_SGB_0275	81.36	3.66	835804	905	12952	Bacteria	Pseudomonadota	Alphaproteobacteria	Rs-D84	Rs-D84	Enterousia	unclassified
Cow_SGB_0276	73.09	1.65	945021	990	13387	Bacteria	Pseudomonadota	Alphaproteobacteria	Rs-D84	Rs-D84	Enterousia	unclassified
Cow_SGB_0277	85.6	0	970297	968	124576	Bacteria	Pseudomonadota	Alphaproteobacteria	Rs-D84	Rs-D84	Enterousia	unclassified
Cow_SGB_0278	80.9	1.65	794821	820	16523	Bacteria	Pseudomonadota	Alphaproteobacteria	Rs-D84	Rs-D84	Enterousia	unclassified
Cow_SGB_0279	85.36	0.13	946972	954	81443	Bacteria	Pseudomonadota	Alphaproteobacteria	Rs-D84	Rs-D84	Enterousia	unclassified
Cow_SGB_0280	54.4	0.73	604818	733	3293	Bacteria	Pseudomonadota	Alphaproteobacteria	Rs-D84	Rs-D84	Enterousia	unclassified
Cow_SGB_0281	73.65	3.3	827316	955	5631	Bacteria	Pseudomonadota	Alphaproteobacteria	Rs-D84	Rs-D84	Enterousia	unclassified
Cow_SGB_0282	87.41	1.28	993456	976	60147	Bacteria	Pseudomonadota	Alphaproteobacteria	Rs-D84	Rs-D84	Enterousia	unclassified
Cow_SGB_0283	82.93	1.65	913588	951	8774	Bacteria	Pseudomonadota	Alphaproteobacteria	Rs-D84	Rs-D84	Enterousia	unclassified
Cow_SGB_0284	83.82	0.28	806168	864	23215	Bacteria	Pseudomonadota	Alphaproteobacteria	Rs-D84	Rs-D84	Enterousia	unclassified
Cow_SGB_0285	53.68	0	597160	649	5726	Bacteria	Bacillota_A	Clostridia	Christensenellales	UBA1242	Caccovivens	unclassified
Cow_SGB_0286	84.27	2.25	962603	916	90029	Bacteria	Bacillota_A	Clostridia	Christensenellales	UBA1242	RGIG8050	RGIG8050 sp016283155
Cow_SGB_0287	77.53	2.91	813390	891	7177	Bacteria	Bacillota_A	Clostridia	Christensenellales	UBA1242	RGIG8050	unclassified
Cow_SGB_0288	85.39	1.69	875710	830	92760	Bacteria	Bacillota_A	Clostridia	Christensenellales	UBA1242	RGIG8050	unclassified
Cow_SGB_0289	85.39	1.69	872614	842	270801	Bacteria	Bacillota_A	Clostridia	Christensenellales	UBA1242	RGIG8050	unclassified
Cow_SGB_0290	85.39	1.24	887115	848	572235	Bacteria	Bacillota_A	Clostridia	Christensenellales	UBA1242	RGIG8050	unclassified
Cow_SGB_0291	90.32	1.08	1034643	1013	98151	Bacteria	Pseudomonadota	Alphaproteobacteria	RF32	UBA3637	UBA3637	unclassified
Cow_SGB_0292	100	0	4753597	4536	251919	Bacteria	Bacillota_A	Clostridia	Clostridiales	Clostridiaceae	Clostridium_AO	Clostridium_AO lundense
Cow_SGB_0293	98.62	0.87	2400722	2331	103158	Bacteria	Bacillota_A	Clostridia	Clostridiales	Clostridiaceae	Clostridium_G	Clostridium_G cochlearium
Cow_SGB_0294	68.73	0.95	1102523	1250	9189	Bacteria	Bacillota_A	Clostridia	Lachnospirales	Lachnospiraceae	unclassified	unclassified
Cow_SGB_0295	96.64	0.34	1554127	1488	73470	Bacteria	Bacillota_A	Clostridia	Oscillospirales	Acutalibacteraceae	Ruminococcus_E	unclassified
Cow_SGB_0296	90.46	0.67	2190739	1855	29839	Bacteria	Bacillota_A	Clostridia	Oscillospirales	Acutalibacteraceae	Ruminococcus_E	unclassified
Cow_SGB_0297	97.09	1.34	2477262	2384	93375	Bacteria	Bacillota_A	Clostridia	Oscillospirales	Acutalibacteraceae	Ruminococcus_E	unclassified
Cow_SGB_0298	98.49	0.56	1669547	1599	29370	Bacteria	Bacillota_A	Clostridia	Oscillospirales	Acutalibacteraceae	Ruminococcus_E	unclassified
Cow_SGB_0299	98.66	0.34	2052372	1864	39435	Bacteria	Bacillota_A	Clostridia	Oscillospirales	Acutalibacteraceae	Ruminococcus_E	Ruminococcus_E bovis
Cow_SGB_0300	91.39	2.29	1655058	1693	9777	Bacteria	Bacillota_A	Clostridia	Oscillospirales	Acutalibacteraceae	Ruminococcus_E	unclassified
Cow_SGB_0301	78.73	2.68	1427805	1655	4902	Bacteria	Bacillota_A	Clostridia	UMGS1883	UMGS1540	SIG447	unclassified
Cow_SGB_0302	90.25	3.83	1278372	1487	5412	Bacteria	Bacillota_A	Clostridia	UMGS1883	UMGS1540	SIG447	unclassified
Cow_SGB_0303	79.11	4.13	1314801	1296	7777	Bacteria	Bacillota_A	Clostridia	Oscillospirales	CAG-382	SIG622	unclassified
Cow_SGB_0304	91.4	0	997937	997	30333	Bacteria	Pseudomonadota	Alphaproteobacteria	RF32	UBA3637	UBA3637	unclassified
Cow_SGB_0305	70.69	0	1063552	1170	10099	Bacteria	Pseudomonadota	Alphaproteobacteria	RF32	UBA3637	UBA3637	unclassified
Cow_SGB_0306	84.81	0	970388	978	28710	Bacteria	Pseudomonadota	Alphaproteobacteria	RF32	UBA3637	UBA3637	UBA3637 sp017650375
Cow_SGB_0307	81.6	2.15	876306	903	22293	Bacteria	Pseudomonadota	Alphaproteobacteria	RF32	UBA3637	UBA3637	unclassified
Cow_SGB_0308	86.69	0.54	1030896	1068	13873	Bacteria	Pseudomonadota	Alphaproteobacteria	RF32	UBA3637	unclassified	unclassified
Cow_SGB_0309	91.21	1.1	1553890	1559	11129	Bacteria	Pseudomonadota	Alphaproteobacteria	RF32	UBA3637	RGIG4140	unclassified
Cow_SGB_0310	90.66	0.55	1716505	1688	10064	Bacteria	Pseudomonadota	Alphaproteobacteria	RF32	UBA3637	RGIG4140	unclassified
Cow_SGB_0311	95.6	0	1569393	1419	69274	Bacteria	Pseudomonadota	Alphaproteobacteria	RF32	UBA3637	RGIG4140	unclassified
Cow_SGB_0312	94.51	0.1	1597136	1490	175402	Bacteria	Pseudomonadota	Alphaproteobacteria	RF32	UBA3637	RGIG4140	unclassified
Cow_SGB_0313	87.21	1.33	1208279	1327	10491	Bacteria	Pseudomonadota	Alphaproteobacteria	RF32	UBA3637	UBA7488	unclassified
Cow_SGB_0314	83.85	1.61	1279758	1322	14260	Bacteria	Pseudomonadota	Alphaproteobacteria	RF32	UBA3637	UBA7488	unclassified
Cow_SGB_0315	63.51	0.05	1388282	1338	79181	Bacteria	Pseudomonadota	Alphaproteobacteria	RF32	UBA3637	UBA7488	unclassified
Cow_SGB_0316	88.71	2.56	1154020	1227	12937	Bacteria	Pseudomonadota	Alphaproteobacteria	RF32	UBA3637	RGIG7089	unclassified
Cow_SGB_0317	80.64	2.31	1091946	1128	13562	Bacteria	Pseudomonadota	Alphaproteobacteria	RF32	UBA3637	RGIG7089	unclassified
Cow_SGB_0318	93.41	1.1	1156098	1093	35277	Bacteria	Pseudomonadota	Alphaproteobacteria	RF32	UBA3637	CALXZG01	unclassified
Cow_SGB_0319	92.31	0	1139465	1170	15335	Bacteria	Pseudomonadota	Alphaproteobacteria	RF32	UBA3637	CALXZG01	unclassified
Cow_SGB_0320	94.51	0.1	1180243	1141	49518	Bacteria	Pseudomonadota	Alphaproteobacteria	RF32	UBA3637	CALXZG01	unclassified
Cow_SGB_0321	89.25	0	1178353	1150	155601	Bacteria	Pseudomonadota	Alphaproteobacteria	RF32	UBA3637	UBA3637	unclassified
Cow_SGB_0322	82.56	0.54	935553	1044	6949	Bacteria	Pseudomonadota	Alphaproteobacteria	RF32	UBA3637	UBA3637	unclassified
Cow_SGB_0323	84.95	0	1062114	1036	97762	Bacteria	Pseudomonadota	Alphaproteobacteria	RF32	UBA3637	UBA3637	unclassified
Cow_SGB_0324	93.34	0.1	1194516	1294	12461	Bacteria	Pseudomonadota	Alphaproteobacteria	RF32	UBA3637	RGIG7089	unclassified
Cow_SGB_0325	92.31	3.3	1155545	1237	11372	Bacteria	Pseudomonadota	Alphaproteobacteria	RF32	UBA3637	RGIG7089	unclassified
Cow_SGB_0326	85.71	5.97	1314021	1504	6828	Bacteria	Pseudomonadota	Alphaproteobacteria	RF32	UBA3637	RGIG7089	unclassified
Cow_SGB_0327	90.01	0.4	1039808	1111	13886	Bacteria	Pseudomonadota	Alphaproteobacteria	RF32	UBA3637	RGIG7089	unclassified
Cow_SGB_0328	54.91	0	808851	996	3726	Bacteria	Pseudomonadota	Alphaproteobacteria	RF32	UBA3637	RGIG7089	unclassified
Cow_SGB_0329	93.55	0	1266290	1238	54974	Bacteria	Pseudomonadota	Alphaproteobacteria	RF32	UBA3637	RGIG7089	unclassified
Cow_SGB_0330	57.04	0	763528	869	4238	Bacteria	Pseudomonadota	Alphaproteobacteria	RF32	UBA3637	RGIG7089	unclassified
Cow_SGB_0331	93.05	0.54	1500766	1589	15516	Bacteria	Pseudomonadota	Alphaproteobacteria	RF32	CAG-239	JAFUYI01	JAFUYI01 sp017546885
Cow_SGB_0332	91.64	0.36	1486843	1727	5104	Bacteria	Pseudomonadota	Alphaproteobacteria	RF32	CAG-239	JAFUYI01	unclassified
Cow_SGB_0333	85.39	1.08	1309599	1325	15436	Bacteria	Pseudomonadota	Alphaproteobacteria	RF32	CAG-239	JAFUYI01	unclassified
Cow_SGB_0334	92.28	1.24	1472104	1484	37695	Bacteria	Pseudomonadota	Alphaproteobacteria	RF32	CAG-239	JAFUYI01	JAFUYI01 sp016288295
Cow_SGB_0335	97.85	0	1427246	1421	72383	Bacteria	Pseudomonadota	Alphaproteobacteria	RF32	CAG-239	JAFUYI01	JAFUYI01 sp902761715
Cow_SGB_0336	89.01	0	1101635	1182	8592	Bacteria	Pseudomonadota	Alphaproteobacteria	RF32	CAG-239	JAFUYI01	JAFUYI01 sp902795665
Cow_SGB_0337	83.66	3.36	1620919	1670	23821	Bacteria	Pseudomonadota	Alphaproteobacteria	RF32	CAG-239	unclassified	unclassified
Cow_SGB_0338	81.14	3.66	1355806	1445	7044	Bacteria	Pseudomonadota	Alphaproteobacteria	RF32	CAG-239	CAG-267	unclassified
Cow_SGB_0339	79.93	3.23	1304603	1351	8157	Bacteria	Pseudomonadota	Alphaproteobacteria	RF32	CAG-239	unclassified	unclassified
Cow_SGB_0340	92.77	1.08	1579724	1486	94442	Bacteria	Pseudomonadota	Alphaproteobacteria	RF32	CAG-239	CAG-267	unclassified
Cow_SGB_0341	88.95	1.53	1449203	1525	10253	Bacteria	Pseudomonadota	Alphaproteobacteria	RF32	CAG-239	CAG-267	unclassified
Cow_SGB_0342	87.59	1.08	1391346	1338	43570	Bacteria	Pseudomonadota	Alphaproteobacteria	RF32	CAG-239	CAG-267	unclassified
Cow_SGB_0343	91.31	1.1	1587812	1511	36758	Bacteria	Pseudomonadota	Alphaproteobacteria	RF32	CAG-239	CAG-267	unclassified
Cow_SGB_0344	91.58	2.46	1742366	1735	13822	Bacteria	Pseudomonadota	Alphaproteobacteria	RF32	CAG-239	CAG-267	CAG-267 sp017465945
Cow_SGB_0345	92.11	0.55	1677289	1558	41245	Bacteria	Pseudomonadota	Alphaproteobacteria	RF32	CAG-239	CAG-267	unclassified
Cow_SGB_0346	94.62	0	1576632	1444	120889	Bacteria	Pseudomonadota	Alphaproteobacteria	RF32	CAG-239	CAG-267	CAG-267 sp902763185
Cow_SGB_0347	83.28	3.11	1104777	1117	8586	Bacteria	Pseudomonadota	Alphaproteobacteria	RF32	CAG-239	JAFTYO01	unclassified
Cow_SGB_0348	94.51	1.3	1440535	1413	53783	Bacteria	Pseudomonadota	Alphaproteobacteria	RF32	CAG-239	JAFTYO01	unclassified
Cow_SGB_0349	96.7	0	1576530	1530	78521	Bacteria	Pseudomonadota	Alphaproteobacteria	RF32	CAG-239	JAFTYO01	unclassified
Cow_SGB_0350	94.62	1.27	1567576	1508	46943	Bacteria	Pseudomonadota	Alphaproteobacteria	RF32	CAG-239	JAFTYO01	unclassified
Cow_SGB_0351	62.52	1.1	962792	1091	4861	Bacteria	Pseudomonadota	Alphaproteobacteria	RF32	CAG-239	JAFTYO01	unclassified
Cow_SGB_0352	91.94	1.14	1519476	1559	26926	Bacteria	Pseudomonadota	Alphaproteobacteria	RF32	CAG-239	RUG410	unclassified
Cow_SGB_0353	74.79	3.23	1325373	1372	12324	Bacteria	Pseudomonadota	Alphaproteobacteria	RF32	CAG-239	unclassified	unclassified
Cow_SGB_0354	94.89	1.1	1395579	1316	21554	Bacteria	Pseudomonadota	Alphaproteobacteria	RF32	CAG-239	UBA1254	unclassified
Cow_SGB_0355	92.68	1.1	1461706	1434	26883	Bacteria	Pseudomonadota	Alphaproteobacteria	RF32	CAG-239	UBA1254	UBA1254 sp902785935
Cow_SGB_0356	90.11	0.18	1218664	1283	6956	Bacteria	Pseudomonadota	Alphaproteobacteria	RF32	CAG-239	UBA1254	UBA1254 sp902767055
Cow_SGB_0357	82.55	1.08	1240254	1420	7392	Bacteria	Pseudomonadota	Alphaproteobacteria	RF32	CAG-239	UBA1254	UBA1254 sp900313355
Cow_SGB_0358	93.55	2.15	1304574	1308	21521	Bacteria	Pseudomonadota	Alphaproteobacteria	RF32	CAG-239	UBA1254	UBA1254 sp002308495
Cow_SGB_0359	90.26	3.23	1218535	1240	14181	Bacteria	Pseudomonadota	Alphaproteobacteria	RF32	CAG-239	UBA1254	UBA1254 sp902797315
Cow_SGB_0360	82.7	1.1	1150199	1208	9148	Bacteria	Pseudomonadota	Alphaproteobacteria	RF32	CAG-239	UBA1254	unclassified
Cow_SGB_0361	94.31	0	1439206	1408	85550	Bacteria	Pseudomonadota	Alphaproteobacteria	RF32	CAG-239	CAZU01	CAZU01 sp902761535
Cow_SGB_0362	98.92	1.08	1516081	1516	174414	Bacteria	Pseudomonadota	Alphaproteobacteria	RF32	CAG-239	CAZU01	CAZU01 sp902763535
Cow_SGB_0363	98.92	1.08	1507260	1492	263993	Bacteria	Pseudomonadota	Alphaproteobacteria	RF32	CAG-239	CAZU01	CAZU01 sp902799835
Cow_SGB_0364	72.21	5.38	852600	1063	2716	Bacteria	Pseudomonadota	Alphaproteobacteria	RF32	CAG-239	CAZU01	unclassified
Cow_SGB_0365	55.85	0	868356	1003	3903	Bacteria	Pseudomonadota	Alphaproteobacteria	RF32	CAG-239	CAZU01	unclassified
Cow_SGB_0366	89.33	6.55	1421938	1412	28061	Bacteria	Pseudomonadota	Alphaproteobacteria	RF32	CAG-239	CAZU01	CAZU01 sp015062585
Cow_SGB_0367	98.92	3.63	1480376	1500	29195	Bacteria	Pseudomonadota	Alphaproteobacteria	RF32	CAG-239	CAZU01	unclassified
Cow_SGB_0368	58.15	0	857885	937	5252	Bacteria	Pseudomonadota	Alphaproteobacteria	RF32	CAG-239	CAZU01	unclassified
Cow_SGB_0369	68.8	0.39	1022309	1245	3369	Bacteria	Pseudomonadota	Alphaproteobacteria	RF32	CAG-239	CAZU01	unclassified
Cow_SGB_0370	95.7	1.08	1384651	1354	189886	Bacteria	Pseudomonadota	Alphaproteobacteria	RF32	CAG-239	CAZU01	unclassified
Cow_SGB_0371	94.5	1.08	1465114	1548	22380	Bacteria	Pseudomonadota	Alphaproteobacteria	RF32	CAG-239	CAZU01	unclassified
Cow_SGB_0372	97.8	1.79	1669597	1682	65136	Bacteria	Pseudomonadota	Alphaproteobacteria	RF32	CAG-239	CAZU01	unclassified
Cow_SGB_0373	83.38	1.37	1263197	1329	10435	Bacteria	Pseudomonadota	Alphaproteobacteria	RF32	CAG-239	CAZU01	unclassified
Cow_SGB_0374	93.55	0	1527412	1564	17686	Bacteria	Pseudomonadota	Alphaproteobacteria	RF32	CAG-239	JAGAJR01	JAGAJR01 sp017626035
Cow_SGB_0375	97.79	1.08	1473777	1454	38440	Bacteria	Pseudomonadota	Alphaproteobacteria	RF32	CAG-239	CAZU01	unclassified
Cow_SGB_0376	98.92	0.93	1903534	1959	45980	Bacteria	Pseudomonadota	Alphaproteobacteria	RF32	CAG-239	CAZU01	CAZU01 sp000432275
Cow_SGB_0377	93.32	1.08	1659644	1680	37103	Bacteria	Pseudomonadota	Alphaproteobacteria	RF32	CAG-239	CAJLXD01	unclassified
Cow_SGB_0378	96.24	3.52	1397747	1531	8901	Bacteria	Pseudomonadota	Alphaproteobacteria	RF32	CAG-239	MGBC133411	unclassified
Cow_SGB_0379	93.55	1.43	1789275	1664	56459	Bacteria	Pseudomonadota	Alphaproteobacteria	RF32	CAG-239	RUG410	unclassified
Cow_SGB_0380	95.53	4.08	1569550	1617	22359	Bacteria	Cyanobacteriota	Vampirovibrionia	Gastranaerophilales	Gastranaerophilaceae	RUG14219	RUG14219 sp902796925
Cow_SGB_0381	77.53	1.94	3222354	2751	27950	Bacteria	Myxococcota	XYA12-FULL-58-9	JAEEML01	JAEEML01	JAEEML01	JAEEML01 sp016283195
Cow_SGB_0382	50.88	0	682016	817	3006	Bacteria	Pseudomonadota	Alphaproteobacteria	RF32	CAG-239	CAZU01	unclassified
Cow_SGB_0383	60.83	1.61	967915	1219	2898	Bacteria	Pseudomonadota	Alphaproteobacteria	RF32	CAG-239	Scatocola	unclassified
Cow_SGB_0384	86.02	0.39	1403135	1411	53270	Bacteria	Pseudomonadota	Alphaproteobacteria	RF32	CAG-239	Scatocola	unclassified
Cow_SGB_0385	91.25	4.3	1229179	1248	14231	Bacteria	Pseudomonadota	Alphaproteobacteria	RF32	CAG-239	RUG410	RUG410 sp900318605
Cow_SGB_0386	86.8	0	1219800	1252	10489	Bacteria	Pseudomonadota	Alphaproteobacteria	RF32	CAG-239	RUG410	RUG410 sp902796625
Cow_SGB_0387	90.2	2.15	1190005	1214	10942	Bacteria	Pseudomonadota	Alphaproteobacteria	RF32	CAG-239	RUG410	RUG410 sp902795745
Cow_SGB_0388	86.25	0	1172533	1211	11438	Bacteria	Pseudomonadota	Alphaproteobacteria	RF32	CAG-239	RUG410	RUG410 sp900320035
Cow_SGB_0389	86.82	0	1475568	1502	39508	Bacteria	Pseudomonadota	Alphaproteobacteria	RF32	CAG-239	Scatocola	Scatocola sp902778645
Cow_SGB_0390	92.47	0	1522945	1515	32296	Bacteria	Pseudomonadota	Alphaproteobacteria	RF32	CAG-239	RUG410	RUG410 sp900313185
Cow_SGB_0391	86.02	0.48	1646829	1545	39934	Bacteria	Pseudomonadota	Alphaproteobacteria	RF32	CAG-239	RUG410	RUG410 sp016283295
Cow_SGB_0392	94.62	0	2005265	1949	65374	Bacteria	Pseudomonadota	Alphaproteobacteria	RF32	CAG-239	RUG410	unclassified
Cow_SGB_0393	83.33	0.36	1529946	1499	30576	Bacteria	Pseudomonadota	Alphaproteobacteria	RF32	CAG-239	RUG410	RUG410 sp902763905
Cow_SGB_0394	91.84	0	1553181	1486	51507	Bacteria	Pseudomonadota	Alphaproteobacteria	RF32	CAG-239	RUG410	RUG410 sp902793695
Cow_SGB_0395	94.62	0	1587159	1504	144001	Bacteria	Pseudomonadota	Alphaproteobacteria	RF32	CAG-239	RUG410	RUG410 sp902788365
Cow_SGB_0396	93.01	0	1340615	1364	13973	Bacteria	Pseudomonadota	Alphaproteobacteria	RF32	CAG-239	RUG410	unclassified
Cow_SGB_0397	82.54	0	1152559	1224	7522	Bacteria	Pseudomonadota	Alphaproteobacteria	RF32	CAG-239	RUG410	RUG410 sp900313155
Cow_SGB_0398	92.47	0.36	1473697	1411	92541	Bacteria	Pseudomonadota	Alphaproteobacteria	RF32	CAG-239	RUG410	RUG410 sp902763155
Cow_SGB_0399	85.89	2.08	2062713	2144	10293	Bacteria	Pseudomonadota	Gammaproteobacteria	Pseudomonadales	Pseudomonadaceae	Thiopseudomonas	Thiopseudomonas sp012800475
Cow_SGB_0400	96.65	1.39	1805698	1966	7485	Bacteria	Pseudomonadota	Gammaproteobacteria	Thiomicrospirales	Thiomicrospiraceae	Thiomicrorhabdus	unclassified
Cow_SGB_0401	97.09	0.22	2187638	1923	107604	Bacteria	Bacillota_A	Clostridia	Oscillospirales	Acutalibacteraceae	CAG-488	unclassified
Cow_SGB_0402	96.96	5.33	4119790	4291	29791	Bacteria	Bacillota	Bacilli	Bacillales	DSM-1321	Bacillus_AD	unclassified
Cow_SGB_0403	91.14	1.91	5035345	4976	53952	Bacteria	Bacillota	Bacilli	Bacillales	DSM-18226	Niallia	Niallia sp001076885
Cow_SGB_0404	95.81	2.69	3633802	3700	24205	Bacteria	Bacillota	Bacilli	Bacillales	DSM-1321	Bacillus_AD	unclassified
Cow_SGB_0405	99.34	0.72	5796785	5921	322207	Bacteria	Bacillota	Bacilli	Bacillales	Bacillaceae_G	Bacillus_A	Bacillus_A wiedmannii
Cow_SGB_0406	99.34	1.71	3768640	3918	41527	Bacteria	Bacillota	Bacilli	Bacillales	Planococcaceae	Kurthia	Kurthia intestinigallinarum
Cow_SGB_0407	99.94	0.39	2328430	1968	18352	Bacteria	Pseudomonadota	Gammaproteobacteria	Enterobacterales_A	Succinivibrionaceae	HGM20899	HGM20899 sp900767005
Cow_SGB_0408	73.62	1.46	2250679	2541	4856	Bacteria	Bacillota	Bacilli	Bacillales	DSM-18226	Cytobacillus	unclassified
Cow_SGB_0409	94.4	5.46	3305205	3398	9553	Bacteria	Bacillota	Bacilli	Bacillales	Caldibacillaceae	RUG14133	RUG14133 sp902796085
Cow_SGB_0410	83.97	6.71	2854950	3384	4306	Bacteria	Bacillota	Bacilli	Bacillales	DSM-1321	Pradoshia	Pradoshia eiseniae
Cow_SGB_0411	62.2	1.88	2417179	2687	5531	Bacteria	Bacillota	Bacilli	Bacillales	Planococcaceae	Planococcus	Planococcus wigleyi
Cow_SGB_0412	99.55	0.14	3007925	2796	99114	Bacteria	Pseudomonadota	Gammaproteobacteria	Pseudomonadales	Moraxellaceae	Acinetobacter	Acinetobacter pecorum
Cow_SGB_0413	92.88	1.55	2621481	2591	20595	Bacteria	Pseudomonadota	Gammaproteobacteria	Pseudomonadales	Moraxellaceae	Acinetobacter	unclassified
Cow_SGB_0414	97.91	2.61	2765162	2633	64644	Bacteria	Pseudomonadota	Gammaproteobacteria	Pseudomonadales	Moraxellaceae	Acinetobacter	unclassified
Cow_SGB_0415	100	0.14	3051278	2870	177695	Bacteria	Pseudomonadota	Gammaproteobacteria	Pseudomonadales	Moraxellaceae	Acinetobacter	Acinetobacter sp000632455
Cow_SGB_0416	98.11	1.79	3494199	3077	13025	Bacteria	Pseudomonadota	Gammaproteobacteria	Pseudomonadales	Moraxellaceae	Acinetobacter	unclassified
Cow_SGB_0417	87.01	3.59	2019672	2131	7773	Bacteria	Pseudomonadota	Gammaproteobacteria	Pseudomonadales	Moraxellaceae	Acinetobacter	Acinetobacter sp012371325
Cow_SGB_0418	98.96	1.94	2654101	2586	29946	Bacteria	Pseudomonadota	Gammaproteobacteria	Pseudomonadales	Moraxellaceae	Acinetobacter	unclassified
Cow_SGB_0419	66.72	0	2044437	2269	4717	Bacteria	Pseudomonadota	Gammaproteobacteria	Pseudomonadales	Moraxellaceae	Acinetobacter	Acinetobacter sp009707625
Cow_SGB_0420	70.86	3.45	2031021	2200	6153	Bacteria	Pseudomonadota	Gammaproteobacteria	Pseudomonadales	Moraxellaceae	Acinetobacter	unclassified
Cow_SGB_0421	63.61	0	2030849	2465	2736	Bacteria	Bacillota	Bacilli	Bacillales	Planococcaceae	Solibacillus	unclassified
Cow_SGB_0422	79.29	5.74	3097678	3479	5826	Bacteria	Bacillota	Bacilli	Bacillales	Planococcaceae	Solibacillus	unclassified
Cow_SGB_0423	94.61	5.01	2836103	3029	8325	Bacteria	Bacillota	Bacilli	Bacillales	Planococcaceae	Lysinibacillus_B	unclassified
Cow_SGB_0424	75.44	0	2168524	2591	2707	Bacteria	Bacillota	Bacilli	Bacillales	Planococcaceae	Lysinibacillus_B	unclassified
Cow_SGB_0425	94.91	0.79	1102757	1043	31066	Bacteria	Chlamydiota	Chlamydiia	Chlamydiales	Chlamydiaceae	Chlamydophila	Chlamydophila pecorum
Cow_SGB_0426	62.76	0	3052438	2684	9527	Bacteria	Fibrobacterota	Fibrobacteria	Fibrobacterales	Fibrobacteraceae	Fibrobacter	unclassified
Cow_SGB_0427	87.13	2.2	4274815	3591	70954	Bacteria	Fibrobacterota	Fibrobacteria	Fibrobacterales	Fibrobacteraceae	Fibrobacter	Fibrobacter succinogenes_H
Cow_SGB_0428	85.81	2.2	3922066	3284	63370	Bacteria	Fibrobacterota	Fibrobacteria	Fibrobacterales	Fibrobacteraceae	Fibrobacter	Fibrobacter succinogenes_N
Cow_SGB_0429	95.09	1.1	4094377	3431	105732	Bacteria	Fibrobacterota	Fibrobacteria	Fibrobacterales	Fibrobacteraceae	Fibrobacter	Fibrobacter succinogenes_F
Cow_SGB_0430	96.84	0	3533533	2912	165144	Bacteria	Fibrobacterota	Fibrobacteria	Fibrobacterales	Fibrobacteraceae	Fibrobacter	Fibrobacter sp002210345
Cow_SGB_0431	90.14	0	3143910	2803	28130	Bacteria	Fibrobacterota	Fibrobacteria	Fibrobacterales	Fibrobacteraceae	Fibrobacter	Fibrobacter sp900215325
Cow_SGB_0432	100	1.1	3511778	2894	828402	Bacteria	Fibrobacterota	Fibrobacteria	Fibrobacterales	Fibrobacteraceae	Fibrobacter	Fibrobacter elongatus
Cow_SGB_0433	80.69	0	3864690	3350	80462	Bacteria	Fibrobacterota	Fibrobacteria	Fibrobacterales	Fibrobacteraceae	Fibrobacter	Fibrobacter succinogenes_J
Cow_SGB_0434	92.58	4.31	3876278	3284	94160	Bacteria	Fibrobacterota	Fibrobacteria	Fibrobacterales	Fibrobacteraceae	Fibrobacter	Fibrobacter succinogenes_K
Cow_SGB_0435	92.91	1.1	3934885	3251	73112	Bacteria	Fibrobacterota	Fibrobacteria	Fibrobacterales	Fibrobacteraceae	Fibrobacter	Fibrobacter succinogenes_E
Cow_SGB_0436	87.76	5.99	3032812	2802	28774	Bacteria	Fibrobacterota	Fibrobacteria	Fibrobacterales	Fibrobacteraceae	Fibrobacter	Fibrobacter sp900141705
Cow_SGB_0437	93.41	0	3043683	2616	76032	Bacteria	Fibrobacterota	Fibrobacteria	Fibrobacterales	Fibrobacteraceae	Fibrobacter	Fibrobacter sp900313675
Cow_SGB_0438	93.84	2.21	2838150	2513	42746	Bacteria	Fibrobacterota	Fibrobacteria	Fibrobacterales	Fibrobacteraceae	Fibrobacter	Fibrobacter succinogenes_L
Cow_SGB_0439	84.37	2.2	2210579	2170	10423	Bacteria	Fibrobacterota	Fibrobacteria	Fibrobacterales	Fibrobacteraceae	Fibrobacter	Fibrobacter succinogenes_G
Cow_SGB_0440	89.79	3.11	2530778	2326	20776	Bacteria	Fibrobacterota	Fibrobacteria	Fibrobacterales	Fibrobacteraceae	Fibrobacter	Fibrobacter succinogenes_D
Cow_SGB_0441	94.51	0	3357451	2700	238430	Bacteria	Fibrobacterota	Fibrobacteria	Fibrobacterales	Fibrobacteraceae	Fibrobacter	Fibrobacter sp900142495
Cow_SGB_0442	95.6	1.1	3148055	2549	97399	Bacteria	Fibrobacterota	Fibrobacteria	Fibrobacterales	Fibrobacteraceae	Fibrobacter	Fibrobacter sp900316465
Cow_SGB_0443	92.34	0.55	3318252	2820	84841	Bacteria	Fibrobacterota	Fibrobacteria	Fibrobacterales	Fibrobacteraceae	Fibrobacter	Fibrobacter succinogenes_O
Cow_SGB_0444	84.39	1.1	2988096	2450	76454	Bacteria	Fibrobacterota	Fibrobacteria	Fibrobacterales	Fibrobacteraceae	Fibrobacter	Fibrobacter succinogenes_Q
Cow_SGB_0445	82.21	1.72	3043414	2578	72104	Bacteria	Fibrobacterota	Fibrobacteria	Fibrobacterales	Fibrobacteraceae	Fibrobacter	Fibrobacter succinogenes_M
Cow_SGB_0446	81.71	6.9	3259213	2772	37179	Bacteria	Fibrobacterota	Fibrobacteria	Fibrobacterales	Fibrobacteraceae	Fibrobacter	unclassified
Cow_SGB_0447	83.65	8.24	3439765	2856	41898	Bacteria	Fibrobacterota	Fibrobacteria	Fibrobacterales	Fibrobacteraceae	Fibrobacter	Fibrobacter sp017412605
Cow_SGB_0448	81.77	3.3	3496761	3008	27156	Bacteria	Fibrobacterota	Fibrobacteria	Fibrobacterales	Fibrobacteraceae	Fibrobacter	Fibrobacter sp016285835
Cow_SGB_0449	52.06	3.3	1966020	1856	6619	Bacteria	Fibrobacterota	Fibrobacteria	Fibrobacterales	Fibrobacteraceae	Fibrobacter	unclassified
Cow_SGB_0450	83.39	2.2	2910425	2627	20730	Bacteria	Fibrobacterota	Fibrobacteria	Fibrobacterales	Fibrobacteraceae	Fibrobacter	Fibrobacter succinogenes_A
Cow_SGB_0451	82.42	2.75	2734716	2681	10186	Bacteria	Fibrobacterota	Fibrobacteria	Fibrobacterales	Fibrobacteraceae	Fibrobacter	Fibrobacter succinogenes_P
Cow_SGB_0452	58.28	4.56	1433096	1500	5368	Bacteria	Fibrobacterota	Fibrobacteria	Fibrobacterales	Fibrobacteraceae	Fibrobacter	Fibrobacter succinogenes_P
Cow_SGB_0453	86.07	1.65	2759641	2406	42181	Bacteria	Fibrobacterota	Fibrobacteria	Fibrobacterales	Fibrobacteraceae	Fibrobacter	Fibrobacter sp002210285
Cow_SGB_0454	94.35	1.1	3459399	3012	37502	Bacteria	Fibrobacterota	Fibrobacteria	Fibrobacterales	Fibrobacteraceae	Fibrobacter	Fibrobacter succinogenes_C
Cow_SGB_0455	82.41	0	3595016	3011	115706	Bacteria	Fibrobacterota	Fibrobacteria	Fibrobacterales	Fibrobacteraceae	Fibrobacter	Fibrobacter succinogenes_I
Cow_SGB_0456	87.94	1.1	3150393	2592	86732	Bacteria	Fibrobacterota	Fibrobacteria	Fibrobacterales	Fibrobacteraceae	Fibrobacter	Fibrobacter succinogenes_B
Cow_SGB_0457	81.32	2.38	2683552	2320	44082	Bacteria	Fibrobacterota	Fibrobacteria	Fibrobacterales	Fibrobacteraceae	Fibrobacter	Fibrobacter sp002449765
Cow_SGB_0458	52.7	6.04	1495011	1453	7634	Bacteria	Fibrobacterota	Fibrobacteria	Fibrobacterales	Fibrobacteraceae	Fibrobacter	unclassified
Cow_SGB_0459	93.84	0	2726114	2622	9030	Bacteria	Fibrobacterota	Fibrobacteria	Fibrobacterales	Fibrobacteraceae	Hallerella	Hallerella intestinalis
Cow_SGB_0460	91.95	0	2467306	2154	45507	Bacteria	Fibrobacterota	Fibrobacteria	Fibrobacterales	Fibrobacteraceae	Hallerella	Hallerella porci
Cow_SGB_0461	100	0	2881824	2634	72599	Bacteria	Fibrobacterota	Fibrobacteria	Fibrobacterales	Fibrobacteraceae	Hallerella	Hallerella succinigenes
Cow_SGB_0462	97.8	0	2608007	2287	108049	Bacteria	Fibrobacterota	Fibrobacteria	Fibrobacterales	Fibrobacteraceae	Hallerella	Hallerella sp002390045
Cow_SGB_0463	70.36	4.54	1068949	1182	3961	Bacteria	Bacillota	Bacilli	RFN20	CAG-288	Scatoplasma	unclassified
Cow_SGB_0464	93.24	0	2334311	2266	17413	Bacteria	Bacillota_C	Negativicutes	Selenomonadales	Selenomonadaceae	Quinella	unclassified
Cow_SGB_0465	89.69	1.12	1209202	1259	22696	Bacteria	Bacillota	Bacilli	RFN20	DUOF01	RGIG6178	unclassified
Cow_SGB_0466	93.26	0.16	1241791	1363	16306	Bacteria	Bacillota	Bacilli	RFN20	DUOF01	RGIG6178	unclassified
Cow_SGB_0467	70.18	1.75	1283568	1562	8285	Bacteria	Bacillota	Bacilli	RFN20	DUOF01	RGIG6178	unclassified
Cow_SGB_0468	53.76	0	937554	1062	7667	Bacteria	Bacillota	Bacilli	RFN20	DUOF01	RGIG6178	unclassified
Cow_SGB_0469	89.4	2.3	1109476	1147	14728	Bacteria	Bacillota	Bacilli	RFN20	DUOF01	RGIG6178	unclassified
Cow_SGB_0470	96.77	1.08	1995198	1986	19344	Bacteria	Bacteroidota	Bacteroidia	Flavobacteriales	Weeksellaceae	Ap0902	unclassified
Cow_SGB_0471	97.67	0.54	2135758	2032	22211	Bacteria	Bacteroidota	Bacteroidia	Flavobacteriales	Weeksellaceae	Ap0902	unclassified
Cow_SGB_0472	95.16	2.51	2290396	2454	8099	Bacteria	Bacteroidota	Bacteroidia	Flavobacteriales	Weeksellaceae	Moheibacter	unclassified
Cow_SGB_0473	96.64	0	2484877	2155	54964	Bacteria	Fibrobacterota	Fibrobacteria	Fibrobacterales	Fibrobacteraceae	UBA1765	UBA1765 sp017625775
Cow_SGB_0474	97.74	0	2406004	2036	180330	Bacteria	Fibrobacterota	Fibrobacteria	Fibrobacterales	Fibrobacteraceae	UBA1765	UBA1765 sp017631885
Cow_SGB_0475	83.41	1.68	2077059	1819	7814	Bacteria	Bacillota_A	Clostridia	Oscillospirales	Acutalibacteraceae	RUG14223	RUG14223 sp902796955
Cow_SGB_0476	97.32	0.89	1705916	1735	35567	Bacteria	Bacillota_A	Clostridia	Oscillospirales	Ruminococcaceae	RGIG4131	RGIG4131 sp017536405
Cow_SGB_0477	95.75	1.4	2857513	2734	19373	Bacteria	Spirochaetota	Spirochaetia	Treponematales	Treponemataceae	Treponema_D	unclassified
Cow_SGB_0478	95.93	0.5	2024747	1930	31719	Bacteria	Bacillota_A	Clostridia	Lachnospirales	Lachnospiraceae	RGIG1934	unclassified
Cow_SGB_0479	92.12	2.1	2895929	2786	11290	Bacteria	Spirochaetota	Spirochaetia	Treponematales	Treponemataceae	Treponema_D	Treponema_D sp017449265
Cow_SGB_0480	84.61	1.27	1827585	1738	30656	Bacteria	Spirochaetota	Spirochaetia	Sphaerochaetales	Sphaerochaetaceae	UBA9732	UBA9732 sp900321635
Cow_SGB_0481	81.15	0	1633141	1580	10764	Bacteria	Spirochaetota	Spirochaetia	Sphaerochaetales	Sphaerochaetaceae	UBA9732	UBA9732 sp902796335
Cow_SGB_0482	78.52	9.18	1890064	1900	10407	Bacteria	Spirochaetota	Spirochaetia	Sphaerochaetales	Sphaerochaetaceae	UBA9732	unclassified
Cow_SGB_0483	93.11	1.91	2207687	2258	13248	Bacteria	Spirochaetota	Spirochaetia	Sphaerochaetales	Sphaerochaetaceae	UBA9732	UBA9732 sp902781545
Cow_SGB_0484	50.73	9.26	1252024	1612	2168	Bacteria	Spirochaetota	Spirochaetia	Sphaerochaetales	Sphaerochaetaceae	UBA9732	unclassified
Cow_SGB_0485	81.25	1.14	2090570	2041	21089	Bacteria	Spirochaetota	Spirochaetia	Sphaerochaetales	Sphaerochaetaceae	UBA9732	unclassified
Cow_SGB_0486	79.48	1.14	1833348	1793	26492	Bacteria	Spirochaetota	Spirochaetia	Sphaerochaetales	Sphaerochaetaceae	UBA9732	unclassified
Cow_SGB_0487	99.98	0	3171937	2631	66821	Bacteria	Spirochaetota	Spirochaetia	Treponematales	Treponemataceae	Treponema_D	Treponema_D saccharophilum
Cow_SGB_0488	77.91	1.4	2231451	2360	3777	Bacteria	Spirochaetota	Spirochaetia	Treponematales	Treponemataceae	Treponema_D	unclassified
Cow_SGB_0489	80.56	3.85	2694055	2731	5982	Bacteria	Spirochaetota	Spirochaetia	Treponematales	Treponemataceae	Treponema_D	Treponema_D sp902773215
Cow_SGB_0490	80.77	0.92	2280380	2218	6420	Bacteria	Spirochaetota	Spirochaetia	Treponematales	Treponemataceae	Treponema_D	Treponema_D sp902796985
Cow_SGB_0491	57.13	3.47	1701424	2014	2633	Bacteria	Spirochaetota	Spirochaetia	Treponematales	Treponemataceae	Treponema_D	unclassified
Cow_SGB_0492	94.26	1.4	2524523	2327	17813	Bacteria	Spirochaetota	Spirochaetia	Treponematales	Treponemataceae	Treponema_D	Treponema_D sp902797055
Cow_SGB_0493	83.62	7.44	2823487	2951	6334	Bacteria	Spirochaetota	Spirochaetia	Treponematales	Treponemataceae	Treponema_D	unclassified
Cow_SGB_0494	97.03	1.48	2767202	2576	27191	Bacteria	Spirochaetota	Spirochaetia	Treponematales	Treponemataceae	Treponema_D	Treponema_D sp902792795
Cow_SGB_0495	97.2	2.56	2552115	2386	27844	Bacteria	Spirochaetota	Spirochaetia	Treponematales	Treponemataceae	Treponema_D	Treponema_D sp902799965
Cow_SGB_0496	99.3	0	2950199	2569	256018	Bacteria	Spirochaetota	Spirochaetia	Treponematales	Treponemataceae	Treponema_D	Treponema_D sp900316905
Cow_SGB_0497	93.71	0	2554439	2242	197469	Bacteria	Spirochaetota	Spirochaetia	Treponematales	Treponemataceae	Treponema_D	Treponema_D sp902799665
Cow_SGB_0498	100	0	2618703	2284	89241	Bacteria	Spirochaetota	Spirochaetia	Treponematales	Treponemataceae	Treponema_D	Treponema_D sp016290995
Cow_SGB_0499	96	0.27	2827589	2459	40695	Bacteria	Spirochaetota	GWE2-31-10	GWE2-31-10	GWE2-31-10	RGIG8597	RGIG8597 sp017624275
Cow_SGB_0500	95.2	0.8	2814922	2453	37152	Bacteria	Spirochaetota	GWE2-31-10	GWE2-31-10	GWE2-31-10	RGIG8597	unclassified
Cow_SGB_0501	82.75	0.53	1899491	1924	5212	Bacteria	Spirochaetota	GWE2-31-10	GWE2-31-10	GWE2-31-10	RGIG8597	unclassified
Cow_SGB_0502	82.39	8.57	2716177	2565	14471	Bacteria	Spirochaetota	Spirochaetia	Treponematales	Treponemataceae	RGIG1711	unclassified
Cow_SGB_0503	83.71	9.1	2914592	2921	5408	Bacteria	Spirochaetota	Spirochaetia	Treponematales	Treponemataceae	RGIG1711	unclassified
Cow_SGB_0504	82.33	3.15	2491020	2556	6087	Bacteria	Spirochaetota	Spirochaetia	Treponematales	Treponemataceae	UBA1240	UBA1240 sp902797925
Cow_SGB_0505	98.6	3.37	2772563	2642	29592	Bacteria	Spirochaetota	Spirochaetia	Treponematales	Treponemataceae	UBA1240	UBA1240 sp016285185
Cow_SGB_0506	90.8	2.3	3453887	3171	82512	Bacteria	Pseudomonadota	Gammaproteobacteria	Enterobacterales_A	Neiellaceae	RGIG665	RGIG665 sp017425245
Cow_SGB_0507	57.4	2.43	1310284	1438	3600	Bacteria	Bacillota_A	Clostridia	Lachnospirales	Lachnospiraceae	RGIG7193	unclassified
Cow_SGB_0508	93.53	0.35	2684956	2452	15840	Bacteria	Spirochaetota	Spirochaetia	Treponematales	Treponemataceae	Treponema_D	Treponema_D sp902803415
Cow_SGB_0509	93.83	0	2688438	2385	19225	Bacteria	Spirochaetota	Spirochaetia	Treponematales	Treponemataceae	Treponema_D	Treponema_D sp902783245
Cow_SGB_0510	85.99	1.68	1753624	1686	16819	Bacteria	Bacillota_A	Clostridia	Oscillospirales	Ruminococcaceae	Ruminiclostridium_E	unclassified
Cow_SGB_0511	96.31	0	2481946	2225	88462	Bacteria	Bacillota_A	Clostridia	Oscillospirales	Ruminococcaceae	Ruminiclostridium_E	Ruminiclostridium_E sp017942025
Cow_SGB_0512	69.31	1.72	1086197	1144	5424	Bacteria	Bacillota_A	Clostridia	Oscillospirales	CAG-272	Flemingibacterium	unclassified
Cow_SGB_0513	57.41	0	1286946	1474	3379	Bacteria	Bacillota_A	Clostridia	Oscillospirales	Ruminococcaceae	Ruminiclostridium_E	unclassified
Cow_SGB_0514	84.25	1.33	1685825	1593	8984	Bacteria	Bacillota	Bacilli	RFN20	CAG-288	Enterosoma	Enterosoma sp902771745
Cow_SGB_0515	81.35	1.73	1340531	1366	5226	Bacteria	Bacillota	Bacilli	RFN20	CAG-288	Enterosoma	Enterosoma sp900313465
Cow_SGB_0516	81.86	1.44	2221122	2173	6730	Bacteria	Spirochaetota	Spirochaetia	Treponematales	Treponemataceae	Treponema_D	Treponema_D sp002395155
Cow_SGB_0517	87.76	0	2222464	2054	50854	Bacteria	Spirochaetota	Spirochaetia	Treponematales	Treponemataceae	Treponema_D	unclassified
Cow_SGB_0518	99.3	0.7	2680865	2371	128185	Bacteria	Spirochaetota	Spirochaetia	Treponematales	Treponemataceae	Treponema_D	Treponema_D sp016286365
Cow_SGB_0519	92.31	0	2470798	2264	14919	Bacteria	Spirochaetota	Spirochaetia	Treponematales	Treponemataceae	Treponema_D	Treponema_D sp902772975
Cow_SGB_0520	96.76	0	2043254	1806	84486	Bacteria	Bacillota_A	Clostridia	Oscillospirales	CAG-272	SIG655	unclassified
Cow_SGB_0521	53.75	3.52	1021840	1287	2435	Bacteria	Pseudomonadota	Gammaproteobacteria	Burkholderiales	Neisseriaceae	RGIG9985	unclassified
Cow_SGB_0522	55.19	3.86	888817	1115	2250	Bacteria	Pseudomonadota	Gammaproteobacteria	Burkholderiales	Neisseriaceae	RGIG9985	unclassified
Cow_SGB_0523	97.9	0.7	3074970	2788	64039	Bacteria	Spirochaetota	Spirochaetia	Treponematales	Treponemataceae	Treponema_D	unclassified
Cow_SGB_0524	89.51	1.75	3026665	2586	28265	Bacteria	Spirochaetota	Spirochaetia	Treponematales	Treponemataceae	Treponema_D	Treponema_D sp902785455
Cow_SGB_0525	92.81	2.14	2935419	2903	9628	Bacteria	Spirochaetota	Spirochaetia	Treponematales	Treponemataceae	Treponema_D	Treponema_D sp902803735
Cow_SGB_0526	95.45	5.68	2363169	2184	18735	Bacteria	Spirochaetota	Spirochaetia	Treponematales	Treponemataceae	Treponema_D	Treponema_D sp016283615
Cow_SGB_0527	93.36	2.1	2433580	2021	56370	Bacteria	Spirochaetota	Spirochaetia	Treponematales	Treponemataceae	Treponema_D	Treponema_D sp002392405
Cow_SGB_0528	96.62	2.45	3354252	3160	33374	Bacteria	Spirochaetota	Spirochaetia	Treponematales	Treponemataceae	Treponema_D	Treponema_D sp902778325
Cow_SGB_0529	92.06	4.2	2293157	2065	30713	Bacteria	Spirochaetota	Spirochaetia	Treponematales	Treponemataceae	Treponema_D	Treponema_D sp002309195
Cow_SGB_0530	82.61	1.05	2073272	2010	8842	Bacteria	Spirochaetota	Spirochaetia	Treponematales	Treponemataceae	Treponema_D	Treponema_D sp002350445
Cow_SGB_0531	96.57	5.31	2772340	2612	15495	Bacteria	Spirochaetota	Spirochaetia	Treponematales	Treponemataceae	Treponema_D	Treponema_D sp016282835
Cow_SGB_0532	93.57	2.39	2468072	2296	17079	Bacteria	Spirochaetota	Spirochaetia	Treponematales	Treponemataceae	RGIG1711	unclassified
Cow_SGB_0533	99.3	0.7	2256749	2006	55883	Bacteria	Spirochaetota	Spirochaetia	Treponematales	Treponemataceae	RGIG1711	unclassified
Cow_SGB_0534	97.57	0	2347276	2126	20274	Bacteria	Spirochaetota	Spirochaetia	Treponematales	Treponemataceae	Treponema_D	Treponema_D bryantii_D
Cow_SGB_0535	95.8	0.17	2709954	2455	21228	Bacteria	Spirochaetota	Spirochaetia	Treponematales	Treponemataceae	Treponema_D	unclassified
Cow_SGB_0536	97.2	0	2921889	2535	62517	Bacteria	Spirochaetota	Spirochaetia	Treponematales	Treponemataceae	Treponema_D	unclassified
Cow_SGB_0537	97.9	1.4	2392721	2016	179161	Bacteria	Spirochaetota	Spirochaetia	Treponematales	Treponemataceae	Treponema_D	Treponema_D sp900767955
Cow_SGB_0538	97.2	3.1	2376143	2297	12689	Bacteria	Spirochaetota	Spirochaetia	Treponematales	Treponemataceae	RGIG9060	unclassified
Cow_SGB_0539	57.34	5.33	1623500	1903	2390	Bacteria	Spirochaetota	Spirochaetia	Treponematales	Treponemataceae	RGIG9060	unclassified
Cow_SGB_0540	54.96	9.95	1909748	2445	2126	Bacteria	Spirochaetota	Spirochaetia	Treponematales	Treponemataceae	RGIG9060	unclassified
Cow_SGB_0541	98.02	0.35	2473745	2301	41360	Bacteria	Spirochaetota	Spirochaetia	Treponematales	Treponemataceae	RGIG9060	unclassified
Cow_SGB_0542	59.49	0.14	1206834	1383	3484	Bacteria	Spirochaetota	Spirochaetia	Treponematales	Treponemataceae	RGIG9060	unclassified
Cow_SGB_0543	96	5.99	2395179	2173	41313	Bacteria	Spirochaetota	Spirochaetia	Treponematales	Treponemataceae	RGIG9060	unclassified
Cow_SGB_0544	89.86	3.11	3125146	2891	75547	Bacteria	Spirochaetota	Spirochaetia	Treponematales	Treponemataceae	RGIG9060	unclassified
Cow_SGB_0545	96.5	1.05	2674079	2315	56013	Bacteria	Spirochaetota	Spirochaetia	Treponematales	Treponemataceae	Treponema_D	unclassified
Cow_SGB_0546	97.82	0	2787819	2459	51951	Bacteria	Spirochaetota	Spirochaetia	Treponematales	Treponemataceae	Treponema_D	Treponema_D sp017381365
Cow_SGB_0547	52.24	1.02	1273814	1210	18523	Bacteria	Spirochaetota	Spirochaetia	Treponematales	Treponemataceae	Treponema_D	Treponema_D sp017381365
Cow_SGB_0548	92.62	3.63	2660378	2334	28086	Bacteria	Spirochaetota	Spirochaetia	Treponematales	Treponemataceae	Treponema_D	Treponema_D sp017392945
Cow_SGB_0549	99.22	0	2705395	2351	151202	Bacteria	Spirochaetota	Spirochaetia	Treponematales	Treponemataceae	Treponema_D	unclassified
Cow_SGB_0550	63.94	0	1569813	1511	9105	Bacteria	Spirochaetota	Spirochaetia	Treponematales	Treponemataceae	Treponema_D	Treponema_D sp017390125
Cow_SGB_0551	88.81	0.23	1995695	1736	40521	Bacteria	Spirochaetota	Spirochaetia	Treponematales	Treponemataceae	Treponema_D	Treponema_D sp016297405
Cow_SGB_0552	97.08	3.15	2257220	2015	26599	Bacteria	Spirochaetota	Spirochaetia	Treponematales	Treponemataceae	Treponema_D	unclassified
Cow_SGB_0553	89.43	5.59	2719577	2816	8918	Bacteria	Spirochaetota	Spirochaetia	Treponematales	Treponemataceae	Treponema_D	Treponema_D sp017386165
Cow_SGB_0554	94.68	1.4	2530325	2189	29103	Bacteria	Spirochaetota	Spirochaetia	Treponematales	Treponemataceae	Treponema_D	Treponema_D sp902797305
Cow_SGB_0555	97.32	0.23	2814301	2534	103241	Bacteria	Spirochaetota	Spirochaetia	Treponematales	Treponemataceae	Treponema_D	Treponema_D sp900319625
Cow_SGB_0556	100	0	2869490	2506	215500	Bacteria	Spirochaetota	Spirochaetia	Treponematales	Treponemataceae	Treponema_D	Treponema_D sp000619925
Cow_SGB_0557	91.82	8.69	2708073	2583	11717	Bacteria	Spirochaetota	Spirochaetia	Treponematales	Treponemataceae	Treponema_D	unclassified
Cow_SGB_0558	99.3	0.23	3191470	2760	266175	Bacteria	Spirochaetota	Spirochaetia	Treponematales	Treponemataceae	Treponema_D	Treponema_D bryantii_A
Cow_SGB_0559	100	1.4	3432581	3057	420425	Bacteria	Spirochaetota	Spirochaetia	Treponematales	Treponemataceae	Treponema_D	Treponema_D bryantii_C
Cow_SGB_0560	100	0	3309485	2867	220528	Bacteria	Spirochaetota	Spirochaetia	Treponematales	Treponemataceae	Treponema_D	Treponema_D bryantii_B
Cow_SGB_0561	88.81	1.63	2696117	2568	10635	Bacteria	Spirochaetota	Spirochaetia	Treponematales	Treponemataceae	Treponema_D	unclassified
Cow_SGB_0562	94.86	0.72	3148727	2744	72102	Bacteria	Spirochaetota	Spirochaetia	Treponematales	Treponemataceae	Treponema_D	Treponema_D sp902789325
Cow_SGB_0563	53.49	3.85	2040992	2547	2306	Bacteria	Spirochaetota	Spirochaetia	Treponematales	Treponemataceae	Treponema_D	unclassified
Cow_SGB_0564	96.85	7.87	3944791	3497	36970	Bacteria	Spirochaetota	Spirochaetia	Treponematales	Treponemataceae	Treponema_D	Treponema_D sp016290335
Cow_SGB_0565	97.9	2.46	3512630	3137	92634	Bacteria	Spirochaetota	Spirochaetia	Treponematales	Treponemataceae	Treponema_D	Treponema_D sp902802305
Cow_SGB_0566	94.17	0	2548732	2119	257761	Bacteria	Spirochaetota	Spirochaetia	Treponematales	Treponemataceae	Treponema_D	Treponema_D sp016286535
Cow_SGB_0567	86.73	0.87	3114519	2498	91656	Bacteria	Bacteroidota	Bacteroidia	Bacteroidales	Bacteroidaceae	UBA3839	UBA3839 sp900314125
Cow_SGB_0568	77.32	4.69	3367725	2764	21918	Bacteria	Bacteroidota	Bacteroidia	Bacteroidales	Bacteroidaceae	UBA3839	UBA3839 sp016284045
Cow_SGB_0569	97.9	0.7	2381478	2080	138425	Bacteria	Spirochaetota	Spirochaetia	Treponematales	Treponemataceae	Treponema_D	Treponema_D porcinum
Cow_SGB_0570	90.91	0.7	3082637	2937	12948	Bacteria	Spirochaetota	Spirochaetia	Treponematales	Treponemataceae	Treponema_D	Treponema_D sp002373205
Cow_SGB_0571	97.2	0	2411176	2173	174545	Bacteria	Spirochaetota	Spirochaetia	Treponematales	Treponemataceae	Treponema_D	Treponema_D sp900317625
Cow_SGB_0572	100	0	2671873	2525	155998	Bacteria	Spirochaetota	Spirochaetia	Treponematales	Treponemataceae	Treponema_D	Treponema_D sp945873775
Cow_SGB_0573	97.53	0.04	2329096	2179	32152	Bacteria	Spirochaetota	Spirochaetia	Treponematales	Treponemataceae	Treponema_F	Treponema_F sp017629095
Cow_SGB_0574	50.4	3.15	1384725	1578	3511	Bacteria	Spirochaetota	Spirochaetia	Treponematales	Treponemataceae	Treponema_F	Treponema_F sp017629095
Cow_SGB_0575	66.52	1.4	1530797	1774	3028	Bacteria	Spirochaetota	Spirochaetia	Treponematales	Treponemataceae	Treponema_F	Treponema_F sp017629095
Cow_SGB_0576	95.49	1.05	2505763	2405	16196	Bacteria	Spirochaetota	Spirochaetia	Treponematales	Treponemataceae	Treponema_F	unclassified
Cow_SGB_0577	99.3	0	2391371	2173	152781	Bacteria	Spirochaetota	Spirochaetia	Treponematales	Treponemataceae	Treponema_F	Treponema_F sp017646305
Cow_SGB_0578	90.41	4.92	2011739	2175	5234	Bacteria	Spirochaetota	Spirochaetia	Treponematales	Treponemataceae	Treponema_F	Treponema_F sp016294105
Cow_SGB_0579	82.27	1.4	2016508	1921	8552	Bacteria	Spirochaetota	Spirochaetia	Treponematales	Treponemataceae	Treponema_D	Treponema_D sp002369025
Cow_SGB_0580	84.54	1.75	1439698	1494	5893	Bacteria	Spirochaetota	Spirochaetia	Treponematales	Treponemataceae	RGIG268	RGIG268 sp017382775
Cow_SGB_0581	100	1.4	2816045	2371	51966	Bacteria	Spirochaetota	Spirochaetia	Treponematales	Treponemataceae	Treponema_D	Treponema_D sp002396325
Cow_SGB_0582	99.3	2.1	3214273	2851	109466	Bacteria	Spirochaetota	Spirochaetia	Treponematales	Treponemataceae	Treponema_D	Treponema_D sp016281495
Cow_SGB_0583	98.72	1.42	3103898	2750	36711	Bacteria	Spirochaetota	Spirochaetia	Treponematales	Treponemataceae	Treponema_D	Treponema_D sp902783155
Cow_SGB_0584	77.9	2.87	2296174	2349	5870	Bacteria	Spirochaetota	Spirochaetia	Treponematales	Treponemataceae	Treponema_D	Treponema_D sp017421145
Cow_SGB_0585	81.03	0.7	2198949	2048	6651	Bacteria	Spirochaetota	Spirochaetia	Treponematales	Treponemataceae	Treponema_D	Treponema_D sp902772605
Cow_SGB_0586	54.7	6.99	1918531	2188	2283	Bacteria	Spirochaetota	Spirochaetia	Treponematales	Treponemataceae	Treponema_D	Treponema_D sp902772605
Cow_SGB_0587	99.22	1.1	3528909	3161	86267	Bacteria	Spirochaetota	Spirochaetia	Treponematales	Treponemataceae	Treponema_D	Treponema_D sp016288205
Cow_SGB_0588	83.29	0.7	2194107	2103	6386	Bacteria	Spirochaetota	Spirochaetia	Treponematales	Treponemataceae	Treponema_D	unclassified
Cow_SGB_0589	99.07	0	2082633	1842	47974	Bacteria	Spirochaetota	Spirochaetia	Treponematales	Treponemataceae	Treponema_D	Treponema_D sp902766125
Cow_SGB_0590	98.66	0.35	2145695	2044	13937	Bacteria	Spirochaetota	Spirochaetia	Treponematales	Treponemataceae	Treponema_D	Treponema_D sp003455655
Cow_SGB_0591	78.75	3.17	2151911	2088	6405	Bacteria	Spirochaetota	Spirochaetia	Treponematales	Treponemataceae	Treponema_D	Treponema_D sp016282455
Cow_SGB_0592	96.5	0	2102490	1827	55228	Bacteria	Spirochaetota	Spirochaetia	Treponematales	Treponemataceae	Treponema_D	Treponema_D sp016294035
Cow_SGB_0593	89.31	3.17	2787444	2611	10473	Bacteria	Spirochaetota	Spirochaetia	Treponematales	Treponemataceae	Treponema_D	Treponema_D sp002394685
Cow_SGB_0594	99.51	0.74	1588007	1613	90894	Bacteria	Campylobacterota	Campylobacteria	Campylobacterales	Campylobacteraceae	Campylobacter	Campylobacter sp017646085
Cow_SGB_0595	95.97	0	2583702	2160	144781	Bacteria	Bacteroidota	Bacteroidia	Bacteroidales	BM520	RGIG7150	RGIG7150 sp016285515
Cow_SGB_0596	97.76	0.37	1507258	1496	176916	Bacteria	Campylobacterota	Campylobacteria	Campylobacterales	Campylobacteraceae	Campylobacter	Campylobacter sp900319915
Cow_SGB_0597	75.2	3.35	1032593	1290	3269	Bacteria	Campylobacterota	Campylobacteria	Campylobacterales	Campylobacteraceae	Campylobacter_B	Campylobacter_B sp017469645
Cow_SGB_0598	97.84	1.38	1600942	1759	9031	Bacteria	Campylobacterota	Campylobacteria	Campylobacterales	Campylobacteraceae	Campylobacter	Campylobacter sp945873855
Cow_SGB_0599	90.6	1.69	3806520	3317	22500	Bacteria	Riflebacteria	Ozemobacteria	Ozemobacterales	Ozemobacteraceae	RUG334	RUG334 sp900317935
Cow_SGB_0600	82.03	5.06	4138857	3517	12137	Bacteria	Riflebacteria	Ozemobacteria	Ozemobacterales	Ozemobacteraceae	RUG334	unclassified
Cow_SGB_0601	96	5.11	4684540	3730	32103	Bacteria	Riflebacteria	Ozemobacteria	Ozemobacterales	Ozemobacteraceae	RUG334	unclassified
Cow_SGB_0602	86.56	4.12	4045619	3439	9660	Bacteria	Riflebacteria	Ozemobacteria	Ozemobacterales	Ozemobacteraceae	RUG334	unclassified
Cow_SGB_0603	87.88	2.62	1079636	1114	55780	Bacteria	Bacillota	Bacilli	RF39	UBA660	RUG11241	RUG11241 sp902767245
Cow_SGB_0604	83.69	4	1446684	1566	5914	Bacteria	Bacillota	Bacilli	Acholeplasmatales	Anaeroplasmataceae	Anaeroplasma	Anaeroplasma sp902796895
Cow_SGB_0605	93.95	0.81	2143335	1787	39715	Bacteria	Bacillota_A	Clostridia	Christensenellales	Borkfalkiaceae	RGIG3732	unclassified
Cow_SGB_0606	87.14	1.52	1908864	1720	27805	Bacteria	Bacillota_A	Clostridia	Oscillospirales	CAG-272	CAG-841	CAG-841 sp016282315
Cow_SGB_0607	82.15	3.02	1667277	1624	9690	Bacteria	Bacillota_A	Clostridia	Oscillospirales	CAG-272	CAG-841	CAG-841 sp902791785
Cow_SGB_0608	86.54	2.56	2289381	2125	15315	Bacteria	Eremiobacterota	CADAWZ01	CADAWZ01	CADAWZ01	CADAWZ01	CADAWZ01 sp902791745
Cow_SGB_0609	95.51	1.28	3045195	2577	41011	Bacteria	Eremiobacterota	CADAWZ01	CADAWZ01	CADAWZ01	CADAWZ01	CADAWZ01 sp902790465
Cow_SGB_0610	93.26	2.25	1133356	1025	64217	Bacteria	RUG730	RUG730	RUG730	RUG730	RUG730	RUG730 sp900321865
Cow_SGB_0611	90.83	0	1326487	1130	158212	Bacteria	Bacillota_A	Clostridia	Oscillospirales	Ruminococcaceae	RUG12519	RUG12519 sp902779915
Cow_SGB_0612	89.49	0	1429887	1273	16300	Bacteria	Bacillota_A	Clostridia	Oscillospirales	Ruminococcaceae	RUG12519	RUG12519 sp902789925
Cow_SGB_0613	80.18	0.13	1202588	1205	10130	Bacteria	Bacillota_A	Clostridia	Oscillospirales	Ruminococcaceae	RUG12519	RUG12519 sp902798675
Cow_SGB_0614	86.45	2.93	2457755	2602	7026	Bacteria	Pseudomonadota	Gammaproteobacteria	Pseudomonadales	Moraxellaceae	Acinetobacter	Acinetobacter junii
Cow_SGB_0615	92.01	1.6	1513444	1547	7476	Archaea	Methanobacteriota	Methanobacteria	Methanobacteriales	Methanobacteriaceae	CADBMS01	CADBMS01 sp902795935
Cow_SGB_0616	76.86	2.03	2098572	1844	10262	Bacteria	Verrucomicrobiota	Verrucomicrobiae	Pedosphaerales	UBA1412	UBA1412	UBA1412 sp016283885
Cow_SGB_0617	99.2	0.8	2729633	2591	39854	Archaea	Methanobacteriota	Methanobacteria	Methanobacteriales	Methanobacteriaceae	Methanobrevibacter_B	Methanobrevibacter_B sp900314605
Cow_SGB_0618	99.2	0.8	2065486	1740	80577	Archaea	Methanobacteriota	Methanobacteria	Methanobacteriales	Methanobacteriaceae	Methanobrevibacter_B	unclassified
Cow_SGB_0619	100	0	2041814	1704	137557	Archaea	Methanobacteriota	Methanobacteria	Methanobacteriales	Methanobacteriaceae	Methanobrevibacter_B	Methanobrevibacter_B wolinii
Cow_SGB_0620	97.6	0.8	1863219	1627	143601	Archaea	Methanobacteriota	Methanobacteria	Methanobacteriales	Methanobacteriaceae	Methanobrevibacter_B	Methanobrevibacter_B boviskoreani
Cow_SGB_0621	98.93	1.6	2285716	1995	144925	Archaea	Methanobacteriota	Methanobacteria	Methanobacteriales	Methanobacteriaceae	Methanobrevibacter	Methanobrevibacter sp900314635
Cow_SGB_0622	50.48	0	777189	871	2423	Archaea	Methanobacteriota	Methanobacteria	Methanobacteriales	Methanobacteriaceae	Methanobrevibacter	Methanobrevibacter sp900314635
Cow_SGB_0623	50.39	6.44	947417	1068	2380	Archaea	Methanobacteriota	Methanobacteria	Methanobacteriales	Methanobacteriaceae	Methanobrevibacter	Methanobrevibacter sp900314635
Cow_SGB_0624	83.27	5.58	1898193	1746	10155	Archaea	Methanobacteriota	Methanobacteria	Methanobacteriales	Methanobacteriaceae	Methanobrevibacter	Methanobrevibacter sp900321995
Cow_SGB_0625	100	1.6	2122444	1827	49511	Archaea	Methanobacteriota	Methanobacteria	Methanobacteriales	Methanobacteriaceae	Methanobrevibacter	Methanobrevibacter olleyae
Cow_SGB_0626	86.4	1.72	2010788	1834	12947	Archaea	Methanobacteriota	Methanobacteria	Methanobacteriales	Methanobacteriaceae	Methanobrevibacter	unclassified
Cow_SGB_0627	91.33	1.2	2066989	1879	57234	Archaea	Methanobacteriota	Methanobacteria	Methanobacteriales	Methanobacteriaceae	Methanobrevibacter	Methanobrevibacter sp902774685
Cow_SGB_0628	78.87	1.6	1475662	1509	9015	Archaea	Methanobacteriota	Methanobacteria	Methanobacteriales	Methanobacteriaceae	Methanobrevibacter	Methanobrevibacter sp016291275
Cow_SGB_0629	100	0.8	2046587	1877	278549	Archaea	Methanobacteriota	Methanobacteria	Methanobacteriales	Methanobacteriaceae	Methanobrevibacter	Methanobrevibacter sp902784195
Cow_SGB_0630	64.32	3.24	1368202	1609	2372	Archaea	Methanobacteriota	Methanobacteria	Methanobacteriales	Methanobacteriaceae	Methanobrevibacter	unclassified
Cow_SGB_0631	59.4	7.84	1130466	1405	2242	Archaea	Methanobacteriota	Methanobacteria	Methanobacteriales	Methanobacteriaceae	Methanobrevibacter	Methanobrevibacter sp902784195
Cow_SGB_0632	93.4	2.4	2124986	1839	25717	Archaea	Methanobacteriota	Methanobacteria	Methanobacteriales	Methanobacteriaceae	Methanobrevibacter	unclassified
Cow_SGB_0633	91.36	1.87	3124922	2649	88158	Archaea	Methanobacteriota	Methanobacteria	Methanobacteriales	Methanobacteriaceae	Methanobrevibacter	Methanobrevibacter sp902769175
Cow_SGB_0634	100	1.85	2725667	2390	112462	Archaea	Methanobacteriota	Methanobacteria	Methanobacteriales	Methanobacteriaceae	Methanobrevibacter_A	Methanobrevibacter_A millerae
Cow_SGB_0635	98.4	0.8	2580180	2349	50191	Archaea	Methanobacteriota	Methanobacteria	Methanobacteriales	Methanobacteriaceae	Methanobrevibacter_A	Methanobrevibacter_A sp900317865
Cow_SGB_0636	92.8	2.06	2038809	2212	13289	Archaea	Methanobacteriota	Methanobacteria	Methanobacteriales	Methanobacteriaceae	Methanobrevibacter_A	unclassified
Cow_SGB_0637	96.53	0.16	2033196	1903	20326	Archaea	Methanobacteriota	Methanobacteria	Methanobacteriales	Methanobacteriaceae	Methanobrevibacter_A	Methanobrevibacter_A sp900319535
Cow_SGB_0638	93.72	1.2	2023059	2221	5608	Archaea	Methanobacteriota	Methanobacteria	Methanobacteriales	Methanobacteriaceae	Methanobrevibacter_A	Methanobrevibacter_A sp902777885
Cow_SGB_0639	81.29	8	1797112	1772	49369	Archaea	Methanobacteriota	Methanobacteria	Methanobacteriales	Methanobacteriaceae	Methanobrevibacter_A	Methanobrevibacter_A millerae_A
Cow_SGB_0640	62.04	1.6	1464022	1684	3296	Archaea	unclassified	unclassified	unclassified	unclassified	unclassified	unclassified
Cow_SGB_0641	81.15	0	1548567	1574	10803	Archaea	Methanobacteriota	Methanobacteria	Methanobacteriales	Methanobacteriaceae	Methanobrevibacter_A	Methanobrevibacter_A sp902783085
Cow_SGB_0642	81.76	4	2232988	2387	12086	Archaea	Methanobacteriota	Methanobacteria	Methanobacteriales	Methanobacteriaceae	Methanobrevibacter_A	Methanobrevibacter_A sp902772665
Cow_SGB_0643	83.5	0.06	1858520	1848	11939	Archaea	Methanobacteriota	Methanobacteria	Methanobacteriales	Methanobacteriaceae	Methanobrevibacter_A	Methanobrevibacter_A sp902782595
Cow_SGB_0644	80.87	5.6	1924194	2199	4472	Archaea	Methanobacteriota	Methanobacteria	Methanobacteriales	Methanobacteriaceae	Methanobrevibacter_A	unclassified
Cow_SGB_0645	80.52	2.86	2077899	2241	6161	Archaea	Methanobacteriota	Methanobacteria	Methanobacteriales	Methanobacteriaceae	Methanobrevibacter_A	unclassified
Cow_SGB_0646	99.2	0	2138290	2128	29628	Archaea	Methanobacteriota	Methanobacteria	Methanobacteriales	Methanobacteriaceae	Methanobrevibacter_A	Methanobrevibacter_A sp902774605
Cow_SGB_0647	100	0	2196820	2239	54228	Archaea	Methanobacteriota	Methanobacteria	Methanobacteriales	Methanobacteriaceae	Methanobrevibacter_A	Methanobrevibacter_A sp902788255
Cow_SGB_0648	75.66	1.83	1600556	1961	3714	Archaea	Methanobacteriota	Methanobacteria	Methanobacteriales	Methanobacteriaceae	Methanobrevibacter_A	unclassified
Cow_SGB_0649	86.47	1.85	1520109	1722	7721	Archaea	Methanobacteriota	Methanobacteria	Methanobacteriales	Methanobacteriaceae	Methanobrevibacter_A	Methanobrevibacter_A thaueri
Cow_SGB_0650	64.63	0.8	1046543	1334	2874	Archaea	Methanobacteriota	Methanobacteria	Methanobacteriales	Methanobacteriaceae	Methanobrevibacter_A	unclassified
Cow_SGB_0651	89.06	0	1549988	1711	12103	Archaea	Methanobacteriota	Methanobacteria	Methanobacteriales	Methanobacteriaceae	Methanobrevibacter_A	unclassified
Cow_SGB_0652	85.65	4	1384235	1618	5900	Archaea	Methanobacteriota	Methanobacteria	Methanobacteriales	Methanobacteriaceae	Methanobrevibacter_A	Methanobrevibacter_A sp900313645
Cow_SGB_0653	92.8	0	1970343	1977	45168	Archaea	Methanobacteriota	Methanobacteria	Methanobacteriales	Methanobacteriaceae	Methanobrevibacter_A	Methanobrevibacter_A sp900316895
Cow_SGB_0654	94.84	0.8	2334462	2150	72153	Archaea	Methanobacteriota	Methanobacteria	Methanobacteriales	Methanobacteriaceae	Methanobrevibacter_A	Methanobrevibacter_A sp900320515
Cow_SGB_0655	80.49	4	2274647	2240	15232	Archaea	Methanobacteriota	Methanobacteria	Methanobacteriales	Methanobacteriaceae	Methanobrevibacter_A	Methanobrevibacter_A sp902794475
Cow_SGB_0656	89.95	2.4	1983487	2047	20695	Archaea	Methanobacteriota	Methanobacteria	Methanobacteriales	Methanobacteriaceae	Methanobrevibacter_A	Methanobrevibacter_A sp902764015
Cow_SGB_0657	99	1.73	2431573	2326	75590	Archaea	Methanobacteriota	Methanobacteria	Methanobacteriales	Methanobacteriaceae	Methanobrevibacter_A	Methanobrevibacter_A sp900314615
Cow_SGB_0658	96.41	0.8	2750531	2518	63842	Archaea	Methanobacteriota	Methanobacteria	Methanobacteriales	Methanobacteriaceae	Methanobrevibacter_A	Methanobrevibacter_A sp902764455
Cow_SGB_0659	92.39	0	2288391	2057	69413	Archaea	Methanobacteriota	Methanobacteria	Methanobacteriales	Methanobacteriaceae	Methanobrevibacter_A	Methanobrevibacter_A sp900318035
Cow_SGB_0660	93.33	8	2175250	2138	57509	Archaea	Methanobacteriota	Methanobacteria	Methanobacteriales	Methanobacteriaceae	Methanobrevibacter_A	Methanobrevibacter_A sp902771435
Cow_SGB_0661	98.8	0.67	2711707	2459	81888	Archaea	Methanobacteriota	Methanobacteria	Methanobacteriales	Methanobacteriaceae	Methanobrevibacter_A	Methanobrevibacter_A sp900319985
Cow_SGB_0662	86.42	2.48	2291898	2332	13652	Archaea	Methanobacteriota	Methanobacteria	Methanobacteriales	Methanobacteriaceae	Methanobrevibacter_A	Methanobrevibacter_A sp900320955
Cow_SGB_0663	99.2	0	2229304	2329	15245	Archaea	Methanobacteriota	Methanobacteria	Methanobacteriales	Methanobacteriaceae	Methanobrevibacter_A	Methanobrevibacter_A sp900314695
Cow_SGB_0664	96.8	1.6	2161298	2028	58088	Archaea	Methanobacteriota	Methanobacteria	Methanobacteriales	Methanobacteriaceae	Methanobrevibacter_A	Methanobrevibacter_A sp902801725
Cow_SGB_0665	92.87	2.8	1894704	1949	27544	Archaea	Methanobacteriota	Methanobacteria	Methanobacteriales	Methanobacteriaceae	Methanobrevibacter_A	Methanobrevibacter_A sp902789505
Cow_SGB_0666	81.3	5.23	1664381	1936	5365	Archaea	Methanobacteriota	Methanobacteria	Methanobacteriales	Methanobacteriaceae	Methanobrevibacter_A	unclassified
Cow_SGB_0667	89.2	2.04	1433029	1652	7099	Archaea	Methanobacteriota	Methanobacteria	Methanobacteriales	Methanobacteriaceae	Methanobrevibacter_A	unclassified
Cow_SGB_0668	87.31	1.2	1759260	1821	28266	Archaea	Methanobacteriota	Methanobacteria	Methanobacteriales	Methanobacteriaceae	Methanobrevibacter_A	unclassified
Cow_SGB_0669	100	0	1864477	1896	121385	Archaea	Methanobacteriota	Methanobacteria	Methanobacteriales	Methanobacteriaceae	Methanobrevibacter_A	Methanobrevibacter_A gottschalkii
Cow_SGB_0670	98.93	3.6	2118247	2163	59876	Archaea	Methanobacteriota	Methanobacteria	Methanobacteriales	Methanobacteriaceae	Methanobrevibacter_A	Methanobrevibacter_A sp902770715
Cow_SGB_0671	97.81	1.39	2155436	2013	24580	Archaea	Methanobacteriota	Methanobacteria	Methanobacteriales	Methanobacteriaceae	Methanobrevibacter_A	Methanobrevibacter_A sp902785855
Cow_SGB_0672	80.02	4	1753756	1827	15348	Archaea	Methanobacteriota	Methanobacteria	Methanobacteriales	Methanobacteriaceae	Methanobrevibacter_A	unclassified
Cow_SGB_0673	82.16	1.6	1968768	1883	19063	Archaea	Methanobacteriota	Methanobacteria	Methanobacteriales	Methanobacteriaceae	Methanobrevibacter_A	Methanobrevibacter_A sp902796575
Cow_SGB_0674	79.14	0	1748008	1535	8041	Archaea	Methanobacteriota	Methanobacteria	Methanobacteriales	Methanobacteriaceae	Methanosphaera	unclassified
Cow_SGB_0675	94.26	1.14	1706156	1667	32227	Archaea	Methanobacteriota	Methanobacteria	Methanobacteriales	Methanobacteriaceae	Methanosphaera	Methanosphaera sp900322125
Cow_SGB_0676	97.6	1.6	3041524	3428	30856	Archaea	Methanobacteriota	Methanobacteria	Methanobacteriales	Methanobacteriaceae	Methanosphaera	unclassified
Cow_SGB_0677	94.4	0.8	1856051	1825	24189	Archaea	Methanobacteriota	Methanobacteria	Methanobacteriales	Methanobacteriaceae	Methanosphaera	Methanosphaera sp016282985
Cow_SGB_0678	64.49	1.66	1288133	1273	8247	Archaea	Methanobacteriota	Methanobacteria	Methanobacteriales	Methanobacteriaceae	Methanosphaera	unclassified
Cow_SGB_0679	87.02	2.4	1774247	1745	20375	Archaea	Methanobacteriota	Methanobacteria	Methanobacteriales	Methanobacteriaceae	Methanosphaera	Methanosphaera sp902797085
Cow_SGB_0680	58.85	0.46	718584	1369	3901	Bacteria	Bacillota	Bacilli	Mycoplasmatales	Mycoplasmoidaceae	RGIG1987	RGIG1987 sp017633195
Cow_SGB_0681	52.82	0.26	459977	877	3731	Bacteria	Bacillota	Bacilli	Mycoplasmatales	Mycoplasmoidaceae	RGIG1987	unclassified
Cow_SGB_0682	89.38	1.1	1012225	983	15023	Bacteria	Pseudomonadota	Alphaproteobacteria	Rickettsiales	UBA1997	RGIG8782	RGIG8782 sp017620845
Cow_SGB_0683	81.04	5.26	1101837	1146	14101	Bacteria	Bacillota	Bacilli	RF39	UBA660	RGIG1752	unclassified
Cow_SGB_0684	96.5	3.77	2087654	2111	30346	Bacteria	Bacillota	Bacilli	Erysipelotrichales	Erysipelotrichaceae	Faecalicoccus	Faecalicoccus sp900546545
Cow_SGB_0685	95.42	1.65	1995915	2112	16993	Bacteria	Bacillota	Bacilli	Erysipelotrichales	Erysipelotrichaceae	Holdemanella	Holdemanella porci
Cow_SGB_0686	94.38	1.12	1359551	1222	43146	Bacteria	Bacillota	Bacilli	RFN20	CAG-826	Onthovivens	Onthovivens sp900540395
Cow_SGB_0687	88.39	0.48	1320143	1207	18930	Bacteria	Bacillota	Bacilli	RFN20	CAG-826	Onthovivens	unclassified
Cow_SGB_0688	96.63	1.12	1229257	1136	35726	Bacteria	Bacillota	Bacilli	RFN20	CAG-826	Onthovivens	Onthovivens sp016302065
Cow_SGB_0689	96.63	0	1029596	906	559911	Bacteria	Bacillota	Bacilli	RFN20	CAG-826	Alectryobacillus	unclassified
Cow_SGB_0690	79.58	5.08	1922957	1860	19912	Bacteria	Bacillota_A	Clostridia	Lachnospirales	Lachnospiraceae	Eubacterium_I	unclassified
Cow_SGB_0691	98.88	2.25	1145081	1047	576481	Bacteria	Bacillota	Bacilli	RFN20	CAG-826	UBA3207	unclassified
Cow_SGB_0692	98.88	1.17	1038029	973	51107	Bacteria	Bacillota	Bacilli	RFN20	CAG-826	UBA3207	UBA3207 sp900314585
Cow_SGB_0693	94.38	1.17	989210	942	50250	Bacteria	Bacillota	Bacilli	RFN20	CAG-826	UBA3207	UBA3207 sp902768335
Cow_SGB_0694	97.75	1.12	1504250	1330	143416	Bacteria	Bacillota	Bacilli	RFN20	CAG-826	UBA3207	UBA3207 sp902787955
Cow_SGB_0695	96.02	0	1002795	1024	16648	Bacteria	Bacillota	Bacilli	RFN20	CAG-826	UBA3207	UBA3207 sp902796125
Cow_SGB_0696	91.2	0	922061	897	20190	Bacteria	Bacillota	Bacilli	RFN20	CAG-826	UBA3207	unclassified
Cow_SGB_0697	98.88	2.34	1096880	1023	73598	Bacteria	Bacillota	Bacilli	RFN20	CAG-826	UBA3207	UBA3207 sp902797855
Cow_SGB_0698	82.49	8.03	1137968	1074	10854	Bacteria	Bacillota	Bacilli	RFN20	CAG-826	UBA3207	unclassified
Cow_SGB_0699	96.63	0.11	1300550	1241	19754	Bacteria	Bacillota	Bacilli	RFN20	CAG-288	HGM10890	HGM10890 sp900769965
Cow_SGB_0700	86.24	2.25	1032791	969	21097	Bacteria	Bacillota	Bacilli	RFN20	CAG-826	SIG220	unclassified
Cow_SGB_0701	76.25	3.37	1049924	1214	3332	Bacteria	Bacillota	Bacilli	RFN20	CAG-826	RUG13091	unclassified
Cow_SGB_0702	81.46	2.25	1133709	1269	6201	Bacteria	Bacillota	Bacilli	RFN20	CAG-826	UBA3207	UBA3207 sp902774655
Cow_SGB_0703	93.26	1.12	1366132	1199	38078	Bacteria	Bacillota	Bacilli	RFN20	CAG-826	RGIG3315	unclassified
Cow_SGB_0704	88.54	5.46	966934	936	10744	Bacteria	Bacillota	Bacilli	RFN20	CAG-826	UBA2450	unclassified
Cow_SGB_0705	89.33	2.25	1109918	1005	55751	Bacteria	Bacillota	Bacilli	RFN20	CAG-826	RGIG3315	unclassified
Cow_SGB_0706	93.3	7.26	1414356	1329	14378	Bacteria	Bacillota	Bacilli	RFN20	CAG-826	RUG13091	RUG13091 sp016280685
Cow_SGB_0707	92.88	2.81	1171691	1116	64976	Bacteria	Bacillota	Bacilli	RFN20	CAG-826	RUG13091	RUG13091 sp902785645
Cow_SGB_0708	98.88	1.33	1551844	1438	72991	Bacteria	Bacillota	Bacilli	RFN20	CAG-826	CAJOLV01	unclassified
Cow_SGB_0709	92.13	0	1145068	1105	25946	Bacteria	Bacillota	Bacilli	RFN20	CAG-826	RUG14515	RUG14515 sp902763555
Cow_SGB_0710	84.83	5.06	1000291	1001	7557	Bacteria	Bacillota	Bacilli	RFN20	CAG-826	RUG14515	unclassified
Cow_SGB_0711	91.17	1.12	1374149	1211	86433	Bacteria	Bacillota	Bacilli	RFN20	CAG-826	RUG14515	RUG14515 sp902798595
Cow_SGB_0712	83.52	4.91	1200249	1359	5752	Bacteria	Bacillota	Bacilli	RFN20	CAG-826	RUG14515	RUG14515 sp902782395
Cow_SGB_0713	84.27	5.62	1047566	1050	17270	Bacteria	Bacillota	Bacilli	RFN20	CAG-826	RUG14515	RUG14515 sp902801805
Cow_SGB_0714	87.06	0.88	1617635	1451	52834	Bacteria	Bacillota	Bacilli	RFN20	CAG-826	RUG14515	RUG14515 sp902777015
Cow_SGB_0715	88.8	3.37	1392571	1344	21779	Bacteria	Bacillota	Bacilli	RFN20	CAG-826	RUG14515	RUG14515 sp902799855
Cow_SGB_0716	83.6	0.05	896439	834	92233	Bacteria	Bacillota	Bacilli	RFN20	CAG-826	CAJOLV01	unclassified
Cow_SGB_0717	80.66	7.87	1242634	1206	10235	Bacteria	Bacillota	Bacilli	RFN20	CAG-826	SIG220	unclassified
Cow_SGB_0718	92.59	2.3	1036820	1001	24119	Bacteria	Bacillota	Bacilli	RFN20	CAG-826	UBA2450	UBA2450 sp902803285
Cow_SGB_0719	98.31	3.37	1365086	1202	184155	Bacteria	Bacillota	Bacilli	RFN20	CAG-826	UBA2450	UBA2450 sp900314865
Cow_SGB_0720	92.7	1.17	1306068	1193	43368	Bacteria	Bacillota	Bacilli	RFN20	CAG-826	UBA2450	UBA2450 sp902800645
Cow_SGB_0721	95.51	3.42	1341770	1249	37689	Bacteria	Bacillota	Bacilli	RFN20	CAG-826	UBA2450	UBA2450 sp902769185
Cow_SGB_0722	98.88	3.37	1244139	1109	106266	Bacteria	Bacillota	Bacilli	RFN20	CAG-826	UBA2450	UBA2450 sp002392945
Cow_SGB_0723	97.75	4.54	1138734	1040	63897	Bacteria	Bacillota	Bacilli	RFN20	CAG-826	UBA2450	UBA2450 sp902800355
Cow_SGB_0724	98.88	1.12	1571086	1426	176179	Bacteria	Bacillota	Bacilli	RFN20	CAG-826	UBA2450	UBA2450 sp902800025
Cow_SGB_0725	98.31	5.62	1543289	1363	95903	Bacteria	Bacillota	Bacilli	RFN20	CAG-826	UBA2450	UBA2450 sp902802905
Cow_SGB_0726	97.75	4.03	1852402	1662	45241	Bacteria	Bacillota	Bacilli	RFN20	CAG-826	UBA2450	UBA2450 sp902800905
Cow_SGB_0727	80.84	3.37	1079316	1013	9643	Bacteria	Bacillota	Bacilli	RFN20	CAG-826	UBA2450	unclassified
Cow_SGB_0728	82.81	0.88	929460	885	12887	Bacteria	Bacillota	Bacilli	RFN20	CAG-826	UBA2450	unclassified
Cow_SGB_0729	86.61	0	1390871	1268	19077	Bacteria	Bacillota	Bacilli	RFN20	CAG-826	UBA2450	unclassified
Cow_SGB_0730	89.15	1.42	1279942	1500	6894	Bacteria	Bacillota	Bacilli	Erysipelotrichales	Erysipelotrichaceae	Erysipelothrix	unclassified
Cow_SGB_0731	80.9	1.12	1204893	1180	9126	Bacteria	Bacillota	Bacilli	RFN20	CAG-288	Enterosoma	Enterosoma sp902773085
Cow_SGB_0732	84.48	1.57	697769	725	7160	Bacteria	Bacillota	Bacilli	RFN20	CAG-826	RGIG9670	unclassified
Cow_SGB_0733	100	0.11	1887320	1783	62664	Bacteria	Bacillota	Bacilli	Acholeplasmatales	JAEDCM01	unclassified	unclassified
Cow_SGB_0734	91.32	1.26	2403064	2015	28103	Bacteria	Bdellovibrionota	UBA2361	UBA2361	CAKMMH01	CAKMMH01	unclassified
Cow_SGB_0735	82.67	0	1326751	1229	99106	Bacteria	Bacillota	Bacilli	Acholeplasmatales	Anaeroplasmataceae	UBA3206	UBA3206 sp002363705
Cow_SGB_0736	84	0	1413255	1433	4818	Bacteria	Bacillota	Bacilli	Acholeplasmatales	Anaeroplasmataceae	Anaeroplasma	unclassified
Cow_SGB_0737	96	2.67	1770187	1621	38704	Bacteria	Bacillota	Bacilli	Acholeplasmatales	Anaeroplasmataceae	Anaeroplasma	Anaeroplasma sp016288855
Cow_SGB_0738	88.72	8	1442291	1441	8478	Bacteria	Bacillota	Bacilli	Acholeplasmatales	Anaeroplasmataceae	Anaeroplasma	Anaeroplasma sp902783745
Cow_SGB_0739	81.21	2.67	1429586	1333	11512	Bacteria	Bacillota	Bacilli	Acholeplasmatales	Anaeroplasmataceae	Anaeroplasma	Anaeroplasma sp016282815
Cow_SGB_0740	84.67	4.44	1510498	1369	12434	Bacteria	Bacillota	Bacilli	Acholeplasmatales	Anaeroplasmataceae	Anaeroplasma	unclassified
Cow_SGB_0741	92.06	0.89	1590570	1528	14415	Bacteria	Bacillota	Bacilli	Acholeplasmatales	Anaeroplasmataceae	Anaeroplasma	Anaeroplasma sp016280975
Cow_SGB_0742	96	0.11	1930281	1721	96439	Bacteria	Bacillota	Bacilli	Acholeplasmatales	Anaeroplasmataceae	Anaeroplasma	unclassified
Cow_SGB_0743	90.67	0.12	2017047	2050	12127	Bacteria	Bacillota	Bacilli	Acholeplasmatales	Anaeroplasmataceae	Anaeroplasma	unclassified
Cow_SGB_0744	98.67	0	1575264	1540	38353	Bacteria	Bacillota	Bacilli	Acholeplasmatales	Anaeroplasmataceae	Anaeroplasma	unclassified
Cow_SGB_0745	90.67	1.33	1814537	1726	19991	Bacteria	Bacillota	Bacilli	Acholeplasmatales	Anaeroplasmataceae	Anaeroplasma	Anaeroplasma sp017388605
Cow_SGB_0746	84.08	2.11	1831437	1772	12378	Bacteria	Bacillota	Bacilli	Acholeplasmatales	Anaeroplasmataceae	Anaeroplasma	unclassified
Cow_SGB_0747	82.16	0.94	1151662	1216	12124	Bacteria	Bacillota_A	Clostridia	Peptostreptococcales	Peptostreptococcaceae	Paraclostridium	Paraclostridium sp017425305
Cow_SGB_0748	65.52	3.21	2006576	2709	4408	Bacteria	Bacillota_A	Clostridia	Peptostreptococcales	Peptostreptococcaceae	Paraclostridium	unclassified
Cow_SGB_0749	50.07	8.42	1913503	2098	6294	Bacteria	Bacillota_A	Clostridia	Peptostreptococcales	Peptostreptococcaceae	Paraclostridium	unclassified
Cow_SGB_0750	98.59	1.41	3583479	3461	3279752	Bacteria	Bacillota_A	Clostridia	Peptostreptococcales	Peptostreptococcaceae	Romboutsia_D	Romboutsia_D sp000686145
Cow_SGB_0751	100	0	3985435	3851	2643582	Bacteria	Bacillota_A	Clostridia	Peptostreptococcales	Peptostreptococcaceae	Terrisporobacter	Terrisporobacter petrolearius
Cow_SGB_0752	97.31	0	2129384	1869	48053	Bacteria	Bacteroidota	Bacteroidia	Bacteroidales	P3	Phil12	Phil12 sp900315335
Cow_SGB_0753	78.78	1.17	788801	893	3802	Bacteria	Bacillota_A	Clostridia	Christensenellales	UBA1242	unclassified	unclassified
Cow_SGB_0754	92.7	0.56	1256320	1058	287055	Bacteria	Bacillota_A	Clostridia	Christensenellales	UBA1242	HGM11367	unclassified
Cow_SGB_0755	82.46	5.42	692527	740	7241	Bacteria	Bacillota_A	Clostridia	Christensenellales	UBA1242	UBA7862	unclassified
Cow_SGB_0756	98.39	0	1956007	1662	130412	Bacteria	Bacteroidota	Bacteroidia	Bacteroidales	P3	Phil12	Phil12 sp900314725
Cow_SGB_0757	89.59	0.54	1832786	1753	8441	Bacteria	Bacteroidota	Bacteroidia	Bacteroidales	P3	Phil12	Phil12 sp900319595
Cow_SGB_0758	100	1.64	2897645	2336	651827	Bacteria	Bacteroidota	Bacteroidia	Bacteroidales	Dysgonomonadaceae	Fermentimonas	Fermentimonas sp015478775
Cow_SGB_0759	85	1.07	2356261	2028	15994	Bacteria	Bdellovibrionota	Oligoflexia	Oligoflexales	CACXFL01	CACXFL01	CACXFL01 sp902766925
Cow_SGB_0760	96.2	0.22	2433813	2377	33721	Bacteria	Bacillota_A	Clostridia	Lachnospirales	Lachnospiraceae	RGIG989	RGIG989 sp017390525
Cow_SGB_0761	96.77	1.26	2041483	1960	35031	Bacteria	Bacillota_A	Clostridia	Clostridiales	Clostridiaceae	Clostridium	Clostridium sp022767515
Cow_SGB_0762	93.24	1.66	2487714	2522	10292	Bacteria	Bacillota_A	Clostridia	Clostridiales	Clostridiaceae	Clostridium	Clostridium sp900317445
Cow_SGB_0763	92.62	0.8	3640415	3874	13124	Bacteria	Bacillota_A	Clostridia	Clostridiales	Clostridiaceae	Clostridium	Clostridium sp902785295
Cow_SGB_0764	56.48	9.81	1552706	2004	2985	Bacteria	Bacillota	Bacilli	RF39	UBA660	CAJOJR01	unclassified
Cow_SGB_0765	66.98	2.45	1611173	2003	6190	Bacteria	Bacillota_A	Clostridia	TANB77	RGIG9151	RGIG9151	unclassified
Cow_SGB_0766	89.35	4.52	2787194	2971	4285	Bacteria	Bacillota_A	Clostridia	Clostridiales	Clostridiaceae	Clostridium	Clostridium butyricum_B
Cow_SGB_0767	99.19	0	3561289	3489	320228	Bacteria	Bacillota_A	Clostridia	Clostridiales	Clostridiaceae	Clostridium	Clostridium paraputrificum
Cow_SGB_0768	98.39	3.39	3630749	3522	18957	Bacteria	Bacillota_A	Clostridia	Clostridiales	Clostridiaceae	Clostridium	Clostridium sp900116755
Cow_SGB_0769	76.17	2.7	2115265	2492	2938	Bacteria	Bacillota_A	Clostridia	Clostridiales	Clostridiaceae	Clostridium	unclassified
Cow_SGB_0770	52.37	0	880167	1054	2156	Bacteria	Bacillota_A	Clostridia	Clostridiales	Clostridiaceae	Clostridium	unclassified
Cow_SGB_0771	81.3	4.03	2776110	3148	8083	Bacteria	Bacillota_A	Clostridia	Clostridiales	Clostridiaceae	Clostridium	Clostridium sp017383505
Cow_SGB_0772	62.07	3.45	1390536	1605	8363	Bacteria	Bacillota_A	Clostridia	Clostridiales	Clostridiaceae	Clostridium	unclassified
Cow_SGB_0773	57.07	0.86	1195614	1481	3489	Bacteria	Bacillota_A	Clostridia	Clostridiales	Clostridiaceae	Clostridium	unclassified
Cow_SGB_0774	53.45	5.17	685870	817	5591	Bacteria	Bacillota_A	Clostridia	Clostridiales	Clostridiaceae	Clostridium	unclassified
Cow_SGB_0775	99.19	0	6106710	5503	236200	Bacteria	Bacillota_A	Clostridia	Clostridiales	Clostridiaceae	Clostridium	Clostridium beijerinckii_A
Cow_SGB_0776	99.19	0	3890121	3818	96421	Bacteria	Bacillota_A	Clostridia	Clostridiales	Clostridiaceae	Sarcina	Sarcina perfringens
Cow_SGB_0777	99.19	0	4550822	4100	237318	Bacteria	Bacillota_A	Clostridia	Clostridiales	Clostridiaceae	Clostridium	Clostridium butyricum
Cow_SGB_0778	99.08	0.81	3429124	3202	17608	Bacteria	Bacillota_A	Clostridia	Clostridiales	Clostridiaceae	Clostridium	unclassified
Cow_SGB_0779	61.71	0.95	1227240	1467	3515	Bacteria	Bacillota	Bacilli	Erysipelotrichales	Erysipelotrichaceae	RGIG1896	unclassified
Cow_SGB_0780	53.51	0.63	1074465	1387	2325	Bacteria	Bacillota	Bacilli	Erysipelotrichales	Erysipelotrichaceae	RGIG1896	unclassified
Cow_SGB_0781	58.62	0	1127490	1439	2684	Bacteria	Bacillota	Bacilli	Erysipelotrichales	Erysipelotrichaceae	RGIG1896	RGIG1896 sp017560205
Cow_SGB_0782	74.37	1.97	1314339	1653	2962	Bacteria	Bacillota	Bacilli	Erysipelotrichales	Erysipelotrichaceae	RGIG1896	unclassified
Cow_SGB_0783	97.14	0	2303138	2348	26023	Bacteria	Bacillota	Bacilli	Erysipelotrichales	Erysipelotrichaceae	RGIG1896	unclassified
Cow_SGB_0784	99.06	0.94	2857892	2744	25162	Bacteria	Bacillota	Bacilli	Erysipelotrichales	Coprobacillaceae	Intestinibaculum	Intestinibaculum sp900317015
Cow_SGB_0785	92.83	0.94	2420810	2383	22130	Bacteria	Bacillota	Bacilli	Erysipelotrichales	Coprobacillaceae	Intestinibaculum	Intestinibaculum porci
Cow_SGB_0786	98.11	4.15	2494995	2608	20925	Bacteria	Bacillota	Bacilli	Erysipelotrichales	Coprobacillaceae	RGIG9341	unclassified
Cow_SGB_0787	100	0	2074534	2050	116174	Bacteria	Bacillota	Bacilli	Erysipelotrichales	Coprobacillaceae	Kandleria	Kandleria vitulina
Cow_SGB_0788	87.03	0	1758673	1859	11864	Bacteria	Bacillota	Bacilli	Erysipelotrichales	Coprobacillaceae	Catenibacterium	Catenibacterium mitsuokai
Cow_SGB_0789	99.06	0.94	2329465	2305	54711	Bacteria	Bacillota	Bacilli	Erysipelotrichales	Coprobacillaceae	Sharpea	Sharpea azabuensis
Cow_SGB_0790	99.36	2.83	2219358	2329	25994	Bacteria	Bacillota	Bacilli	Erysipelotrichales	Coprobacillaceae	unclassified	unclassified
Cow_SGB_0791	94.47	7.55	2596733	2900	34207	Bacteria	Bacillota	Bacilli	Erysipelotrichales	Coprobacillaceae	unclassified	unclassified
Cow_SGB_0792	95.28	0.13	2075388	2270	15617	Bacteria	Bacillota	Bacilli	Erysipelotrichales	Coprobacillaceae	Massilimicrobiota	Massilimicrobiota merdigallinarum
Cow_SGB_0793	92.45	0	1833922	1954	15340	Bacteria	Bacillota	Bacilli	Erysipelotrichales	Coprobacillaceae	MGBC163490	unclassified
Cow_SGB_0794	100	0	3980421	3931	87841	Bacteria	Bacillota	Bacilli	Erysipelotrichales	Coprobacillaceae	Thomasclavelia	Thomasclavelia ramosa
Cow_SGB_0795	93.87	4.25	1369198	1654	6036	Bacteria	Bacillota	Bacilli	Erysipelotrichales	Erysipelotrichaceae	Traorella	unclassified
Cow_SGB_0796	74.83	2.19	1297935	1577	3200	Bacteria	Bacillota	Bacilli	Erysipelotrichales	Coprobacillaceae	Fimiplasma	unclassified
Cow_SGB_0797	85.18	3.66	1243614	1370	11731	Bacteria	Bacillota	Bacilli	Erysipelotrichales	Coprobacillaceae	Fimiplasma	unclassified
Cow_SGB_0798	85.55	1.34	1404720	1466	15932	Bacteria	Bacillota_A	Clostridia	Oscillospirales	Acutalibacteraceae	RUG14215	RUG14215 sp902796915
Cow_SGB_0799	91.35	2.25	1147069	1180	54883	Bacteria	Bacillota	Bacilli	RF39	UBA660	RUG11241	unclassified
Cow_SGB_0800	52.9	0.73	580837	514	13261	Bacteria	Bacteroidota	Bacteroidia	Cytophagales	Amoebophilaceae	unclassified	unclassified
Cow_SGB_0801	80.32	1	1440542	1625	39361	Bacteria	Bacillota_A	Clostridia	TANB77	CAG-508	CAG-452	unclassified
Cow_SGB_0802	83.37	1.33	1255177	1382	10313	Bacteria	Bacillota	Bacilli	RF39	UBA660	RUG11198	RUG11198 sp902766815
Cow_SGB_0803	88.5	2.25	1035072	1085	35401	Bacteria	Bacillota	Bacilli	RF39	UBA660	Coprosoma	Coprosoma sp902783895
Cow_SGB_0804	83.65	1.12	1149243	1256	14510	Bacteria	Bacillota	Bacilli	RF39	UBA660	Aphodocola	Aphodocola sp902795755
Cow_SGB_0805	88.2	2.25	947464	1008	59544	Bacteria	Bacillota	Bacilli	RF39	UBA660	Coprosoma	Coprosoma sp900318075
Cow_SGB_0806	91.48	1.17	965030	1058	15775	Bacteria	Bacillota	Bacilli	RF39	UBA660	Coprosoma	Coprosoma sp902783265
Cow_SGB_0807	62.57	0.88	651346	604	15302	Bacteria	Bacillota_A	Clostridia	Christensenellales	UBA1242	RGIG1681	unclassified
Cow_SGB_0808	94.51	0	1048135	1047	162601	Bacteria	Pseudomonadota	Alphaproteobacteria	Rs-D84	CACZYB01	CACZYB01	CACZYB01 sp902785275
Cow_SGB_0809	73.81	2.58	1249106	1056	24307	Bacteria	Bacillota_A	Clostridia	Christensenellales	UBA1242	UBA11490	unclassified
Cow_SGB_0810	82.85	3.85	1571857	1663	14148	Bacteria	Bacillota_A	Clostridia	TANB77	RGIG9151	RGIG9151	RGIG9151 sp016287855
Cow_SGB_0811	81.63	3.11	1244940	1288	8043	Bacteria	Bacillota	Bacilli	Acholeplasmatales	Anaeroplasmataceae	JAEELC01	JAEELC01 sp016288675
Cow_SGB_0812	96.63	2.25	1324263	1248	53575	Bacteria	Bacillota	Bacilli	RFN20	CAG-826	RUG131	RUG131 sp900315885
Cow_SGB_0813	89.14	0.34	1964822	1675	47415	Bacteria	Bacillota_A	Clostridia	Oscillospirales	Acutalibacteraceae	UBA737	unclassified
Cow_SGB_0814	96.63	2.25	1500314	1520	80254	Bacteria	Bacillota	Bacilli	RF39	UBA660	RUG12783	unclassified
Cow_SGB_0815	77.26	4.49	1271991	1240	22859	Bacteria	Bacillota	Bacilli	RF39	UBA660	RUG12783	RUG12783 sp016291895
Cow_SGB_0816	83.05	7.78	1238878	1337	13152	Bacteria	Bacillota	Bacilli	RF39	UBA660	RUG12783	unclassified
Cow_SGB_0817	95.27	0.12	1311236	1367	17944	Bacteria	Bacillota	Bacilli	RF39	UBA660	RUG12783	RUG12783 sp902783985
Cow_SGB_0818	87.01	1.33	893024	943	15456	Bacteria	Bacillota	Bacilli	RF39	UBA660	RUG12783	unclassified
Cow_SGB_0819	94.18	2	1290671	1369	14297	Bacteria	Bacillota	Bacilli	RF39	UBA660	RUG12783	RUG12783 sp902782535
Cow_SGB_0820	84.64	1.12	1510958	1473	32815	Bacteria	Bacillota	Bacilli	RF39	UBA660	RUG12783	RUG12783 sp902801795
Cow_SGB_0821	97.33	1.33	1967134	1963	69205	Bacteria	Bacillota	Bacilli	RF39	UBA660	RUG12783	unclassified
Cow_SGB_0822	52.21	4.41	496466	694	2227	Bacteria	Bacillota	Bacilli	Mycoplasmatales	Mycoplasmoidaceae	RUG11194	unclassified
Cow_SGB_0823	75.36	1.54	456623	791	229269	Bacteria	Bacillota	Bacilli	Mycoplasmatales	Mycoplasmoidaceae	RUG11194	RUG11194 sp902789825
Cow_SGB_0824	86.62	2.43	1745176	1605	8258	Bacteria	Bacillota_A	Clostridia	Christensenellales	DTU072	Stercoripulliclostridium_A	unclassified
Cow_SGB_0825	93.15	2.22	1770370	1580	11285	Bacteria	Bacillota_A	Clostridia	Christensenellales	DTU072	Stercoripulliclostridium_A	unclassified
Cow_SGB_0826	61.91	0.94	1557016	1257	17923	Bacteria	Bacillota_A	Clostridia	Christensenellales	DTU072	Stercoripulliclostridium_A	unclassified
Cow_SGB_0827	78.38	2.68	1623134	1685	4660	Bacteria	Bacillota_A	Clostridia	Christensenellales	DTU072	Stercoripulliclostridium_A	unclassified
Cow_SGB_0828	93.21	0.81	1737346	1419	54483	Bacteria	Bacillota_A	Clostridia	Christensenellales	DTU072	Stercoripulliclostridium_A	unclassified
Cow_SGB_0829	75.05	0.38	496386	905	17658	Bacteria	Bacillota	Bacilli	Mycoplasmatales	Mycoplasmoidaceae	Malacoplasma_A	Malacoplasma_A sp902791895
Cow_SGB_0830	77.41	0.11	544344	1001	27213	Bacteria	Bacillota	Bacilli	Mycoplasmatales	Mycoplasmoidaceae	Malacoplasma_A	Malacoplasma_A sp900316595
Cow_SGB_0831	80.15	0	567903	1026	69665	Bacteria	Bacillota	Bacilli	Mycoplasmatales	Mycoplasmoidaceae	Malacoplasma_A	Malacoplasma_A sp902800015
Cow_SGB_0832	78.98	0	708752	1139	17472	Bacteria	Bacillota	Bacilli	Mycoplasmatales	Mycoplasmoidaceae	Malacoplasma_A	unclassified
Cow_SGB_0833	70.28	0.26	548823	992	11026	Bacteria	Bacillota	Bacilli	Mycoplasmatales	Mycoplasmoidaceae	Malacoplasma_A	Malacoplasma_A sp902782585
Cow_SGB_0834	72.3	0.64	490727	909	10782	Bacteria	Bacillota	Bacilli	Mycoplasmatales	Mycoplasmoidaceae	Malacoplasma_A	Malacoplasma_A sp002372615
Cow_SGB_0835	93.33	4.85	1427139	1347	15119	Bacteria	Bacillota	Bacilli	ML615J-28	CAG-313	UBA1737	UBA1737 sp900317575
Cow_SGB_0836	86.85	1.12	1208643	1370	6351	Bacteria	Bacillota	Bacilli	RF39	UBA660	UBA5578	unclassified
Cow_SGB_0837	81.96	3.93	1136481	1314	7135	Bacteria	Bacillota	Bacilli	RF39	UBA660	UBA5578	unclassified
Cow_SGB_0838	87.84	0.16	1200500	1248	15246	Bacteria	Bacillota	Bacilli	RF39	UBA660	RUG591	RUG591 sp900320425
Cow_SGB_0839	82.91	1.56	1033908	1167	8550	Bacteria	Bacillota	Bacilli	RF39	UBA660	RUG591	RUG591 sp902782915
Cow_SGB_0840	87.36	2.25	1301023	1410	68027	Bacteria	Bacillota	Bacilli	RF39	UBA660	CAG-302	CAG-302 sp002375205
Cow_SGB_0841	50.11	4.67	824073	944	10024	Bacteria	Bacillota	Bacilli	RF39	UBA660	CAG-302	unclassified
Cow_SGB_0842	90.19	4	1386874	1584	27962	Bacteria	Bacillota	Bacilli	RF39	UBA660	Scybalousia	unclassified
Cow_SGB_0843	61.75	0.88	1036764	1276	3900	Bacteria	Bacillota	Bacilli	RF39	UBA660	Coprovivens	unclassified
Cow_SGB_0844	60.85	0	1054806	1167	5038	Bacteria	Bacillota	Bacilli	RF39	UBA660	Coprovivens	unclassified
Cow_SGB_0845	66.83	0	1362354	1559	6515	Bacteria	Bacillota	Bacilli	RF39	UBA660	Coprovivens	unclassified
Cow_SGB_0846	50.88	0	896702	1076	2952	Bacteria	Bacillota	Bacilli	RF39	UBA660	Coprovivens	unclassified
Cow_SGB_0847	50.32	0	1139485	1364	3156	Bacteria	unclassified	unclassified	unclassified	unclassified	unclassified	unclassified
Cow_SGB_0848	62.6	1.75	1564492	1605	24079	Bacteria	Bacillota	Bacilli	RF39	UBA660	Coprovivens	unclassified
Cow_SGB_0849	67.3	1.98	1095885	1187	7646	Bacteria	Bacillota	Bacilli	RF39	UBA660	Coprovivens	unclassified
Cow_SGB_0850	68.35	3.37	1265534	1367	8945	Bacteria	Bacillota	Bacilli	RF39	UBA660	Coprovivens	unclassified
Cow_SGB_0851	89.33	3.37	1418276	1423	37039	Bacteria	Bacillota	Bacilli	RF39	UBA660	Coprovivens	Coprovivens sp902800945
Cow_SGB_0852	92.13	2.25	1773789	1855	23809	Bacteria	Bacillota	Bacilli	RF39	UBA660	Coprovivens	unclassified
Cow_SGB_0853	88.45	4.72	2041409	2288	9897	Bacteria	Bacillota	Bacilli	RF39	UBA660	Coprovivens	Coprovivens sp017411235
Cow_SGB_0854	72.47	0.56	925728	997	48782	Bacteria	Bacillota	Bacilli	RF39	UBA660	RUG11198	unclassified
Cow_SGB_0855	80.24	4.54	2127215	2503	6843	Bacteria	Bacillota	Bacilli	RF39	UBA660	RUG11198	unclassified
Cow_SGB_0856	80.85	2.86	986394	1061	10798	Bacteria	Bacillota	Bacilli	RF39	UBA660	Coprovivens	Coprovivens sp902795675
Cow_SGB_0857	86.13	9.63	1279457	1379	9880	Bacteria	Bacillota	Bacilli	RF39	UBA660	Coprovivens	unclassified
Cow_SGB_0858	88.46	3.37	1034514	1098	22635	Bacteria	Bacillota	Bacilli	RF39	UBA660	UBA6448	unclassified
Cow_SGB_0859	88.48	1.12	1057696	1094	49416	Bacteria	Bacillota	Bacilli	RF39	UBA660	UBA6448	unclassified
Cow_SGB_0860	84.27	1.12	1083921	1096	71722	Bacteria	Bacillota	Bacilli	RF39	UBA660	UBA6448	UBA6448 sp016282375
Cow_SGB_0861	86.52	2.25	1108707	1226	16518	Bacteria	Bacillota	Bacilli	RF39	UBA660	RUG12834	RUG12834 sp902783185
Cow_SGB_0862	81.06	0	843998	929	9983	Bacteria	Bacillota	Bacilli	RF39	UBA660	RUG14121	RUG14121 sp902795845
Cow_SGB_0863	87.08	0.56	1099038	1232	43453	Bacteria	Bacillota	Bacilli	RF39	UBA660	RUG13160	RUG13160 sp902786275
Cow_SGB_0864	89.61	5.36	1200682	1218	93782	Bacteria	Bacillota	Bacilli	RF39	UBA660	RUG13160	unclassified
Cow_SGB_0865	80.29	3.93	1046078	1171	8534	Bacteria	Bacillota	Bacilli	RF39	UBA660	CAG-628	CAG-628 sp003524085
Cow_SGB_0866	82.81	1.12	976577	1089	9896	Bacteria	Bacillota	Bacilli	RF39	UBA660	Onthocola_B	Onthocola_B sp902797105
Cow_SGB_0867	88.76	1.12	880493	898	99692	Bacteria	Bacillota	Bacilli	RF39	UBA660	CAG-533	unclassified
Cow_SGB_0868	87.6	1.4	1054087	1133	21285	Bacteria	Bacillota	Bacilli	RF39	UBA660	CAG-533	CAG-533 sp902767375
Cow_SGB_0869	83.71	3.18	973299	1063	17780	Bacteria	Bacillota	Bacilli	RF39	UBA660	CAG-533	CAG-533 sp902783345
Cow_SGB_0870	81.73	1.69	1170021	1231	16286	Bacteria	Bacillota	Bacilli	RF39	UBA660	CAG-533	CAG-533 sp902783555
Cow_SGB_0871	83.86	2.81	906397	1019	10103	Bacteria	Bacillota	Bacilli	RF39	UBA660	CAG-533	CAG-533 sp902766545
Cow_SGB_0872	81.12	9.15	1348389	1516	9536	Bacteria	Bacillota	Bacilli	RF39	UBA660	RGIG1752	unclassified
Cow_SGB_0873	91.57	1.12	979098	1012	99960	Bacteria	Bacillota	Bacilli	RF39	UBA660	SIG200	SIG200 sp016288795
Cow_SGB_0874	87.7	8.54	1239831	1349	42544	Bacteria	Bacillota	Bacilli	RF39	UBA660	UBA6448	unclassified
Cow_SGB_0875	90.45	5.73	1142344	1140	36189	Bacteria	Bacillota	Bacilli	RF39	UBA660	CAKOSP01	CAKOSP01 sp016288635
Cow_SGB_0876	92.07	2.47	1212766	1288	49713	Bacteria	Bacillota	Bacilli	RF39	UBA660	CAG-302	unclassified
Cow_SGB_0877	85.7	4.67	1548272	1826	21803	Bacteria	Bacillota	Bacilli	RF39	UBA660	CAG-302	unclassified
Cow_SGB_0878	93.26	0.56	1111316	1135	64025	Bacteria	Bacillota	Bacilli	RF39	UBA660	UMGS1124	unclassified
Cow_SGB_0879	87.64	2.81	999864	1087	16455	Bacteria	Bacillota	Bacilli	RF39	UBA660	RUG12834	unclassified
Cow_SGB_0880	83.71	2.25	836446	924	14324	Bacteria	Bacillota	Bacilli	RF39	UBA660	CAKOSP01	unclassified
Cow_SGB_0881	88.2	0	1361130	1661	30178	Bacteria	Bacillota	Bacilli	RF39	UBA660	RGIG1752	unclassified
Cow_SGB_0882	81.97	1.12	977784	1069	9242	Bacteria	Bacillota	Bacilli	RF39	UBA660	Ventrenecus	Ventrenecus sp902766135
Cow_SGB_0883	90.55	2.79	1300173	1361	5010	Bacteria	Bacillota	Bacilli	Izemoplasmatales	UBA1188	UBA1188	UBA1188 sp900318975
Cow_SGB_0884	92.7	5.06	1336569	1358	51204	Bacteria	Bacillota	Bacilli	RF39	UBA660	RUG11867	RUG11867 sp902795215
Cow_SGB_0885	95.28	3.54	1808126	1866	24134	Bacteria	Bacillota	Bacilli	Erysipelotrichales	Erysipelotrichaceae	Absicoccus	Absicoccus porci
Cow_SGB_0886	86.81	0	751025	678	44599	Bacteria	Pseudomonadota	Alphaproteobacteria	RUG11792	RUG11792	RUG14087	RUG14087 sp902784055
Cow_SGB_0887	86.81	0	759153	681	44015	Bacteria	Pseudomonadota	Alphaproteobacteria	RUG11792	RUG11792	RUG14087	RUG14087 sp902795615
Cow_SGB_0888	87.03	0.92	1137382	1310	12383	Bacteria	Bacillota	Bacilli	Erysipelotrichales	Erysipelotrichaceae	DUUI01	unclassified
Cow_SGB_0889	85.03	2.25	869076	875	10466	Bacteria	Bacillota_A	Clostridia	Christensenellales	UBA1242	UBA9845	UBA9845 sp902796635
Cow_SGB_0890	91.95	9.15	1761746	2131	17645	Bacteria	Bacillota	Bacilli	RF39	UBA660	Coprosoma	unclassified
Cow_SGB_0891	92.21	1.17	1342868	1421	31583	Bacteria	Bacillota	Bacilli	RF39	UBA660	Coprosoma	unclassified
Cow_SGB_0892	75.08	0.38	614885	1113	26750	Bacteria	Bacillota	Bacilli	Mycoplasmatales	Mycoplasmoidaceae	RUG11194	RUG11194 sp902766725
Cow_SGB_0893	77.58	1.54	634998	1117	12415	Bacteria	Bacillota	Bacilli	Mycoplasmatales	Mycoplasmoidaceae	RUG11194	unclassified
Cow_SGB_0894	83.02	2.31	606749	1051	62851	Bacteria	Bacillota	Bacilli	Mycoplasmatales	Mycoplasmoidaceae	Malacoplasma_A	Malacoplasma_A sp016288695
Cow_SGB_0895	84.57	1.45	1082723	1172	9326	Bacteria	Bacillota	Bacilli	RF39	UBA660	RUG705	RUG705 sp900321645
Cow_SGB_0896	88.2	1.12	1229261	1314	29134	Bacteria	Bacillota	Bacilli	RF39	UBA660	RUG705	RUG705 sp902788975
Cow_SGB_0897	87.07	2	1140482	1134	66737	Bacteria	Bacillota	Bacilli	RF39	UBA660	RUG705	unclassified
Cow_SGB_0898	82.02	1.12	1244718	1235	40400	Bacteria	Bacillota	Bacilli	RF39	UBA660	RUG705	unclassified
Cow_SGB_0899	90.45	1.12	1511358	1704	53696	Bacteria	Bacillota	Bacilli	RF39	UBA660	RUG705	unclassified
Cow_SGB_0900	85.39	0.11	943375	999	14830	Bacteria	Bacillota	Bacilli	RF39	UBA660	RUG705	unclassified
Cow_SGB_0901	80.27	1.33	1253981	1181	30190	Bacteria	Bacillota	Bacilli	RF39	UBA660	RUG705	unclassified
Cow_SGB_0902	81.82	0	1238523	1244	18294	Bacteria	Bacillota	Bacilli	RF39	UBA660	RUG705	unclassified
Cow_SGB_0903	90.45	1.12	1162601	1201	52176	Bacteria	Bacillota	Bacilli	RF39	UBA660	RUG705	unclassified
Cow_SGB_0904	87.05	0	1305739	1294	24629	Bacteria	Bacillota	Bacilli	RF39	UBA660	RUG705	unclassified
Cow_SGB_0905	77.01	2.25	827804	905	17098	Bacteria	Bacillota	Bacilli	RF39	UBA660	RUG705	RUG705 sp016291995
Cow_SGB_0906	85.44	0.71	1436812	1291	54590	Bacteria	Verrucomicrobiota	Kiritimatiellia	RFP12	UBA1067	UBA1067	UBA1067 sp017542055
Cow_SGB_0907	86.11	0.71	1473780	1323	52329	Bacteria	Verrucomicrobiota	Kiritimatiellia	RFP12	UBA1067	UBA1067	UBA1067 sp017525475
Cow_SGB_0908	82.36	0.74	1307998	1207	39153	Bacteria	Verrucomicrobiota	Kiritimatiellia	RFP12	UBA1067	UBA1067	unclassified
Cow_SGB_0909	63.53	0	1517048	1635	4422	Bacteria	Verrucomicrobiota	Kiritimatiellia	RFP12	UBA1067	UBA1067	UBA1067 sp017629735
Cow_SGB_0910	90.21	4.16	1209539	1213	70313	Bacteria	Bacillota	Bacilli	RF39	UBA660	RUG705	unclassified
Cow_SGB_0911	85.07	0.67	824087	948	6168	Bacteria	Bacillota	Bacilli	RF39	UBA660	CAG-533	CAG-533 sp000434495
Cow_SGB_0912	87.92	1.12	1069625	1132	41139	Bacteria	Bacillota	Bacilli	RF39	UBA660	UMGS1449	UMGS1449 sp902797995
Cow_SGB_0913	81.46	1.12	943672	938	99850	Bacteria	Bacillota	Bacilli	RF39	UBA660	UMGS1449	unclassified
Cow_SGB_0914	89.32	4	1172626	1241	13388	Bacteria	Bacillota	Bacilli	RF39	UBA660	RUG591	RUG591 sp902797275
Cow_SGB_0915	80.26	8.67	1196093	1364	8179	Bacteria	Bacillota	Bacilli	RF39	UBA660	RUG591	unclassified
Cow_SGB_0916	80.04	6.34	1229203	1285	19683	Bacteria	Bacillota	Bacilli	RF39	UBA660	RUG591	unclassified
Cow_SGB_0917	76.58	3.62	1578243	1584	8689	Bacteria	Bacillota_A	Clostridia	TANB77	CAG-508	Scatovivens	unclassified
Cow_SGB_0918	67.38	2.65	1533970	1618	5523	Bacteria	Bacillota_A	Clostridia	TANB77	CAG-508	Scatovivens	unclassified
Cow_SGB_0919	86.69	2.56	1812452	1660	102303	Bacteria	Bacillota_A	Clostridia	TANB77	CAG-508	Scatovivens	Scatovivens sp002449785
Cow_SGB_0920	84.01	2.24	2182864	2444	13845	Bacteria	Bacillota_A	Clostridia	TANB77	CAG-508	Scatovivens	unclassified
Cow_SGB_0921	76.68	1.07	1509257	1384	82494	Bacteria	Bacillota_A	Clostridia	TANB77	CAG-508	Scatovivens	Scatovivens sp016290095
Cow_SGB_0922	81.42	3.61	1901232	1801	36041	Bacteria	Bacillota_A	Clostridia	TANB77	CAG-508	Scatovivens	unclassified
Cow_SGB_0923	80.31	7.45	2736678	2593	7366	Bacteria	Bacillota_A	Clostridia	TANB77	CAG-508	Scatovivens	unclassified
Cow_SGB_0924	61.94	5.09	1395720	1459	34900	Bacteria	Bacillota_A	Clostridia	TANB77	CAG-508	CAG-269	unclassified
Cow_SGB_0925	72.31	1.57	1334260	1400	19379	Bacteria	Bacillota_A	Clostridia	TANB77	CAG-508	CAG-269	unclassified
Cow_SGB_0926	75.66	2.8	2517995	3043	25513	Bacteria	Bacillota_A	Clostridia	TANB77	CAG-508	HGM13634	unclassified
Cow_SGB_0927	53.03	3.36	1113750	1140	7758	Bacteria	Bacillota_A	Clostridia	TANB77	CAG-508	Scatovivens	unclassified
Cow_SGB_0928	71.84	7.75	1270283	1474	4811	Bacteria	Bacillota_A	Clostridia	TANB77	CAG-508	CAG-269	CAG-269 sp017430135
Cow_SGB_0929	62.25	1.96	1161811	1517	5017	Bacteria	Bacillota_A	Clostridia	TANB77	CAG-508	CAG-269	unclassified
Cow_SGB_0930	72.75	0.89	1886285	2441	8006	Bacteria	Bacillota_A	Clostridia	TANB77	CAG-508	CAG-269	unclassified
Cow_SGB_0931	55.84	1.01	1244340	1483	6844	Bacteria	Bacillota_A	Clostridia	TANB77	CAG-508	CAG-269	unclassified
Cow_SGB_0932	84.45	5.42	1077538	1268	6524	Bacteria	Bacillota_A	Clostridia	TANB77	CAG-508	CAG-269	CAG-269 sp902760765
Cow_SGB_0933	80.58	2.01	1850870	1822	135981	Bacteria	Bacillota_A	Clostridia	TANB77	CAG-508	CAG-269	CAG-269 sp902787685
Cow_SGB_0934	55.12	1.51	1004397	939	20598	Bacteria	Bacillota_A	Clostridia	TANB77	CAG-508	UMGS1994	unclassified
Cow_SGB_0935	90.73	0	1147606	1185	22304	Bacteria	Bacillota	Bacilli	RF39	UBA660	UBA6985	UBA6985 sp900314465
Cow_SGB_0936	92.7	4.31	1291637	1257	85561	Bacteria	Bacillota	Bacilli	RF39	UBA660	UBA6985	UBA6985 sp016283935
Cow_SGB_0937	84.3	3.87	1118262	1177	15488	Bacteria	Bacillota	Bacilli	RF39	UBA660	HGM10766	unclassified
Cow_SGB_0938	84.27	2.25	1047010	1029	47139	Bacteria	Bacillota	Bacilli	RF39	UBA660	UBA6985	UBA6985 sp024683115
Cow_SGB_0939	78.46	0.67	993837	1149	5578	Bacteria	Bacillota	Bacilli	RF39	UBA660	CAG-582	unclassified
Cow_SGB_0940	82.77	5.83	1157920	1332	5137	Bacteria	Bacillota	Bacilli	RF39	UBA660	CAG-582	unclassified
Cow_SGB_0941	87.67	2.41	1195531	1292	25025	Bacteria	Bacillota	Bacilli	RF39	UBA660	UBA2730	UBA2730 sp900320505
Cow_SGB_0942	93.82	1.28	1144003	1197	41725	Bacteria	Bacillota	Bacilli	RF39	UBA660	UBA2730	UBA2730 sp900319955
Cow_SGB_0943	80.32	7.02	1315513	1461	8858	Bacteria	Bacillota	Bacilli	RF39	UBA660	RUG11890	unclassified
Cow_SGB_0944	80.92	2.67	929523	992	21878	Bacteria	Bacillota	Bacilli	RF39	UBA660	CALVUP01	unclassified
Cow_SGB_0945	85.39	1.37	1112249	1253	7251	Bacteria	Bacillota	Bacilli	RF39	UBA660	RUG11867	RUG11867 sp902797415
Cow_SGB_0946	88.2	2.25	1320231	1548	15819	Bacteria	Bacillota	Bacilli	RF39	UBA660	RUG11867	unclassified
Cow_SGB_0947	84.27	3.36	932770	1024	8848	Bacteria	Bacillota	Bacilli	RF39	UBA660	RUG11867	RUG11867 sp902773365
Cow_SGB_0948	87.64	1.12	1355272	1552	15209	Bacteria	Bacillota	Bacilli	RF39	UBA660	UBA3789	UBA3789 sp902776735
Cow_SGB_0949	93.82	1.12	1388612	1491	39664	Bacteria	Bacillota	Bacilli	RF39	UBA660	UBA3789	UBA3789 sp900314225
Cow_SGB_0950	82.25	8.45	1396608	1745	10676	Bacteria	Bacillota	Bacilli	RF39	UBA660	RUG11198	unclassified
Cow_SGB_0951	93.39	0.67	1528929	1736	49810	Bacteria	Bacillota	Bacilli	RF39	UBA660	CAG-417	CAG-417 sp902791625
Cow_SGB_0952	93.82	1.12	1261249	1309	40861	Bacteria	Bacillota	Bacilli	RF39	UBA660	RUG14670	RUG14670 sp902801525
Cow_SGB_0953	83.07	0	1068457	1125	29179	Bacteria	Bacillota	Bacilli	RF39	UBA660	UBA3789	UBA3789 sp902793315
Cow_SGB_0954	83.99	4.65	1459803	1600	24869	Bacteria	Bacillota	Bacilli	RF39	UBA660	RUG11890	RUG11890 sp902773675
Cow_SGB_0955	82.58	1.12	1024202	1158	10970	Bacteria	Bacillota	Bacilli	RF39	UBA660	RUG343	RUG343 sp900317975
Cow_SGB_0956	77.06	7.19	1316403	1507	7548	Bacteria	Bacillota	Bacilli	RF39	UBA660	RUG343	unclassified
Cow_SGB_0957	95.22	3.37	1599065	1559	104580	Bacteria	Bacillota	Bacilli	RF39	UBA660	RUG343	RUG343 sp902789225
Cow_SGB_0958	91.85	1.12	1293186	1231	59563	Bacteria	Bacillota	Bacilli	RF39	UBA660	RUG343	unclassified
Cow_SGB_0959	89.58	7.12	1309568	1381	11896	Bacteria	Bacillota	Bacilli	RF39	UBA660	JAEDES01	unclassified
Cow_SGB_0960	90.85	4.67	1450361	1455	49227	Bacteria	Bacillota	Bacilli	RF39	UBA660	JAEDES01	unclassified
Cow_SGB_0961	96.84	2.67	1392069	1398	118016	Bacteria	Bacillota	Bacilli	RF39	UBA660	JAEDES01	JAEDES01 sp017409785
Cow_SGB_0962	73.83	3.93	1154852	1363	3943	Bacteria	Bacillota	Bacilli	RF39	UBA660	JAEDES01	unclassified
Cow_SGB_0963	55.92	0	1480472	1769	10559	Bacteria	Bacillota	Bacilli	RF39	UBA660	JAEDES01	unclassified
Cow_SGB_0964	60.07	0	789059	753	88971	Bacteria	Bacillota	Bacilli	RF39	UBA660	JAEDES01	unclassified
Cow_SGB_0965	86.87	2.25	1375908	1402	18063	Bacteria	Bacillota	Bacilli	RF39	UBA660	UBA3789	UBA3789 sp902797265
Cow_SGB_0966	86.25	0	1078772	1107	18055	Bacteria	Bacillota	Bacilli	RF39	UBA660	UBA3789	unclassified
Cow_SGB_0967	81.63	1.33	1448950	1374	38225	Bacteria	Bacillota	Bacilli	RF39	UBA660	UBA3789	unclassified
Cow_SGB_0968	86.67	0	1274942	1321	14918	Bacteria	Bacillota	Bacilli	RF39	UBA660	UBA3789	unclassified
Cow_SGB_0969	93.82	2.41	1704451	1745	51599	Bacteria	Bacillota	Bacilli	RF39	UBA660	UBA3789	unclassified
Cow_SGB_0970	93.82	1.12	1825141	1908	40449	Bacteria	Bacillota	Bacilli	RF39	UBA660	UBA3789	UBA3789 sp902780395
Cow_SGB_0971	91.57	6.74	1752555	2048	23281	Bacteria	Bacillota	Bacilli	RF39	UBA660	UBA3789	UBA3789 sp902780585
Cow_SGB_0972	83.63	2.67	1395915	1397	20675	Bacteria	Bacillota	Bacilli	RF39	UBA660	UBA3789	UBA3789 sp902783315
Cow_SGB_0973	88.14	0	1142411	1182	9804	Bacteria	Bacillota	Bacilli	RF39	UBA660	UBA3789	UBA3789 sp902796215
Cow_SGB_0974	80	0.93	1517394	1549	11468	Bacteria	Bacillota	Bacilli	RF39	UBA660	UBA3789	UBA3789 sp902782835
Cow_SGB_0975	93.33	1.33	1641081	1658	115109	Bacteria	Bacillota	Bacilli	RF39	UBA660	UBA3789	unclassified
Cow_SGB_0976	91.85	1.69	1573419	1611	52156	Bacteria	Bacillota	Bacilli	RF39	UBA660	UBA3789	UBA3789 sp902764545
Cow_SGB_0977	90.93	2.67	1739707	1882	26433	Bacteria	Bacillota	Bacilli	RF39	UBA660	UBA3789	UBA3789 sp902768065
Cow_SGB_0978	90.36	1.12	1451910	1485	54719	Bacteria	Bacillota	Bacilli	RF39	UBA660	UBA3789	UBA3789 sp902798815
Cow_SGB_0979	83.99	3.53	1820753	2164	22596	Bacteria	Bacillota	Bacilli	RF39	UBA660	UBA3789	UBA3789 sp902794075
Cow_SGB_0980	86.49	4.67	1216071	1323	18622	Bacteria	Bacillota	Bacilli	RF39	UBA660	UMGS995	UMGS995 sp902784095
Cow_SGB_0981	90.45	6.18	990338	1026	95321	Bacteria	Bacillota	Bacilli	RF39	UBA660	UMGS995	unclassified
Cow_SGB_0982	82.85	4.49	1195784	1294	6621	Bacteria	Bacillota	Bacilli	RF39	UBA660	RUG11224	RUG11224 sp902767005
Cow_SGB_0983	88.92	1.33	1515150	1477	42435	Bacteria	Bacillota	Bacilli	RF39	UBA660	RUG11224	unclassified
Cow_SGB_0984	82.96	6.18	1033895	1048	22060	Bacteria	Bacillota	Bacilli	RF39	UBA660	RUG343	unclassified
Cow_SGB_0985	87.07	1.33	1162082	1197	128318	Bacteria	Bacillota	Bacilli	RF39	UBA660	UBA3789	unclassified
Cow_SGB_0986	89.43	0	1125233	1153	79797	Bacteria	Bacillota	Bacilli	RF39	UBA660	UBA3789	unclassified
Cow_SGB_0987	80.06	1.12	1017318	1129	20235	Bacteria	Bacillota	Bacilli	RF39	UBA660	UBA3789	UBA3789 sp902788735
Cow_SGB_0988	81.7	3.37	1296602	1358	20600	Bacteria	Bacillota	Bacilli	RF39	UBA660	UBA3789	UBA3789 sp902783435
Cow_SGB_0989	90.17	4.13	1111560	1233	18334	Bacteria	Bacillota	Bacilli	RF39	UBA660	JAEDES01	unclassified
Cow_SGB_0990	88.76	3.58	1131399	1151	27369	Bacteria	Bacillota	Bacilli	RF39	UBA660	UBA3789	UBA3789 sp900543055
Cow_SGB_0991	81.46	0	871283	913	30868	Bacteria	Bacillota	Bacilli	RF39	UBA660	CAG-1193	CAG-1193 sp017428495
Cow_SGB_0992	82.21	4	921454	1041	12737	Bacteria	Bacillota	Bacilli	RF39	UBA660	CAG-1193	CAG-1193 sp902783915
Cow_SGB_0993	77.23	0.89	1302689	1411	22592	Bacteria	Bacillota_A	Clostridia	TANB77	CAG-508	UMGS1933	unclassified
Cow_SGB_0994	72.57	0	1097187	1108	126386	Bacteria	Bacillota_A	Clostridia	TANB77	CAG-465	UMGS1649	unclassified
Cow_SGB_0995	50.88	1.75	707622	903	6845	Bacteria	Bacillota	Bacilli	RF39	UBA660	RUG13038	unclassified
Cow_SGB_0996	58.45	1.17	555530	617	5807	Bacteria	Bacillota	Bacilli	RF39	UBA660	RUG13038	unclassified
Cow_SGB_0997	83.15	1.12	867836	977	31909	Bacteria	Bacillota	Bacilli	RF39	UBA660	RUG13038	RUG13038 sp017418945
Cow_SGB_0998	92.7	2.25	1088471	1080	75410	Bacteria	Bacillota	Bacilli	RF39	UBA660	RUG13038	RUG13038 sp902785135
Cow_SGB_0999	91.57	5.62	1110388	1136	45762	Bacteria	Bacillota	Bacilli	RF39	UBA660	RUG13038	RUG13038 sp016290885
Cow_SGB_1000	88.2	1.12	856231	920	44407	Bacteria	Bacillota	Bacilli	RF39	UBA660	RUG13038	RUG13038 sp902801825
Cow_SGB_1001	91.57	0.16	1033179	1047	62223	Bacteria	Bacillota	Bacilli	RF39	UBA660	RUG13038	RUG13038 sp902789425
Cow_SGB_1002	86.52	4.65	1136495	1230	43516	Bacteria	Bacillota	Bacilli	RF39	UBA660	CAG-433	unclassified
Cow_SGB_1003	90.45	6.62	1303110	1448	22117	Bacteria	Bacillota	Bacilli	RF39	UBA660	CAG-433	unclassified
Cow_SGB_1004	86.87	0	797426	875	32064	Bacteria	Bacillota	Bacilli	RF39	UBA660	CAG-433	CAG-433 sp900320735
Cow_SGB_1005	81.06	3.93	897232	1010	7538	Bacteria	Bacillota	Bacilli	RF39	UBA660	CAG-433	CAG-433 sp900546245
Cow_SGB_1006	89.3	4.68	1185525	1225	22400	Bacteria	Bacillota	Bacilli	RF39	UBA660	RGIG4266	RGIG4266 sp016283075
Cow_SGB_1007	84.54	1.35	1149575	1210	8250	Bacteria	Bacillota	Bacilli	RF39	UBA660	CAG-1000	unclassified
Cow_SGB_1008	80.43	4.21	1032804	1072	20612	Bacteria	Bacillota	Bacilli	RF39	UBA660	CAG-1000	CAG-1000 sp900313815
Cow_SGB_1009	89.33	0	1272940	1337	41705	Bacteria	Bacillota	Bacilli	RF39	UBA660	CAG-1000	CAG-1000 sp902778125
Cow_SGB_1010	92.7	0.56	1446587	1506	63292	Bacteria	Bacillota	Bacilli	RF39	UBA660	CAG-1000	CAG-1000 sp902764145
Cow_SGB_1011	81.46	0.16	1442772	1444	101269	Bacteria	Bacillota	Bacilli	RF39	UBA660	CAG-1000	CAG-1000 sp902775285
Cow_SGB_1012	85.96	0.56	1473617	1514	97243	Bacteria	Bacillota	Bacilli	RF39	UBA660	CAG-1000	CAG-1000 sp902761685
Cow_SGB_1013	82.56	2.62	1611665	1728	66109	Bacteria	Bacillota	Bacilli	RF39	UBA660	CAG-1000	unclassified
Cow_SGB_1014	75.84	1.73	803189	897	5473	Bacteria	Bacillota	Bacilli	RF39	UBA660	CAG-1000	unclassified
Cow_SGB_1015	69.29	2.92	480828	573	4648	Bacteria	Bacillota	Bacilli	RF39	UBA660	Aphodocola	unclassified
Cow_SGB_1016	80.41	4.49	939561	1143	7207	Bacteria	Bacillota	Bacilli	RF39	UBA660	Coprosoma	unclassified
Cow_SGB_1017	85.6	2.81	924913	960	64258	Bacteria	Bacillota	Bacilli	RF39	UBA660	Coprosoma	unclassified
Cow_SGB_1018	97.33	0	1962353	1640	64519	Bacteria	Bacillota	Bacilli	Acholeplasmatales	Anaeroplasmataceae	unclassified	unclassified
Cow_SGB_1019	88.76	2.25	1356761	1459	17615	Bacteria	Bacillota	Bacilli	RF39	UBA660	CAJGDV01	CAJGDV01 sp904502155
Cow_SGB_1020	90.45	3.71	1778943	1852	24857	Bacteria	Bacillota	Bacilli	RF39	UBA660	CAJGDV01	CAJGDV01 sp022763805
Cow_SGB_1021	92.13	4.89	1170890	1271	81936	Bacteria	Bacillota	Bacilli	RF39	UBA660	RGIG4266	RGIG4266 sp016282155
Cow_SGB_1022	81.81	1.69	821885	931	14270	Bacteria	Bacillota	Bacilli	RF39	UBA660	UBA2730	UBA2730 sp900313345
Cow_SGB_1023	81.46	1.38	1167991	1170	9647	Bacteria	Bacillota	Bacilli	RF39	UBA660	RUG14903	RUG14903 sp902803795
Cow_SGB_1024	89.89	7.19	1019315	1088	20288	Bacteria	Bacillota	Bacilli	RF39	UBA660	Faecisoma	Faecisoma sp016288305
Cow_SGB_1025	87.32	7.46	1450302	1474	15967	Bacteria	Bacillota	Bacilli	RF39	UBA660	RUG14891	RUG14891 sp902803685
Cow_SGB_1026	90.45	2.25	1131657	1207	157281	Bacteria	Bacillota	Bacilli	RF39	UBA660	OMSK01	OMSK01 sp900313725
Cow_SGB_1027	89.33	5.06	1217224	1323	44911	Bacteria	Bacillota	Bacilli	RF39	UBA660	OMSK01	unclassified
Cow_SGB_1028	93.7	5.33	1131406	1210	18350	Bacteria	Bacillota	Bacilli	RF39	UBA660	UMGS1045	UMGS1045 sp016290195
Cow_SGB_1029	92.7	0	1054264	1153	21467	Bacteria	Bacillota	Bacilli	RF39	UBA660	CAJOJO01	CAJOJO01 sp900546745
Cow_SGB_1030	89.79	5.61	1279727	1483	41635	Bacteria	Bacillota	Bacilli	RF39	UBA660	UMGS1271	unclassified
Cow_SGB_1031	84.27	2.62	970556	1102	8167	Bacteria	Bacillota	Bacilli	RF39	UBA660	RUG12867	RUG12867 sp902783405
Cow_SGB_1032	89.04	0.56	1310184	1422	26926	Bacteria	Bacillota	Bacilli	RF39	UBA660	RUG12438	RUG12438 sp902801685
Cow_SGB_1033	84.55	1.69	1192075	1254	36260	Bacteria	Bacillota	Bacilli	RF39	UBA660	RUG12438	RUG12438 sp902779035
Cow_SGB_1034	87.36	1.28	1287232	1363	23610	Bacteria	Bacillota	Bacilli	RF39	UBA660	UBA3631	unclassified
Cow_SGB_1035	84.27	5.62	1231950	1386	16509	Bacteria	Bacillota	Bacilli	RF39	UBA660	UBA3631	unclassified
Cow_SGB_1036	85.07	2.25	1295945	1597	11215	Bacteria	Bacillota	Bacilli	RF39	UBA660	UMGS1613	unclassified
Cow_SGB_1037	65.95	1.75	1056495	1374	6716	Bacteria	Bacillota	Bacilli	RF39	UBA660	UMGS1613	unclassified
Cow_SGB_1038	80.96	8.99	1493505	1535	17168	Bacteria	Bacillota	Bacilli	RF39	UBA660	UBA5578	unclassified
Cow_SGB_1039	80.22	2.81	1359441	1386	35318	Bacteria	Bacillota	Bacilli	RF39	UBA660	UBA5578	UBA5578 sp902795975
Cow_SGB_1040	84.11	7.12	1400487	1439	23915	Bacteria	Bacillota	Bacilli	RF39	UBA660	UBA5578	unclassified
Cow_SGB_1041	89.33	4.09	1413780	1437	35787	Bacteria	Bacillota	Bacilli	RF39	UBA660	UBA5578	unclassified
Cow_SGB_1042	82.05	2.69	1175729	1280	9681	Bacteria	Bacillota	Bacilli	RF39	UBA660	RUG12438	RUG12438 sp902783215
Cow_SGB_1043	85.62	3.53	1001080	1094	11611	Bacteria	Bacillota	Bacilli	RF39	UBA660	RUG12438	RUG12438 sp902795725
Cow_SGB_1044	85.44	5.06	1327761	1421	37793	Bacteria	Bacillota	Bacilli	RF39	UBA660	UMGS1613	unclassified
Cow_SGB_1045	95.39	7.3	1451343	1594	7331	Bacteria	Bacillota	Bacilli	RF39	UBA660	RUG11788	unclassified
Cow_SGB_1046	73.64	2.67	1094847	1246	5170	Bacteria	Bacillota	Bacilli	RF39	UBA660	RUG11788	unclassified
Cow_SGB_1047	83.03	4.67	1118476	1237	8322	Bacteria	Bacillota	Bacilli	RF39	UBA660	RUG11788	RUG11788 sp902772675
Cow_SGB_1048	84.83	1.33	1616073	1662	21806	Bacteria	Bacillota	Bacilli	RF39	UBA660	RUG13868	RUG13868 sp902767365
Cow_SGB_1049	80.63	6.22	1600141	1705	21274	Bacteria	Bacillota	Bacilli	RF39	UBA660	RUG13868	unclassified
Cow_SGB_1050	93.82	1.12	1588398	1604	74902	Bacteria	Bacillota	Bacilli	RF39	UBA660	RUG13868	RUG13868 sp902793375
Cow_SGB_1051	93.54	1.69	1588436	1470	99166	Bacteria	Bacillota	Bacilli	RF39	UBA660	RUG13868	unclassified
Cow_SGB_1052	81.73	0	1051503	1180	10585	Bacteria	Bacillota	Bacilli	RF39	UBA660	RUG11215	RUG11215 sp902766875
Cow_SGB_1053	87.03	2.92	1420647	1379	31347	Bacteria	Bacillota	Bacilli	RF39	UBA660	RUG13868	unclassified
Cow_SGB_1054	88.76	4.49	1194521	1114	31487	Bacteria	Bacillota	Bacilli	RFN20	CAG-631	Caccosoma	unclassified
Cow_SGB_1055	86.63	7.27	1379964	1447	6066	Bacteria	Bacillota	Bacilli	RFN20	CAG-631	Caccosoma	unclassified
Cow_SGB_1056	65.92	3.15	967978	1138	2908	Bacteria	Bacillota	Bacilli	RFN20	CAG-631	Caccosoma	unclassified
Cow_SGB_1057	81.93	0	1170919	1058	24044	Bacteria	Bacillota	Bacilli	RFN20	CAG-826	UBA2450	UBA2450 sp902797795
Cow_SGB_1058	92.47	0	1152131	1125	95966	Bacteria	Pseudomonadota	Alphaproteobacteria	RF32	unclassified	unclassified	unclassified
Cow_SGB_1059	88.97	5.25	2938894	2615	8174	Bacteria	Verrucomicrobiota	Lentisphaeria	Victivallales	Victivallaceae	UBA1784	unclassified
Cow_SGB_1060	78.77	5.54	3441097	2970	7900	Bacteria	Verrucomicrobiota	Lentisphaeria	Victivallales	Victivallaceae	UBA1784	unclassified
Cow_SGB_1061	95.28	3.85	1664978	1790	17315	Bacteria	Bacillota	Bacilli	Erysipelotrichales	Erysipelotrichaceae	RGIG4607	unclassified
Cow_SGB_1062	95.28	3.23	1778299	1961	9710	Bacteria	Bacillota	Bacilli	Erysipelotrichales	Erysipelotrichaceae	RGIG4607	RGIG4607 sp017561055
Cow_SGB_1063	96.05	0	1440391	1395	32324	Bacteria	Bacillota	Bacilli	Erysipelotrichales	Erysipelotrichaceae	UBA636	unclassified
Cow_SGB_1064	94.76	0.45	1222066	1390	6871	Bacteria	Bacillota	Bacilli	Erysipelotrichales	Erysipelotrichaceae	JAHHTG01	unclassified
Cow_SGB_1065	88.69	0.55	1416252	1516	13007	Bacteria	Pseudomonadota	Alphaproteobacteria	RF32	UBA3637	CAAHEQ01	unclassified
Cow_SGB_1066	94.44	1.9	1610325	1724	10495	Bacteria	Bacillota	Bacilli	Erysipelotrichales	Erysipelotrichaceae	UBA636	UBA636 sp900546285
Cow_SGB_1067	97.19	1.12	1155110	1041	16650	Bacteria	Bacillota	Bacilli	RFN20	CAG-826	Enteromonas	unclassified
Cow_SGB_1068	86.9	3.33	1514110	1624	7790	Bacteria	Bacillota	Bacilli	Erysipelotrichales	Erysipelotrichaceae	Bulleidia	Bulleidia sp902766675
Cow_SGB_1069	80.82	4.13	1323002	1427	7481	Bacteria	Bacillota	Bacilli	Erysipelotrichales	Erysipelotrichaceae	Bulleidia	Bulleidia sp902784015
Cow_SGB_1070	85.73	1.75	1362736	1432	10474	Bacteria	Bacillota	Bacilli	Erysipelotrichales	Erysipelotrichaceae	UBA636	UBA636 sp902795865
Cow_SGB_1071	92.38	0.09	1837009	1878	12442	Bacteria	Bacillota	Bacilli	Erysipelotrichales	Erysipelotrichaceae	RUG14871	RUG14871 sp902803495
Cow_SGB_1072	99.06	0	1713610	1771	33343	Bacteria	Bacillota	Bacilli	Erysipelotrichales	Erysipelotrichaceae	Traorella	unclassified
Cow_SGB_1073	97.33	0.11	1273992	1080	147664	Bacteria	Bacillota	Bacilli	ML615J-28	CAG-313	UBA1231	unclassified
Cow_SGB_1074	81.59	2.45	1247422	1389	8916	Bacteria	Bacillota	Bacilli	Erysipelotrichales	Erysipelotrichaceae	RUG521	RUG521 sp902795525
Cow_SGB_1075	79.15	4	1329168	1348	7446	Bacteria	Bacillota	Bacilli	ML615J-28	CAG-698	CAG-698	CAG-698 sp016282055
Cow_SGB_1076	89.33	6.12	1751454	1674	26009	Bacteria	Bacillota	Bacilli	ML615J-28	CAG-698	CAG-698	unclassified
Cow_SGB_1077	92.36	4	1812104	1709	36743	Bacteria	Bacillota	Bacilli	ML615J-28	CAG-698	RGIG3506	RGIG3506 sp016280895
Cow_SGB_1078	94.67	5.79	1326943	1225	27398	Bacteria	Bacillota	Bacilli	Izemoplasmatales	UBA1188	UBA1188	UBA1188 sp016287865
Cow_SGB_1079	92.6	2.25	1025896	1140	4061	Bacteria	Bacillota	Bacilli	RFN20	UBA1709	unclassified	unclassified
Cow_SGB_1080	97.33	2.78	1666771	1465	46948	Bacteria	Bacillota	Bacilli	ML615J-28	CAG-698	unclassified	unclassified
Cow_SGB_1081	96	1.11	1701214	1658	10796	Bacteria	Bacillota	Bacilli	Acholeplasmatales	Anaeroplasmataceae	Pelethenecus	unclassified
Cow_SGB_1082	83.47	3.45	1436902	1411	8648	Bacteria	Bacillota	Bacilli	Acholeplasmatales	Anaeroplasmataceae	unclassified	unclassified
Cow_SGB_1083	92.22	1.33	2015140	1882	33375	Bacteria	Bacillota	Bacilli	Acholeplasmatales	Anaeroplasmataceae	unclassified	unclassified
Cow_SGB_1084	85.56	3.33	1388248	1416	7732	Bacteria	Bacillota	Bacilli	Acholeplasmatales	Anaeroplasmataceae	unclassified	unclassified
Cow_SGB_1085	63.24	1.75	1246435	1137	7879	Bacteria	Bacillota	Bacilli	Acholeplasmatales	Anaeroplasmataceae	unclassified	unclassified
Cow_SGB_1086	76	2.11	1466433	1345	12338	Bacteria	Bacillota	Bacilli	Acholeplasmatales	Anaeroplasmataceae	unclassified	unclassified
Cow_SGB_1087	90.18	0.67	1447262	1422	10903	Bacteria	Bacillota	Bacilli	ML615J-28	CAG-313	UBA1737	unclassified
Cow_SGB_1088	94.67	0	1439581	1348	14767	Bacteria	Bacillota	Bacilli	ML615J-28	CAG-313	UBA1737	unclassified
Cow_SGB_1089	98.67	0	1767062	1588	47400	Bacteria	Bacillota	Bacilli	ML615J-28	CAG-313	UBA1737	unclassified
Cow_SGB_1090	95.82	0	1572229	1566	10581	Bacteria	Bacillota	Bacilli	ML615J-28	CAG-313	UBA1737	unclassified
Cow_SGB_1091	98.67	1.33	2180836	2080	42271	Bacteria	Bacillota	Bacilli	ML615J-28	CAG-313	UBA1737	UBA1737 sp017398545
Cow_SGB_1092	94.67	4.11	1368024	1300	18903	Bacteria	Bacillota	Bacilli	ML615J-28	CAG-313	CAG-313	unclassified
Cow_SGB_1093	93.33	0.11	1420748	1369	23964	Bacteria	Bacillota	Bacilli	ML615J-28	CAG-313	CAG-313	unclassified
Cow_SGB_1094	87.33	0	1293659	1257	5507	Bacteria	Bacillota	Bacilli	ML615J-28	CAG-313	CAG-313	unclassified
Cow_SGB_1095	86.79	5.44	1495573	1569	6499	Bacteria	Bacillota	Bacilli	ML615J-28	CAG-313	CAG-313	CAG-313 sp003539625
Cow_SGB_1096	91.41	3.07	1298777	1281	10266	Bacteria	Bacillota	Bacilli	ML615J-28	CAG-313	CAJGCS01	unclassified
Cow_SGB_1097	97.33	0.67	1334623	1357	9577	Bacteria	Bacillota	Bacilli	ML615J-28	CAG-313	CAJGCS01	CAJGCS01 sp904501965
Cow_SGB_1098	84	2	1645633	1590	27515	Bacteria	Bacillota	Bacilli	ML615J-28	CAG-313	UMGS75	unclassified
Cow_SGB_1099	96	0.11	1264716	1186	63688	Bacteria	Bacillota	Bacilli	ML615J-28	CAG-313	UBA1231	unclassified
Cow_SGB_1100	96	1.33	1206067	1234	6668	Bacteria	Bacillota	Bacilli	ML615J-28	CAG-313	unclassified	unclassified
Cow_SGB_1101	88.67	2.02	1118942	1213	3509	Bacteria	Bacillota	Bacilli	ML615J-28	CAG-313	unclassified	unclassified
Cow_SGB_1102	94.67	6.67	1229711	1259	5730	Bacteria	Bacillota	Bacilli	ML615J-28	CAG-313	unclassified	unclassified
Cow_SGB_1103	89.08	2.9	1215328	1301	6059	Bacteria	Bacillota	Bacilli	ML615J-28	CAG-313	UBA1231	unclassified
Cow_SGB_1104	82.44	0.11	907060	993	4129	Bacteria	Bacillota	Bacilli	ML615J-28	CAG-313	UBA1231	UBA1231 sp904502205
Cow_SGB_1105	86.27	4	1336123	1284	33052	Bacteria	Bacillota	Bacilli	ML615J-28	CAG-313	UBA1231	unclassified
Cow_SGB_1106	96	2.13	1459705	1307	42784	Bacteria	Bacillota	Bacilli	ML615J-28	CAG-313	UBA1231	unclassified
Cow_SGB_1107	98.67	0.11	1350710	1239	59662	Bacteria	Bacillota	Bacilli	ML615J-28	CAG-313	UBA1231	unclassified
Cow_SGB_1108	96	0.11	1499759	1341	96861	Bacteria	Bacillota	Bacilli	ML615J-28	CAG-313	UBA1231	unclassified
Cow_SGB_1109	88.8	0.67	1295537	1131	15946	Bacteria	Bacillota	Bacilli	ML615J-28	CAG-313	UBA1231	unclassified
Cow_SGB_1110	97.33	1.44	1376390	1361	24690	Bacteria	Bacillota	Bacilli	ML615J-28	CAG-313	UBA1231	unclassified
Cow_SGB_1111	89.16	0.11	1259938	1307	13547	Bacteria	Bacillota	Bacilli	ML615J-28	CAG-313	UBA1231	unclassified
Cow_SGB_1112	86.89	0	1082984	1161	4683	Bacteria	Bacillota	Bacilli	ML615J-28	CAG-313	HGM10611	unclassified
Cow_SGB_1113	84.22	1.33	1121198	1066	38339	Bacteria	Bacillota	Bacilli	ML615J-28	CAG-313	HGM10611	unclassified
Cow_SGB_1114	83.33	2.67	1252198	1257	9974	Bacteria	Bacillota	Bacilli	ML615J-28	CAG-313	HGM10611	unclassified
Cow_SGB_1115	98.67	5.33	1925583	1836	41546	Bacteria	Bacillota	Bacilli	ML615J-28	CAG-313	HGM10611	unclassified
Cow_SGB_1116	94.12	1.7	1142292	1190	5761	Bacteria	Bacillota	Bacilli	ML615J-28	CAG-698	RGIG3506	unclassified
Cow_SGB_1117	95.15	1.33	1694054	1644	14448	Bacteria	Bacillota	Bacilli	ML615J-28	CAG-698	CAKOMG01	unclassified
Cow_SGB_1118	85.87	0	1312230	1348	6627	Bacteria	Bacillota	Bacilli	ML615J-28	CAG-698	CAKOMG01	unclassified
Cow_SGB_1119	78.89	0.67	1089368	1135	4017	Bacteria	Bacillota	Bacilli	ML615J-28	CAG-698	CAKOMG01	unclassified
Cow_SGB_1120	67.28	1.45	1257770	1280	8075	Bacteria	Bacillota	Bacilli	ML615J-28	CAG-698	CAKOMG01	unclassified
Cow_SGB_1121	82.64	3.21	1279073	1328	5121	Bacteria	Bacillota	Bacilli	ML615J-28	CAG-698	CAKOMG01	unclassified
Cow_SGB_1122	75.6	1.75	2144547	2728	20961	Bacteria	Bacillota	Bacilli	ML615J-28	CAG-698	CAKOMG01	unclassified
Cow_SGB_1123	99.33	0.99	3040979	2767	36272	Bacteria	Bacillota_A	Clostridia	Oscillospirales	Oscillospiraceae	Onthomonas	Onthomonas sp000421005
Cow_SGB_1124	99.19	0.81	3542160	3373	141803	Bacteria	Bacillota_A	Clostridia	Clostridiales	Clostridiaceae	Clostridium_X	Clostridium_X cadaveris
Cow_SGB_1125	86.81	5.51	2080488	2341	4827	Bacteria	Bacillota	Bacilli	Haloplasmatales	Turicibacteraceae	Turicibacter	unclassified
Cow_SGB_1126	51.75	3.12	1295215	1700	2516	Bacteria	Bacillota	Bacilli	Haloplasmatales	Turicibacteraceae	Turicibacter	unclassified
Cow_SGB_1127	85.62	1.85	2023624	1989	14920	Bacteria	Bacillota	Bacilli	Haloplasmatales	Turicibacteraceae	Turicibacter	Turicibacter bilis
Cow_SGB_1128	87.64	4.7	2054205	2067	9113	Bacteria	Bacillota	Bacilli	Haloplasmatales	Turicibacteraceae	Turicibacter	Turicibacter sp017888305
Cow_SGB_1129	98.67	0	1690413	1544	56483	Bacteria	Bacillota	Bacilli	ML615J-28	CAG-698	Tener-01	unclassified
Cow_SGB_1130	93.41	0	1074298	1018	19679	Bacteria	Pseudomonadota	Alphaproteobacteria	Rickettsiales	UBA1997	CALXSC01	unclassified
Cow_SGB_1131	91.55	6.44	4783467	4180	33848	Bacteria	Chloroflexota	Anaerolineae	Anaerolineales	Anaerolineaceae	Flexilinea	Flexilinea sp902774215
Cow_SGB_1132	92.73	4.12	4221480	3625	88399	Bacteria	Chloroflexota	Anaerolineae	Anaerolineales	Anaerolineaceae	Flexilinea	Flexilinea sp902791025
Cow_SGB_1133	88.64	4.85	4609406	3895	89396	Bacteria	Chloroflexota	Anaerolineae	Anaerolineales	Anaerolineaceae	Flexilinea	Flexilinea sp902786265
Cow_SGB_1134	92.31	3.24	1739816	1558	13550	Bacteria	Bacillota_A	Clostridia	UBA1212	UBA1257	UBA1257	UBA1257 sp002308775
Cow_SGB_1135	82.48	8.55	2563441	2308	34249	Bacteria	Cyanobacteriota	Vampirovibrionia	Gastranaerophilales	JAILCC01	unclassified	unclassified
Cow_SGB_1136	81.86	2.19	1941365	1948	15168	Bacteria	Bacteroidota	Kapabacteria	Kapabacteriales	UBA2268	JAAYTD01	JAAYTD01 sp017428585
Cow_SGB_1137	88.6	2.56	1848193	1799	48947	Bacteria	Cyanobacteriota	Vampirovibrionia	Gastranaerophilales	Gastranaerophilaceae	RGIG3525	unclassified
Cow_SGB_1138	82.63	0.85	1544657	1549	31458	Bacteria	Cyanobacteriota	Vampirovibrionia	Gastranaerophilales	Gastranaerophilaceae	RGIG3525	unclassified
Cow_SGB_1139	84.23	1.33	1634438	1614	16540	Bacteria	Cyanobacteriota	Vampirovibrionia	Gastranaerophilales	Gastranaerophilaceae	RGIG3525	unclassified
Cow_SGB_1140	85.46	0.85	1889124	1850	24943	Bacteria	Cyanobacteriota	Vampirovibrionia	Gastranaerophilales	RUG14156	RUG14156	RUG14156 sp902796305
Cow_SGB_1141	82.89	0.43	1851886	1820	19500	Bacteria	Cyanobacteriota	Vampirovibrionia	Gastranaerophilales	RUG14156	RUG14156	RUG14156 sp902796515
Cow_SGB_1142	81.05	2.56	1475913	1488	16042	Bacteria	Cyanobacteriota	Vampirovibrionia	Gastranaerophilales	JAILCC01	JAILCC01	unclassified
Cow_SGB_1143	82.21	3.37	1812105	1902	9493	Bacteria	Cyanobacteriota	Vampirovibrionia	Gastranaerophilales	Gastranaerophilaceae	CAG-196	CAG-196 sp902782905
Cow_SGB_1144	82.96	2.59	2152940	2135	24176	Bacteria	Cyanobacteriota	Vampirovibrionia	Gastranaerophilales	Gastranaerophilaceae	CAG-196	unclassified
Cow_SGB_1145	96.52	0.99	2152967	2136	35001	Bacteria	Bacillota	Bacilli	Lactobacillales	Enterococcaceae	Enterococcus_E	Enterococcus_E cecorum
Cow_SGB_1146	86.75	1.74	1914274	1898	43277	Bacteria	Cyanobacteriota	Vampirovibrionia	Gastranaerophilales	Gastranaerophilaceae	CAG-196	unclassified
Cow_SGB_1147	86.8	0.71	1733001	1727	34219	Bacteria	Cyanobacteriota	Vampirovibrionia	Gastranaerophilales	Gastranaerophilaceae	CAG-196	unclassified
Cow_SGB_1148	74.63	3.78	1620491	1838	5566	Bacteria	Cyanobacteriota	Vampirovibrionia	Gastranaerophilales	Gastranaerophilaceae	CAG-196	unclassified
Cow_SGB_1149	85.79	2.57	1598961	1588	27228	Bacteria	Cyanobacteriota	Vampirovibrionia	Gastranaerophilales	Gastranaerophilaceae	CAG-196	unclassified
Cow_SGB_1150	87.23	1.14	1927605	1885	72788	Bacteria	Cyanobacteriota	Vampirovibrionia	Gastranaerophilales	Gastranaerophilaceae	CAG-196	unclassified
Cow_SGB_1151	74.81	2.61	1706619	1891	8314	Bacteria	Cyanobacteriota	Vampirovibrionia	Gastranaerophilales	Gastranaerophilaceae	CAG-196	unclassified
Cow_SGB_1152	79.15	2.56	1703205	1821	11254	Bacteria	Cyanobacteriota	Vampirovibrionia	Gastranaerophilales	Gastranaerophilaceae	CAG-196	unclassified
Cow_SGB_1153	74.57	1.55	1937958	2191	14614	Bacteria	Cyanobacteriota	Vampirovibrionia	Gastranaerophilales	Gastranaerophilaceae	CAG-196	unclassified
Cow_SGB_1154	86.84	0.71	1845577	1869	83375	Bacteria	Cyanobacteriota	Vampirovibrionia	Gastranaerophilales	Gastranaerophilaceae	CAG-196	CAG-196 sp017629215
Cow_SGB_1155	51.33	0	979431	1219	2975	Bacteria	Cyanobacteriota	Vampirovibrionia	Gastranaerophilales	Gastranaerophilaceae	CAG-196	unclassified
Cow_SGB_1156	86.47	2.83	2196012	2068	34256	Bacteria	Cyanobacteriota	Vampirovibrionia	Gastranaerophilales	Gastranaerophilaceae	Avigastranaerophilus	Avigastranaerophilus sp016282705
Cow_SGB_1157	81.43	1.71	1943139	1859	18222	Bacteria	Cyanobacteriota	Vampirovibrionia	Gastranaerophilales	Gastranaerophilaceae	Avigastranaerophilus	unclassified
Cow_SGB_1158	87.23	1.14	2112353	2041	16663	Bacteria	Cyanobacteriota	Vampirovibrionia	Gastranaerophilales	Gastranaerophilaceae	Avigastranaerophilus	unclassified
Cow_SGB_1159	60.34	0	1148331	1280	5937	Bacteria	Cyanobacteriota	Vampirovibrionia	Gastranaerophilales	Gastranaerophilaceae	Avigastranaerophilus	unclassified
Cow_SGB_1160	77.57	3.48	1746897	1895	16449	Bacteria	Cyanobacteriota	Vampirovibrionia	Gastranaerophilales	Gastranaerophilaceae	Avigastranaerophilus	unclassified
Cow_SGB_1161	71.37	4.7	1907050	2176	5809	Bacteria	Cyanobacteriota	Vampirovibrionia	Gastranaerophilales	Gastranaerophilaceae	UBA1221	UBA1221 sp002309425
Cow_SGB_1162	60.47	9.88	986465	1287	2106	Bacteria	Pseudomonadota	Alphaproteobacteria	RF32	CAG-239	JAFUYI01	unclassified
Cow_SGB_1163	88.89	1.28	1988106	1974	94505	Bacteria	Cyanobacteriota	Vampirovibrionia	Gastranaerophilales	Gastranaerophilaceae	UBA6984	UBA6984 sp900321735
Cow_SGB_1164	88.32	0	1667728	1626	60237	Bacteria	Cyanobacteriota	Vampirovibrionia	Gastranaerophilales	Gastranaerophilaceae	unclassified	unclassified
Cow_SGB_1165	64.55	9.09	2135573	2377	3661	Bacteria	Spirochaetota	GWE2-31-10	GWE2-31-10	GWE2-31-10	RGIG6909	unclassified
Cow_SGB_1166	87.59	0.43	1784183	1796	21642	Bacteria	Cyanobacteriota	Vampirovibrionia	Gastranaerophilales	Gastranaerophilaceae	UBA791	UBA791 sp902783785
Cow_SGB_1167	84.9	2.66	1878562	1954	10211	Bacteria	Cyanobacteriota	Vampirovibrionia	Gastranaerophilales	Gastranaerophilaceae	UBA791	UBA791 sp902803265
Cow_SGB_1168	89.46	0.85	1970885	1874	41648	Bacteria	Cyanobacteriota	Vampirovibrionia	Gastranaerophilales	Gastranaerophilaceae	RUG841	RUG841 sp900313795
Cow_SGB_1169	90.31	0.85	1878002	1778	55883	Bacteria	Cyanobacteriota	Vampirovibrionia	Gastranaerophilales	Gastranaerophilaceae	RUG841	RUG841 sp902783835
Cow_SGB_1170	90.31	0.85	2267563	2244	24241	Bacteria	Cyanobacteriota	Vampirovibrionia	Gastranaerophilales	Gastranaerophilaceae	Avigastranaerophilus	unclassified
Cow_SGB_1171	84.53	0.85	1883570	1797	29424	Bacteria	Cyanobacteriota	Vampirovibrionia	Gastranaerophilales	Gastranaerophilaceae	RGIG2479	unclassified
Cow_SGB_1172	85.38	2.56	1866135	1765	34426	Bacteria	Cyanobacteriota	Vampirovibrionia	Gastranaerophilales	Gastranaerophilaceae	RGIG2479	unclassified
Cow_SGB_1173	82.53	1.6	2052908	2041	13474	Bacteria	Cyanobacteriota	Vampirovibrionia	Gastranaerophilales	Gastranaerophilaceae	UBA2883	UBA2883 sp900313115
Cow_SGB_1174	89.74	0.85	1859249	1722	52946	Bacteria	Cyanobacteriota	Vampirovibrionia	Gastranaerophilales	Gastranaerophilaceae	UBA2883	UBA2883 sp902797985
Cow_SGB_1175	84.42	0.52	2312000	2005	18112	Bacteria	Cyanobacteriota	Vampirovibrionia	Gastranaerophilales	Gastranaerophilaceae	UBA2883	unclassified
Cow_SGB_1176	89.74	0.85	2154469	1897	70642	Bacteria	Cyanobacteriota	Vampirovibrionia	Gastranaerophilales	Gastranaerophilaceae	UBA2883	UBA2883 sp902765215
Cow_SGB_1177	80.24	0.28	1897477	1705	14745	Bacteria	Cyanobacteriota	Vampirovibrionia	Gastranaerophilales	Gastranaerophilaceae	UBA2883	UBA2883 sp902783125
Cow_SGB_1178	84.14	0	1809555	1680	23596	Bacteria	Cyanobacteriota	Vampirovibrionia	Gastranaerophilales	Gastranaerophilaceae	UBA2883	UBA2883 sp902767275
Cow_SGB_1179	88.89	0	2153562	1938	64051	Bacteria	Cyanobacteriota	Vampirovibrionia	Gastranaerophilales	Gastranaerophilaceae	UBA2883	UBA2883 sp002481545
Cow_SGB_1180	83.78	2.25	1427924	1382	10983	Bacteria	Cyanobacteriota	Vampirovibrionia	Gastranaerophilales	Gastranaerophilaceae	UBA2883	unclassified
Cow_SGB_1181	84.68	0.56	1997640	1963	21725	Bacteria	Cyanobacteriota	Vampirovibrionia	Gastranaerophilales	Gastranaerophilaceae	CAG-196	unclassified
Cow_SGB_1182	81.23	0.85	2115099	1950	27254	Bacteria	Cyanobacteriota	Vampirovibrionia	Gastranaerophilales	Gastranaerophilaceae	CAG-196	unclassified
Cow_SGB_1183	88.03	0	2287065	2284	48404	Bacteria	Cyanobacteriota	Vampirovibrionia	Gastranaerophilales	Gastranaerophilaceae	CAG-196	CAG-196 sp902775025
Cow_SGB_1184	89.67	0	2063920	2014	109730	Bacteria	Cyanobacteriota	Vampirovibrionia	Gastranaerophilales	Gastranaerophilaceae	CAG-196	CAG-196 sp902779645
Cow_SGB_1185	85.47	1.14	2071410	2079	25299	Bacteria	Cyanobacteriota	Vampirovibrionia	Gastranaerophilales	Gastranaerophilaceae	CAG-196	CAG-196 sp902798645
Cow_SGB_1186	89.74	0.71	2167502	2091	180997	Bacteria	Cyanobacteriota	Vampirovibrionia	Gastranaerophilales	Gastranaerophilaceae	CAG-196	CAG-196 sp900321205
Cow_SGB_1187	88.03	1.36	2087335	2065	129070	Bacteria	Cyanobacteriota	Vampirovibrionia	Gastranaerophilales	Gastranaerophilaceae	CAG-196	CAG-196 sp902780525
Cow_SGB_1188	81.76	4.56	2400373	2601	7789	Bacteria	Cyanobacteriota	Vampirovibrionia	Gastranaerophilales	Gastranaerophilaceae	CAG-196	CAG-196 sp902760905
Cow_SGB_1189	89.74	0	1956354	1914	175190	Bacteria	Cyanobacteriota	Vampirovibrionia	Gastranaerophilales	Gastranaerophilaceae	CAG-196	CAG-196 sp902763805
Cow_SGB_1190	86.75	4.56	2079643	1998	139910	Bacteria	Cyanobacteriota	Vampirovibrionia	Gastranaerophilales	Gastranaerophilaceae	CAG-196	CAG-196 sp902797965
Cow_SGB_1191	86.26	3.7	2778781	2707	58037	Bacteria	Cyanobacteriota	Vampirovibrionia	Gastranaerophilales	Gastranaerophilaceae	CAG-196	CAG-196 sp016280955
Cow_SGB_1192	88.89	0.28	1986936	2024	72117	Bacteria	Cyanobacteriota	Vampirovibrionia	Gastranaerophilales	Gastranaerophilaceae	CAG-196	CAG-196 sp902777605
Cow_SGB_1193	83.34	1.99	1789049	1900	10154	Bacteria	Cyanobacteriota	Vampirovibrionia	Gastranaerophilales	Gastranaerophilaceae	CAG-196	CAG-196 sp902802935
Cow_SGB_1194	83.47	2.71	1831185	1850	14384	Bacteria	Cyanobacteriota	Vampirovibrionia	Gastranaerophilales	Gastranaerophilaceae	CAG-196	CAG-196 sp902797575
Cow_SGB_1195	89.74	0.28	1806569	1785	49346	Bacteria	Cyanobacteriota	Vampirovibrionia	Gastranaerophilales	Gastranaerophilaceae	CAG-196	unclassified
Cow_SGB_1196	84.62	0.28	1733311	1688	78069	Bacteria	Cyanobacteriota	Vampirovibrionia	Gastranaerophilales	Gastranaerophilaceae	CAG-196	CAG-196 sp902788575
Cow_SGB_1197	83.55	1.05	1948974	1926	32035	Bacteria	Cyanobacteriota	Vampirovibrionia	Gastranaerophilales	Gastranaerophilaceae	CAG-196	unclassified
Cow_SGB_1198	85.81	2.37	1822299	2096	10306	Bacteria	Cyanobacteriota	Vampirovibrionia	Gastranaerophilales	Gastranaerophilaceae	CAG-196	CAG-196 sp934747335
Cow_SGB_1199	80.58	3.7	1750980	1811	13204	Bacteria	Cyanobacteriota	Vampirovibrionia	Gastranaerophilales	Gastranaerophilaceae	CAG-196	CAG-196 sp902796585
Cow_SGB_1200	84.65	1.14	1781412	1808	13802	Bacteria	Cyanobacteriota	Vampirovibrionia	Gastranaerophilales	Gastranaerophilaceae	CAG-196	CAG-196 sp902803165
Cow_SGB_1201	86.25	8.86	1950716	1960	48585	Bacteria	Cyanobacteriota	Vampirovibrionia	Gastranaerophilales	Gastranaerophilaceae	CAG-196	unclassified
Cow_SGB_1202	85.89	1	2012958	2110	13365	Bacteria	Cyanobacteriota	Vampirovibrionia	Gastranaerophilales	Gastranaerophilaceae	CAG-196	CAG-196 sp016287985
Cow_SGB_1203	80.63	0	1681558	1674	24661	Bacteria	Cyanobacteriota	Vampirovibrionia	Gastranaerophilales	Gastranaerophilaceae	CAG-196	unclassified
Cow_SGB_1204	84.69	0	1701769	1729	27129	Bacteria	Cyanobacteriota	Vampirovibrionia	Gastranaerophilales	Gastranaerophilaceae	CAG-196	unclassified
Cow_SGB_1205	89.74	0.85	1792962	1713	94996	Bacteria	Cyanobacteriota	Vampirovibrionia	Gastranaerophilales	Gastranaerophilaceae	Scatousia	Scatousia sp900321895
Cow_SGB_1206	89.74	0.85	1954565	1945	102913	Bacteria	Cyanobacteriota	Vampirovibrionia	Gastranaerophilales	Gastranaerophilaceae	UBA2813	UBA2813 sp900319365
Cow_SGB_1207	88.89	2.56	1895273	1857	60367	Bacteria	Cyanobacteriota	Vampirovibrionia	Gastranaerophilales	Gastranaerophilaceae	UBA2813	UBA2813 sp900314375
Cow_SGB_1208	88.89	1.28	1864136	1765	187161	Bacteria	Cyanobacteriota	Vampirovibrionia	Gastranaerophilales	Gastranaerophilaceae	UBA2813	UBA2813 sp002361485
Cow_SGB_1209	82.88	1.03	1461887	1544	15061	Bacteria	Cyanobacteriota	Vampirovibrionia	Gastranaerophilales	Gastranaerophilaceae	UBA2813	UBA2813 sp902796825
Cow_SGB_1210	84.92	2.56	1696262	1694	21236	Bacteria	Cyanobacteriota	Vampirovibrionia	Gastranaerophilales	Gastranaerophilaceae	UBA2813	UBA2813 sp902766395
Cow_SGB_1211	89.74	1.71	2135359	2140	75008	Bacteria	Cyanobacteriota	Vampirovibrionia	Gastranaerophilales	Gastranaerophilaceae	UBA2813	UBA2813 sp902801985
Cow_SGB_1212	88.6	0.85	2100825	2102	47679	Bacteria	Cyanobacteriota	Vampirovibrionia	Gastranaerophilales	Gastranaerophilaceae	UBA2813	unclassified
Cow_SGB_1213	84.94	0.28	1691162	1676	18837	Bacteria	Cyanobacteriota	Vampirovibrionia	Gastranaerophilales	Gastranaerophilaceae	UBA2813	UBA2813 sp902766975
Cow_SGB_1214	80.06	1.71	1619990	1620	29087	Bacteria	Cyanobacteriota	Vampirovibrionia	Gastranaerophilales	Gastranaerophilaceae	UBA2813	UBA2813 sp902802825
Cow_SGB_1215	58.75	7.26	1439505	1871	2551	Bacteria	Cyanobacteriota	Vampirovibrionia	Gastranaerophilales	Gastranaerophilaceae	UBA2813	UBA2813 sp017470815
Cow_SGB_1216	89.46	0.85	1987673	1900	72939	Bacteria	Cyanobacteriota	Vampirovibrionia	Gastranaerophilales	Gastranaerophilaceae	UBA2813	UBA2813 sp902774905
Cow_SGB_1217	86.82	0.85	1924484	1879	74540	Bacteria	Cyanobacteriota	Vampirovibrionia	Gastranaerophilales	Gastranaerophilaceae	UBA2813	UBA2813 sp902792085
Cow_SGB_1218	82.05	0	1785283	1730	55230	Bacteria	Cyanobacteriota	Vampirovibrionia	Gastranaerophilales	Gastranaerophilaceae	UBA2813	UBA2813 sp902794035
Cow_SGB_1219	87.11	0.85	1992538	2036	21983	Bacteria	Cyanobacteriota	Vampirovibrionia	Gastranaerophilales	Gastranaerophilaceae	UBA2813	unclassified
Cow_SGB_1220	87.98	0.85	1727609	1631	63567	Bacteria	Cyanobacteriota	Vampirovibrionia	Gastranaerophilales	Gastranaerophilaceae	UBA2813	unclassified
Cow_SGB_1221	88.6	0.85	1944225	1830	144888	Bacteria	Cyanobacteriota	Vampirovibrionia	Gastranaerophilales	Gastranaerophilaceae	UBA2813	UBA2813 sp902777855
Cow_SGB_1222	88.53	1.28	1906921	1826	101459	Bacteria	Cyanobacteriota	Vampirovibrionia	Gastranaerophilales	Gastranaerophilaceae	UBA2813	UBA2813 sp902791985
Cow_SGB_1223	87.75	0.85	1853689	1757	198218	Bacteria	Cyanobacteriota	Vampirovibrionia	Gastranaerophilales	Gastranaerophilaceae	UBA2813	UBA2813 sp902788345
Cow_SGB_1224	86.89	0.85	1476632	1453	87091	Bacteria	Cyanobacteriota	Vampirovibrionia	Gastranaerophilales	Gastranaerophilaceae	SIG32	unclassified
Cow_SGB_1225	88.89	1.28	2114860	2124	54259	Bacteria	Cyanobacteriota	Vampirovibrionia	Gastranaerophilales	Gastranaerophilaceae	Zag111	Zag111 sp003258735
Cow_SGB_1226	89.36	1.42	1762724	1830	22711	Bacteria	Cyanobacteriota	Vampirovibrionia	Gastranaerophilales	Gastranaerophilaceae	Zag111	Zag111 sp002102825
Cow_SGB_1227	87.18	2.21	1887225	1889	26274	Bacteria	Cyanobacteriota	Vampirovibrionia	Gastranaerophilales	Gastranaerophilaceae	Zag111	Zag111 sp902766105
Cow_SGB_1228	83.48	2.64	1642972	1656	22171	Bacteria	Cyanobacteriota	Vampirovibrionia	Gastranaerophilales	Gastranaerophilaceae	Zag111	unclassified
Cow_SGB_1229	88.89	1.28	1974244	1867	55270	Bacteria	Cyanobacteriota	Vampirovibrionia	Gastranaerophilales	Gastranaerophilaceae	UBA1221	UBA1221 sp900320675
Cow_SGB_1230	89.74	0.85	2316800	2115	70287	Bacteria	Cyanobacteriota	Vampirovibrionia	Gastranaerophilales	Gastranaerophilaceae	UBA1221	unclassified
Cow_SGB_1231	89.74	1.71	2161547	2058	40336	Bacteria	Cyanobacteriota	Vampirovibrionia	Gastranaerophilales	Gastranaerophilaceae	UBA1221	unclassified
Cow_SGB_1232	89.74	1.28	2007831	1921	127281	Bacteria	Cyanobacteriota	Vampirovibrionia	Gastranaerophilales	Gastranaerophilaceae	UBA1221	UBA1221 sp902761735
Cow_SGB_1233	87.72	0.95	1851693	1726	36755	Bacteria	Cyanobacteriota	Vampirovibrionia	Gastranaerophilales	Gastranaerophilaceae	UBA1221	UBA1221 sp002350725
Cow_SGB_1234	88.89	1.28	1959497	1913	104095	Bacteria	Cyanobacteriota	Vampirovibrionia	Gastranaerophilales	Gastranaerophilaceae	UBA1221	UBA1221 sp902760645
Cow_SGB_1235	89.74	0.85	2322196	2239	104898	Bacteria	Cyanobacteriota	Vampirovibrionia	Gastranaerophilales	Gastranaerophilaceae	UBA1221	UBA1221 sp902777385
Cow_SGB_1236	85.47	1.92	2161166	2187	17046	Bacteria	Cyanobacteriota	Vampirovibrionia	Gastranaerophilales	Gastranaerophilaceae	UBA1221	unclassified
Cow_SGB_1237	85.47	1.85	1600005	1645	20452	Bacteria	Cyanobacteriota	Vampirovibrionia	Gastranaerophilales	Gastranaerophilaceae	Stercorousia	Stercorousia sp934691935
Cow_SGB_1238	86.75	1.28	1808303	1915	29178	Bacteria	Cyanobacteriota	Vampirovibrionia	Gastranaerophilales	Gastranaerophilaceae	Stercorousia	Stercorousia sp902795965
Cow_SGB_1239	86.79	2.56	1529167	1560	29810	Bacteria	Cyanobacteriota	Vampirovibrionia	Gastranaerophilales	Gastranaerophilaceae	Stercorousia	unclassified
Cow_SGB_1240	80.55	5.01	1599041	1767	9155	Bacteria	Cyanobacteriota	Vampirovibrionia	Gastranaerophilales	Gastranaerophilaceae	Stercorousia	Stercorousia sp902772945
Cow_SGB_1241	84.27	0	1580916	1593	16372	Bacteria	Cyanobacteriota	Vampirovibrionia	Gastranaerophilales	Gastranaerophilaceae	Stercorousia	unclassified
Cow_SGB_1242	88.89	2.14	1932814	1852	39244	Bacteria	Cyanobacteriota	Vampirovibrionia	Gastranaerophilales	Gastranaerophilaceae	Zag111	unclassified
Cow_SGB_1243	80.91	1.71	1456965	1429	45241	Bacteria	Cyanobacteriota	Vampirovibrionia	Gastranaerophilales	Gastranaerophilaceae	Zag111	unclassified
Cow_SGB_1244	83.68	0.85	1594876	1703	14386	Bacteria	Cyanobacteriota	Vampirovibrionia	Gastranaerophilales	Gastranaerophilaceae	UBA2813	unclassified
Cow_SGB_1245	94.38	5.95	1888169	1832	8979	Bacteria	Elusimicrobiota	Endomicrobia	Endomicrobiales	Endomicrobiaceae	RUG240	RUG240 sp900316875
Cow_SGB_1246	96.96	2.25	2124432	1858	37673	Bacteria	Elusimicrobiota	Endomicrobia	Endomicrobiales	Endomicrobiaceae	RUG658	RUG658 sp900321055
Cow_SGB_1247	63.81	2.43	1114642	1170	13256	Bacteria	Elusimicrobiota	Endomicrobia	Endomicrobiales	Endomicrobiaceae	RUG658	unclassified
Cow_SGB_1248	50.32	9.75	1250902	1481	2038	Bacteria	Elusimicrobiota	Endomicrobia	Endomicrobiales	Endomicrobiaceae	RUG658	unclassified
Cow_SGB_1249	80.24	6.91	1772399	1787	8868	Bacteria	Elusimicrobiota	Endomicrobia	Endomicrobiales	Endomicrobiaceae	RUG658	unclassified
Cow_SGB_1250	95.34	8.34	1736445	1562	26085	Bacteria	Elusimicrobiota	Endomicrobia	Endomicrobiales	Endomicrobiaceae	RUG658	RUG658 sp017525905
Cow_SGB_1251	50.09	0.71	748854	937	2425	Bacteria	Elusimicrobiota	Endomicrobia	Endomicrobiales	Endomicrobiaceae	RUG658	RUG658 sp902761395
Cow_SGB_1252	58.46	1.39	810768	1025	2237	Bacteria	Elusimicrobiota	Endomicrobia	Endomicrobiales	Endomicrobiaceae	RUG658	RUG658 sp902761395
Cow_SGB_1253	87.08	4.49	1409327	1410	7425	Bacteria	Elusimicrobiota	Endomicrobia	Endomicrobiales	Endomicrobiaceae	RUG658	RUG658 sp902761395
Cow_SGB_1254	85.67	2.25	1605602	1440	21213	Bacteria	Elusimicrobiota	Endomicrobia	Endomicrobiales	Endomicrobiaceae	RUG658	unclassified
Cow_SGB_1255	68.6	5.49	2380892	3257	2582	Bacteria	Pseudomonadota	Alphaproteobacteria	RUG11792	RUG11792	RUG11420	unclassified
Cow_SGB_1256	80.19	1.2	891253	923	6354	Bacteria	Pseudomonadota	Alphaproteobacteria	RUG11792	RUG11792	RUG11420	RUG11420 sp902796745
Cow_SGB_1257	71.76	9.54	3005867	4382	2930	Bacteria	Pseudomonadota	Alphaproteobacteria	RUG11792	RUG11792	RUG11420	unclassified
Cow_SGB_1258	87.61	0	885516	885	9000	Bacteria	Pseudomonadota	Alphaproteobacteria	RUG11792	RUG11792	RUG11420	RUG11420 sp902773285
Cow_SGB_1259	89.01	0.55	945849	932	25369	Bacteria	Pseudomonadota	Alphaproteobacteria	RUG11792	RUG11792	RUG11420	RUG11420 sp902798535
Cow_SGB_1260	58.4	1.93	600618	621	16373	Bacteria	Patescibacteria	Saccharimonadia	Saccharimonadales	Nanosyncoccaceae	UBA2834	unclassified
Cow_SGB_1261	86.81	0	807469	752	56550	Bacteria	Pseudomonadota	Alphaproteobacteria	RUG11792	RUG11792	RUG11420	RUG11420 sp902769055
Cow_SGB_1262	84.25	0	747058	677	24589	Bacteria	Pseudomonadota	Alphaproteobacteria	RUG11792	RUG11792	RUG14087	RUG14087 sp902796345
Cow_SGB_1263	92.17	0.95	2246818	1944	29874	Bacteria	Verrucomicrobiota	Verrucomicrobiae	Verrucomicrobiales	Akkermansiaceae	Akkermansia	unclassified
Cow_SGB_1264	93.2	0.68	2601291	2241	100003	Bacteria	Verrucomicrobiota	Verrucomicrobiae	Verrucomicrobiales	Akkermansiaceae	Akkermansia	unclassified
Cow_SGB_1265	90.47	2.38	2043532	1771	41902	Bacteria	Verrucomicrobiota	Verrucomicrobiae	Verrucomicrobiales	Akkermansiaceae	Akkermansia	unclassified
Cow_SGB_1266	88.43	1.02	2203691	1888	39283	Bacteria	Verrucomicrobiota	Verrucomicrobiae	Verrucomicrobiales	Akkermansiaceae	Akkermansia	unclassified
Cow_SGB_1267	92.28	0.68	2487909	2081	44198	Bacteria	Verrucomicrobiota	Verrucomicrobiae	Verrucomicrobiales	Akkermansiaceae	Akkermansia	unclassified
Cow_SGB_1268	76.13	4.5	2205579	2086	10201	Bacteria	Verrucomicrobiota	Verrucomicrobiae	Verrucomicrobiales	Akkermansiaceae	Akkermansia	unclassified
Cow_SGB_1269	88.51	4.01	2869013	2516	20197	Bacteria	Verrucomicrobiota	Verrucomicrobiae	Verrucomicrobiales	Akkermansiaceae	Akkermansia	Akkermansia sp017546445
Cow_SGB_1270	85	0.68	2388567	2156	31423	Bacteria	Verrucomicrobiota	Verrucomicrobiae	Verrucomicrobiales	Akkermansiaceae	Akkermansia	unclassified
Cow_SGB_1271	81.13	1.7	2183537	2133	13010	Bacteria	Verrucomicrobiota	Verrucomicrobiae	Verrucomicrobiales	Akkermansiaceae	Akkermansia	unclassified
Cow_SGB_1272	93.2	0	2481940	2144	59365	Bacteria	Verrucomicrobiota	Verrucomicrobiae	Verrucomicrobiales	Akkermansiaceae	Akkermansia	unclassified
Cow_SGB_1273	91.28	1.15	2320066	2043	38230	Bacteria	Verrucomicrobiota	Verrucomicrobiae	Verrucomicrobiales	Akkermansiaceae	Akkermansia	unclassified
Cow_SGB_1274	89.82	5.22	2500424	2265	39908	Bacteria	Verrucomicrobiota	Verrucomicrobiae	Verrucomicrobiales	Akkermansiaceae	Akkermansia	unclassified
Cow_SGB_1275	87.83	4.9	1903464	1742	14886	Bacteria	Verrucomicrobiota	Verrucomicrobiae	Verrucomicrobiales	Akkermansiaceae	Akkermansia	unclassified
Cow_SGB_1276	86.6	1.08	1977714	1794	19387	Bacteria	Verrucomicrobiota	Verrucomicrobiae	Verrucomicrobiales	Akkermansiaceae	Akkermansia	unclassified
Cow_SGB_1277	90.13	2.38	2305803	2003	25427	Bacteria	Verrucomicrobiota	Verrucomicrobiae	Verrucomicrobiales	Akkermansiaceae	Akkermansia	Akkermansia sp017379255
Cow_SGB_1278	91.84	0	2270031	1957	68685	Bacteria	Verrucomicrobiota	Verrucomicrobiae	Verrucomicrobiales	Akkermansiaceae	Akkermansia	Akkermansia sp017546845
Cow_SGB_1279	79.17	4.45	1829856	1873	6396	Bacteria	Verrucomicrobiota	Verrucomicrobiae	Verrucomicrobiales	Akkermansiaceae	Akkermansia	Akkermansia sp904502165
Cow_SGB_1280	84.31	0.34	2068500	1747	23694	Bacteria	Verrucomicrobiota	Verrucomicrobiae	Verrucomicrobiales	Akkermansiaceae	Akkermansia	unclassified
Cow_SGB_1281	58.5	5.64	1525511	1653	3567	Bacteria	Verrucomicrobiota	Verrucomicrobiae	Verrucomicrobiales	Akkermansiaceae	Akkermansia	unclassified
Cow_SGB_1282	91.23	0	2294480	2033	53167	Bacteria	Verrucomicrobiota	Verrucomicrobiae	Verrucomicrobiales	Akkermansiaceae	Akkermansia	unclassified
Cow_SGB_1283	60.02	1.54	1920274	2061	4641	Bacteria	Verrucomicrobiota	Verrucomicrobiae	Verrucomicrobiales	Akkermansiaceae	Akkermansia	unclassified
Cow_SGB_1284	74.71	1.7	2174748	2046	13270	Bacteria	Verrucomicrobiota	Verrucomicrobiae	Verrucomicrobiales	Akkermansiaceae	Akkermansia	unclassified
Cow_SGB_1285	89.18	1.02	2474833	2198	86659	Bacteria	Verrucomicrobiota	Verrucomicrobiae	Verrucomicrobiales	Akkermansiaceae	Akkermansia	Akkermansia sp017555025
Cow_SGB_1286	87.53	2.72	2468980	2217	15526	Bacteria	Verrucomicrobiota	Verrucomicrobiae	Verrucomicrobiales	Akkermansiaceae	Akkermansia	Akkermansia sp017390945
Cow_SGB_1287	89.87	3.06	2480614	2200	22447	Bacteria	Verrucomicrobiota	Verrucomicrobiae	Verrucomicrobiales	Akkermansiaceae	Akkermansia	Akkermansia sp900766865
Cow_SGB_1288	87.1	1.7	2398446	2223	14366	Bacteria	Verrucomicrobiota	Verrucomicrobiae	Verrucomicrobiales	Akkermansiaceae	Akkermansia	unclassified
Cow_SGB_1289	88.55	2.65	2444351	2067	39522	Bacteria	Verrucomicrobiota	Verrucomicrobiae	Verrucomicrobiales	Akkermansiaceae	Akkermansia	unclassified
Cow_SGB_1290	82.51	1.36	2234697	2117	12120	Bacteria	Verrucomicrobiota	Verrucomicrobiae	Verrucomicrobiales	Akkermansiaceae	Akkermansia	Akkermansia sp017555205
Cow_SGB_1291	81.36	0.68	2013844	1945	8469	Bacteria	Verrucomicrobiota	Verrucomicrobiae	Verrucomicrobiales	Akkermansiaceae	Akkermansia	unclassified
Cow_SGB_1292	71.65	2.18	1744525	1632	14438	Bacteria	Verrucomicrobiota	Verrucomicrobiae	Verrucomicrobiales	Akkermansiaceae	Akkermansia	unclassified
Cow_SGB_1293	76.2	3.95	2075741	2189	5644	Bacteria	Verrucomicrobiota	Verrucomicrobiae	Verrucomicrobiales	Akkermansiaceae	Akkermansia	unclassified
Cow_SGB_1294	92.17	0.8	2357798	2040	86676	Bacteria	Verrucomicrobiota	Verrucomicrobiae	Verrucomicrobiales	Akkermansiaceae	Akkermansia	unclassified
Cow_SGB_1295	84.43	2.04	2337302	2236	6785	Bacteria	Verrucomicrobiota	Verrucomicrobiae	Verrucomicrobiales	Akkermansiaceae	Akkermansia	unclassified
Cow_SGB_1296	79.71	2.41	2002046	1972	7511	Bacteria	Verrucomicrobiota	Verrucomicrobiae	Verrucomicrobiales	Akkermansiaceae	Akkermansia	unclassified
Cow_SGB_1297	63.01	0	1761554	1580	22794	Bacteria	Verrucomicrobiota	Verrucomicrobiae	Verrucomicrobiales	Akkermansiaceae	Akkermansia	unclassified
Cow_SGB_1298	89.02	1.02	2303969	2066	26709	Bacteria	Verrucomicrobiota	Verrucomicrobiae	Verrucomicrobiales	Akkermansiaceae	Akkermansia	Akkermansia sp904501975
Cow_SGB_1299	92.52	0.14	2535209	2250	53114	Bacteria	Verrucomicrobiota	Verrucomicrobiae	Verrucomicrobiales	Akkermansiaceae	Akkermansia	unclassified
Cow_SGB_1300	80.97	1.53	2303908	2115	13633	Bacteria	Verrucomicrobiota	Verrucomicrobiae	Verrucomicrobiales	Akkermansiaceae	Akkermansia	unclassified
Cow_SGB_1301	92.52	0	2616684	2238	65967	Bacteria	Verrucomicrobiota	Verrucomicrobiae	Verrucomicrobiales	Akkermansiaceae	Akkermansia	Akkermansia sp017549485
Cow_SGB_1302	91.51	0.68	2367350	2066	59468	Bacteria	Verrucomicrobiota	Verrucomicrobiae	Verrucomicrobiales	Akkermansiaceae	Akkermansia	unclassified
Cow_SGB_1303	77.7	2.74	1952727	1968	8094	Bacteria	Verrucomicrobiota	Verrucomicrobiae	Verrucomicrobiales	Akkermansiaceae	Akkermansia	unclassified
Cow_SGB_1304	91.89	0.71	2152958	1679	47763	Bacteria	Verrucomicrobiota	Kiritimatiellia	RFP12	UBA1067	Spyradenecus	unclassified
Cow_SGB_1305	66.09	0.4	1053665	1089	4607	Bacteria	Verrucomicrobiota	Kiritimatiellia	RFP12	UBA1067	Spyradenecus	unclassified
Cow_SGB_1306	79.86	1.35	1805174	1568	15833	Bacteria	Verrucomicrobiota	Kiritimatiellia	RFP12	UBA1067	Spyradenecus	Spyradenecus sp017558005
Cow_SGB_1307	91.89	0.71	2231792	1724	82136	Bacteria	Verrucomicrobiota	Kiritimatiellia	RFP12	UBA1067	Spyradenecus	Spyradenecus sp017646485
Cow_SGB_1308	91.22	0.76	1934705	1541	63054	Bacteria	Verrucomicrobiota	Kiritimatiellia	RFP12	UBA1067	Spyradenecus	unclassified
Cow_SGB_1309	72.12	3.24	1610069	1534	5993	Bacteria	Verrucomicrobiota	Kiritimatiellia	RFP12	UBA1067	Spyradenecus	unclassified
Cow_SGB_1310	82.5	2.03	1795614	1418	38765	Bacteria	Verrucomicrobiota	Kiritimatiellia	RFP12	UBA1067	Spyradenecus	unclassified
Cow_SGB_1311	91.67	0.74	1911927	1485	76741	Bacteria	Verrucomicrobiota	Kiritimatiellia	RFP12	UBA1067	Spyradenecus	unclassified
Cow_SGB_1312	91.43	0.71	1830672	1462	48043	Bacteria	Verrucomicrobiota	Kiritimatiellia	RFP12	UBA1067	Spyradenecus	unclassified
Cow_SGB_1313	77.54	1.38	1379048	1310	7938	Bacteria	Verrucomicrobiota	Kiritimatiellia	RFP12	UBA1067	Spyradenecus	unclassified
Cow_SGB_1314	100	0	2544367	2365	323869	Bacteria	Actinomycetota	Actinomycetia	Propionibacteriales	Propionibacteriaceae	Cutibacterium	Cutibacterium acnes
Cow_SGB_1315	76.18	0.68	1026734	965	29158	Bacteria	Verrucomicrobiota	Verrucomicrobiae	Opitutales	UBA9783	UBA3222	UBA3222 sp016286235
Cow_SGB_1316	93.73	0.99	1323484	1450	13606	Bacteria	Chloroflexota	Dehalococcoidia	Dehalococcoidales	UBA1222	UBA1222	UBA1222 sp016284035
Cow_SGB_1317	91.09	1.98	1463961	1534	21457	Bacteria	Chloroflexota	Dehalococcoidia	Dehalococcoidales	UBA1222	UBA1222	UBA1222 sp016286345
Cow_SGB_1318	78.19	7.32	1823596	1851	12338	Bacteria	Bacillota_A	Clostridia	Oscillospirales	Ruminococcaceae	RGIG3102	unclassified
Cow_SGB_1319	81.11	5.38	1990389	2030	5620	Bacteria	Bacillota_A	Clostridia	Lachnospirales	Lachnospiraceae	Stomatobaculum	Stomatobaculum sp902766415
Cow_SGB_1320	99.54	0.29	3756697	3426	520852	Bacteria	Actinomycetota	Actinomycetia	Actinomycetales	Micrococcaceae	Renibacterium	Renibacterium sp005809195
Cow_SGB_1321	98.09	4.37	5785405	4942	40773	Bacteria	Pseudomonadota	Gammaproteobacteria	Xanthomonadales	Rhodanobacteraceae	Rudaea	Rudaea sp005503555
Cow_SGB_1322	85.83	4.5	1590908	1666	6185	Bacteria	Bacillota_A	Clostridia	Oscillospirales	CAG-272	UBA1740	unclassified
Cow_SGB_1323	85.83	0	1091377	984	15449	Bacteria	Actinomycetota	Actinomycetia	Actinomycetales	Bifidobacteriaceae	RGIG7107	RGIG7107 sp017405305
Cow_SGB_1324	86.67	5.07	1324696	1281	22374	Bacteria	Actinomycetota	Actinomycetia	Actinomycetales	Bifidobacteriaceae	RGIG7107	RGIG7107 sp017386585
Cow_SGB_1325	97.5	2.92	2247900	1926	17171	Bacteria	Actinomycetota	Actinomycetia	Actinomycetales	Bifidobacteriaceae	Pseudoscardovia	Pseudoscardovia suis
Cow_SGB_1326	99.58	0	2153378	1631	119721	Bacteria	Actinomycetota	Actinomycetia	Actinomycetales	Bifidobacteriaceae	Pseudoscardovia	Pseudoscardovia sp002353815
Cow_SGB_1327	100	0	2252351	1756	118934	Bacteria	Actinomycetota	Actinomycetia	Actinomycetales	Bifidobacteriaceae	Bifidobacterium	Bifidobacterium thermophilum
Cow_SGB_1328	99.09	0.15	1967417	1602	81691	Bacteria	Actinomycetota	Actinomycetia	Actinomycetales	Bifidobacteriaceae	Bifidobacterium	Bifidobacterium boum
Cow_SGB_1329	99.56	0	1913048	1600	158702	Bacteria	Actinomycetota	Actinomycetia	Actinomycetales	Bifidobacteriaceae	Bifidobacterium	Bifidobacterium globosum
Cow_SGB_1330	90.41	0	1693411	1435	25116	Bacteria	Actinomycetota	Actinomycetia	Actinomycetales	Bifidobacteriaceae	Bifidobacterium	Bifidobacterium criceti
Cow_SGB_1331	99.94	0.22	2190080	1745	384143	Bacteria	Actinomycetota	Actinomycetia	Actinomycetales	Bifidobacteriaceae	Bifidobacterium	Bifidobacterium anseris
Cow_SGB_1332	94.37	4.9	1928522	1606	27585	Bacteria	Actinomycetota	Actinomycetia	Actinomycetales	Bifidobacteriaceae	Bifidobacterium	Bifidobacterium choerinum
Cow_SGB_1333	99.62	0.54	2138296	1768	98509	Bacteria	Actinomycetota	Actinomycetia	Actinomycetales	Bifidobacteriaceae	Bifidobacterium	Bifidobacterium merycicum
Cow_SGB_1334	86.79	1.14	1524965	1271	25234	Bacteria	Actinomycetota	Actinomycetia	Actinomycetales	Bifidobacteriaceae	Bifidobacterium	Bifidobacterium angulatum
Cow_SGB_1335	99.55	0.23	2008188	1627	97380	Bacteria	Actinomycetota	Actinomycetia	Actinomycetales	Bifidobacteriaceae	Bifidobacterium	Bifidobacterium pseudocatenulatum
Cow_SGB_1336	99.7	0.52	2025185	1669	94097	Bacteria	Actinomycetota	Actinomycetia	Actinomycetales	Bifidobacteriaceae	Bifidobacterium	Bifidobacterium ruminantium
Cow_SGB_1337	100	0	2051152	1635	730861	Bacteria	Actinomycetota	Actinomycetia	Actinomycetales	Bifidobacteriaceae	Bifidobacterium	Bifidobacterium adolescentis
Cow_SGB_1338	100	0.69	2260492	1912	179471	Bacteria	Actinomycetota	Actinomycetia	Actinomycetales	Bifidobacteriaceae	Bifidobacterium	Bifidobacterium breve
Cow_SGB_1339	99.54	0.23	2270377	1899	79605	Bacteria	Actinomycetota	Actinomycetia	Actinomycetales	Bifidobacteriaceae	Bifidobacterium	Bifidobacterium longum
Cow_SGB_1340	99.54	0	2150296	1767	226099	Bacteria	Actinomycetota	Actinomycetia	Actinomycetales	Bifidobacteriaceae	Bifidobacterium	Bifidobacterium bifidum
Cow_SGB_1341	99.67	0.93	2909448	2663	137689	Bacteria	Actinomycetota	Actinomycetia	Mycobacteriales	Mycobacteriaceae	Corynebacterium	Corynebacterium vitaeruminis
Cow_SGB_1342	88.52	1.36	2129085	2176	13570	Bacteria	Actinomycetota	Actinomycetia	Mycobacteriales	Mycobacteriaceae	Corynebacterium	Corynebacterium sp945631445
Cow_SGB_1343	92.47	1.24	2295011	2434	12810	Bacteria	Actinomycetota	Actinomycetia	Mycobacteriales	Mycobacteriaceae	Corynebacterium	Corynebacterium marinum
Cow_SGB_1344	92.22	0.73	2412481	2506	16894	Bacteria	Actinomycetota	Actinomycetia	Mycobacteriales	Mycobacteriaceae	Corynebacterium	Corynebacterium pollutisoli
Cow_SGB_1345	81.4	0.75	2028700	2104	7307	Bacteria	Actinomycetota	Actinomycetia	Mycobacteriales	Mycobacteriaceae	Corynebacterium	Corynebacterium phoceense
Cow_SGB_1346	92.52	1.49	2503876	2508	8133	Bacteria	Actinomycetota	Actinomycetia	Mycobacteriales	Mycobacteriaceae	Corynebacterium	Corynebacterium sp012837295
Cow_SGB_1347	85.44	5.84	4195959	3068	15866	Bacteria	Verrucomicrobiota	Kiritimatiellia	RFP12	unclassified	unclassified	unclassified
Cow_SGB_1348	80.54	2.48	3836912	2894	21644	Bacteria	Verrucomicrobiota	Kiritimatiellia	RFP12	unclassified	unclassified	unclassified
Cow_SGB_1349	86.37	1.18	3074091	2519	19914	Bacteria	Verrucomicrobiota	Kiritimatiellia	RFP12	UBA3636	UBA3636	unclassified
Cow_SGB_1350	84.68	1.01	3405367	2868	16639	Bacteria	Verrucomicrobiota	Kiritimatiellia	RFP12	UBA3636	UBA3636	UBA3636 sp902761575
Cow_SGB_1351	84.12	1.52	3379398	2699	15048	Bacteria	Verrucomicrobiota	Kiritimatiellia	RFP12	UBA3636	UBA3636	UBA3636 sp902793555
Cow_SGB_1352	83.62	0.71	2298674	1902	23253	Bacteria	Verrucomicrobiota	Kiritimatiellia	RFP12	UBA3636	UBA3636	unclassified
Cow_SGB_1353	84.47	3.85	3503294	2719	17029	Bacteria	Verrucomicrobiota	Kiritimatiellia	RFP12	UBA3636	UBA3636	unclassified
Cow_SGB_1354	80.4	1.82	2720842	2468	5870	Bacteria	Verrucomicrobiota	Kiritimatiellia	RFP12	UBA3636	UBA3636	UBA3636 sp002448475
Cow_SGB_1355	80.48	3.54	3002505	2471	10341	Bacteria	Verrucomicrobiota	Kiritimatiellia	RFP12	unclassified	unclassified	unclassified
Cow_SGB_1356	52.83	3.51	1869675	1873	6158	Bacteria	Bacillota_A	Clostridia	Oscillospirales	CAG-272	RGIG3947	unclassified
Cow_SGB_1357	63.74	2.71	1779308	1989	3573	Bacteria	Bacillota_A	Clostridia	Oscillospirales	CAG-272	RGIG3947	unclassified
Cow_SGB_1358	85.93	0.67	2101625	1841	35757	Bacteria	Bacillota_A	Clostridia	Oscillospirales	CAG-272	RUG12395	RUG12395 sp902778725
Cow_SGB_1359	98.36	0.55	3506582	3128	33135	Bacteria	Actinomycetota	Actinomycetia	Streptosporangiales	Streptosporangiaceae	Thermobifida	Thermobifida fusca
Cow_SGB_1360	91.56	0.47	1989712	1908	23088	Bacteria	Actinomycetota	Actinomycetia	Actinomycetales	Micrococcaceae	Nesterenkonia	unclassified
Cow_SGB_1361	80.25	0.53	2991421	3302	4789	Bacteria	Actinomycetota	Actinomycetia	Mycobacteriales	Pseudonocardiaceae	Saccharopolyspora	Saccharopolyspora rectivirgula
Cow_SGB_1362	91.85	3.86	3562252	3809	10438	Bacteria	Pseudomonadota	Gammaproteobacteria	Xanthomonadales	Xanthomonadaceae	Stenotrophomonas	unclassified
Cow_SGB_1363	88.23	1.09	2472851	2486	11671	Bacteria	Actinomycetota	Actinomycetia	Actinomycetales	Dermatophilaceae	Ornithinimicrobium	unclassified
Cow_SGB_1364	98.75	0	2532235	2378	186289	Bacteria	Actinomycetota	Actinomycetia	Actinomycetales	Actinomycetaceae	Bowdeniella	Bowdeniella massiliensis
Cow_SGB_1365	90.63	3.97	1970545	1802	9487	Bacteria	Bacteroidota	Bacteroidia	Bacteroidales	UBA4181	UBA4181	UBA4181 sp017523725
Cow_SGB_1366	98.51	0	2800603	2428	634554	Bacteria	Actinomycetota	Actinomycetia	Actinomycetales	Cellulomonadaceae	Rarobacter	Rarobacter sp900188465
Cow_SGB_1367	97.48	0.88	4327264	4107	65380	Bacteria	Actinomycetota	Actinomycetia	Mycobacteriales	Mycobacteriaceae	Rhodococcus	Rhodococcus sp012844225
Cow_SGB_1368	99.53	0.95	2760766	2283	160030	Bacteria	Actinomycetota	Actinomycetia	Actinomycetales	Actinomycetaceae	Actinomyces	Actinomyces denticolens
Cow_SGB_1369	99.53	0.95	3104648	2568	148860	Bacteria	Actinomycetota	Actinomycetia	Actinomycetales	Actinomycetaceae	Actinomyces	Actinomyces ruminicola
Cow_SGB_1370	98.65	1.61	2562419	2333	172368	Bacteria	Actinomycetota	Actinomycetia	Actinomycetales	Micrococcaceae	Micrococcus	Micrococcus luteus
Cow_SGB_1371	87.97	1.74	2477376	2452	10893	Bacteria	Actinomycetota	Actinomycetia	Actinomycetales	Micrococcaceae	Citricoccus	unclassified
Cow_SGB_1372	98.75	0	2724385	2537	67307	Bacteria	Actinomycetota	Actinomycetia	Actinomycetales	Actinomycetaceae	KH17	KH17 sp900199505
Cow_SGB_1373	89.45	2.04	1779742	1678	8501	Bacteria	Actinomycetota	Actinomycetia	Actinomycetales	Actinomycetaceae	RUG11864	RUG11864 sp902773415
Cow_SGB_1374	100	0	4168132	3744	871964	Bacteria	Actinomycetota	Actinomycetia	Actinomycetales	Cellulomonadaceae	Cellulomonas	Cellulomonas sp900114185
Cow_SGB_1375	99.21	1.73	4210595	3816	219687	Bacteria	Actinomycetota	Actinomycetia	Actinomycetales	Cellulomonadaceae	Cellulomonas	Cellulomonas sp015234515
Cow_SGB_1376	98.78	0	2731626	2597	205689	Bacteria	Actinomycetota	Actinomycetia	Propionibacteriales	Propionibacteriaceae	Arachnia	Arachnia sp000619965
Cow_SGB_1377	93.46	2.01	2772884	2890	8990	Bacteria	Actinomycetota	Actinomycetia	Propionibacteriales	Propionibacteriaceae	Arachnia	Arachnia sp012837465
Cow_SGB_1378	92	4.65	2692654	3064	9308	Bacteria	Actinomycetota	Actinomycetia	Actinomycetales	Microbacteriaceae	Microbacterium	unclassified
Cow_SGB_1379	98.55	1.52	2804916	2691	385244	Bacteria	Actinomycetota	Actinomycetia	Actinomycetales	Microbacteriaceae	Homoserinimonas	Homoserinimonas sp015234465
Cow_SGB_1380	86.66	2.39	3891097	2895	48834	Bacteria	Verrucomicrobiota	Kiritimatiellia	RFP12	JAAYLN01	RGIG5952	unclassified
Cow_SGB_1381	89.19	2.23	3832189	2944	36659	Bacteria	Verrucomicrobiota	Kiritimatiellia	RFP12	JAAYLN01	RGIG5952	unclassified
Cow_SGB_1382	85.14	5.21	4151205	3372	25285	Bacteria	Verrucomicrobiota	Kiritimatiellia	RFP12	JAAYLN01	RGIG5952	RGIG5952 sp017962605
Cow_SGB_1383	83.48	3.58	4588408	3324	21791	Bacteria	Verrucomicrobiota	Kiritimatiellia	RFP12	UBA1067	UBA1067	unclassified
Cow_SGB_1384	90.87	0.71	1759335	1499	38802	Bacteria	Verrucomicrobiota	Kiritimatiellia	RFP12	UBA1067	RGIG5050	unclassified
Cow_SGB_1385	81.08	2.28	1937370	1855	9905	Bacteria	Verrucomicrobiota	Kiritimatiellia	RFP12	UBA1067	RGIG5050	unclassified
Cow_SGB_1386	84.86	3.38	3206725	2388	27781	Bacteria	Verrucomicrobiota	Kiritimatiellia	RFP12	JAAYLN01	RGIG3612	RGIG3612 sp017458965
Cow_SGB_1387	85.3	7.26	4513537	3758	11213	Bacteria	Verrucomicrobiota	Kiritimatiellia	RFP12	UBA1067	RGIG6720	unclassified
Cow_SGB_1388	86.82	0.9	2229510	1781	25282	Bacteria	Verrucomicrobiota	Kiritimatiellia	RFP12	UBA1067	CADCBS01	CADCBS01 sp902799715
Cow_SGB_1389	84.77	1.24	1782564	1639	10864	Bacteria	Verrucomicrobiota	Kiritimatiellia	RFP12	UBA1067	CADCBS01	CADCBS01 sp902773475
Cow_SGB_1390	88.36	2.51	3295238	2535	15311	Bacteria	Verrucomicrobiota	Kiritimatiellia	RFP12	UBA1067	unclassified	unclassified
Cow_SGB_1391	88.78	5.08	4093499	3198	17865	Bacteria	Verrucomicrobiota	Kiritimatiellia	RFP12	UBA1067	UBA1731	UBA1731 sp902779565
Cow_SGB_1392	81.8	2.25	3824191	3076	21766	Bacteria	Verrucomicrobiota	Kiritimatiellia	RFP12	UBA1067	UBA1731	unclassified
Cow_SGB_1393	81.44	3.41	4155635	3390	17497	Bacteria	Verrucomicrobiota	Kiritimatiellia	RFP12	UBA1067	UBA1731	unclassified
Cow_SGB_1394	81.5	8.93	3754734	2928	19128	Bacteria	Verrucomicrobiota	Kiritimatiellia	RFP12	UBA1067	UBA1731	unclassified
Cow_SGB_1395	72.61	2.03	2958141	2389	25014	Bacteria	Verrucomicrobiota	Kiritimatiellia	RFP12	UBA1067	UBA1731	unclassified
Cow_SGB_1396	80.66	1.16	4502110	3671	15066	Bacteria	Verrucomicrobiota	Kiritimatiellia	RFP12	UBA1067	RUG572	RUG572 sp902763655
Cow_SGB_1397	84.74	2.74	4903547	3907	23645	Bacteria	Verrucomicrobiota	Kiritimatiellia	RFP12	UBA1067	RUG572	RUG572 sp902769585
Cow_SGB_1398	84.76	1.55	4481108	3882	12434	Bacteria	Verrucomicrobiota	Kiritimatiellia	RFP12	UBA1067	RUG572	RUG572 sp900320225
Cow_SGB_1399	88.69	3.69	6254443	4192	45874	Bacteria	Verrucomicrobiota	Kiritimatiellia	RFP12	UBA1067	RUG572	unclassified
Cow_SGB_1400	55.26	3.44	2168118	1700	11615	Bacteria	Verrucomicrobiota	Kiritimatiellia	RFP12	UBA1067	RUG572	unclassified
Cow_SGB_1401	79.8	3.63	3027880	2448	25207	Bacteria	Verrucomicrobiota	Kiritimatiellia	RFP12	UBA1067	RUG572	unclassified
Cow_SGB_1402	52.55	7.43	1987627	2052	3931	Bacteria	Verrucomicrobiota	Kiritimatiellia	RFP12	UBA1067	UBA1067	UBA1067 sp902799955
Cow_SGB_1403	88.78	4.08	3808006	2938	43494	Bacteria	Verrucomicrobiota	Kiritimatiellia	RFP12	UBA1067	UBA1067	UBA1067 sp902799955
Cow_SGB_1404	90.8	2.06	4298331	3474	25566	Bacteria	Verrucomicrobiota	Kiritimatiellia	RFP12	UBA1067	RUG572	RUG572 sp902779865
Cow_SGB_1405	61.44	2.73	3304999	2786	6479	Bacteria	Verrucomicrobiota	Kiritimatiellia	RFP12	UBA1067	RUG572	unclassified
Cow_SGB_1406	82.72	6.82	4379219	3387	35172	Bacteria	Verrucomicrobiota	Kiritimatiellia	RFP12	UBA1067	RUG572	unclassified
Cow_SGB_1407	87.76	2.71	5813896	4506	38820	Bacteria	Verrucomicrobiota	Kiritimatiellia	RFP12	UBA1067	RUG572	RUG572 sp902802945
Cow_SGB_1408	89.74	2.52	6137606	4816	30945	Bacteria	Verrucomicrobiota	Kiritimatiellia	RFP12	UBA1067	RUG572	RUG572 sp902761035
Cow_SGB_1409	85.45	6.98	6609905	5135	25250	Bacteria	Verrucomicrobiota	Kiritimatiellia	RFP12	UBA1067	RUG572	RUG572 sp902779075
Cow_SGB_1410	85.65	7.53	5176189	4405	12262	Bacteria	Verrucomicrobiota	Kiritimatiellia	RFP12	UBA1067	RUG572	unclassified
Cow_SGB_1411	86.22	9.44	4626916	3678	8888	Bacteria	Verrucomicrobiota	Kiritimatiellia	RFP12	UBA1067	RUG572	unclassified
Cow_SGB_1412	83.61	1.08	2746143	2497	8468	Bacteria	Verrucomicrobiota	Kiritimatiellia	RFP12	UBA1067	RUG572	RUG572 sp017411125
Cow_SGB_1413	80.54	4.25	3114024	2438	13310	Bacteria	Verrucomicrobiota	Kiritimatiellia	RFP12	UBA1067	RUG572	RUG572 sp902803135
Cow_SGB_1414	81.89	1.38	2515095	2063	25610	Bacteria	Verrucomicrobiota	Kiritimatiellia	RFP12	UBA1067	UBA1067	unclassified
Cow_SGB_1415	83.04	2.19	1861053	1630	19397	Bacteria	Verrucomicrobiota	Kiritimatiellia	RFP12	UBA1067	UBA1067	UBA1067 sp017418445
Cow_SGB_1416	87.13	1.38	3560413	2865	43009	Bacteria	Verrucomicrobiota	Kiritimatiellia	RFP12	UBA1067	UBA1067	UBA1067 sp002350535
Cow_SGB_1417	82.74	2.73	3356427	2709	31185	Bacteria	Verrucomicrobiota	Kiritimatiellia	RFP12	UBA1067	UBA1067	UBA1067 sp902780865
Cow_SGB_1418	83.34	3.79	3501112	2809	36233	Bacteria	Verrucomicrobiota	Kiritimatiellia	RFP12	UBA1067	UBA1067	UBA1067 sp902801025
Cow_SGB_1419	85.7	3.95	3477717	2796	16840	Bacteria	Verrucomicrobiota	Kiritimatiellia	RFP12	UBA1067	UBA1067	unclassified
Cow_SGB_1420	85.85	2.77	3425386	2886	23185	Bacteria	Verrucomicrobiota	Kiritimatiellia	RFP12	UBA1067	UBA1067	UBA1067 sp902761275
Cow_SGB_1421	83.46	2.07	2708262	2373	57541	Bacteria	Verrucomicrobiota	Kiritimatiellia	RFP12	UBA1067	UBA1067	UBA1067 sp902799385
Cow_SGB_1422	58.86	2.22	1744532	1700	4932	Bacteria	Verrucomicrobiota	Kiritimatiellia	RFP12	UBA1067	UBA1067	unclassified
Cow_SGB_1423	83.75	4.2	3860512	2930	21600	Bacteria	Verrucomicrobiota	Kiritimatiellia	RFP12	UBA1067	UBA1067	UBA1067 sp016284515
Cow_SGB_1424	51.84	1.38	1069049	1078	5159	Bacteria	Verrucomicrobiota	Kiritimatiellia	RFP12	UBA1067	UBA1067	UBA1067 sp017389885
Cow_SGB_1425	59.15	5.49	2021004	1918	3661	Bacteria	Verrucomicrobiota	Kiritimatiellia	RFP12	UBA1067	UBA1067	UBA1067 sp017389885
Cow_SGB_1426	77.22	4.94	3066549	2799	7351	Bacteria	Verrucomicrobiota	Kiritimatiellia	RFP12	UBA1067	UBA1067	unclassified
Cow_SGB_1427	72.21	0.9	1614010	1546	9064	Bacteria	Verrucomicrobiota	Kiritimatiellia	RFP12	UBA1067	UBA1067	UBA1067 sp002395905
Cow_SGB_1428	81.73	0.71	2354932	2082	33657	Bacteria	Verrucomicrobiota	Kiritimatiellia	RFP12	UBA1067	UBA1067	UBA1067 sp902776615
Cow_SGB_1429	87.04	4.73	2360034	2144	20342	Bacteria	Verrucomicrobiota	Kiritimatiellia	RFP12	UBA1067	UBA1067	UBA1067 sp902772905
Cow_SGB_1430	86.46	1.38	2610518	2080	96572	Bacteria	Verrucomicrobiota	Kiritimatiellia	RFP12	UBA1067	UBA1067	UBA1067 sp002351765
Cow_SGB_1431	83.75	2.03	2286154	1869	51196	Bacteria	Verrucomicrobiota	Kiritimatiellia	RFP12	UBA1067	UBA1067	UBA1067 sp902800055
Cow_SGB_1432	84.94	2.03	2383587	1987	19546	Bacteria	Verrucomicrobiota	Kiritimatiellia	RFP12	UBA1067	UBA1067	UBA1067 sp017412325
Cow_SGB_1433	82.05	6.49	2441516	2148	12191	Bacteria	Verrucomicrobiota	Kiritimatiellia	RFP12	UBA1067	UBA1067	UBA1067 sp017463935
Cow_SGB_1434	86.79	2.73	2409262	2007	16235	Bacteria	Verrucomicrobiota	Kiritimatiellia	RFP12	UBA1067	UBA1067	UBA1067 sp900320855
Cow_SGB_1435	83.75	3.07	1897223	1711	21198	Bacteria	Verrucomicrobiota	Kiritimatiellia	RFP12	UBA1067	UBA1067	UBA1067 sp902788415
Cow_SGB_1436	84.83	1.69	2345641	1846	23344	Bacteria	Verrucomicrobiota	Kiritimatiellia	RFP12	UBA1067	UBA1067	unclassified
Cow_SGB_1437	84.24	0.68	1439611	1344	15760	Bacteria	Verrucomicrobiota	Kiritimatiellia	RFP12	UBA1067	UBA1067	UBA1067 sp900321575
Cow_SGB_1438	85.07	0.07	1674242	1536	33852	Bacteria	Verrucomicrobiota	Kiritimatiellia	RFP12	UBA1067	UBA1067	unclassified
Cow_SGB_1439	80.38	2.97	2240586	1959	12346	Bacteria	Verrucomicrobiota	Kiritimatiellia	RFP12	UBA1067	UBA1067	UBA1067 sp902773015
Cow_SGB_1440	86.89	1.38	2941313	2412	25246	Bacteria	Verrucomicrobiota	Kiritimatiellia	RFP12	UBA1067	UBA1067	unclassified
Cow_SGB_1441	83.95	2.06	3447759	2795	37349	Bacteria	Verrucomicrobiota	Kiritimatiellia	RFP12	UBA1067	UBA1067	unclassified
Cow_SGB_1442	82.9	3.8	3524107	2830	11686	Bacteria	Verrucomicrobiota	Kiritimatiellia	RFP12	UBA1067	UBA1067	UBA1067 sp016288465
Cow_SGB_1443	80.55	5.54	2318254	2048	15352	Bacteria	Verrucomicrobiota	Kiritimatiellia	RFP12	UBA1067	UBA1067	UBA1067 sp016280825
Cow_SGB_1444	81.26	2.06	2381642	2011	12245	Bacteria	Verrucomicrobiota	Kiritimatiellia	RFP12	UBA1067	unclassified	unclassified
Cow_SGB_1445	84.23	2.06	2129648	1979	28181	Bacteria	Verrucomicrobiota	Kiritimatiellia	RFP12	UBA1067	UBA1067	unclassified
Cow_SGB_1446	85.65	2.03	2824424	2362	24395	Bacteria	Verrucomicrobiota	Kiritimatiellia	RFP12	JAAYLN01	unclassified	unclassified
Cow_SGB_1447	83.96	1.38	2258288	1904	11486	Bacteria	Verrucomicrobiota	Kiritimatiellia	RFP12	UBA1067	RGIG9934	unclassified
Cow_SGB_1448	67.27	0	1927888	1951	4031	Bacteria	Verrucomicrobiota	Kiritimatiellia	RFP12	UBA1067	RGIG9934	unclassified
Cow_SGB_1449	55.58	0	2033462	2145	3288	Bacteria	Verrucomicrobiota	Kiritimatiellia	RFP12	UBA1067	RGIG9934	unclassified
Cow_SGB_1450	79.36	2.59	2848629	2582	7126	Bacteria	Verrucomicrobiota	Kiritimatiellia	RFP12	UBA1067	UBA1731	unclassified
Cow_SGB_1451	64.34	1.35	1861769	1870	3986	Bacteria	Verrucomicrobiota	Kiritimatiellia	RFP12	UBA1067	UBA1731	unclassified
Cow_SGB_1452	68.83	3.55	2293621	2244	5233	Bacteria	Verrucomicrobiota	Kiritimatiellia	RFP12	UBA1067	UBA1731	unclassified
Cow_SGB_1453	80.02	3.89	2310660	2017	7640	Bacteria	Verrucomicrobiota	Kiritimatiellia	RFP12	UBA1067	UBA1067	unclassified
Cow_SGB_1454	82.24	3.1	2523587	2175	9719	Bacteria	Verrucomicrobiota	Kiritimatiellia	RFP12	UBA1067	UBA1067	unclassified
Cow_SGB_1455	62.95	1.01	2093778	1906	5491	Bacteria	Verrucomicrobiota	Kiritimatiellia	RFP12	UBA1067	UBA1067	unclassified
Cow_SGB_1456	72.49	1.69	2188889	2014	5379	Bacteria	Verrucomicrobiota	Kiritimatiellia	RFP12	UBA1067	UBA1067	unclassified
Cow_SGB_1457	55.73	5.81	2013044	2135	3076	Bacteria	Verrucomicrobiota	Kiritimatiellia	RFP12	UBA1067	UBA1067	unclassified
Cow_SGB_1458	79.82	1.69	1571623	1579	5757	Bacteria	Verrucomicrobiota	Kiritimatiellia	RFP12	UBA1067	UBA1067	UBA1067 sp017385345
Cow_SGB_1459	75.29	2.03	2188936	2230	6661	Bacteria	Verrucomicrobiota	Kiritimatiellia	RFP12	UBA1067	RGIG9934	RGIG9934 sp017646325
Cow_SGB_1460	86.19	1.38	2090312	1912	36488	Bacteria	Verrucomicrobiota	Kiritimatiellia	RFP12	UBA1067	UBA1067	unclassified
Cow_SGB_1461	80.21	0	1710507	1592	15625	Bacteria	Verrucomicrobiota	Kiritimatiellia	RFP12	UBA1067	UBA1067	unclassified
Cow_SGB_1462	82.4	1.41	2225769	1763	46041	Bacteria	Verrucomicrobiota	Kiritimatiellia	RFP12	UBA1067	UBA1067	unclassified
Cow_SGB_1463	84.38	2.73	1612925	1515	17988	Bacteria	Verrucomicrobiota	Kiritimatiellia	RFP12	UBA1067	UBA1067	UBA1067 sp017628165
Cow_SGB_1464	83.3	1.39	1833403	1634	23308	Bacteria	Verrucomicrobiota	Kiritimatiellia	RFP12	UBA1067	UBA1067	unclassified
Cow_SGB_1465	86.42	0.71	2009361	1696	44708	Bacteria	Verrucomicrobiota	Kiritimatiellia	RFP12	UBA1067	UBA1067	unclassified
Cow_SGB_1466	81.13	0.68	1851128	1615	20074	Bacteria	Verrucomicrobiota	Kiritimatiellia	RFP12	UBA1067	UBA1067	UBA1067 sp017631385
Cow_SGB_1467	82.28	2.87	2100918	1798	29740	Bacteria	Verrucomicrobiota	Kiritimatiellia	RFP12	UBA1067	UBA1067	unclassified
Cow_SGB_1468	79.46	2.36	1483593	1343	15496	Bacteria	Verrucomicrobiota	Kiritimatiellia	RFP12	UBA1067	UBA1067	unclassified
Cow_SGB_1469	83.86	2.3	2285123	2182	5998	Bacteria	Verrucomicrobiota	Kiritimatiellia	RFP12	UBA1067	UBA1067	unclassified
Cow_SGB_1470	83.85	3.63	2225964	1838	38479	Bacteria	Verrucomicrobiota	Kiritimatiellia	RFP12	UBA1067	UBA1067	unclassified
Cow_SGB_1471	80.13	2.06	2230236	1786	39857	Bacteria	Verrucomicrobiota	Kiritimatiellia	RFP12	UBA1067	UBA1067	unclassified
Cow_SGB_1472	75.02	2.03	1532296	1401	12573	Bacteria	Verrucomicrobiota	Kiritimatiellia	RFP12	UBA1067	UBA1067	UBA1067 sp017648225
Cow_SGB_1473	63.56	4.49	1551051	1741	3179	Bacteria	Verrucomicrobiota	Kiritimatiellia	RFP12	UBA1067	UBA1067	unclassified
Cow_SGB_1474	84.2	4.21	2546534	2120	29431	Bacteria	Verrucomicrobiota	Kiritimatiellia	RFP12	UBA1067	UBA1067	unclassified
Cow_SGB_1475	82.74	1.35	2078337	1771	22355	Bacteria	Verrucomicrobiota	Kiritimatiellia	RFP12	UBA1067	UBA1067	unclassified
Cow_SGB_1476	85.11	1.38	2015095	1729	23433	Bacteria	Verrucomicrobiota	Kiritimatiellia	RFP12	UBA1067	UBA1067	UBA1067 sp904502135
Cow_SGB_1477	81.84	2.73	2036021	1736	26288	Bacteria	Verrucomicrobiota	Kiritimatiellia	RFP12	UBA1067	UBA1067	unclassified
Cow_SGB_1478	88.48	5.6	3240232	3046	14933	Bacteria	Verrucomicrobiota	Kiritimatiellia	RFP12	UBA1067	UBA1067	unclassified
Cow_SGB_1479	85.11	1.38	1988312	1676	55789	Bacteria	Verrucomicrobiota	Kiritimatiellia	RFP12	UBA1067	UBA1067	unclassified
Cow_SGB_1480	85.14	0.73	4589827	4038	9487	Bacteria	Verrucomicrobiota	Lentisphaeria	UBA1407	UBA1407	UBA1407	UBA1407 sp902776645
Cow_SGB_1481	50.1	7.22	2891419	2973	2346	Bacteria	Verrucomicrobiota	Lentisphaeria	UBA1407	UBA1407	UBA1407	unclassified
Cow_SGB_1482	84.46	3.41	4782296	3725	19258	Bacteria	Verrucomicrobiota	Lentisphaeria	UBA1407	UBA1407	UBA1407	unclassified
Cow_SGB_1483	79.73	4.42	4799079	3835	13570	Bacteria	Verrucomicrobiota	Lentisphaeria	UBA1407	UBA1407	UBA1407	unclassified
Cow_SGB_1484	81.33	2.7	4659626	3577	25586	Bacteria	Verrucomicrobiota	Lentisphaeria	UBA1407	UBA1407	UBA1407	unclassified
Cow_SGB_1485	84.39	0.87	3703966	2731	74398	Bacteria	Verrucomicrobiota	Lentisphaeria	UBA1407	UBA1407	Tb-RUG-64	Tb-RUG-64 sp016288215
Cow_SGB_1486	85.98	1.61	4763260	3725	17049	Bacteria	Verrucomicrobiota	Lentisphaeria	UBA1407	UBA1407	Tb-RUG-53	Tb-RUG-53 sp016287975
Cow_SGB_1487	80.05	1.27	2303671	2173	5112	Bacteria	Verrucomicrobiota	Lentisphaeria	UBA1407	UBA1407	CACZQQ01	CACZQQ01 sp902783355
Cow_SGB_1488	61.59	0.71	1705252	1624	4662	Bacteria	Verrucomicrobiota	Lentisphaeria	UBA1407	UBA1407	RGIG1601	unclassified
Cow_SGB_1489	95.3	3.23	4292895	3934	16607	Bacteria	Bacillota_A	Clostridia	Christensenellales	CAG-74	UBA2943	UBA2943 sp900321565
Cow_SGB_1490	95.79	1.31	2366101	2047	35531	Bacteria	Desulfobacterota	Desulfovibrionia	Desulfovibrionales	Desulfovibrionaceae	Frigididesulfovibrio	unclassified
Cow_SGB_1491	51.1	1.65	825687	914	4362	Bacteria	Bacillota_A	Clostridia	Peptostreptococcales	Anaerovoracaceae	RGIG7111	unclassified
Cow_SGB_1492	56.97	4.96	929097	1003	4498	Bacteria	Bacillota_A	Clostridia	Peptostreptococcales	Anaerovoracaceae	RGIG7111	unclassified
Cow_SGB_1493	90.41	3.04	2436177	1961	43948	Bacteria	Verrucomicrobiota	Lentisphaeria	Victivallales	UBA1829	UBA1732	UBA1732 sp017540385
Cow_SGB_1494	84.63	4.43	2413801	2022	17887	Bacteria	Verrucomicrobiota	Lentisphaeria	Victivallales	UBA1829	UBA1732	unclassified
Cow_SGB_1495	85.59	5.07	2851586	2414	13262	Bacteria	Verrucomicrobiota	Lentisphaeria	Victivallales	UBA1829	UBA1732	UBA1732 sp016285335
Cow_SGB_1496	87.47	2.7	2572230	2085	29553	Bacteria	Verrucomicrobiota	Lentisphaeria	Victivallales	UBA1829	UBA1732	unclassified
Cow_SGB_1497	90.47	2.36	2952302	2300	78926	Bacteria	Verrucomicrobiota	Lentisphaeria	Victivallales	UBA1829	UBA1732	UBA1732 sp900320095
Cow_SGB_1498	88.06	5.49	2784884	2259	58088	Bacteria	Verrucomicrobiota	Lentisphaeria	Victivallales	UBA1829	UBA1732	UBA1732 sp016285345
Cow_SGB_1499	90.13	2.59	2844499	2331	158865	Bacteria	Verrucomicrobiota	Lentisphaeria	Victivallales	UBA1829	UBA1732	UBA1732 sp902774245
Cow_SGB_1500	89.8	1.58	2843435	2224	174133	Bacteria	Verrucomicrobiota	Lentisphaeria	Victivallales	UBA1829	UBA1732	UBA1732 sp902762495
Cow_SGB_1501	92.5	2.59	3237460	2618	262611	Bacteria	Verrucomicrobiota	Lentisphaeria	Victivallales	UBA1829	UBA1732	UBA1732 sp902778895
Cow_SGB_1502	92.5	2.93	2838005	2227	137164	Bacteria	Verrucomicrobiota	Lentisphaeria	Victivallales	UBA1829	UBA1732	UBA1732 sp902780135
Cow_SGB_1503	85.57	2.03	2612839	1996	114790	Bacteria	Verrucomicrobiota	Lentisphaeria	Victivallales	UBA1829	UBA1732	UBA1732 sp902802585
Cow_SGB_1504	85.99	3.04	2340909	1989	20724	Bacteria	Verrucomicrobiota	Lentisphaeria	Victivallales	UBA1829	UBA1732	unclassified
Cow_SGB_1505	82.21	3.85	2069818	1815	10132	Bacteria	Verrucomicrobiota	Lentisphaeria	Victivallales	UBA1829	UBA1732	unclassified
Cow_SGB_1506	83.91	0	2636041	2230	7245	Bacteria	Planctomycetota	Planctomycetia	Pirellulales	Thermoguttaceae	RUG695	RUG695 sp902797455
Cow_SGB_1507	89.94	1.15	2462573	1860	32586	Bacteria	Planctomycetota	Planctomycetia	Pirellulales	Thermoguttaceae	RUG695	RUG695 sp902766935
Cow_SGB_1508	89.27	1.15	2531363	2123	14737	Bacteria	Planctomycetota	Planctomycetia	Pirellulales	Thermoguttaceae	RUG695	RUG695 sp900321495
Cow_SGB_1509	91.95	1.15	3142967	2483	24733	Bacteria	Planctomycetota	Planctomycetia	Pirellulales	Thermoguttaceae	RUG695	RUG695 sp902796885
Cow_SGB_1510	93.45	0.57	4234413	2912	22281	Bacteria	Planctomycetota	Planctomycetia	Pirellulales	Thermoguttaceae	RUG369	RUG369 sp900317365
Cow_SGB_1511	92.06	0	4176755	3011	23269	Bacteria	Planctomycetota	Planctomycetia	Pirellulales	Thermoguttaceae	RUG369	RUG369 sp900318195
Cow_SGB_1512	80.23	0	2806030	2167	9743	Bacteria	Planctomycetota	Planctomycetia	Pirellulales	Thermoguttaceae	RUG369	RUG369 sp902803085
Cow_SGB_1513	88.51	0	3440189	2673	7561	Bacteria	Planctomycetota	Planctomycetia	Pirellulales	Thermoguttaceae	RUG369	RUG369 sp902772705
Cow_SGB_1514	80.26	0.1	3521678	2560	23256	Bacteria	Planctomycetota	Planctomycetia	Pirellulales	Thermoguttaceae	RUG369	RUG369 sp902786505
Cow_SGB_1515	68.64	1.71	2609118	2557	2385	Bacteria	Planctomycetota	Planctomycetia	Pirellulales	Thermoguttaceae	RUG369	unclassified
Cow_SGB_1516	89.66	0.1	3733579	3070	7144	Bacteria	Planctomycetota	Planctomycetia	Pirellulales	Thermoguttaceae	RUG369	unclassified
Cow_SGB_1517	93.68	1.72	3826281	2763	28399	Bacteria	Planctomycetota	Planctomycetia	Pirellulales	Thermoguttaceae	RUG369	unclassified
Cow_SGB_1518	92.46	0	4252945	2915	51105	Bacteria	Planctomycetota	Planctomycetia	Pirellulales	Thermoguttaceae	RUG11551	unclassified
Cow_SGB_1519	93.04	0.1	3730559	2844	16495	Bacteria	Planctomycetota	Planctomycetia	Pirellulales	Thermoguttaceae	RUG11551	unclassified
Cow_SGB_1520	95.91	0	4005097	2777	30555	Bacteria	Planctomycetota	Planctomycetia	Pirellulales	Thermoguttaceae	RUG11551	unclassified
Cow_SGB_1521	92.46	0.17	4059633	3085	14397	Bacteria	Planctomycetota	Planctomycetia	Pirellulales	Thermoguttaceae	RUG11551	RUG11551 sp902770245
Cow_SGB_1522	96.55	3.92	2499201	2229	14279	Bacteria	Verrucomicrobiota	Lentisphaeria	Victivallales	Victivallaceae	UBA1784	unclassified
Cow_SGB_1523	88.57	2.36	2641581	2326	13410	Bacteria	Verrucomicrobiota	Lentisphaeria	Victivallales	Victivallaceae	UBA1784	unclassified
Cow_SGB_1524	83.04	5.45	2637449	2453	10029	Bacteria	Verrucomicrobiota	Lentisphaeria	Victivallales	Victivallaceae	UBA1784	UBA1784 sp902783135
Cow_SGB_1525	83.03	1.42	1477082	1536	5611	Bacteria	Bacillota_A	Clostridia	Peptostreptococcales	Anaerovoracaceae	JAEEUO01	JAEEUO01 sp016286935
Cow_SGB_1526	91.47	1.9	3072769	2977	11434	Bacteria	Actinomycetota	Actinomycetia	Mycobacteriales	Mycobacteriaceae	Corynebacterium	Corynebacterium sp902782855
Cow_SGB_1527	96.33	1.38	2505206	2159	45793	Bacteria	Desulfobacterota	Desulfovibrionia	Desulfovibrionales	Desulfovibrionaceae	Desulfovibrio	Desulfovibrio sp900319575
Cow_SGB_1528	53.57	3	1339344	1573	2300	Bacteria	Desulfobacterota	Desulfovibrionia	Desulfovibrionales	Desulfovibrionaceae	WRKB01	unclassified
Cow_SGB_1529	93.57	0.03	2244433	2009	14704	Bacteria	Desulfobacterota	Desulfovibrionia	Desulfovibrionales	Desulfovibrionaceae	Desulfovibrio	unclassified
Cow_SGB_1530	56.95	1.92	2520107	3069	3292	Bacteria	Pseudomonadota	Gammaproteobacteria	Pseudomonadales	Pseudomonadaceae	Pseudomonas_E	Pseudomonas_E oleovorans
Cow_SGB_1531	95.98	1.23	3293093	3173	37769	Bacteria	Pseudomonadota	Gammaproteobacteria	Pseudomonadales	Pseudomonadaceae	Stutzerimonas	Stutzerimonas stutzeri_T
Cow_SGB_1532	99.39	3.93	4040679	3757	293900	Bacteria	Pseudomonadota	Gammaproteobacteria	Pseudomonadales	Pseudomonadaceae	Pseudomonas_H	Pseudomonas_H gallinarum
Cow_SGB_1533	84.7	2.32	5725088	6566	4274	Bacteria	Pseudomonadota	Gammaproteobacteria	Burkholderiales	Burkholderiaceae_B	Aquincola	unclassified
Cow_SGB_1534	90.08	3.02	2395913	2225	28175	Bacteria	Pseudomonadota	Gammaproteobacteria	Pseudomonadales	Pseudohongiellaceae	Pseudohongiella	unclassified
Cow_SGB_1535	96.68	3.65	2685033	2682	7190	Bacteria	Pseudomonadota	Gammaproteobacteria	Pseudomonadales	Moraxellaceae	Psychrobacter	Psychrobacter pasteurii
Cow_SGB_1536	89.94	0.36	1587188	1636	17823	Bacteria	Pseudomonadota	Alphaproteobacteria	RF32	CAG-239	Scatocola	Scatocola faecipullorum
Cow_SGB_1537	56.61	0.57	2437076	2271	3041	Bacteria	Planctomycetota	Planctomycetia	Pirellulales	Thermoguttaceae	RGIG3701	RGIG3701 sp017939795
Cow_SGB_1538	90.01	1.17	2351859	2311	25666	Bacteria	Pseudomonadota	Gammaproteobacteria	Burkholderiales	Burkholderiaceae_B	Ottowia	Ottowia sp900320815
Cow_SGB_1539	55.25	3.98	1089402	1394	2305	Bacteria	Pseudomonadota	Gammaproteobacteria	Burkholderiales	Burkholderiaceae_B	Ottowia	unclassified
Cow_SGB_1540	60.74	8.1	1126247	1409	2290	Bacteria	Pseudomonadota	Gammaproteobacteria	Burkholderiales	Rhodocyclaceae	JAFZMK01	JAFZMK01 sp017444505
Cow_SGB_1541	52.24	1.89	1046782	1322	2585	Bacteria	Pseudomonadota	Gammaproteobacteria	Burkholderiales	Rhodocyclaceae	JAFZMK01	unclassified
Cow_SGB_1542	93.46	1.03	1967109	1857	83796	Bacteria	Pseudomonadota	Gammaproteobacteria	Burkholderiales	Burkholderiaceae	Oxalobacter	Oxalobacter sp016291665
Cow_SGB_1543	90.7	2.52	2323218	1976	34762	Bacteria	UBP6	UBA1177	UBA1177	UBA1177	UBA1177	UBA1177 sp002309575
Cow_SGB_1544	93.64	1.85	2705348	2244	114807	Bacteria	UBP6	UBA1177	UBA1177	UBA1177	UBA1177	unclassified
Cow_SGB_1545	93.7	1.68	2513136	2096	422097	Bacteria	UBP6	UBA1177	UBA1177	UBA1177	UBA1177	UBA1177 sp902774115
Cow_SGB_1546	86.95	1.05	2179300	2108	10760	Bacteria	UBP6	UBA1177	UBA1177	UBA1177	UBA1177	UBA1177 sp902780365
Cow_SGB_1547	92.81	1.68	2473995	2093	65042	Bacteria	UBP6	UBA1177	UBA1177	UBA1177	UBA1177	UBA1177 sp016290135
Cow_SGB_1548	92.02	1.68	2757826	2342	48305	Bacteria	UBP6	UBA1177	UBA1177	UBA1177	UBA1177	unclassified
Cow_SGB_1549	93.33	2.08	1850045	1782	10019	Bacteria	Actinomycetota	Coriobacteriia	Coriobacteriales	Eggerthellaceae	UBA9715	unclassified
Cow_SGB_1550	93.75	0.62	1763600	1557	54957	Bacteria	Pseudomonadota	Gammaproteobacteria	Burkholderiales	Burkholderiaceae_A	Duodenibacillus	Duodenibacillus sp017628205
Cow_SGB_1551	99.38	0.93	2516436	2220	22192	Bacteria	Pseudomonadota	Gammaproteobacteria	Burkholderiales	Burkholderiaceae_A	Sutterella	Sutterella wadsworthensis_A
Cow_SGB_1552	97.71	2.01	2189629	2020	24514	Bacteria	Pseudomonadota	Gammaproteobacteria	Burkholderiales	Burkholderiaceae_A	Duodenibacillus	Duodenibacillus sp900315045
Cow_SGB_1553	98.12	0.62	1967375	1895	18168	Bacteria	Pseudomonadota	Gammaproteobacteria	Burkholderiales	Burkholderiaceae_A	Duodenibacillus	Duodenibacillus massiliensis
Cow_SGB_1554	99.95	0.16	2821264	2746	25502	Bacteria	Pseudomonadota	Gammaproteobacteria	Burkholderiales	Burkholderiaceae_A	Parasutterella	Parasutterella gallistercoris
Cow_SGB_1555	100	0.17	2900790	2632	53949	Bacteria	Pseudomonadota	Gammaproteobacteria	Burkholderiales	Burkholderiaceae_A	Parasutterella	Parasutterella excrementihominis
Cow_SGB_1556	88.31	1.2	1389026	1505	6104	Bacteria	Pseudomonadota	Gammaproteobacteria	Burkholderiales	Burkholderiaceae_A	Aphodousia	Aphodousia sp017383055
Cow_SGB_1557	53.29	2.23	523451	661	2418	Bacteria	Pseudomonadota	Gammaproteobacteria	Burkholderiales	Burkholderiaceae_A	Aphodousia	Aphodousia sp017383055
Cow_SGB_1558	59.48	1.72	1060494	1264	3014	Bacteria	Pseudomonadota	Gammaproteobacteria	Burkholderiales	Burkholderiaceae_A	Aphodousia	Aphodousia sp017646335
Cow_SGB_1559	99.64	1.93	4694557	4318	290178	Bacteria	Pseudomonadota	Alphaproteobacteria	Sphingomonadales	Sphingomonadaceae	Sphingomonas	Sphingomonas sp017418975
Cow_SGB_1560	99.66	0.45	3842636	3556	244286	Bacteria	Pseudomonadota	Alphaproteobacteria	Sphingomonadales	Sphingomonadaceae	Sphingomonas	Sphingomonas paucimobilis
Cow_SGB_1561	95.76	0.76	5916928	5707	16573	Bacteria	Pseudomonadota	Gammaproteobacteria	Burkholderiales	Burkholderiaceae_C	Achromobacter	Achromobacter dolens
Cow_SGB_1562	99.57	1.74	5248838	5295	26534	Bacteria	Pseudomonadota	Alphaproteobacteria	Rhizobiales	Rhizobiaceae	Phyllobacterium	Phyllobacterium calauticae
Cow_SGB_1563	96.04	0	2313905	2009	39083	Bacteria	Pseudomonadota	Gammaproteobacteria	Burkholderiales	Burkholderiaceae_A	Mesosutterella	Mesosutterella sp902797695
Cow_SGB_1564	100	1.14	4083146	3771	418326	Bacteria	Pseudomonadota	Alphaproteobacteria	Caulobacterales	Caulobacteraceae	PUIC01	PUIC01 sp017418605
Cow_SGB_1565	99.62	0.81	4697191	4469	71264	Bacteria	Pseudomonadota	Alphaproteobacteria	Caulobacterales	Caulobacteraceae	Caulobacter	Caulobacter vibrioides_E
Cow_SGB_1566	75.41	1.14	2157403	2466	6438	Bacteria	Pseudomonadota	Alphaproteobacteria	Caulobacterales	Caulobacteraceae	Brevundimonas	Brevundimonas sp015234495
Cow_SGB_1567	98.78	1.15	2803951	2638	59559	Bacteria	Spirochaetota	Spirochaetia	Sphaerochaetales	Sphaerochaetaceae	RUG023	RUG023 sp900315435
Cow_SGB_1568	74.05	5.25	1921935	1884	5419	Bacteria	Bacillota_A	Clostridia	Peptostreptococcales	Anaerovoracaceae	Eubacterium_B	Eubacterium_B sp017437565
Cow_SGB_1569	97.22	1.8	2169265	2021	19393	Bacteria	Bacillota_C	Negativicutes	Acidaminococcales	Acidaminococcaceae	Acidaminococcus	Acidaminococcus sp902796945
Cow_SGB_1570	99.59	0.86	4129268	4115	249965	Bacteria	Pseudomonadota	Alphaproteobacteria	Rhodobacterales	Rhodobacteraceae	Yoonia	Yoonia sp017390475
Cow_SGB_1571	99.38	0	1924318	1872	1850049	Bacteria	Bacillota	Bacilli	Lactobacillales	Lactobacillaceae	Pediococcus	Pediococcus acidilactici
Cow_SGB_1572	92.55	1.83	1854220	1933	12514	Bacteria	Bacillota	Bacilli	Lactobacillales	Lactobacillaceae	Paucilactobacillus	Paucilactobacillus nenjiangensis
Cow_SGB_1573	89.22	0.95	1744554	1945	16931	Bacteria	Bacillota	Bacilli	Lactobacillales	Lactobacillaceae	Latilactobacillus	Latilactobacillus curvatus
Cow_SGB_1574	95.74	0.68	2020742	1986	66021	Bacteria	Bacillota	Bacilli	Lactobacillales	Lactobacillaceae	Latilactobacillus	Latilactobacillus fuchuensis
Cow_SGB_1575	99.38	5.25	3442875	3313	1891636	Bacteria	Bacillota	Bacilli	Lactobacillales	Lactobacillaceae	Lactiplantibacillus	Lactiplantibacillus plantarum
Cow_SGB_1576	99.06	0	2595994	2639	2315038	Bacteria	Bacillota	Bacilli	Lactobacillales	Lactobacillaceae	Levilactobacillus	Levilactobacillus brevis
Cow_SGB_1577	99.18	0.54	1941536	1803	358179	Bacteria	Bacillota	Bacilli	Lactobacillales	Lactobacillaceae	Limosilactobacillus	Limosilactobacillus mucosae
Cow_SGB_1578	87.5	3.09	2717759	3275	3922	Bacteria	Pseudomonadota	Gammaproteobacteria	Pseudomonadales	Halomonadaceae	Halomonas	Halomonas alimentaria
Cow_SGB_1579	93.81	1.59	2660425	2238	151729	Bacteria	Bacteroidota	Bacteroidia	Bacteroidales	UBA932	Cryptobacteroides	Cryptobacteroides sp902789395
Cow_SGB_1580	87.52	0.95	2290809	2111	7148	Bacteria	Bacteroidota	Bacteroidia	Bacteroidales	UBA932	Cryptobacteroides	Cryptobacteroides sp902796455
Cow_SGB_1581	98.95	0	1924577	1847	55031	Bacteria	Bacillota	Bacilli	Lactobacillales	Lactobacillaceae	Ligilactobacillus	Ligilactobacillus salivarius
Cow_SGB_1582	99.21	0.52	1842330	1830	145867	Bacteria	Bacillota	Bacilli	Lactobacillales	Lactobacillaceae	Ligilactobacillus	Ligilactobacillus ruminis_A
Cow_SGB_1583	98.95	0	2038062	1967	62136	Bacteria	Bacillota	Bacilli	Lactobacillales	Lactobacillaceae	Ligilactobacillus	Ligilactobacillus ruminis
Cow_SGB_1584	98.39	0.31	1837322	1815	25047	Bacteria	Bacillota	Bacilli	Lactobacillales	Lactobacillaceae	Ligilactobacillus	Ligilactobacillus agilis
Cow_SGB_1585	88.12	0.97	1552482	1718	7824	Bacteria	Bacillota	Bacilli	Lactobacillales	Lactobacillaceae	Lactobacillus	Lactobacillus crispatus
Cow_SGB_1586	98.94	0.65	2179080	2327	23161	Bacteria	Bacillota	Bacilli	Lactobacillales	Lactobacillaceae	Lactobacillus	Lactobacillus amylovorus
Cow_SGB_1587	98.9	2.39	2229833	2465	21699	Bacteria	Bacillota	Bacilli	Lactobacillales	Lactobacillaceae	Limosilactobacillus	Limosilactobacillus reuteri
Cow_SGB_1588	98.64	2.41	1939023	2070	17486	Bacteria	Bacillota	Bacilli	Lactobacillales	Lactobacillaceae	Lactobacillus	Lactobacillus johnsonii
Cow_SGB_1589	63.41	0.68	827379	764	23823	Bacteria	Verrucomicrobiota	Verrucomicrobiae	Opitutales	LL51	unclassified	unclassified
Cow_SGB_1590	78.72	1.41	1135717	1027	25451	Bacteria	Verrucomicrobiota	Verrucomicrobiae	Opitutales	LL51	unclassified	unclassified
Cow_SGB_1591	53.35	5.16	1082938	1229	3808	Bacteria	Verrucomicrobiota	Verrucomicrobiae	Opitutales	LL51	unclassified	unclassified
Cow_SGB_1592	97.63	2	1975225	1736	5590	Bacteria	Pseudomonadota	Gammaproteobacteria	Enterobacterales_A	Succinivibrionaceae	WG-1	WG-1 sp900539665
Cow_SGB_1593	83.8	0.67	1861865	1871	8136	Bacteria	Bacillota_A	Clostridia	Oscillospirales	CAG-272	SIG714	unclassified
Cow_SGB_1594	71.08	3.58	1791614	2009	4092	Bacteria	Bacillota_A	Clostridia	Oscillospirales	CAG-272	SIG714	unclassified
Cow_SGB_1595	76.19	2.4	1737627	1902	4130	Bacteria	Bacillota_A	Clostridia	Oscillospirales	CAG-272	SIG714	unclassified
Cow_SGB_1596	96.64	0.69	1980916	1855	22899	Bacteria	Bacillota_A	Clostridia	Oscillospirales	unclassified	unclassified	unclassified
Cow_SGB_1597	66	1.59	1121894	1241	4491	Bacteria	Bacillota_A	Clostridia	Oscillospirales	CAG-272	JAKSPV01	unclassified
Cow_SGB_1598	92.84	0.67	2031780	1784	52063	Bacteria	Bacillota_A	Clostridia	Oscillospirales	SIG627	SIG685	unclassified
Cow_SGB_1599	95.69	0.05	2869748	2486	28255	Bacteria	Pseudomonadota	Gammaproteobacteria	Enterobacterales_A	Succinivibrionaceae	UBA2804	UBA2804 sp900319705
Cow_SGB_1600	87.64	0.19	2278180	1982	16818	Bacteria	Pseudomonadota	Gammaproteobacteria	Enterobacterales_A	Succinivibrionaceae	UBA2804	UBA2804 sp902761645
Cow_SGB_1601	97.76	0.19	2981355	2466	21130	Bacteria	Pseudomonadota	Gammaproteobacteria	Enterobacterales_A	Succinivibrionaceae	Ruminobacter	Ruminobacter sp900315145
Cow_SGB_1602	100	0.97	2861669	2382	49514	Bacteria	Pseudomonadota	Gammaproteobacteria	Enterobacterales_A	Succinivibrionaceae	Ruminobacter	Ruminobacter amylophilus
Cow_SGB_1603	96.85	0.39	2485307	2015	42960	Bacteria	Pseudomonadota	Gammaproteobacteria	Enterobacterales_A	Succinivibrionaceae	Ruminobacter	Ruminobacter sp002309455
Cow_SGB_1604	95.61	2.05	3669320	3296	8177	Bacteria	Pseudomonadota	Gammaproteobacteria	Enterobacterales_A	Succinivibrionaceae	Succinimonas	Succinimonas sp002372325
Cow_SGB_1605	85.64	0	3035766	2549	22430	Bacteria	Pseudomonadota	Gammaproteobacteria	Enterobacterales_A	Succinivibrionaceae	Succinimonas	Succinimonas sp902776415
Cow_SGB_1606	94	1.96	2040826	2060	14285	Bacteria	Bacteroidota	Bacteroidia	Flavobacteriales	Weeksellaceae	Planobacterium	Planobacterium sp015478785
Cow_SGB_1607	88.56	0.93	2398732	2216	7007	Bacteria	Pseudomonadota	Gammaproteobacteria	Enterobacterales_A	Succinivibrionaceae	Succinivibrio	Succinivibrio sp902772715
Cow_SGB_1608	94.71	0.29	1930567	1731	22750	Bacteria	Pseudomonadota	Gammaproteobacteria	Enterobacterales_A	Succinivibrionaceae	Succinivibrio	Succinivibrio sp900316175
Cow_SGB_1609	98.82	0.29	2675466	2372	54008	Bacteria	Pseudomonadota	Gammaproteobacteria	Enterobacterales_A	Succinivibrionaceae	Succinivibrio	Succinivibrio dextrinosolvens
Cow_SGB_1610	90.68	4.9	2453245	2460	6442	Bacteria	Pseudomonadota	Gammaproteobacteria	Enterobacterales_A	Succinivibrionaceae	Succinivibrio	unclassified
Cow_SGB_1611	98.82	0.29	2961737	2588	58270	Bacteria	Pseudomonadota	Gammaproteobacteria	Enterobacterales_A	Succinivibrionaceae	Succinivibrio	Succinivibrio dextrinosolvens_B
Cow_SGB_1612	98.24	0.74	3126950	2809	31508	Bacteria	Pseudomonadota	Gammaproteobacteria	Enterobacterales_A	Succinivibrionaceae	Succinivibrio	Succinivibrio dextrinosolvens_A
Cow_SGB_1613	71.17	2.42	1414888	1614	3430	Bacteria	Pseudomonadota	Gammaproteobacteria	Enterobacterales_A	Succinivibrionaceae	Succinivibrio	unclassified
Cow_SGB_1614	87.63	2.94	1865766	1949	5823	Bacteria	Pseudomonadota	Gammaproteobacteria	Enterobacterales_A	Succinivibrionaceae	Succinivibrio	Succinivibrio hippei_B
Cow_SGB_1615	99.64	0	2279682	2090	41974	Bacteria	Pseudomonadota	Gammaproteobacteria	Enterobacterales_A	Succinivibrionaceae	Succinivibrio	Succinivibrio sp003456415
Cow_SGB_1616	98.24	0.04	2488949	2163	19314	Bacteria	Pseudomonadota	Gammaproteobacteria	Enterobacterales_A	Succinivibrionaceae	Succinivibrio	Succinivibrio sp900316375
Cow_SGB_1617	97.94	0	2431080	2166	94603	Bacteria	Pseudomonadota	Gammaproteobacteria	Enterobacterales_A	Succinivibrionaceae	Succinivibrio	Succinivibrio sp000431835
Cow_SGB_1618	94.08	0.49	2482344	2143	30746	Bacteria	Pseudomonadota	Gammaproteobacteria	Enterobacterales_A	Succinivibrionaceae	Succinivibrio	Succinivibrio sp900315395
Cow_SGB_1619	96.8	0.59	2426842	2115	30264	Bacteria	Pseudomonadota	Gammaproteobacteria	Enterobacterales_A	Succinivibrionaceae	Succinivibrio	Succinivibrio sp002449335
Cow_SGB_1620	100	0	2660869	2458	23202	Bacteria	Pseudomonadota	Gammaproteobacteria	Enterobacterales_A	Succinivibrionaceae	Succinivibrio	Succinivibrio sp002473165
Cow_SGB_1621	99.22	0	2542793	2247	29722	Bacteria	Pseudomonadota	Gammaproteobacteria	Enterobacterales_A	Succinivibrionaceae	Succinivibrio	Succinivibrio sp902776275
Cow_SGB_1622	87.06	0.2	2002332	1919	13102	Bacteria	Pseudomonadota	Gammaproteobacteria	Enterobacterales_A	Succinivibrionaceae	Succinivibrio	Succinivibrio hippei_A
Cow_SGB_1623	96.84	0.57	3176591	2386	58282	Bacteria	Pseudomonadota	Gammaproteobacteria	Enterobacterales_A	Succinivibrionaceae	UBA2804	UBA2804 sp902782145
Cow_SGB_1624	54.81	0.96	1136615	1066	17073	Bacteria	Bacillota_A	Clostridia	Christensenellales	UBA1750	RGIG1439	RGIG1439 sp017413675
Cow_SGB_1625	85.81	0.71	2503911	1895	30022	Bacteria	Verrucomicrobiota	Kiritimatiellia	RFP12	UBA3636	RGIG990	RGIG990 sp017424105
Cow_SGB_1626	86.49	1.38	2331041	1815	64493	Bacteria	Verrucomicrobiota	Kiritimatiellia	RFP12	UBA3636	RGIG990	RGIG990 sp017648065
Cow_SGB_1627	85.14	0.71	2254056	1777	57559	Bacteria	Verrucomicrobiota	Kiritimatiellia	RFP12	UBA3636	RGIG990	unclassified
Cow_SGB_1628	83.8	1.34	1377402	1422	6929	Bacteria	Bacillota_A	Clostridia	Oscillospirales	Oscillospiraceae	RUG626	RUG626 sp902765975
Cow_SGB_1629	86.95	2.65	1608618	1650	9677	Bacteria	Bacillota_A	Clostridia	Oscillospirales	Oscillospiraceae	RUG626	RUG626 sp900320765
Cow_SGB_1630	96.76	0.89	1709178	1643	24451	Bacteria	Bacillota_A	Clostridia	Oscillospirales	Oscillospiraceae	RUG626	RUG626 sp900317385
Cow_SGB_1631	57.47	3.64	1143075	1455	2554	Bacteria	Bacillota_A	Clostridia	Oscillospirales	Oscillospiraceae	RUG626	RUG626 sp017439425
Cow_SGB_1632	51.17	0.29	857391	980	19021	Bacteria	Bacteroidota	Bacteroidia	Cytophagales	Amoebophilaceae	unclassified	unclassified
Cow_SGB_1633	51.04	1.09	515297	489	24038	Bacteria	Bacteroidota	Bacteroidia	Cytophagales	Amoebophilaceae	unclassified	unclassified
Cow_SGB_1634	90.56	0.84	1823968	1838	22273	Bacteria	Pseudomonadota	Gammaproteobacteria	Burkholderiales	Burkholderiaceae_C	Oligella	Oligella sp012518515
Cow_SGB_1635	98.19	1.96	2216368	2181	36677	Bacteria	Pseudomonadota	Gammaproteobacteria	Burkholderiales	Burkholderiaceae_C	Oligella	unclassified
Cow_SGB_1636	50.43	5.12	953120	1176	3014	Bacteria	Bacillota_A	Clostridia	Peptostreptococcales	Anaerovoracaceae	CAG-238	unclassified
Cow_SGB_1637	91.67	0	1917101	1914	44538	Bacteria	Bacillota_A	Clostridia	Peptostreptococcales	Anaerovoracaceae	CAG-238	unclassified
Cow_SGB_1638	52.78	3.14	1069069	1359	2347	Bacteria	Bacillota_A	Clostridia	Peptostreptococcales	Anaerovoracaceae	RGIG7179	unclassified
Cow_SGB_1639	83.64	2.34	1747662	1714	12264	Bacteria	Bacillota_A	Clostridia	Peptostreptococcales	Anaerovoracaceae	UBA3871	UBA3871 sp016280485
Cow_SGB_1640	97.87	0	1983281	1819	22485	Bacteria	Bacillota_A	Clostridia	Peptostreptococcales	Anaerovoracaceae	UBA3871	UBA3871 sp002392265
Cow_SGB_1641	93.77	3.07	1614120	1692	17627	Bacteria	Bacillota_A	Clostridia	Peptostreptococcales	Anaerovoracaceae	Fimisoma	unclassified
Cow_SGB_1642	98.56	0	2219984	2113	89555	Bacteria	Bacillota_A	Clostridia	Peptostreptococcales	Anaerovoracaceae	RUG11894	RUG11894 sp902773665
Cow_SGB_1643	94.68	0.35	2151142	1983	24782	Bacteria	Bacillota_A	Clostridia	Peptostreptococcales	Anaerovoracaceae	RUG11894	unclassified
Cow_SGB_1644	54.23	9.09	1932083	2403	2608	Bacteria	Bacillota_A	Clostridia	Peptostreptococcales	Anaerovoracaceae	RUG11894	unclassified
Cow_SGB_1645	80.52	1.72	2138435	2022	21723	Bacteria	Bacillota_A	Clostridia	Peptostreptococcales	Anaerovoracaceae	RUG11894	unclassified
Cow_SGB_1646	87.27	0.24	1579676	1565	11299	Bacteria	Bacillota_A	Clostridia	Peptostreptococcales	Anaerovoracaceae	RUG11894	unclassified
Cow_SGB_1647	97.4	0	1725128	1572	67224	Bacteria	Bacillota_A	Clostridia	Peptostreptococcales	Anaerovoracaceae	RUG13409	RUG13409 sp017619905
Cow_SGB_1648	89.22	7.51	1712075	1817	6876	Bacteria	Bacillota_A	Clostridia	Peptostreptococcales	Anaerovoracaceae	RUG13409	RUG13409 sp017442785
Cow_SGB_1649	82.54	5.99	1524176	1689	4948	Bacteria	Bacillota_A	Clostridia	Peptostreptococcales	Anaerovoracaceae	RUG13409	RUG13409 sp017523605
Cow_SGB_1650	54.43	8.42	993494	1242	2151	Bacteria	Bacillota_A	Clostridia	Peptostreptococcales	Anaerovoracaceae	RUG13409	RUG13409 sp017523605
Cow_SGB_1651	84.31	7.76	1497310	1479	12694	Bacteria	Bacillota_A	Clostridia	Peptostreptococcales	Anaerovoracaceae	RUG13409	RUG13409 sp017437745
Cow_SGB_1652	94.99	0.27	2066208	1822	155710	Bacteria	Bacillota_A	Clostridia	Peptostreptococcales	Anaerovoracaceae	RUG13409	unclassified
Cow_SGB_1653	81.35	2.15	1884359	1888	9661	Bacteria	Bacillota_A	Clostridia	Peptostreptococcales	Anaerovoracaceae	RUG13409	RUG13409 sp902788795
Cow_SGB_1654	92.67	4.16	1817210	1751	10371	Bacteria	Bacillota_A	Clostridia	Peptostreptococcales	Anaerovoracaceae	RGIG2707	RGIG2707 sp016283945
Cow_SGB_1655	85.27	4.96	2034102	1983	10669	Bacteria	Bacillota_A	Clostridia	Peptostreptococcales	Anaerovoracaceae	RGIG2707	RGIG2707 sp016284575
Cow_SGB_1656	51.93	2.48	986608	1113	2924	Bacteria	Bacillota_A	Clostridia	Peptostreptococcales	Anaerovoracaceae	JAKSSR01	unclassified
Cow_SGB_1657	86.02	6.32	1898197	2071	5393	Bacteria	Bacillota_A	Clostridia	Peptostreptococcales	Anaerovoracaceae	RGIG2707	RGIG2707 sp017428655
Cow_SGB_1658	84.21	4.14	1996683	1959	7819	Bacteria	Bacillota_A	Clostridia	Peptostreptococcales	Anaerovoracaceae	RGIG2707	RGIG2707 sp016281165
Cow_SGB_1659	84.2	9.4	2049746	1982	14418	Bacteria	Bacillota_A	Clostridia	Peptostreptococcales	Anaerovoracaceae	RGIG2707	unclassified
Cow_SGB_1660	52.53	2.84	1140629	1197	7526	Bacteria	Bacillota_A	Clostridia	Peptostreptococcales	Anaerovoracaceae	Eubacterium_B	Eubacterium_B sp017515765
Cow_SGB_1661	81.03	3.83	1704375	1712	6459	Bacteria	Bacillota_A	Clostridia	Peptostreptococcales	Anaerovoracaceae	Eubacterium_T	Eubacterium_T sp017419895
Cow_SGB_1662	91.75	0.71	1867841	1734	21794	Bacteria	Bacillota_A	Clostridia	Peptostreptococcales	Anaerovoracaceae	Eubacterium_T	unclassified
Cow_SGB_1663	51.72	0	1037140	920	20594	Bacteria	Bacillota_A	Clostridia	Peptostreptococcales	Anaerovoracaceae	Hornefia	Hornefia sp017425345
Cow_SGB_1664	93.96	0.24	1604338	1483	11973	Bacteria	Bacillota_A	Clostridia	Peptostreptococcales	Anaerovoracaceae	Eubacterium_T	Eubacterium_T sp902784035
Cow_SGB_1665	98.94	0	2020939	1767	44463	Bacteria	Bacillota_A	Clostridia	Peptostreptococcales	Anaerovoracaceae	Eubacterium_T	Eubacterium_T pyruvativorans
Cow_SGB_1666	87.88	0.35	1747779	1874	4586	Bacteria	Bacillota_A	Clostridia	Peptostreptococcales	Anaerovoracaceae	Hornefia	Hornefia butyriciproducens
Cow_SGB_1667	89.36	1.48	1734003	1742	7072	Bacteria	Bacillota_A	Clostridia	Peptostreptococcales	Anaerovoracaceae	Eubacterium_B	Eubacterium_B sp902803185
Cow_SGB_1668	79.02	2.16	1425960	1547	4928	Bacteria	Bacillota_A	Clostridia	Peptostreptococcales	Anaerovoracaceae	RUG13615	unclassified
Cow_SGB_1669	100	0	2008704	1801	62474	Bacteria	Bacillota_A	Clostridia	Peptostreptococcales	Anaerovoracaceae	RUG13615	RUG13615 sp902790905
Cow_SGB_1670	83.75	3.19	1565342	1596	11633	Bacteria	Bacillota_A	Clostridia	Peptostreptococcales	Anaerovoracaceae	Lentihominibacter	Lentihominibacter sp902787725
Cow_SGB_1671	95.39	0	2285431	2169	113815	Bacteria	Bacillota_A	Clostridia	Peptostreptococcales	Anaerovoracaceae	Lentihominibacter	Lentihominibacter sp902763505
Cow_SGB_1672	80.38	2.48	1796459	1849	9298	Bacteria	Bacillota_A	Clostridia	Peptostreptococcales	Anaerovoracaceae	Lentihominibacter	Lentihominibacter sp902772685
Cow_SGB_1673	84.4	0	2208635	1980	104683	Bacteria	Bacillota_A	Clostridia	Peptostreptococcales	Anaerovoracaceae	Lentihominibacter	Lentihominibacter sp902786815
Cow_SGB_1674	89.76	0.71	2076014	1910	92619	Bacteria	Bacillota_A	Clostridia	Peptostreptococcales	Anaerovoracaceae	Lentihominibacter	Lentihominibacter sp902795135
Cow_SGB_1675	96.81	0	1716975	1610	18250	Bacteria	Bacillota_A	Clostridia	Peptostreptococcales	Anaerovoracaceae	Baileyella	Baileyella intestinalis
Cow_SGB_1676	91.11	1.06	2167304	2006	14503	Bacteria	Bacillota_A	Clostridia	Peptostreptococcales	Anaerovoracaceae	RUG099	unclassified
Cow_SGB_1677	96.45	0.71	1720564	1633	66706	Bacteria	Bacillota_A	Clostridia	Peptostreptococcales	Anaerovoracaceae	JALCRY01	unclassified
Cow_SGB_1678	96.42	1.51	1517085	1407	30013	Bacteria	Bacillota_A	Clostridia	Lachnospirales	Lachnospiraceae	RUG14319	RUG14319 sp902797845
Cow_SGB_1679	87.53	5.66	3778523	3610	6320	Bacteria	Verrucomicrobiota	Lentisphaeria	Victivallales	UBA1829	RGIG8244	unclassified
Cow_SGB_1680	93.71	0.71	1751095	1580	87078	Bacteria	Bacillota_A	Clostridia	Peptostreptococcales	Anaerovoracaceae	RUG099	RUG099 sp900318105
Cow_SGB_1681	85.79	4.26	1612537	1552	15536	Bacteria	Bacillota_A	Clostridia	Peptostreptococcales	Anaerovoracaceae	RUG099	RUG099 sp902760855
Cow_SGB_1682	95.74	1.42	1891618	1703	72035	Bacteria	Bacillota_A	Clostridia	Peptostreptococcales	Anaerovoracaceae	RUG099	RUG099 sp902773835
Cow_SGB_1683	73	5.21	1212957	1286	6237	Bacteria	Bacillota_A	Clostridia	Peptostreptococcales	Anaerovoracaceae	RUG099	RUG099 sp017404265
Cow_SGB_1684	68.24	2.96	976533	1129	3625	Bacteria	Bacillota_A	Clostridia	Peptostreptococcales	Anaerovoracaceae	RUG099	RUG099 sp017404265
Cow_SGB_1685	96.45	2.13	2072437	1876	79794	Bacteria	Bacillota_A	Clostridia	Peptostreptococcales	Anaerovoracaceae	RUG099	RUG099 sp902776285
Cow_SGB_1686	91.2	2.13	2010288	1924	21771	Bacteria	Bacillota_A	Clostridia	Peptostreptococcales	Anaerovoracaceae	RUG099	RUG099 sp900317675
Cow_SGB_1687	96.3	0.71	3256017	2808	59664	Bacteria	Bacillota_A	Clostridia	Peptostreptococcales	Anaerovoracaceae	RUG099	RUG099 sp902774265
Cow_SGB_1688	98.69	0.71	2897730	2572	111616	Bacteria	Bacillota_A	Clostridia	Peptostreptococcales	Anaerovoracaceae	RUG099	RUG099 sp902786855
Cow_SGB_1689	76.8	2.19	1900572	2047	6118	Bacteria	Bacillota_A	Clostridia	Peptostreptococcales	Anaerovoracaceae	RUG099	unclassified
Cow_SGB_1690	94.41	3.19	2249321	2014	48322	Bacteria	Bacillota_A	Clostridia	Peptostreptococcales	Anaerovoracaceae	RUG099	RUG099 sp902779185
Cow_SGB_1691	98.58	0.71	2022870	1822	53447	Bacteria	Bacillota_A	Clostridia	Peptostreptococcales	Anaerovoracaceae	RUG099	RUG099 sp900320285
Cow_SGB_1692	93.17	3.01	2073355	2119	15315	Bacteria	Bacillota_A	Clostridia	Peptostreptococcales	Anaerovoracaceae	RUG099	RUG099 sp902780815
Cow_SGB_1693	99.82	0.71	2252933	2106	180064	Bacteria	Bacillota_A	Clostridia	Peptostreptococcales	Anaerovoracaceae	RUG099	RUG099 sp902775345
Cow_SGB_1694	93.92	5.32	2235335	2071	52706	Bacteria	Bacillota_A	Clostridia	Peptostreptococcales	Anaerovoracaceae	RUG099	RUG099 sp902801255
Cow_SGB_1695	95.39	0.71	1953425	1782	61654	Bacteria	Bacillota_A	Clostridia	Peptostreptococcales	Anaerovoracaceae	RUG099	RUG099 sp900315485
Cow_SGB_1696	81.05	1.42	1762696	1813	7037	Bacteria	Bacillota_A	Clostridia	Peptostreptococcales	Anaerovoracaceae	RUG099	RUG099 sp902765035
Cow_SGB_1697	97.89	0.71	2501825	2287	102307	Bacteria	Bacillota_A	Clostridia	Peptostreptococcales	Anaerovoracaceae	RUG099	RUG099 sp902786355
Cow_SGB_1698	99.27	0.73	1997526	1824	64690	Bacteria	Bacillota_A	Clostridia	Peptostreptococcales	Anaerovoracaceae	RUG099	RUG099 sp902778585
Cow_SGB_1699	87.01	3.69	2185452	2264	10429	Bacteria	Bacillota_A	Clostridia	Peptostreptococcales	Anaerovoracaceae	RUG099	RUG099 sp902790885
Cow_SGB_1700	90.8	1.6	1950639	1733	49603	Bacteria	Bacillota_A	Clostridia	Peptostreptococcales	Anaerovoracaceae	RUG099	RUG099 sp902795265
Cow_SGB_1701	89.89	4.96	1734444	1696	14085	Bacteria	Bacillota_A	Clostridia	Peptostreptococcales	Anaerovoracaceae	RUG099	RUG099 sp902788245
Cow_SGB_1702	92.66	0.71	1872461	1743	19756	Bacteria	Bacillota_A	Clostridia	Peptostreptococcales	Anaerovoracaceae	RUG099	RUG099 sp902790965
Cow_SGB_1703	93.62	0.78	1972268	1754	103986	Bacteria	Bacillota_A	Clostridia	Peptostreptococcales	Anaerovoracaceae	RUG099	RUG099 sp902798745
Cow_SGB_1704	93.38	1.54	2456742	2166	23615	Bacteria	Bacillota_A	Clostridia	Peptostreptococcales	Anaerovoracaceae	RUG099	unclassified
Cow_SGB_1705	82.25	4.94	2103760	2307	5024	Bacteria	Bacillota_A	Clostridia	Peptostreptococcales	Anaerovoracaceae	RUG099	RUG099 sp902774195
Cow_SGB_1706	86.74	2.13	2089864	2043	10172	Bacteria	Bacillota_A	Clostridia	Peptostreptococcales	Anaerovoracaceae	RUG099	RUG099 sp902793875
Cow_SGB_1707	94.24	5.38	1627833	1658	10191	Bacteria	Bacillota_A	Clostridia	Peptostreptococcales	Anaerovoracaceae	RUG754	RUG754 sp016284485
Cow_SGB_1708	98.58	0.24	1821360	1697	58454	Bacteria	Bacillota_A	Clostridia	Peptostreptococcales	Anaerovoracaceae	RUG754	RUG754 sp900315895
Cow_SGB_1709	91.37	2.15	1591055	1637	7605	Bacteria	Bacillota_A	Clostridia	Peptostreptococcales	Anaerovoracaceae	RUG754	unclassified
Cow_SGB_1710	50.77	8.1	1241601	1578	2090	Bacteria	unclassified	unclassified	unclassified	unclassified	unclassified	unclassified
Cow_SGB_1711	95.63	0.71	1692793	1668	17766	Bacteria	Bacillota_A	Clostridia	Peptostreptococcales	Anaerovoracaceae	RUG754	RUG754 sp902780845
Cow_SGB_1712	89.01	0	1783591	1737	29370	Bacteria	Bacillota_A	Clostridia	Peptostreptococcales	Anaerovoracaceae	RUG754	RUG754 sp902778565
Cow_SGB_1713	98.82	0	1454052	1295	87484	Bacteria	Bacillota_A	Clostridia	Peptostreptococcales	Anaerovoracaceae	Eubacterium_B	Eubacterium_B sp902776725
Cow_SGB_1714	84.13	1.18	1488283	1334	29212	Bacteria	Bacillota_A	Clostridia	Peptostreptococcales	Anaerovoracaceae	Eubacterium_B	Eubacterium_B sp017445315
Cow_SGB_1715	90.43	0	1663106	1438	59781	Bacteria	Bacillota_A	Clostridia	Peptostreptococcales	Anaerovoracaceae	Eubacterium_B	unclassified
Cow_SGB_1716	95.27	0	1546429	1325	41443	Bacteria	Bacillota_A	Clostridia	Peptostreptococcales	Anaerovoracaceae	Eubacterium_B	unclassified
Cow_SGB_1717	75.2	1.34	1743698	1898	6858	Bacteria	Bacillota_A	Clostridia	Oscillospirales	Butyricicoccaceae	RGIG1902	RGIG1902 sp017421885
Cow_SGB_1718	91.61	0.84	2161093	2153	18919	Bacteria	Bacillota_A	Clostridia	Oscillospirales	Butyricicoccaceae	RGIG1902	RGIG1902 sp017407765
Cow_SGB_1719	62.41	2.59	930899	1093	3166	Bacteria	Bacillota_A	Clostridia	Oscillospirales	Butyricicoccaceae	RGIG1902	unclassified
Cow_SGB_1720	95.97	0	2140733	1969	95904	Bacteria	Bacillota_A	Clostridia	Oscillospirales	Butyricicoccaceae	RGIG1902	RGIG1902 sp017396925
Cow_SGB_1721	87.21	0.35	2541085	2429	12234	Bacteria	Bacillota_A	Clostridia	Saccharofermentanales	Saccharofermentanaceae	Saccharofermentans	unclassified
Cow_SGB_1722	57.74	0.44	1464668	1558	4846	Bacteria	Bacillota_A	Clostridia	Saccharofermentanales	Saccharofermentanaceae	Saccharofermentans	Saccharofermentans sp024695505
Cow_SGB_1723	94.19	0.71	2580883	2306	38357	Bacteria	Bacillota_A	Clostridia	Saccharofermentanales	Saccharofermentanaceae	Saccharofermentans	Saccharofermentans sp024695505
Cow_SGB_1724	93.62	0	2610798	2322	116165	Bacteria	Bacillota_A	Clostridia	Saccharofermentanales	Saccharofermentanaceae	Saccharofermentans	Saccharofermentans sp902775565
Cow_SGB_1725	87.17	1.24	2089630	2116	9534	Bacteria	Bacillota_A	Clostridia	Saccharofermentanales	Saccharofermentanaceae	Saccharofermentans	unclassified
Cow_SGB_1726	95.75	0.53	2661761	2413	54152	Bacteria	Bacillota_A	Clostridia	Saccharofermentanales	Saccharofermentanaceae	Saccharofermentans	unclassified
Cow_SGB_1727	85.73	9.4	2551561	2599	12681	Bacteria	Bacillota_A	Clostridia	Saccharofermentanales	Saccharofermentanaceae	Saccharofermentans	Saccharofermentans sp017509205
Cow_SGB_1728	98.7	0	2142818	1900	190279	Bacteria	Bacillota_A	Clostridia	Saccharofermentanales	Saccharofermentanaceae	Saccharofermentans	Saccharofermentans sp902782125
Cow_SGB_1729	85.14	3.21	1933193	1878	17985	Bacteria	Bacillota_A	Clostridia	Saccharofermentanales	Saccharofermentanaceae	Saccharofermentans	Saccharofermentans sp902789515
Cow_SGB_1730	99.65	0.71	2935907	2638	54530	Bacteria	Bacillota_A	Clostridia	Saccharofermentanales	Saccharofermentanaceae	Saccharofermentans	Saccharofermentans sp017428155
Cow_SGB_1731	83.61	9.15	2715193	2497	12313	Bacteria	Bacillota_A	Clostridia	Saccharofermentanales	Saccharofermentanaceae	Saccharofermentans	unclassified
Cow_SGB_1732	99.29	0	3248062	2815	124196	Bacteria	Bacillota_A	Clostridia	Saccharofermentanales	Saccharofermentanaceae	Saccharofermentans	Saccharofermentans sp000621765
Cow_SGB_1733	94.61	3.94	2332342	2092	49559	Bacteria	Bacillota_A	Clostridia	Saccharofermentanales	Saccharofermentanaceae	Saccharofermentans	Saccharofermentans sp016292215
Cow_SGB_1734	86.26	5.65	2232915	2221	10232	Bacteria	Bacillota_A	Clostridia	Saccharofermentanales	Saccharofermentanaceae	Saccharofermentans	Saccharofermentans sp017427465
Cow_SGB_1735	99.29	0.71	3067561	2722	1690852	Bacteria	Bacillota_A	Clostridia	Saccharofermentanales	Saccharofermentanaceae	Saccharofermentans	Saccharofermentans sp003149065
Cow_SGB_1736	93	0.84	2548403	2502	21347	Bacteria	Bacillota_A	Clostridia	Saccharofermentanales	Saccharofermentanaceae	Saccharofermentans	Saccharofermentans sp902782235
Cow_SGB_1737	87.84	0.18	1921378	1790	26053	Bacteria	Bacillota_A	Clostridia	Saccharofermentanales	Saccharofermentanaceae	Saccharofermentans	Saccharofermentans sp902801755
Cow_SGB_1738	55.37	3.61	1711069	1814	4558	Bacteria	Bacillota_A	Clostridia	Saccharofermentanales	Saccharofermentanaceae	Saccharofermentans	Saccharofermentans sp902801755
Cow_SGB_1739	52.54	8.51	1871992	2101	3896	Bacteria	Bacillota_A	Clostridia	Saccharofermentanales	Saccharofermentanaceae	Saccharofermentans	unclassified
Cow_SGB_1740	84.4	1.46	2405796	2335	9909	Bacteria	Bacillota_A	Clostridia	Saccharofermentanales	Saccharofermentanaceae	Saccharofermentans	Saccharofermentans sp016292155
Cow_SGB_1741	96.1	0.71	2841085	2561	247036	Bacteria	Bacillota_A	Clostridia	Saccharofermentanales	Saccharofermentanaceae	Saccharofermentans	Saccharofermentans sp902780785
Cow_SGB_1742	89.21	3.32	2701701	2486	27963	Bacteria	Bacillota_A	Clostridia	Saccharofermentanales	Saccharofermentanaceae	Saccharofermentans	Saccharofermentans sp016292145
Cow_SGB_1743	98.23	0.71	3007624	2715	241959	Bacteria	Bacillota_A	Clostridia	Saccharofermentanales	Saccharofermentanaceae	Saccharofermentans	Saccharofermentans sp902764825
Cow_SGB_1744	98.23	0	2673997	2360	180623	Bacteria	Bacillota_A	Clostridia	Saccharofermentanales	Saccharofermentanaceae	Saccharofermentans	Saccharofermentans sp900107185
Cow_SGB_1745	74.71	3.6	4338023	6231	4705	Bacteria	Bacillota_A	Clostridia	Saccharofermentanales	Saccharofermentanaceae	Saccharofermentans	unclassified
Cow_SGB_1746	98.94	1.42	2595951	2333	80617	Bacteria	Bacillota_A	Clostridia	Saccharofermentanales	Saccharofermentanaceae	Saccharofermentans	Saccharofermentans sp015069205
Cow_SGB_1747	80.1	7.79	2313336	2140	44812	Bacteria	Bacillota_A	Clostridia	Saccharofermentanales	Saccharofermentanaceae	Saccharofermentans	Saccharofermentans sp015069205
Cow_SGB_1748	52.35	0.61	1201599	1303	4140	Bacteria	Bacillota_A	Clostridia	Saccharofermentanales	Saccharofermentanaceae	Saccharofermentans	Saccharofermentans sp015069205
Cow_SGB_1749	91.25	4.74	2841055	2901	9042	Bacteria	Bacillota_A	Clostridia	Saccharofermentanales	Saccharofermentanaceae	Saccharofermentans	unclassified
Cow_SGB_1750	82.84	1.65	2520016	2385	17112	Bacteria	Bacillota_A	Clostridia	Saccharofermentanales	Saccharofermentanaceae	Saccharofermentans	unclassified
Cow_SGB_1751	97.95	0.71	2568790	2301	85537	Bacteria	Bacillota_A	Clostridia	Saccharofermentanales	Saccharofermentanaceae	Saccharofermentans	Saccharofermentans sp902788505
Cow_SGB_1752	99.78	2.84	3000840	2681	115199	Bacteria	Bacillota_A	Clostridia	Saccharofermentanales	Saccharofermentanaceae	Saccharofermentans	Saccharofermentans sp016288885
Cow_SGB_1753	94.55	2.84	2599909	2461	19243	Bacteria	Bacillota_A	Clostridia	Saccharofermentanales	Saccharofermentanaceae	Saccharofermentans	Saccharofermentans sp902776845
Cow_SGB_1754	81.41	0	1642407	1626	6197	Bacteria	Bacillota_A	Clostridia	Saccharofermentanales	Saccharofermentanaceae	Saccharofermentans	Saccharofermentans sp017529925
Cow_SGB_1755	87.51	1.42	1732296	1693	7826	Bacteria	Bacillota_A	Clostridia	Saccharofermentanales	Saccharofermentanaceae	Saccharofermentans	Saccharofermentans sp900313405
Cow_SGB_1756	98.56	0	2390373	2139	213725	Bacteria	Bacillota_A	Clostridia	Saccharofermentanales	Saccharofermentanaceae	Saccharofermentans	Saccharofermentans sp900314745
Cow_SGB_1757	88.55	5.2	2219188	2216	13451	Bacteria	Bacillota_A	Clostridia	Saccharofermentanales	Saccharofermentanaceae	Saccharofermentans	Saccharofermentans sp902791885
Cow_SGB_1758	94.9	7.45	2681828	2536	79819	Bacteria	Bacillota_A	Clostridia	Saccharofermentanales	Saccharofermentanaceae	Saccharofermentans	Saccharofermentans sp017552455
Cow_SGB_1759	92	2.62	2539566	2434	36284	Bacteria	Bacillota_A	Clostridia	Saccharofermentanales	Saccharofermentanaceae	Saccharofermentans	Saccharofermentans sp017940895
Cow_SGB_1760	98.55	1.2	2426746	2217	64700	Bacteria	Bacillota_A	Clostridia	Saccharofermentanales	Saccharofermentanaceae	Saccharofermentans	unclassified
Cow_SGB_1761	90.17	0.89	2065630	1981	15186	Bacteria	Bacillota_A	Clostridia	Saccharofermentanales	Saccharofermentanaceae	Saccharofermentans	Saccharofermentans sp017451265
Cow_SGB_1762	91.1	3.9	1980576	1920	10859	Bacteria	Bacillota_A	Clostridia	Saccharofermentanales	Saccharofermentanaceae	Saccharofermentans	Saccharofermentans sp017527865
Cow_SGB_1763	86.47	3.78	1891814	1918	7970	Bacteria	Bacillota_A	Clostridia	Saccharofermentanales	Saccharofermentanaceae	Saccharofermentans	Saccharofermentans sp902767145
Cow_SGB_1764	98.56	0	2915584	2605	438934	Bacteria	Bacillota_A	Clostridia	Saccharofermentanales	Saccharofermentanaceae	Saccharofermentans	Saccharofermentans sp900111435
Cow_SGB_1765	98.56	0	3083950	2864	3083950	Bacteria	Bacillota_A	Clostridia	Saccharofermentanales	Saccharofermentanaceae	Saccharofermentans	Saccharofermentans sp900176545
Cow_SGB_1766	87.04	1.77	1683971	1717	6182	Bacteria	Bacillota_A	Clostridia	Saccharofermentanales	Saccharofermentanaceae	Saccharofermentans	Saccharofermentans sp902782985
Cow_SGB_1767	97.16	0	3010384	2667	134316	Bacteria	Bacillota_A	Clostridia	Saccharofermentanales	Saccharofermentanaceae	Saccharofermentans	Saccharofermentans sp900099715
Cow_SGB_1768	80.15	1.44	1858508	1864	5806	Bacteria	Bacillota_A	Clostridia	Saccharofermentanales	Saccharofermentanaceae	Saccharofermentans	Saccharofermentans sp902795955
Cow_SGB_1769	82.8	2.5	2112794	2051	9060	Bacteria	Bacillota_A	Clostridia	Saccharofermentanales	Saccharofermentanaceae	Saccharofermentans	unclassified
Cow_SGB_1770	92.11	1.65	2775734	2644	16860	Bacteria	Bacillota_A	Clostridia	Saccharofermentanales	Saccharofermentanaceae	Saccharofermentans	unclassified
Cow_SGB_1771	86.83	2.48	2792986	2802	6711	Bacteria	Bacillota_A	Clostridia	Saccharofermentanales	Saccharofermentanaceae	Saccharofermentans	Saccharofermentans sp902803365
Cow_SGB_1772	83.93	3.49	2774773	2861	7822	Bacteria	Bacillota_A	Clostridia	Saccharofermentanales	Saccharofermentanaceae	Saccharofermentans	Saccharofermentans sp902803695
Cow_SGB_1773	84.53	2.72	1374628	1475	7868	Bacteria	Bacillota_A	Tb-RUG-66	Tb-RUG-66	Tb-RUG-66	Tb-RUG-66	Tb-RUG-66 sp016288255
Cow_SGB_1774	85.13	0	1844219	1827	47795	Bacteria	Bacillota_A	Clostridia	Lachnospirales	Lachnospiraceae	Choladocola	Choladocola sp003480725
Cow_SGB_1775	91.68	2.45	2169202	2015	23441	Bacteria	Bacillota_A	Clostridia	Lachnospirales	Lachnospiraceae	UBA3766	UBA3766 sp016285575
Cow_SGB_1776	92.14	3.44	2537635	2407	26361	Bacteria	Bacillota_A	Clostridia	Lachnospirales	Lachnospiraceae	UBA3766	UBA3766 sp016284175
Cow_SGB_1777	86.47	2.21	2342118	2220	15911	Bacteria	Bacillota_A	Clostridia	Lachnospirales	Lachnospiraceae	UBA3766	unclassified
Cow_SGB_1778	95.2	0.64	2592391	2377	185892	Bacteria	Bacillota_A	Clostridia	Lachnospirales	Lachnospiraceae	UBA3766	UBA3766 sp900100245
Cow_SGB_1779	88.51	1.64	2145061	2119	15588	Bacteria	Bacillota_A	Clostridia	Lachnospirales	Lachnospiraceae	UBA3766	UBA3766 sp902765365
Cow_SGB_1780	80.89	2.05	2234724	2176	16524	Bacteria	Bacillota_A	Clostridia	Lachnospirales	Lachnospiraceae	UBA3766	UBA3766 sp902790275
Cow_SGB_1781	83.46	2	2222644	2196	10332	Bacteria	Bacillota_A	Clostridia	Lachnospirales	Lachnospiraceae	UBA3766	UBA3766 sp902782715
Cow_SGB_1782	84.21	0.11	1899092	1845	7026	Bacteria	Bacillota_A	Clostridia	Lachnospirales	Lachnospiraceae	UBA3766	UBA3766 sp902803015
Cow_SGB_1783	95.15	0.9	2712439	2188	39982	Bacteria	Bacillota_A	Clostridia	Lachnospirales	Lachnospiraceae	UBA3766	unclassified
Cow_SGB_1784	89.35	1.2	2629635	2367	16827	Bacteria	Bacillota_A	Clostridia	Lachnospirales	Lachnospiraceae	UBA3766	UBA3766 sp902789265
Cow_SGB_1785	95.48	0.74	2899831	2334	44721	Bacteria	Bacillota_A	Clostridia	Lachnospirales	Lachnospiraceae	UBA3766	unclassified
Cow_SGB_1786	94.03	0.27	2775276	2317	59103	Bacteria	Bacillota_A	Clostridia	Lachnospirales	Lachnospiraceae	UBA3766	UBA3766 sp900313265
Cow_SGB_1787	86.02	4.11	2430948	2151	10843	Bacteria	Bacillota_A	Clostridia	Lachnospirales	Lachnospiraceae	UBA3766	UBA3766 sp902783455
Cow_SGB_1788	93.42	1.22	3283487	2533	84833	Bacteria	Bacillota_A	Clostridia	Lachnospirales	Lachnospiraceae	UBA3766	unclassified
Cow_SGB_1789	99.33	0	2378085	2043	231957	Bacteria	Bacillota_A	Clostridia	Lachnospirales	Lachnospiraceae	Wujia	Wujia sp902780405
Cow_SGB_1790	91.64	0.56	2112026	1822	18934	Bacteria	Bacillota_A	Clostridia	Lachnospirales	Lachnospiraceae	UBA3775	unclassified
Cow_SGB_1791	98.32	0.34	2686267	2282	166634	Bacteria	Bacillota_A	Clostridia	Lachnospirales	Lachnospiraceae	Eubacterium_Q	Eubacterium_Q sp000687655
Cow_SGB_1792	87.88	1.68	2962047	2682	8844	Bacteria	Bacillota_A	Clostridia	Lachnospirales	Lachnospiraceae	Eubacterium_Q	Eubacterium_Q sp902772925
Cow_SGB_1793	81.5	3.34	1775223	1680	6664	Bacteria	Bacillota_A	Clostridia	Lachnospirales	Lachnospiraceae	UBA3775	UBA3775 sp902772565
Cow_SGB_1794	90.39	3.58	2130703	2225	4900	Bacteria	Bacillota_A	Clostridia	Oscillospirales	Acutalibacteraceae	RGIG2945	unclassified
Cow_SGB_1795	89.15	2.65	1847603	1797	6652	Bacteria	Bacillota	Bacilli	Erysipelotrichales	Erysipelotrichaceae	Longicatena	unclassified
Cow_SGB_1796	86.79	1.26	1887587	1787	13666	Bacteria	Bacillota	Bacilli	Erysipelotrichales	Erysipelotrichaceae	Longicatena	unclassified
Cow_SGB_1797	72.24	2.55	2514458	2598	3525	Bacteria	Bacteroidota	Bacteroidia	Bacteroidales	UBA3824	UBA3824	UBA3824 sp017541145
Cow_SGB_1798	97.78	3.33	3161347	3287	48096	Bacteria	Bacillota	Bacilli	Staphylococcales	Staphylococcaceae	Staphylococcus	Staphylococcus equorum
Cow_SGB_1799	100	0.69	3060291	2787	3060291	Bacteria	Bacillota_A	Clostridia	Clostridiales	Clostridiaceae	Clostridium_L	Clostridium_L algidicarnis
Cow_SGB_1800	96.48	0.06	2874418	2650	46889	Bacteria	Bacillota_A	Clostridia	Lachnospirales	Lachnospiraceae	RUG11200	RUG11200 sp902766825
Cow_SGB_1801	91.92	2.2	2460781	2696	14265	Bacteria	Bacillota_A	Clostridia	Lachnospirales	Lachnospiraceae	Clostridium_AP	Clostridium_AP scindens
Cow_SGB_1802	89.75	1.78	2175287	1982	14763	Bacteria	Bacillota_A	Clostridia	Lachnospirales	Lachnospiraceae	Lachnoclostridium_B	unclassified
Cow_SGB_1803	98.57	0	2921317	2648	38874	Bacteria	Bacillota_A	Clostridia	Lachnospirales	Lachnospiraceae	CAG-603	CAG-603 sp902767015
Cow_SGB_1804	93.64	0	2768256	2342	9469	Bacteria	Bacillota_A	Clostridia	Lachnospirales	Lachnospiraceae	RUG14305	RUG14305 sp902797785
Cow_SGB_1805	87.59	1.97	2301689	2330	17440	Bacteria	Bacillota_A	Clostridia	Lachnospirales	Lachnospiraceae	Agathobacter	unclassified
Cow_SGB_1806	89.56	6.35	2201977	2188	34203	Bacteria	Bacillota_A	Clostridia	Lachnospirales	Lachnospiraceae	Agathobacter	unclassified
Cow_SGB_1807	81.62	2.09	2327328	2270	23384	Bacteria	Bacillota_A	Clostridia	Lachnospirales	Lachnospiraceae	Agathobacter	unclassified
Cow_SGB_1808	88.34	1.59	2582846	2487	73905	Bacteria	Bacillota_A	Clostridia	Lachnospirales	Lachnospiraceae	Agathobacter	unclassified
Cow_SGB_1809	90.27	3.49	2633565	2508	51000	Bacteria	Bacillota_A	Clostridia	Lachnospirales	Lachnospiraceae	Agathobacter	unclassified
Cow_SGB_1810	88.91	2.95	2516942	2500	30384	Bacteria	Bacillota_A	Clostridia	Lachnospirales	Lachnospiraceae	Agathobacter	unclassified
Cow_SGB_1811	72.92	4.39	2503817	2607	15083	Bacteria	Bacillota_A	Clostridia	Lachnospirales	Lachnospiraceae	Agathobacter	unclassified
Cow_SGB_1812	89.42	4.39	2624913	2408	46274	Bacteria	Bacillota_A	Clostridia	Lachnospirales	Lachnospiraceae	Agathobacter	unclassified
Cow_SGB_1813	65.28	1.72	1005464	1132	4342	Bacteria	Bacillota_A	Clostridia	Peptostreptococcales	Anaerovoracaceae	Gallibacter	unclassified
Cow_SGB_1814	87.94	3.39	1845449	1824	15536	Bacteria	Bacillota_A	Clostridia	Lachnospirales	Lachnospiraceae	Faecalimonas	unclassified
Cow_SGB_1815	91.22	5.37	1554792	1655	12165	Bacteria	Bacillota_A	Clostridia	Lachnospirales	Lachnospiraceae	Faecalimonas	unclassified
Cow_SGB_1816	72.37	4.42	1518961	1658	5182	Bacteria	Bacillota_A	Clostridia	Lachnospirales	Lachnospiraceae	Faecalimonas	unclassified
Cow_SGB_1817	94.62	0.16	2135676	2002	37610	Bacteria	Bacillota_A	Clostridia	Lachnospirales	Lachnospiraceae	Faecalimonas	Faecalimonas sp900316755
Cow_SGB_1818	88.57	4.11	1752500	1800	15001	Bacteria	Bacillota_A	Clostridia	Lachnospirales	Lachnospiraceae	Faecalimonas	unclassified
Cow_SGB_1819	88.09	4.42	1902180	2075	7517	Bacteria	Bacillota_A	Clostridia	Lachnospirales	Lachnospiraceae	Faecalimonas	unclassified
Cow_SGB_1820	93.87	3.32	1800676	1865	27172	Bacteria	Bacillota_A	Clostridia	Lachnospirales	Lachnospiraceae	Faecalimonas	unclassified
Cow_SGB_1821	94.37	3.15	1961785	1985	30902	Bacteria	Bacillota_A	Clostridia	Lachnospirales	Lachnospiraceae	Faecalimonas	unclassified
Cow_SGB_1822	78.09	3.32	1892157	2467	4762	Bacteria	Bacillota_A	Clostridia	Lachnospirales	Lachnospiraceae	Faecalimonas	unclassified
Cow_SGB_1823	78.02	5.56	1475883	1695	5372	Bacteria	Bacillota_A	Clostridia	Lachnospirales	Lachnospiraceae	Faecalimonas	unclassified
Cow_SGB_1824	89.21	2.22	1610008	1719	11581	Bacteria	Bacillota_A	Clostridia	Lachnospirales	Lachnospiraceae	Faecalimonas	unclassified
Cow_SGB_1825	83.64	1.58	1497001	1595	10079	Bacteria	Bacillota_A	Clostridia	Lachnospirales	Lachnospiraceae	Faecalimonas	unclassified
Cow_SGB_1826	50.32	7.02	1394061	1555	7366	Bacteria	Bacillota_A	Clostridia	Lachnospirales	Lachnospiraceae	CAKRJP01	unclassified
Cow_SGB_1827	90.35	1.46	2070815	2033	21530	Bacteria	Bacillota_A	Clostridia	Lachnospirales	Lachnospiraceae	JAFBIY01	unclassified
Cow_SGB_1828	97.47	0.21	2297042	2136	36185	Bacteria	Bacillota_A	Clostridia	Lachnospirales	Lachnospiraceae	Faecalimonas	Faecalimonas phoceensis
Cow_SGB_1829	52.75	5.42	1064366	1226	3519	Bacteria	Bacillota_A	Clostridia	Lachnospirales	Lachnospiraceae	Faecalimonas	unclassified
Cow_SGB_1830	55.71	7.49	1176536	1411	3232	Bacteria	Bacillota_A	Clostridia	Lachnospirales	Lachnospiraceae	Faecalimonas	unclassified
Cow_SGB_1831	76.87	3.44	2236333	2115	101843	Bacteria	Bacillota_A	Clostridia	Lachnospirales	Lachnospiraceae	Faecalimonas	unclassified
Cow_SGB_1832	75.49	6.9	1548242	1665	4871	Bacteria	Bacillota_A	Clostridia	Oscillospirales	Ruminococcaceae	RGIG3102	unclassified
Cow_SGB_1833	84.84	1.68	2414041	2221	24053	Bacteria	Bacillota_A	Clostridia	Lachnospirales	Lachnospiraceae	Butyribacter	Butyribacter sp902788645
Cow_SGB_1834	87.25	2.73	1721816	1613	11932	Bacteria	Bacillota_A	Clostridia	Oscillospirales	Acutalibacteraceae	UMGS1279	UMGS1279 sp900550315
Cow_SGB_1835	80.79	1.58	2360761	2274	5154	Bacteria	Bacillota_A	Clostridia	Lachnospirales	Lachnospiraceae	TWA4	unclassified
Cow_SGB_1836	65.24	1.66	1790574	1945	3001	Bacteria	Bacillota_A	Clostridia	Lachnospirales	Lachnospiraceae	TWA4	unclassified
Cow_SGB_1837	86.2	1.34	2377287	2186	7811	Bacteria	Bacillota_A	Clostridia	Lachnospirales	Lachnospiraceae	Wujia	Wujia sp900321145
Cow_SGB_1838	91.03	2.71	2652123	2252	15345	Bacteria	Bacillota_A	Clostridia	Lachnospirales	Lachnospiraceae	Wujia	unclassified
Cow_SGB_1839	80.48	0.87	1543105	1649	9190	Bacteria	Bacillota_B	Dehalobacteriia	UBA7702	UBA7702	UBA7702	UBA7702 sp902766525
Cow_SGB_1840	84.76	2.65	2112913	1936	41273	Bacteria	Bacillota_B	Dehalobacteriia	UBA7702	UBA7702	UBA7702	UBA7702 sp902796855
Cow_SGB_1841	90.97	6.39	3605868	3691	6575	Bacteria	Bacillota_A	Clostridia	Lachnospirales	Lachnospiraceae	RGIG5612	unclassified
Cow_SGB_1842	87.13	8.71	2826435	2727	5886	Bacteria	Bacillota_A	Clostridia	Lachnospirales	Lachnospiraceae	RGIG5612	unclassified
Cow_SGB_1843	80.62	2.68	1891312	1979	6868	Bacteria	Bacillota_A	Clostridia	Oscillospirales	Oscillospiraceae	UBA2922	UBA2922 sp905236515
Cow_SGB_1844	89.4	0.22	1918002	1893	19001	Bacteria	Bacillota_A	Clostridia	Oscillospirales	Oscillospiraceae	UBA2922	UBA2922 sp902802565
Cow_SGB_1845	98.96	0	4084064	4161	402560	Bacteria	Bacillota	Bacilli	Bacillales	Bacillaceae	Bacillus	Bacillus licheniformis
Cow_SGB_1846	57.91	2.15	1732003	1842	2989	Bacteria	Bacillota_A	Clostridia	Lachnospirales	Lachnospiraceae	Butyribacter	unclassified
Cow_SGB_1847	92.06	0	1444839	1483	32848	Bacteria	Bacillota_A	Clostridia	Oscillospirales	Acutalibacteraceae	RGIG3009	unclassified
Cow_SGB_1848	94.41	3.51	1523645	1600	16636	Bacteria	Bacillota_A	Clostridia	Oscillospirales	Acutalibacteraceae	RGIG3009	unclassified
Cow_SGB_1849	93.98	5.41	1388046	1448	11592	Bacteria	Bacillota_A	Clostridia	Oscillospirales	Acutalibacteraceae	RGIG3009	unclassified
Cow_SGB_1850	96.68	0	2768771	2568	48622	Bacteria	Bacillota_A	Clostridia	Lachnospirales	Lachnospiraceae	Oribacterium	Oribacterium sp900315665
Cow_SGB_1851	91.17	0.11	2556525	2166	18718	Bacteria	Bacillota_A	Clostridia	Lachnospirales	Lachnospiraceae	Bilifractor	Bilifractor sp900314295
Cow_SGB_1852	97.13	0.21	2326380	1938	57416	Bacteria	Bacillota_A	Clostridia	Lachnospirales	Lachnospiraceae	Bilifractor	Bilifractor sp900318405
Cow_SGB_1853	96.5	0.74	2178036	1829	62342	Bacteria	Bacillota_A	Clostridia	Lachnospirales	Lachnospiraceae	Bilifractor	Bilifractor sp900319355
Cow_SGB_1854	95.31	0.65	1992024	1835	10828	Bacteria	Bacillota_A	Clostridia	Lachnospirales	Lachnospiraceae	Oribacterium	Oribacterium sp004554245
Cow_SGB_1855	83.39	1.27	1807421	1743	8333	Bacteria	Bacillota_A	Clostridia	Lachnospirales	Lachnospiraceae	Oribacterium	Oribacterium sp002449915
Cow_SGB_1856	75.78	1.82	5901917	6595	5130	Bacteria	Actinomycetota	Actinomycetia	Mycobacteriales	Mycobacteriaceae	Rhodococcus	Rhodococcus qingshengii
Cow_SGB_1857	95.77	0.5	2214598	1996	110026	Bacteria	Bacillota_A	Clostridia	Lachnospirales	Lachnospiraceae	RUG191	RUG191 sp900316395
Cow_SGB_1858	96.86	0	2376381	2083	104861	Bacteria	Bacillota_A	Clostridia	Lachnospirales	Lachnospiraceae	RUG191	RUG191 sp900315945
Cow_SGB_1859	71.01	3.04	1760576	1821	5778	Bacteria	Bacillota_A	Clostridia	Lachnospirales	Lachnospiraceae	RUG191	RUG191 sp900315945
Cow_SGB_1860	88.14	1.97	1919902	1926	7933	Bacteria	Bacillota_A	Clostridia	Lachnospirales	Lachnospiraceae	RUG191	unclassified
Cow_SGB_1861	89.14	1.05	2342898	2199	24999	Bacteria	Bacillota_A	Clostridia	Lachnospirales	Lachnospiraceae	UBA7050	unclassified
Cow_SGB_1862	96.64	0.67	2836001	2697	48632	Bacteria	Bacillota_A	Clostridia	Lachnospirales	Lachnospiraceae	Eubacterium_F	Eubacterium_F sp003491505
Cow_SGB_1863	66.67	0	2251214	2079	37845	Bacteria	Bacillota_A	Clostridia	Lachnospirales	Bianqueaceae	CALWPV01	unclassified
Cow_SGB_1864	94.65	8.56	3027739	3011	20642	Bacteria	Bacillota_A	Clostridia	Lachnospirales	Bianqueaceae	CALWPV01	unclassified
Cow_SGB_1865	80.88	5.84	2080436	1962	15483	Bacteria	Bacillota_A	Clostridia	Oscillospirales	Oscillospiraceae	Faecousia	unclassified
Cow_SGB_1866	82.06	9.31	1799582	1730	6223	Bacteria	Bacillota_A	Clostridia	Lachnospirales	Lachnospiraceae	UBA1066	unclassified
Cow_SGB_1867	82.72	4.61	1823824	1864	5116	Bacteria	Bacillota_A	Clostridia	Lachnospirales	Lachnospiraceae	UBA1066	UBA1066 sp902783935
Cow_SGB_1868	86.87	4.24	2383106	2304	6399	Bacteria	Bacillota_A	Clostridia	Lachnospirales	Lachnospiraceae	Porcincola	Porcincola sp902803065
Cow_SGB_1869	73.38	0.84	2218640	1998	7162	Bacteria	Bacillota_A	Clostridia	Lachnospirales	Lachnospiraceae	RGIG5021	unclassified
Cow_SGB_1870	92.52	2.22	2638999	2272	16645	Bacteria	Bacillota_A	Clostridia	Lachnospirales	Lachnospiraceae	Porcincola	Porcincola sp902767335
Cow_SGB_1871	83.82	4.1	1917880	2174	4769	Bacteria	Bacillota_A	Clostridia	Lachnospirales	Lachnospiraceae	Eubacterium_I	Eubacterium_I sp015057865
Cow_SGB_1872	90.07	2.99	2164797	2224	8251	Bacteria	Bacillota_A	Clostridia	Lachnospirales	Lachnospiraceae	Eubacterium_I	Eubacterium_I sp902797015
Cow_SGB_1873	85.69	4.07	2013907	2276	4582	Bacteria	Bacillota_A	Clostridia	Lachnospirales	Lachnospiraceae	Copromonas	unclassified
Cow_SGB_1874	94.94	3.49	2247166	2168	18135	Bacteria	Bacillota_A	Clostridia	Lachnospirales	Lachnospiraceae	Copromonas	Copromonas sp017380975
Cow_SGB_1875	60.32	1.75	2189362	2338	6360	Bacteria	Bacillota_A	Clostridia	Lachnospirales	Lachnospiraceae	Copromonas	unclassified
Cow_SGB_1876	97.29	0	2178034	1794	26658	Bacteria	Bacteroidota	Bacteroidia	Bacteroidales	WCHB1-69	unclassified	unclassified
Cow_SGB_1877	85.28	0.97	1679267	1621	7975	Bacteria	Bacillota_A	Clostridia	Lachnospirales	Lachnospiraceae	RUG11204	RUG11204 sp902766845
Cow_SGB_1878	83.11	0.17	2001170	1622	111678	Bacteria	UBA3054	UBA3054	UBA3054	UBA3054	UBA3054	UBA3054 sp002366995
Cow_SGB_1879	90.05	5.68	3298657	2818	38331	Bacteria	Bacillota_A	Clostridia	Lachnospirales	Lachnospiraceae	RUG11977	RUG11977 sp016288005
Cow_SGB_1880	93.67	4.18	3433696	3018	47761	Bacteria	Bacillota_A	Clostridia	Lachnospirales	Lachnospiraceae	SZUA-448	SZUA-448 sp016280395
Cow_SGB_1881	94.91	1.45	2982212	2686	24139	Bacteria	Bacillota_A	Clostridia	Lachnospirales	Lachnospiraceae	RGIG3528	RGIG3528 sp016283775
Cow_SGB_1882	98.65	0	3418360	2728	220593	Bacteria	Bacillota_A	Clostridia	Lachnospirales	Lachnospiraceae	V9D3004	V9D3004 sp000621985
Cow_SGB_1883	99.37	0	4732373	4300	213027	Bacteria	Bacillota_A	Clostridia	Lachnospirales	Lachnospiraceae	Lacrimispora	Lacrimispora aerotolerans
Cow_SGB_1884	94.11	0	1988362	1842	54737	Bacteria	Bacillota_A	Clostridia	Lachnospirales	Lachnospiraceae	FD2005	FD2005 sp017392525
Cow_SGB_1885	99.52	0	2555436	2294	2070390	Bacteria	Bacillota_A	Clostridia	Lachnospirales	Lachnospiraceae	FD2005	FD2005 sp000702525
Cow_SGB_1886	94.75	4.88	3784327	3217	47435	Bacteria	Bacillota_A	Clostridia	Lachnospirales	Lachnospiraceae	SIG293	SIG293 sp016282745
Cow_SGB_1887	89.43	1.45	1769436	1644	30898	Bacteria	Bacillota_A	Clostridia	Lachnospirales	Lachnospiraceae	Agathobacter	unclassified
Cow_SGB_1888	96.38	0	2240044	1923	67653	Bacteria	Bacillota_A	Clostridia	Lachnospirales	Lachnospiraceae	UBA629	UBA629 sp900317915
Cow_SGB_1889	95.41	0	1916849	1686	86339	Bacteria	Bacillota_A	Clostridia	Lachnospirales	Lachnospiraceae	UBA629	UBA629 sp900316625
Cow_SGB_1890	93.61	0	2233581	2023	162130	Bacteria	Bacillota_A	Clostridia	Lachnospirales	Lachnospiraceae	RUG306	RUG306 sp900317755
Cow_SGB_1891	97.77	0.48	2481137	2232	326650	Bacteria	Bacillota_A	Clostridia	Lachnospirales	Lachnospiraceae	XBD2001	XBD2001 sp900116395
Cow_SGB_1892	78.29	0	2019566	1832	14970	Bacteria	Bacillota_A	Clostridia	Lachnospirales	Lachnospiraceae	Lachnospira	unclassified
Cow_SGB_1893	100	0	3373099	2863	179803	Bacteria	Bacillota_A	Clostridia	Lachnospirales	Lachnospiraceae	NC2004	NC2004 sp000621905
Cow_SGB_1894	62.97	2.15	1068693	1061	6356	Bacteria	Bacillota_A	Clostridia	Oscillospirales	Acutalibacteraceae	UBA737	UBA737 sp017423885
Cow_SGB_1895	94.85	4.65	2871542	2972	9089	Bacteria	Bacillota_A	Clostridia	Lachnospirales	Lachnospiraceae	RGIG1668	RGIG1668 sp017390645
Cow_SGB_1896	56.14	8.77	1999997	2009	11446	Bacteria	Bacillota_A	Clostridia	Lachnospirales	Lachnospiraceae	RUG11237	RUG11237 sp017408735
Cow_SGB_1897	65.72	4.07	2002298	1967	12450	Bacteria	Bacillota_A	Clostridia	Lachnospirales	Lachnospiraceae	COE1	unclassified
Cow_SGB_1898	50.35	5.26	3262763	4171	2821	Bacteria	Bacillota_A	Clostridia	Lachnospirales	Lachnospiraceae	RGIG3040	unclassified
Cow_SGB_1899	97.42	0.72	3571103	3299	59934	Bacteria	Bacillota_A	Clostridia	Lachnospirales	Lachnospiraceae	Roseburia	unclassified
Cow_SGB_1900	56.44	3.8	2159915	2460	5684	Bacteria	Bacillota_A	Clostridia	Lachnospirales	Lachnospiraceae	Butyrivibrio_A	unclassified
Cow_SGB_1901	87.84	6.77	2403493	2644	5764	Bacteria	Bacillota_A	Clostridia	Lachnospirales	Lachnospiraceae	CAG-303	CAG-303 sp017381055
Cow_SGB_1902	54.57	4.93	1749758	1918	4023	Bacteria	Bacillota_A	Clostridia	Lachnospirales	Lachnospiraceae	CAG-303	unclassified
Cow_SGB_1903	73.23	1.34	1430762	1386	9181	Bacteria	Bacillota_A	Clostridia	Lachnospirales	Lachnospiraceae	CAG-303	unclassified
Cow_SGB_1904	97.99	1.68	1732766	1758	14105	Bacteria	Bacillota_A	Clostridia	Lachnospirales	Lachnospiraceae	Butyrivibrio_A	unclassified
Cow_SGB_1905	88.68	3.68	2058021	2363	9474	Bacteria	Bacillota_A	Clostridia	Lachnospirales	Lachnospiraceae	Butyrivibrio_A	unclassified
Cow_SGB_1906	97.65	0.67	2194939	2124	59399	Bacteria	Bacillota_A	Clostridia	Lachnospirales	Lachnospiraceae	Butyrivibrio_A	unclassified
Cow_SGB_1907	88.46	3.05	2121429	2261	8316	Bacteria	Bacillota_A	Clostridia	Lachnospirales	Lachnospiraceae	Butyrivibrio_A	unclassified
Cow_SGB_1908	96.9	0.56	3083580	2661	72769	Bacteria	Bacillota_A	Clostridia	Lachnospirales	Lachnospiraceae	V9D3004	unclassified
Cow_SGB_1909	93.49	2.24	2726712	2527	11463	Bacteria	Bacillota_A	Clostridia	Lachnospirales	Lachnospiraceae	CAG-603	CAG-603 sp902773095
Cow_SGB_1910	98.99	0.67	3121522	2892	70620	Bacteria	Bacillota_A	Clostridia	Lachnospirales	Lachnospiraceae	CAG-603	CAG-603 sp902786365
Cow_SGB_1911	99.33	1.34	2357739	2238	68859	Bacteria	Bacillota_A	Clostridia	Lachnospirales	Lachnospiraceae	CAG-603	CAG-603 sp900314525
Cow_SGB_1912	96.64	0	2673078	2397	64644	Bacteria	Bacillota_A	Clostridia	Lachnospirales	Lachnospiraceae	CAG-603	CAG-603 sp900321855
Cow_SGB_1913	83.03	8.68	3055490	3284	4713	Bacteria	Bacillota_A	Clostridia	Lachnospirales	Lachnospiraceae	CAG-603	unclassified
Cow_SGB_1914	99.33	0	2589752	2335	49777	Bacteria	Bacillota_A	Clostridia	Lachnospirales	Lachnospiraceae	UBA2821	UBA2821 sp002351535
Cow_SGB_1915	75.94	2.52	1998519	2130	4333	Bacteria	Bacillota_A	Clostridia	Lachnospirales	Lachnospiraceae	Butyribacter	unclassified
Cow_SGB_1916	98.66	0	2502334	2385	38048	Bacteria	Bacillota_A	Clostridia	Lachnospirales	Lachnospiraceae	UBA2821	UBA2821 sp902763335
Cow_SGB_1917	94.54	0.89	2834004	2649	14291	Bacteria	Bacillota_A	Clostridia	Lachnospirales	Lachnospiraceae	Butyribacter	Butyribacter sp000436755
Cow_SGB_1918	85.27	2.24	1849070	1975	6263	Bacteria	Bacillota_A	Clostridia	Lachnospirales	Lachnospiraceae	CAG-632	CAG-632 sp900539185
Cow_SGB_1919	98.1	0.06	2588659	2401	15723	Bacteria	Bacillota_A	Clostridia	Lachnospirales	Lachnospiraceae	CAG-632	CAG-632 sp902783585
Cow_SGB_1920	97.32	0	2052273	1876	112906	Bacteria	Bacillota_A	Clostridia	Lachnospirales	Lachnospiraceae	CAG-603	CAG-603 sp900315425
Cow_SGB_1921	56.02	5.86	2564933	3353	2959	Bacteria	Bacillota_A	Clostridia	Lachnospirales	Lachnospiraceae	CAG-603	CAG-603 sp900315425
Cow_SGB_1922	99.08	0	2657126	2409	40527	Bacteria	Bacillota_A	Clostridia	Lachnospirales	Lachnospiraceae	CAG-603	CAG-603 sp900314555
Cow_SGB_1923	95.62	0	1893272	1686	28755	Bacteria	Bacillota_A	Clostridia	Lachnospirales	Lachnospiraceae	CAG-603	CAG-603 sp900110975
Cow_SGB_1924	99.03	0.48	2844513	2529	52105	Bacteria	Bacillota_A	Clostridia	Lachnospirales	Lachnospiraceae	Lachnobacterium	Lachnobacterium sp900113385
Cow_SGB_1925	99.52	0	2607647	2378	172663	Bacteria	Bacillota_A	Clostridia	Lachnospirales	Lachnospiraceae	Lachnobacterium	Lachnobacterium bovis_A
Cow_SGB_1926	99.52	0.16	2717066	2412	100117	Bacteria	Bacillota_A	Clostridia	Lachnospirales	Lachnospiraceae	Lachnobacterium	Lachnobacterium bovis
Cow_SGB_1927	97.26	0.47	2863638	2636	32547	Bacteria	Bacillota_A	Clostridia	Lachnospirales	Lachnospiraceae	RUG11237	RUG11237 sp902767135
Cow_SGB_1928	99.58	0	3871453	3326	79559	Bacteria	Bacillota_A	Clostridia	Lachnospirales	Lachnospiraceae	Butyrivibrio	Butyrivibrio sp000424545
Cow_SGB_1929	99.42	0	3509498	3449	101285	Bacteria	Bacillota_A	Clostridia	Lachnospirales	Lachnospiraceae	Dorea	Dorea formicigenerans
Cow_SGB_1930	99.42	0	3595079	3530	59489	Bacteria	Bacillota_A	Clostridia	Lachnospirales	Lachnospiraceae	Dorea_A	Dorea_A longicatena_B
Cow_SGB_1931	94.13	0.9	2983892	2954	23519	Bacteria	Bacillota_A	Clostridia	Lachnospirales	Lachnospiraceae	Dorea_A	Dorea_A longicatena
Cow_SGB_1932	98.83	0	3724077	3762	2261011	Bacteria	Bacillota_A	Clostridia	Lachnospirales	Lachnospiraceae	Ruminococcus_B	Ruminococcus_B gnavus
Cow_SGB_1933	91.23	1.17	2281460	2175	40851	Bacteria	Bacillota_A	Clostridia	Lachnospirales	Lachnospiraceae	Mediterraneibacter	Mediterraneibacter faecis
Cow_SGB_1934	99.37	0.32	3698401	3396	100193	Bacteria	Bacillota_A	Clostridia	Lachnospirales	Lachnospiraceae	Blautia_A	Blautia_A massiliensis
Cow_SGB_1935	99.37	0	3583102	3295	40290	Bacteria	Bacillota_A	Clostridia	Lachnospirales	Lachnospiraceae	Blautia_A	Blautia_A wexlerae
Cow_SGB_1936	88.35	4.49	2737000	2516	16040	Bacteria	Bacillota_A	Clostridia	Lachnospirales	Lachnospiraceae	Blautia_A	Blautia_A sp018919065
Cow_SGB_1937	99.36	0	3477297	3436	71036	Bacteria	Bacillota_A	Clostridia	Lachnospirales	Lachnospiraceae	Blautia	Blautia sp900556555
Cow_SGB_1938	98.73	0.85	2810403	2724	46076	Bacteria	Bacillota_A	Clostridia	Lachnospirales	Lachnospiraceae	Blautia	Blautia sp900555025
Cow_SGB_1939	87.28	2.89	1855136	1879	12083	Bacteria	Bacillota_A	Clostridia	Lachnospirales	Lachnospiraceae	HGM12587	unclassified
Cow_SGB_1940	86.9	0.84	1932088	1943	16054	Bacteria	Bacillota_A	Clostridia	Lachnospirales	Lachnospiraceae	HGM12587	HGM12587 sp017622875
Cow_SGB_1941	89.18	2.11	1639661	1862	7074	Bacteria	Bacillota_A	Clostridia	Lachnospirales	Lachnospiraceae	HGM12587	unclassified
Cow_SGB_1942	61.52	3.51	819905	890	5811	Bacteria	Bacillota_A	Clostridia	Lachnospirales	Lachnospiraceae	HGM12587	unclassified
Cow_SGB_1943	81.89	5.77	2326748	2328	5611	Bacteria	Bacillota_A	Clostridia	Lachnospirales	Lachnospiraceae	HGM12587	unclassified
Cow_SGB_1944	63.48	8.77	2773160	2545	18468	Bacteria	Bacillota_A	Clostridia	Lachnospirales	Lachnospiraceae	unclassified	unclassified
Cow_SGB_1945	98.66	0	3374801	3013	60182	Bacteria	Bacillota_A	Clostridia	Lachnospirales	Lachnospiraceae	CAG-411	CAG-411 sp902786205
Cow_SGB_1946	98.66	0	3162335	2684	41943	Bacteria	Bacillota_A	Clostridia	Lachnospirales	Lachnospiraceae	CAG-411	CAG-411 sp017393285
Cow_SGB_1947	97.99	0.67	3423772	2981	41802	Bacteria	Bacillota_A	Clostridia	Lachnospirales	Lachnospiraceae	CAG-411	CAG-411 sp902795895
Cow_SGB_1948	93.28	1.84	2721984	2594	181590	Bacteria	Bacillota_A	Clostridia	Lachnospirales	Lachnospiraceae	XBB1006	XBB1006 sp900115795
Cow_SGB_1949	87.89	5.85	2868134	3004	6294	Bacteria	Bacillota_A	Clostridia	Lachnospirales	Lachnospiraceae	Anaerosporobacter	unclassified
Cow_SGB_1950	84.11	5.54	2511376	2552	6469	Bacteria	Bacillota_A	Clostridia	Lachnospirales	Lachnospiraceae	Anaerobutyricum	Anaerobutyricum sp902767195
Cow_SGB_1951	88.06	1.41	2854537	2806	7472	Bacteria	Bacillota_A	Clostridia	Lachnospirales	Lachnospiraceae	Anaerobutyricum	Anaerobutyricum sp902795715
Cow_SGB_1952	84.24	6.06	2352747	2420	5941	Bacteria	Bacillota_A	Clostridia	Lachnospirales	Lachnospiraceae	Anaerobutyricum	Anaerobutyricum sp902782815
Cow_SGB_1953	86.11	1.34	1981820	1975	8502	Bacteria	Bacillota_A	Clostridia	Lachnospirales	Lachnospiraceae	Anaerobutyricum	unclassified
Cow_SGB_1954	82.93	3.84	2843608	2918	5067	Bacteria	Bacillota_A	Clostridia	Lachnospirales	Lachnospiraceae	Anaerobutyricum	Anaerobutyricum sp902782625
Cow_SGB_1955	80.37	3.41	2230454	2305	5954	Bacteria	Bacillota_A	Clostridia	Lachnospirales	Lachnospiraceae	Anaerobutyricum	Anaerobutyricum sp902783205
Cow_SGB_1956	88.69	3.48	2635822	2455	44831	Bacteria	Bacillota_A	Clostridia	Lachnospirales	Lachnospiraceae	Porcincola	Porcincola sp902799015
Cow_SGB_1957	92.48	2.49	2392143	2026	75917	Bacteria	Bacillota_A	Clostridia	Lachnospirales	Lachnospiraceae	Porcincola	Porcincola sp902781455
Cow_SGB_1958	80.85	4.85	2203536	2216	8450	Bacteria	Bacillota_A	Clostridia	Lachnospirales	Lachnospiraceae	Porcincola	Porcincola sp900313765
Cow_SGB_1959	88.09	3.8	2467609	2300	12551	Bacteria	Bacillota_A	Clostridia	Lachnospirales	Lachnospiraceae	Porcincola	unclassified
Cow_SGB_1960	97.47	0.79	3076480	2715	73784	Bacteria	Bacillota_A	Clostridia	Lachnospirales	Lachnospiraceae	Porcincola	Porcincola sp902801515
Cow_SGB_1961	95.49	1.68	2502860	2134	85778	Bacteria	Bacillota_A	Clostridia	Lachnospirales	Lachnospiraceae	Porcincola	Porcincola sp002350685
Cow_SGB_1962	82.5	3.48	2373286	2314	8068	Bacteria	Bacillota_A	Clostridia	Lachnospirales	Lachnospiraceae	Porcincola	Porcincola sp902803155
Cow_SGB_1963	90.7	3.64	2312874	2151	24135	Bacteria	Bacillota_A	Clostridia	Lachnospirales	Lachnospiraceae	UBA6987	UBA6987 sp016290595
Cow_SGB_1964	86.28	0.89	2215572	1908	37835	Bacteria	Bacillota_A	Clostridia	Lachnospirales	Lachnospiraceae	UBA6987	unclassified
Cow_SGB_1965	90.12	1.45	1865878	1758	13075	Bacteria	Bacillota_A	Clostridia	Lachnospirales	Lachnospiraceae	UBA6987	UBA6987 sp902797385
Cow_SGB_1966	87.85	1.27	2258669	2029	108811	Bacteria	Bacillota_A	Clostridia	Lachnospirales	Lachnospiraceae	UBA6987	UBA6987 sp902789555
Cow_SGB_1967	81.94	0.63	2127382	1890	59983	Bacteria	Bacillota_A	Clostridia	Lachnospirales	Lachnospiraceae	UBA6987	UBA6987 sp902761665
Cow_SGB_1968	82.79	1.27	2133056	1895	77468	Bacteria	Bacillota_A	Clostridia	Lachnospirales	Lachnospiraceae	UBA6987	unclassified
Cow_SGB_1969	85.39	0.67	1888458	1713	29916	Bacteria	Bacillota_A	Clostridia	Lachnospirales	Lachnospiraceae	UBA6987	unclassified
Cow_SGB_1970	82.15	2.18	1642274	1603	9971	Bacteria	Bacillota_A	Clostridia	Lachnospirales	Lachnospiraceae	UBA6987	UBA6987 sp902803355
Cow_SGB_1971	80.63	0.79	1710503	1659	6770	Bacteria	Bacillota_A	Clostridia	Lachnospirales	Lachnospiraceae	UBA6987	UBA6987 sp902796695
Cow_SGB_1972	87.39	0.11	1915941	1724	21649	Bacteria	Bacillota_A	Clostridia	Lachnospirales	Lachnospiraceae	UBA6987	UBA6987 sp017428105
Cow_SGB_1973	83.68	2.13	1851040	1851	6631	Bacteria	Bacillota_A	Clostridia	Lachnospirales	Lachnospiraceae	UBA3774	UBA3774 sp902783095
Cow_SGB_1974	95.81	2.08	2706122	2376	61048	Bacteria	Bacillota_A	Clostridia	Lachnospirales	Lachnospiraceae	UBA3774	unclassified
Cow_SGB_1975	84.96	3.18	2531617	2222	14532	Bacteria	Bacillota_A	Clostridia	Lachnospirales	Lachnospiraceae	Butyrivibrio	Butyrivibrio sp017400305
Cow_SGB_1976	94.42	1.5	3002927	2523	21351	Bacteria	Bacillota_A	Clostridia	Lachnospirales	Lachnospiraceae	Butyrivibrio	Butyrivibrio sp017535945
Cow_SGB_1977	87.97	1.79	2331737	2240	8687	Bacteria	Bacillota_A	Clostridia	Lachnospirales	Lachnospiraceae	UBA1066	UBA1066 sp017420605
Cow_SGB_1978	80.27	4.47	2146765	2050	9388	Bacteria	Bacillota_A	Clostridia	Lachnospirales	Lachnospiraceae	UBA1066	unclassified
Cow_SGB_1979	84.24	7.03	2808748	2539	6580	Bacteria	Bacillota_A	Clostridia	Lachnospirales	Lachnospiraceae	Blautia_A	unclassified
Cow_SGB_1980	90.53	8.17	3301397	2934	14742	Bacteria	Bacillota_A	Clostridia	Lachnospirales	Lachnospiraceae	Bilifractor	Bilifractor sp002368795
Cow_SGB_1981	95.76	0.63	2290154	1955	52037	Bacteria	Bacillota_A	Clostridia	Lachnospirales	Lachnospiraceae	UBA1066	UBA1066 sp900320575
Cow_SGB_1982	92.58	1.62	2004961	1796	9432	Bacteria	Bacillota_A	Clostridia	Lachnospirales	Lachnospiraceae	UBA1066	UBA1066 sp902783325
Cow_SGB_1983	95.89	1.17	2236313	2028	10820	Bacteria	Bacillota_A	Clostridia	Lachnospirales	Lachnospiraceae	UBA1066	UBA1066 sp902766945
Cow_SGB_1984	89.1	4.28	2503723	2277	8305	Bacteria	Bacillota_A	Clostridia	Lachnospirales	Lachnospiraceae	UBA1066	UBA1066 sp902803505
Cow_SGB_1985	88.06	4.38	2396587	2551	4690	Bacteria	Bacillota_A	Clostridia	Lachnospirales	Lachnospiraceae	RGIG5636	RGIG5636 sp017513125
Cow_SGB_1986	80.47	3.27	2003283	1908	7384	Bacteria	Bacillota_A	Clostridia	Lachnospirales	Lachnospiraceae	CAG-791	CAG-791 sp002449595
Cow_SGB_1987	99.33	0	2505586	2285	88137	Bacteria	Bacillota_A	Clostridia	Lachnospirales	Lachnospiraceae	Eubacterium_F	Eubacterium_F sp900319095
Cow_SGB_1988	95.54	0.45	2238157	2124	18103	Bacteria	Bacillota_A	Clostridia	Lachnospirales	Lachnospiraceae	Eubacterium_I	Eubacterium_I sp000270305
Cow_SGB_1989	74.88	0.88	2809443	2759	19187	Bacteria	Bacillota_A	Clostridia	Lachnospirales	Lachnospiraceae	SIG307	unclassified
Cow_SGB_1990	98.1	2.15	3482686	3025	35301	Bacteria	Bacillota_A	Clostridia	Lachnospirales	Lachnospiraceae	UBA1066	UBA1066 sp900314565
Cow_SGB_1991	86.76	1.9	3876318	3751	12099	Bacteria	Bacillota_A	Clostridia	Lachnospirales	Lachnospiraceae	UBA1066	UBA1066 sp902785985
Cow_SGB_1992	93.99	0	2964702	2427	93589	Bacteria	Bacillota_A	Clostridia	Lachnospirales	Lachnospiraceae	UBA1066	UBA1066 sp902788035
Cow_SGB_1993	56.8	1.2	1929807	2108	4444	Bacteria	Bacillota_A	Clostridia	Lachnospirales	Lachnospiraceae	UBA1066	unclassified
Cow_SGB_1994	52.08	2.39	1964530	2170	3717	Bacteria	Bacillota_A	Clostridia	Lachnospirales	Lachnospiraceae	UBA1066	unclassified
Cow_SGB_1995	54.87	4.66	2322253	2782	3702	Bacteria	Bacillota_A	Clostridia	Lachnospirales	Lachnospiraceae	UBA1066	unclassified
Cow_SGB_1996	55.92	1.27	1959714	2029	4301	Bacteria	Bacillota_A	Clostridia	Lachnospirales	Lachnospiraceae	UBA1066	UBA1066 sp902776305
Cow_SGB_1997	98.58	0.63	4075429	3566	68752	Bacteria	Bacillota_A	Clostridia	Lachnospirales	Lachnospiraceae	UBA1066	UBA1066 sp902776305
Cow_SGB_1998	85.5	7.39	3357750	3118	6133	Bacteria	Bacillota_A	Clostridia	Lachnospirales	Lachnospiraceae	UBA1066	unclassified
[truncated: 5,268 more rows]
