# Supplementary material for: Nutritional gradients orchestrate spatiotemporal microbial assembly and adaptive evolution in the neonatal mammalian gut
Source: Research Square preprint supplement (doi:10.21203/rs.3.rs-7903532/v1), 2026-02-04
Supplement: Supplementary file 3 [file 3a6855417ae6c78dc7dd14d9.xlsx]

## Sheet: zone_snv_filtered_gene
Metabolism-related entries most enriched among EC-annotated genes with pN/pS > 1
query	COG category	Description	Preferred name	EC	KEGG_ko	KEGG pathway	CAZy	PFAMs	Number of mutated samples
Calf_SGB_0221_355	G	Belongs to the glycosyl hydrolase 1 family	bglH1	3.2.1.21	ko:K01223,ko:K05350	ko00010,ko00460,ko00500,ko00940,ko01100,ko01110	GT1	Glyco_hydro_1	26
Calf_SGB_0221_734	G	Belongs to the glycosyl hydrolase 1 family	-	3.2.1.21	ko:K05350	ko00460,ko00500,ko00940,ko01100,ko01110	-	Glyco_hydro_1	25
Calf_SGB_1037_564	G	Beta galactosidase small chain	-	3.2.1.23	ko:K01190	ko00052,ko00511,ko00600,ko01100	-	Bgal_small_N,DUF4981,Glyco_hydro_2,Glyco_hydro_2_C,Glyco_hydro_2_N,RicinB_lectin_2	28
Calf_SGB_1771_326	G	Beta galactosidase small chain	lacZ	3.2.1.23	ko:K01190	ko00052,ko00511,ko00600,ko01100	-	Bgal_small_N,DUF4981,Glyco_hydro_2,Glyco_hydro_2_C,Glyco_hydro_2_N	25
Calf_SGB_1101_205	G	Domain of unknown function (DUF4982)	-	3.2.1.23	ko:K01190	ko00052,ko00511,ko00600,ko01100	-	DUF4982,Glyco_hydro_2,Glyco_hydro_2_C,Glyco_hydro_2_N	25
Calf_SGB_1101_483	G	Beta-galactosidase trimerisation domain	-	3.2.1.23	ko:K12308	ko00052	-	Glyco_hydro_42,Glyco_hydro_42C,Glyco_hydro_42M	25
Calf_SGB_1101_2083	G	Fibronectin type III-like domain	-	3.2.1.21	ko:K05349	ko00460,ko00500,ko00940,ko01100,ko01110	GH3	Fn3-like,Glyco_hydro_3,Glyco_hydro_3_C	26
Calf_SGB_0670_210	G	hydrolase, family 3	bglB_4	3.2.1.21	ko:K05349	ko00460,ko00500,ko00940,ko01100,ko01110	GH3	Fn3-like,Glyco_hydro_3,Glyco_hydro_3_C	26
Calf_SGB_0670_549	G	Fibronectin type III-like domain	-	3.2.1.21	ko:K05349	ko00460,ko00500,ko00940,ko01100,ko01110	GH3	Fn3-like,Glyco_hydro_3,Glyco_hydro_3_C	25
Calf_SGB_0670_1567	G	Beta galactosidase small chain	-	3.2.1.23	ko:K01190	ko00052,ko00511,ko00600,ko01100	-	Bgal_small_N,DUF4981,Glyco_hydro_2,Glyco_hydro_2_C,Glyco_hydro_2_N	26
Calf_SGB_0670_2359	G	Glycosyl hydrolase family 3	bglB2	3.2.1.21	ko:K05349	ko00460,ko00500,ko00940,ko01100,ko01110	GH3	Fn3-like,Glyco_hydro_3,Glyco_hydro_3_C	25
Calf_SGB_1254_818	G	hydrolase, family 3	-	3.2.1.21	ko:K05349	ko00460,ko00500,ko00940,ko01100,ko01110	GH3	Fn3-like,Glyco_hydro_3,Glyco_hydro_3_C	25
