# Supplementary material for: Nutritional gradients orchestrate spatiotemporal microbial assembly and adaptive evolution in the neonatal mammalian gut
Source: Research Square preprint supplement (doi:10.21203/rs.3.rs-7903532/v1), 2026-02-04
Supplement: Supplementary file 4 [file 3f104bb3e20087f3e74c6844.xlsx]

## Sheet: Supplementary table S1
Sample collection information
Name	ID	From	Project	Sample ID	Run ID	Platform	Country	Segment
GaoFructose_01	MCM28_1	seq	PRJNA1042798	SAMN38328058	SRR26903476	Illumina HiSeq X	China	Rectum
GaoFructose_02	MCM23_3	seq	PRJNA1042798	SAMN38328057	SRR26903477	Illumina HiSeq X	China	Rectum
GaoFructose_03	MCM23_2	seq	PRJNA1042798	SAMN38328056	SRR26903478	Illumina HiSeq X	China	Rectum
GaoFructose_04	MCM23_1	seq	PRJNA1042798	SAMN38328055	SRR26903479	Illumina HiSeq X	China	Rectum
GaoFructose_05	MCM16_3	seq	PRJNA1042798	SAMN38328054	SRR26903480	Illumina HiSeq X	China	Rectum
GaoFructose_06	MCM16_2	seq	PRJNA1042798	SAMN38328053	SRR26903481	Illumina HiSeq X	China	Rectum
GaoFructose_07	MCM16_1	seq	PRJNA1042798	SAMN38328052	SRR26903482	Illumina HiSeq X	China	Rectum
GaoFructose_08	MFM7_3	seq	PRJNA1042798	SAMN38328078	SRR26903483	Illumina HiSeq X	China	Rectum
GaoFructose_09	MFM7_2	seq	PRJNA1042798	SAMN38328077	SRR26903484	Illumina HiSeq X	China	Rectum
GaoFructose_10	MFM7_1	seq	PRJNA1042798	SAMN38328076	SRR26903485	Illumina HiSeq X	China	Rectum
GaoFructose_11	MFM28_3	seq	PRJNA1042798	SAMN38328075	SRR26903486	Illumina HiSeq X	China	Rectum
GaoFructose_12	MFM28_2	seq	PRJNA1042798	SAMN38328074	SRR26903487	Illumina HiSeq X	China	Rectum
GaoFructose_13	MFM28_1	seq	PRJNA1042798	SAMN38328073	SRR26903488	Illumina HiSeq X	China	Rectum
GaoFructose_14	MFM23_3	seq	PRJNA1042798	SAMN38328072	SRR26903489	Illumina HiSeq X	China	Rectum
GaoFructose_15	MFM23_2	seq	PRJNA1042798	SAMN38328071	SRR26903490	Illumina HiSeq X	China	Rectum
GaoFructose_16	MFM23_1	seq	PRJNA1042798	SAMN38328070	SRR26903491	Illumina HiSeq X	China	Rectum
GaoFructose_17	MFM16_3	seq	PRJNA1042798	SAMN38328069	SRR26903492	Illumina HiSeq X	China	Rectum
GaoFructose_18	MCM1_3	seq	PRJNA1042798	SAMN38328051	SRR26903493	Illumina HiSeq X	China	Rectum
GaoFructose_19	MFM16_2	seq	PRJNA1042798	SAMN38328068	SRR26903494	Illumina HiSeq X	China	Rectum
GaoFructose_20	MFM16_1	seq	PRJNA1042798	SAMN38328067	SRR26903495	Illumina HiSeq X	China	Rectum
GaoFructose_21	MFM1_3	seq	PRJNA1042798	SAMN38328066	SRR26903496	Illumina HiSeq X	China	Rectum
GaoFructose_22	MFM1_2	seq	PRJNA1042798	SAMN38328065	SRR26903497	Illumina HiSeq X	China	Rectum
GaoFructose_23	MFM1_1	seq	PRJNA1042798	SAMN38328064	SRR26903498	Illumina HiSeq X	China	Rectum
GaoFructose_24	MCM7_3	seq	PRJNA1042798	SAMN38328063	SRR26903499	Illumina HiSeq X	China	Rectum
GaoFructose_25	MCM7_2	seq	PRJNA1042798	SAMN38328062	SRR26903500	Illumina HiSeq X	China	Rectum
GaoFructose_26	MCM7_1	seq	PRJNA1042798	SAMN38328061	SRR26903501	Illumina HiSeq X	China	Rectum
GaoFructose_27	MCM28_3	seq	PRJNA1042798	SAMN38328060	SRR26903502	Illumina HiSeq X	China	Rectum
GaoFructose_28	MCM28_2	seq	PRJNA1042798	SAMN38328059	SRR26903503	Illumina HiSeq X	China	Rectum
GaoFructose_29	MCM1_2	seq	PRJNA1042798	SAMN38328050	SRR26903504	Illumina HiSeq X	China	Rectum
GaoFructose_30	MCM1_1	seq	PRJNA1042798	SAMN38328049	SRR26903505	Illumina HiSeq X	China	Rectum
TaoSegment_01	SN2	seq	PRJNA1153624	SAMN44339101	SRR31127864	Illumina HiSeq X	China	Omasum
TaoSegment_02	ZN6	seq	PRJNA1153624	SAMN44339118	SRR31127863	Illumina HiSeq X	China	Omasum
TaoSegment_03	HN7	seq	PRJNA1153624	SAMN44339064	SRR31127847	Illumina HiSeq X	China	Omasum
TaoSegment_04	WN3	seq	PRJNA1153624	SAMN44339109	SRR31127872	Illumina HiSeq X	China	Omasum
TaoSegment_05	BN2	seq	PRJNA1153624	SAMN44339053	SRR31127835	Illumina HiSeq X	China	Omasum
TaoSegment_06	SN4	seq	PRJNA1153624	SAMN44339103	SRR31127866	Illumina HiSeq X	China	Omasum
TaoSegment_07	HN1	seq	PRJNA1153624	SAMN44339059	SRR31127841	Illumina HiSeq X	China	Omasum
TaoSegment_08	SN1	seq	PRJNA1153624	SAMN44339100	SRR31127862	Illumina HiSeq X	China	Ileum
TaoSegment_09	BN4	seq	PRJNA1153624	SAMN44339055	SRR31127837	Illumina HiSeq X	China	Ileum
TaoSegment_10	HN6	seq	PRJNA1153624	SAMN44339063	SRR31127846	Illumina HiSeq X	China	Ileum
TaoSegment_11	LN6	seq	PRJNA1153624	SAMN44339083	SRR31127823	Illumina HiSeq X	China	Ileum
TaoSegment_12	LN3	seq	PRJNA1153624	SAMN44339081	SRR31127821	Illumina HiSeq X	China	Ileum
TaoSegment_13	HN2	seq	PRJNA1153624	SAMN44339060	SRR31127842	Illumina HiSeq X	China	Ileum
TaoSegment_14	BN6	seq	PRJNA1153624	SAMN44339056	SRR31127838	Illumina HiSeq X	China	Ileum
TaoSegment_15	KN4	seq	PRJNA1153624	SAMN44339075	SRR31127814	Illumina HiSeq X	China	Colon
TaoSegment_16	WN6	seq	PRJNA1153624	SAMN44339111	SRR31127831	Illumina HiSeq X	China	Colon
TaoSegment_17	SN3	seq	PRJNA1153624	SAMN44339102	SRR31127865	Illumina HiSeq X	China	Colon
TaoSegment_18	LN7	seq	PRJNA1153624	SAMN44339084	SRR31127824	Illumina HiSeq X	China	Colon
TaoSegment_19	MN2	seq	PRJNA1153624	SAMN44339087	SRR31127827	Illumina HiSeq X	China	Colon
TaoSegment_20	SN7	seq	PRJNA1153624	SAMN44339105	SRR31127868	Illumina HiSeq X	China	Colon
TaoSegment_21	ZN7	seq	PRJNA1153624	SAMN44339119	SRR31127874	Illumina HiSeq X	China	Colon
TaoSegment_22	WN8	seq	PRJNA1153624	SAMN44339113	SRR31127833	Illumina HiSeq X	China	Jejunum
TaoSegment_23	WN4	seq	PRJNA1153624	SAMN44339110	SRR31127873	Illumina HiSeq X	China	Jejunum
TaoSegment_24	LN4	seq	PRJNA1153624	SAMN44339082	SRR31127822	Illumina HiSeq X	China	Jejunum
TaoSegment_25	MN6	seq	PRJNA1153624	SAMN44339090	SRR31127830	Illumina HiSeq X	China	Jejunum
TaoSegment_26	ZN1	seq	PRJNA1153624	SAMN44339114	SRR31127843	Illumina HiSeq X	China	Jejunum
TaoSegment_27	LN2	seq	PRJNA1153624	SAMN44339080	SRR31127819	Illumina HiSeq X	China	Jejunum
TaoSegment_28	WN7	seq	PRJNA1153624	SAMN44339112	SRR31127832	Illumina HiSeq X	China	Rumen
TaoSegment_29	MN1	seq	PRJNA1153624	SAMN44339086	SRR31127826	Illumina HiSeq X	China	Rumen
TaoSegment_30	WN2	seq	PRJNA1153624	SAMN44339108	SRR31127871	Illumina HiSeq X	China	Rumen
TaoSegment_31	KN6	seq	PRJNA1153624	SAMN44339077	SRR31127816	Illumina HiSeq X	China	Rumen
TaoSegment_32	WN1	seq	PRJNA1153624	SAMN44339107	SRR31127870	Illumina HiSeq X	China	Rumen
TaoSegment_33	LN1	seq	PRJNA1153624	SAMN44339079	SRR31127818	Illumina HiSeq X	China	Rumen
TaoSegment_34	LN8	seq	PRJNA1153624	SAMN44339085	SRR31127825	Illumina HiSeq X	China	Rumen
TaoSegment_35	JN4	seq	PRJNA1153624	SAMN44339069	SRR31127807	Illumina HiSeq X	China	Cecum
TaoSegment_36	KN3	seq	PRJNA1153624	SAMN44339074	SRR31127813	Illumina HiSeq X	China	Cecum
TaoSegment_37	BN1	seq	PRJNA1153624	SAMN44339052	SRR31127834	Illumina HiSeq X	China	Cecum
TaoSegment_38	HN4	seq	PRJNA1153624	SAMN44339062	SRR31127845	Illumina HiSeq X	China	Cecum
TaoSegment_39	RN8	seq	PRJNA1153624	SAMN44339099	SRR31127861	Illumina HiSeq X	China	Cecum
TaoSegment_40	MN3	seq	PRJNA1153624	SAMN44339088	SRR31127828	Illumina HiSeq X	China	Cecum
TaoSegment_41	HN3	seq	PRJNA1153624	SAMN44339061	SRR31127844	Illumina HiSeq X	China	Cecum
TaoSegment_42	JN3	seq	PRJNA1153624	SAMN44339068	SRR31127851	Illumina HiSeq X	China	Rectum
TaoSegment_43	RN4	seq	PRJNA1153624	SAMN44339096	SRR31127858	Illumina HiSeq X	China	Rectum
TaoSegment_44	HN8	seq	PRJNA1153624	SAMN44339065	SRR31127848	Illumina HiSeq X	China	Rectum
TaoSegment_45	SN6	seq	PRJNA1153624	SAMN44339104	SRR31127867	Illumina HiSeq X	China	Rectum
TaoSegment_46	KN7	seq	PRJNA1153624	SAMN44339078	SRR31127817	Illumina HiSeq X	China	Rectum
TaoSegment_47	RN7	seq	PRJNA1153624	SAMN44339098	SRR31127860	Illumina HiSeq X	China	Rectum
TaoSegment_48	MN4	seq	PRJNA1153624	SAMN44339089	SRR31127829	Illumina HiSeq X	China	Rectum
TaoSegment_49	ZN8	seq	PRJNA1153624	SAMN44339120	SRR31127875	Illumina HiSeq X	China	Duodenum
TaoSegment_50	BN3	seq	PRJNA1153624	SAMN44339054	SRR31127836	Illumina HiSeq X	China	Duodenum
TaoSegment_51	JN6	seq	PRJNA1153624	SAMN44339070	SRR31127808	Illumina HiSeq X	China	Duodenum
TaoSegment_52	JN8	seq	PRJNA1153624	SAMN44339072	SRR31127811	Illumina HiSeq X	China	Duodenum
TaoSegment_53	BN8	seq	PRJNA1153624	SAMN44339058	SRR31127840	Illumina HiSeq X	China	Duodenum
TaoSegment_54	RN6	seq	PRJNA1153624	SAMN44339097	SRR31127859	Illumina HiSeq X	China	Duodenum
TaoSegment_55	MN7	seq	PRJNA1153624	SAMN44339091	SRR31127853	Illumina HiSeq X	China	Duodenum
TaoSegment_56	SN8	seq	PRJNA1153624	SAMN44339106	SRR31127869	Illumina HiSeq X	China	Reticulum
TaoSegment_57	RN2	seq	PRJNA1153624	SAMN44339094	SRR31127856	Illumina HiSeq X	China	Reticulum
TaoSegment_58	ZN3	seq	PRJNA1153624	SAMN44339116	SRR31127820	Illumina HiSeq X	China	Reticulum
TaoSegment_59	BN7	seq	PRJNA1153624	SAMN44339057	SRR31127839	Illumina HiSeq X	China	Reticulum
TaoSegment_60	RN1	seq	PRJNA1153624	SAMN44339093	SRR31127855	Illumina HiSeq X	China	Reticulum
TaoSegment_61	ZN2	seq	PRJNA1153624	SAMN44339115	SRR31127809	Illumina HiSeq X	China	Reticulum
TaoSegment_62	JN7	seq	PRJNA1153624	SAMN44339071	SRR31127810	Illumina HiSeq X	China	Reticulum
TaoSegment_63	JN2	seq	PRJNA1153624	SAMN44339067	SRR31127850	Illumina HiSeq X	China	Abomasum
TaoSegment_64	ZN4	seq	PRJNA1153624	SAMN44339117	SRR31127852	Illumina HiSeq X	China	Abomasum
TaoSegment_65	KN2	seq	PRJNA1153624	SAMN44339073	SRR31127812	Illumina HiSeq X	China	Abomasum
TaoSegment_66	MN8	seq	PRJNA1153624	SAMN44339092	SRR31127854	Illumina HiSeq X	China	Abomasum
TaoSegment_67	RN3	seq	PRJNA1153624	SAMN44339095	SRR31127857	Illumina HiSeq X	China	Abomasum
TaoSegment_68	JN1	seq	PRJNA1153624	SAMN44339066	SRR31127849	Illumina HiSeq X	China	Abomasum
TaoSegment_69	KN5	seq	PRJNA1153624	SAMN44339076	SRR31127815	Illumina HiSeq X	China	Abomasum
Env200S_001	G9_1	Seq	PRJNA1153624	SAMN44499625	SRR31154671	Illumina HiSeq X	China	Feces
Env200S_002	G9_13	Seq	PRJNA1153624	SAMN44499624	SRR31154672	Illumina HiSeq X	China	Feces
Env200S_003	G8_7	Seq	PRJNA1153624	SAMN44499623	SRR31154673	Illumina HiSeq X	China	Feces
Env200S_004	G8_3	Seq	PRJNA1153624	SAMN44499622	SRR31154674	Illumina HiSeq X	China	Feces
Env200S_005	G8_28	Seq	PRJNA1153624	SAMN44499621	SRR31154675	Illumina HiSeq X	China	Feces
Env200S_006	G8_1	Seq	PRJNA1153624	SAMN44499620	SRR31154676	Illumina HiSeq X	China	Feces
Env200S_007	Y8_28	Seq	PRJNA1153624	SAMN44499722	SRR31154678	Illumina HiSeq X	China	Feces
Env200S_008	Y8_14	Seq	PRJNA1153624	SAMN44499721	SRR31154679	Illumina HiSeq X	China	Feces
Env200S_009	Y6_28	Seq	PRJNA1153624	SAMN44499720	SRR31154680	Illumina HiSeq X	China	Feces
Env200S_010	Y6_14	Seq	PRJNA1153624	SAMN44499719	SRR31154681	Illumina HiSeq X	China	Feces
Env200S_011	Y5_28	Seq	PRJNA1153624	SAMN44499717	SRR31154683	Illumina HiSeq X	China	Feces
Env200S_012	Y5_14	Seq	PRJNA1153624	SAMN44499716	SRR31154684	Illumina HiSeq X	China	Feces
Env200S_013	CF6_1	Seq	PRJNA1153624	SAMN44499545	SRR31154685	Illumina HiSeq X	China	Feces
Env200S_014	Y4_28	Seq	PRJNA1153624	SAMN44499714	SRR31154687	Illumina HiSeq X	China	Feces
Env200S_015	Y4_14	Seq	PRJNA1153624	SAMN44499713	SRR31154688	Illumina HiSeq X	China	Feces
Env200S_016	Y18_28	Seq	PRJNA1153624	SAMN44499709	SRR31154692	Illumina HiSeq X	China	Feces
Env200S_017	Y18_14	Seq	PRJNA1153624	SAMN44499708	SRR31154693	Illumina HiSeq X	China	Feces
Env200S_018	Y17_28	Seq	PRJNA1153624	SAMN44499707	SRR31154694	Illumina HiSeq X	China	Feces
Env200S_019	Y17_14	Seq	PRJNA1153624	SAMN44499706	SRR31154695	Illumina HiSeq X	China	Feces
Env200S_020	CF6-13	Seq	PRJNA1153624	SAMN44499544	SRR31154696	Illumina HiSeq X	China	Feces
Env200S_021	Y16_28	Seq	PRJNA1153624	SAMN44499705	SRR31154697	Illumina HiSeq X	China	Feces
Env200S_022	Y16_14	Seq	PRJNA1153624	SAMN44499704	SRR31154698	Illumina HiSeq X	China	Feces
Env200S_023	Y15_28	Seq	PRJNA1153624	SAMN44499703	SRR31154699	Illumina HiSeq X	China	Feces
Env200S_024	Y15_14	Seq	PRJNA1153624	SAMN44499702	SRR31154700	Illumina HiSeq X	China	Feces
Env200S_025	Y12_28	Seq	PRJNA1153624	SAMN44499701	SRR31154701	Illumina HiSeq X	China	Feces
Env200S_026	Y12_14	Seq	PRJNA1153624	SAMN44499700	SRR31154702	Illumina HiSeq X	China	Feces
Env200S_027	G6_7	Seq	PRJNA1153624	SAMN44499619	SRR31154705	Illumina HiSeq X	China	Feces
Env200S_028	G6_3	Seq	PRJNA1153624	SAMN44499618	SRR31154706	Illumina HiSeq X	China	Feces
Env200S_029	G6_28	Seq	PRJNA1153624	SAMN44499617	SRR31154707	Illumina HiSeq X	China	Feces
Env200S_030	G6_1	Seq	PRJNA1153624	SAMN44499616	SRR31154708	Illumina HiSeq X	China	Feces
Env200S_031	CF2_7	Seq	PRJNA1153624	SAMN44499535	SRR31154709	Illumina HiSeq X	China	Feces
Env200S_032	G6_13	Seq	PRJNA1153624	SAMN44499615	SRR31154710	Illumina HiSeq X	China	Feces
Env200S_033	G5_7	Seq	PRJNA1153624	SAMN44499614	SRR31154711	Illumina HiSeq X	China	Feces
Env200S_034	G5_3	Seq	PRJNA1153624	SAMN44499613	SRR31154712	Illumina HiSeq X	China	Feces
Env200S_035	G5_28	Seq	PRJNA1153624	SAMN44499612	SRR31154713	Illumina HiSeq X	China	Feces
Env200S_036	G5_1	Seq	PRJNA1153624	SAMN44499611	SRR31154714	Illumina HiSeq X	China	Feces
Env200S_037	G5_13	Seq	PRJNA1153624	SAMN44499610	SRR31154715	Illumina HiSeq X	China	Feces
Env200S_038	G4_7	Seq	PRJNA1153624	SAMN44499609	SRR31154716	Illumina HiSeq X	China	Feces
Env200S_039	G4_3	Seq	PRJNA1153624	SAMN44499608	SRR31154717	Illumina HiSeq X	China	Feces
Env200S_040	G4_28	Seq	PRJNA1153624	SAMN44499607	SRR31154718	Illumina HiSeq X	China	Feces
Env200S_041	G4_1	Seq	PRJNA1153624	SAMN44499606	SRR31154719	Illumina HiSeq X	China	Feces
Env200S_042	CF2_3	Seq	PRJNA1153624	SAMN44499534	SRR31154720	Illumina HiSeq X	China	Feces
Env200S_043	G4_13	Seq	PRJNA1153624	SAMN44499605	SRR31154721	Illumina HiSeq X	China	Feces
Env200S_044	G18_7	Seq	PRJNA1153624	SAMN44499604	SRR31154722	Illumina HiSeq X	China	Feces
Env200S_045	G18_3	Seq	PRJNA1153624	SAMN44499603	SRR31154723	Illumina HiSeq X	China	Feces
Env200S_046	G18_28	Seq	PRJNA1153624	SAMN44499602	SRR31154724	Illumina HiSeq X	China	Feces
Env200S_047	G18_1	Seq	PRJNA1153624	SAMN44499601	SRR31154725	Illumina HiSeq X	China	Feces
Env200S_048	G18_13	Seq	PRJNA1153624	SAMN44499600	SRR31154726	Illumina HiSeq X	China	Feces
Env200S_049	G17_7	Seq	PRJNA1153624	SAMN44499599	SRR31154727	Illumina HiSeq X	China	Feces
Env200S_050	G17_3	Seq	PRJNA1153624	SAMN44499598	SRR31154728	Illumina HiSeq X	China	Rumen
Env200S_051	G17_28	Seq	PRJNA1153624	SAMN44499597	SRR31154729	Illumina HiSeq X	China	Rumen
Env200S_052	G17_1	Seq	PRJNA1153624	SAMN44499596	SRR31154730	Illumina HiSeq X	China	Rumen
Env200S_053	CF2_1	Seq	PRJNA1153624	SAMN44499533	SRR31154731	Illumina HiSeq X	China	Rumen
Env200S_054	G17_13	Seq	PRJNA1153624	SAMN44499595	SRR31154732	Illumina HiSeq X	China	Rumen
Env200S_055	CF4_7	Seq	PRJNA1153624	SAMN44499543	SRR31154735	Illumina HiSeq X	China	Rumen
Env200S_056	TF8	Seq	PRJNA1153624	SAMN44499693	SRR31154738	Illumina HiSeq X	China	Rumen
Env200S_057	TF6	Seq	PRJNA1153624	SAMN44499692	SRR31154739	Illumina HiSeq X	China	Rumen
Env200S_058	TF4	Seq	PRJNA1153624	SAMN44499691	SRR31154740	Illumina HiSeq X	China	Rumen
Env200S_059	TF3	Seq	PRJNA1153624	SAMN44499690	SRR31154741	Illumina HiSeq X	China	Rumen
Env200S_060	TF2	Seq	PRJNA1153624	SAMN44499689	SRR31154742	Illumina HiSeq X	China	Rumen
Env200S_061	TF1	Seq	PRJNA1153624	SAMN44499688	SRR31154743	Illumina HiSeq X	China	Rumen
Env200S_062	CF4_3	Seq	PRJNA1153624	SAMN44499542	SRR31154746	Illumina HiSeq X	China	Rumen
Env200S_063	CF4_1	Seq	PRJNA1153624	SAMN44499541	SRR31154757	Illumina HiSeq X	China	Rumen
Env200S_064	CF8-7	Seq	PRJNA1153624	SAMN44499555	SRR31154776	Illumina HiSeq X	China	Rumen
Env200S_065	CF8-3	Seq	PRJNA1153624	SAMN44499554	SRR31154777	Illumina HiSeq X	China	Rumen
Env200S_066	CF8-1	Seq	PRJNA1153624	SAMN44499553	SRR31154778	Illumina HiSeq X	China	Rumen
Env200S_067	CF8-13	Seq	PRJNA1153624	SAMN44499552	SRR31154779	Illumina HiSeq X	China	Rumen
Env200S_068	CF7-7	Seq	PRJNA1153624	SAMN44499551	SRR31154780	Illumina HiSeq X	China	Rumen
Env200S_069	CF7-3	Seq	PRJNA1153624	SAMN44499550	SRR31154781	Illumina HiSeq X	China	Rumen
Env200S_070	CF7-1	Seq	PRJNA1153624	SAMN44499549	SRR31154782	Illumina HiSeq X	China	Rumen
Env200S_071	CF7-13	Seq	PRJNA1153624	SAMN44499548	SRR31154783	Illumina HiSeq X	China	Rumen
Env200S_072	CF6-7	Seq	PRJNA1153624	SAMN44499547	SRR31154784	Illumina HiSeq X	China	Rumen
Env200S_073	CF6_3	Seq	PRJNA1153624	SAMN44499546	SRR31154785	Illumina HiSeq X	China	Rumen
Env200S_074	Y9_28	Seq	PRJNA1153624	SAMN44499725	SRR31154787	Illumina HiSeq X	China	Rumen
Env200S_075	Y9_14	Seq	PRJNA1153624	SAMN44499724	SRR31154788	Illumina HiSeq X	China	Rumen
Env200S_076	LY9_21	Seq	PRJNA1153624	SAMN44499669	SRR31154792	Illumina HiSeq X	China	Rumen
Env200S_077	LY9_10	Seq	PRJNA1153624	SAMN44499668	SRR31154793	Illumina HiSeq X	China	Rumen
Env200S_078	LY8_21	Seq	PRJNA1153624	SAMN44499667	SRR31154794	Illumina HiSeq X	China	Rumen
Env200S_079	LY8_10	Seq	PRJNA1153624	SAMN44499666	SRR31154795	Illumina HiSeq X	China	Rumen
Env200S_080	CF4_13	Seq	PRJNA1153624	SAMN44499540	SRR31154796	Illumina HiSeq X	China	Rumen
Env200S_081	LY6_21	Seq	PRJNA1153624	SAMN44499665	SRR31154797	Illumina HiSeq X	China	Feces
Env200S_082	LY6_10	Seq	PRJNA1153624	SAMN44499664	SRR31154798	Illumina HiSeq X	China	Feces
Env200S_083	LY5_21	Seq	PRJNA1153624	SAMN44499663	SRR31154799	Illumina HiSeq X	China	Feces
Env200S_084	LY5_10	Seq	PRJNA1153624	SAMN44499662	SRR31154800	Illumina HiSeq X	China	Feces
Env200S_085	LY4_21	Seq	PRJNA1153624	SAMN44499661	SRR31154801	Illumina HiSeq X	China	Feces
Env200S_086	LY4_10	Seq	PRJNA1153624	SAMN44499660	SRR31154802	Illumina HiSeq X	China	Feces
Env200S_087	LY18_21	Seq	PRJNA1153624	SAMN44499659	SRR31154803	Illumina HiSeq X	China	Feces
Env200S_088	LY18_10	Seq	PRJNA1153624	SAMN44499658	SRR31154804	Illumina HiSeq X	China	Feces
Env200S_089	LY17_21	Seq	PRJNA1153624	SAMN44499657	SRR31154805	Illumina HiSeq X	China	Feces
Env200S_090	LY17_10	Seq	PRJNA1153624	SAMN44499656	SRR31154806	Illumina HiSeq X	China	Feces
Env200S_091	CF3_7	Seq	PRJNA1153624	SAMN44499539	SRR31154807	Illumina HiSeq X	China	Feces
Env200S_092	LY16_21	Seq	PRJNA1153624	SAMN44499655	SRR31154808	Illumina HiSeq X	China	Feces
Env200S_093	LY16_10	Seq	PRJNA1153624	SAMN44499654	SRR31154809	Illumina HiSeq X	China	Feces
Env200S_094	LY15_21	Seq	PRJNA1153624	SAMN44499653	SRR31154810	Illumina HiSeq X	China	Feces
Env200S_095	LY15_10	Seq	PRJNA1153624	SAMN44499652	SRR31154811	Illumina HiSeq X	China	Feces
Env200S_096	LY12_21	Seq	PRJNA1153624	SAMN44499651	SRR31154812	Illumina HiSeq X	China	Feces
Env200S_097	LY12_10	Seq	PRJNA1153624	SAMN44499650	SRR31154813	Illumina HiSeq X	China	Feces
Env200S_098	LG9_28	Seq	PRJNA1153624	SAMN44499649	SRR31154814	Illumina HiSeq X	China	Feces
Env200S_099	G16_7	Seq	PRJNA1153624	SAMN44499594	SRR31154815	Illumina HiSeq X	China	Feces
Env200S_100	LG8_28	Seq	PRJNA1153624	SAMN44499648	SRR31154816	Illumina HiSeq X	China	Feces
Env200S_101	G16_3	Seq	PRJNA1153624	SAMN44499593	SRR31154817	Illumina HiSeq X	China	Meconium
Env200S_102	G16_28	Seq	PRJNA1153624	SAMN44499592	SRR31154818	Illumina HiSeq X	China	Meconium
Env200S_103	G16_1	Seq	PRJNA1153624	SAMN44499591	SRR31154819	Illumina HiSeq X	China	Meconium
Env200S_104	G16_13	Seq	PRJNA1153624	SAMN44499590	SRR31154820	Illumina HiSeq X	China	Meconium
Env200S_105	G15_7	Seq	PRJNA1153624	SAMN44499589	SRR31154821	Illumina HiSeq X	China	Meconium
Env200S_106	G15_3	Seq	PRJNA1153624	SAMN44499588	SRR31154822	Illumina HiSeq X	China	Meconium
Env200S_107	G15_28	Seq	PRJNA1153624	SAMN44499587	SRR31154823	Illumina HiSeq X	China	Feces
Env200S_108	G15_1	Seq	PRJNA1153624	SAMN44499586	SRR31154824	Illumina HiSeq X	China	Feces
Env200S_109	CF2_13	Seq	PRJNA1153624	SAMN44499532	SRR31154825	Illumina HiSeq X	China	Feces
Env200S_110	G15_13	Seq	PRJNA1153624	SAMN44499585	SRR31154826	Illumina HiSeq X	China	Feces
Env200S_111	G12_7	Seq	PRJNA1153624	SAMN44499584	SRR31154827	Illumina HiSeq X	China	Feces
Env200S_112	G12_3	Seq	PRJNA1153624	SAMN44499583	SRR31154828	Illumina HiSeq X	China	Feces
Env200S_113	G12_28	Seq	PRJNA1153624	SAMN44499582	SRR31154829	Illumina HiSeq X	China	Feces
Env200S_114	G12_1	Seq	PRJNA1153624	SAMN44499581	SRR31154830	Illumina HiSeq X	China	Feces
Env200S_115	G12_13	Seq	PRJNA1153624	SAMN44499580	SRR31154831	Illumina HiSeq X	China	Feces
Env200S_116	LG7_28	Seq	PRJNA1153624	SAMN44499647	SRR31154844	Illumina HiSeq X	China	Feces
Env200S_117	LG6_28	Seq	PRJNA1153624	SAMN44499646	SRR31154845	Illumina HiSeq X	China	Feces
Env200S_118	CF3_3	Seq	PRJNA1153624	SAMN44499538	SRR31154846	Illumina HiSeq X	China	Feces
Env200S_119	LG5_28	Seq	PRJNA1153624	SAMN44499645	SRR31154847	Illumina HiSeq X	China	Feces
Env200S_120	LG4_28	Seq	PRJNA1153624	SAMN44499644	SRR31154848	Illumina HiSeq X	China	Feces
Env200S_121	LG18_28	Seq	PRJNA1153624	SAMN44499643	SRR31154849	Illumina HiSeq X	China	Feces
Env200S_122	LG17_28	Seq	PRJNA1153624	SAMN44499642	SRR31154850	Illumina HiSeq X	China	Feces
Env200S_123	LG16_28	Seq	PRJNA1153624	SAMN44499641	SRR31154851	Illumina HiSeq X	China	Feces
Env200S_124	LG15_28	Seq	PRJNA1153624	SAMN44499640	SRR31154852	Illumina HiSeq X	China	Feces
Env200S_125	LG12_28	Seq	PRJNA1153624	SAMN44499639	SRR31154853	Illumina HiSeq X	China	Feces
Env200S_126	CF3_1	Seq	PRJNA1153624	SAMN44499537	SRR31154857	Illumina HiSeq X	China	Feces
Env200S_127	G9_7	Seq	PRJNA1153624	SAMN44499628	SRR31154865	Illumina HiSeq X	China	Feces
Env200S_128	G9_3	Seq	PRJNA1153624	SAMN44499627	SRR31154866	Illumina HiSeq X	China	Feces
Env200S_129	G9_28	Seq	PRJNA1153624	SAMN44499626	SRR31154867	Illumina HiSeq X	China	Feces
Env200S_130	CF3_13	Seq	PRJNA1153624	SAMN44499536	SRR31154868	Illumina HiSeq X	China	Feces
NCBI_001	a1	NCBI	PRJNA563872	SAMN12691792	SRR10098302	Illumina NextSeq 500	USA	Feces
NCBI_002	a2	NCBI	PRJNA563872	SAMN12692661	SRR10098303	Illumina NextSeq 500	USA	Feces
NCBI_003	a3	NCBI	PRJNA563872	SAMN12692662	SRR10098304	Illumina NextSeq 500	USA	Feces
NCBI_004	a4	NCBI	PRJNA563872	SAMN12692663	SRR10098305	Illumina NextSeq 500	USA	Feces
NCBI_005	a5	NCBI	PRJNA563872	SAMN12692664	SRR10098307	Illumina NextSeq 500	USA	Feces
NCBI_006	a6	NCBI	PRJNA563872	SAMN12692665	SRR10098308	Illumina NextSeq 500	USA	Feces
NCBI_007	a7	NCBI	PRJNA563872	SAMN12692666	SRR10098309	Illumina NextSeq 500	USA	Feces
NCBI_008	a8	NCBI	PRJNA563872	SAMN12692667	SRR10098310	Illumina NextSeq 500	USA	Feces
NCBI_009	a9	NCBI	PRJNA563872	SAMN12692668	SRR10098311	Illumina NextSeq 500	USA	Feces
NCBI_010	a10	NCBI	PRJNA563872	SAMN12692669	SRR10098312	Illumina NextSeq 500	USA	Feces
NCBI_011	a11	NCBI	PRJNA563872	SAMN12692670	SRR10098313	Illumina NextSeq 500	USA	Feces
NCBI_012	a12	NCBI	PRJNA563872	SAMN12692671	SRR10098314	Illumina NextSeq 500	USA	Feces
NCBI_013	a13	NCBI	PRJNA563872	SAMN12692672	SRR10098315	Illumina NextSeq 500	USA	Feces
NCBI_014	a14	NCBI	PRJNA563872	SAMN12692673	SRR10098316	Illumina NextSeq 500	USA	Feces
NCBI_015	a15	NCBI	PRJNA563872	SAMN12692674	SRR10098318	Illumina NextSeq 500	USA	Feces
NCBI_016	a16	NCBI	PRJNA563872	SAMN12692675	SRR10098319	Illumina NextSeq 500	USA	Feces
NCBI_017	a17	NCBI	PRJNA563872	SAMN12692676	SRR10098320	Illumina NextSeq 500	USA	Feces
NCBI_018	b1	NCBI	PRJNA897887	SAMN31819164	SRR22359510	Illumina NextSeq 500	Canada	Feces
NCBI_019	b2	NCBI	PRJNA897887	SAMN31819165	SRR22359509	Illumina NextSeq 500	Canada	Feces
NCBI_020	b3	NCBI	PRJNA897887	SAMN31819166	SRR22359498	Illumina NextSeq 500	Canada	Feces
NCBI_021	b4	NCBI	PRJNA897887	SAMN31819167	SRR22359487	Illumina NextSeq 500	Canada	Feces
NCBI_022	b5	NCBI	PRJNA897887	SAMN31819168	SRR22359485	Illumina NextSeq 500	Canada	Feces
NCBI_023	b6	NCBI	PRJNA897887	SAMN31819169	SRR22359484	Illumina NextSeq 500	Canada	Feces
NCBI_024	b7	NCBI	PRJNA897887	SAMN31819170	SRR22359483	Illumina NextSeq 500	Canada	Feces
NCBI_025	b8	NCBI	PRJNA897887	SAMN31819171	SRR22359482	Illumina NextSeq 500	Canada	Feces
NCBI_026	b9	NCBI	PRJNA897887	SAMN31819172	SRR22359481	Illumina NextSeq 500	Canada	Feces
NCBI_027	b10	NCBI	PRJNA897887	SAMN31819173	SRR22359480	Illumina NextSeq 500	Canada	Feces
NCBI_028	b11	NCBI	PRJNA897887	SAMN31819174	SRR22359508	Illumina NextSeq 500	Canada	Feces
NCBI_029	b12	NCBI	PRJNA897887	SAMN31819175	SRR22359507	Illumina NextSeq 500	Canada	Feces
NCBI_030	b13	NCBI	PRJNA897887	SAMN31819176	SRR22359506	Illumina NextSeq 500	Canada	Feces
NCBI_031	b14	NCBI	PRJNA897887	SAMN31819177	SRR22359505	Illumina NextSeq 500	Canada	Feces
NCBI_032	b15	NCBI	PRJNA897887	SAMN31819178	SRR22359504	Illumina NextSeq 500	Canada	Feces
NCBI_033	b16	NCBI	PRJNA897887	SAMN31819179	SRR22359503	Illumina NextSeq 500	Canada	Feces
NCBI_034	b17	NCBI	PRJNA897887	SAMN31819180	SRR22359502	Illumina NextSeq 500	Canada	Feces
NCBI_035	b18	NCBI	PRJNA897887	SAMN31819181	SRR22359501	Illumina NextSeq 500	Canada	Feces
NCBI_036	b19	NCBI	PRJNA897887	SAMN31819182	SRR22359500	Illumina NextSeq 500	Canada	Feces
NCBI_037	b20	NCBI	PRJNA897887	SAMN31819183	SRR22359499	Illumina NextSeq 500	Canada	Feces
NCBI_038	b21	NCBI	PRJNA897887	SAMN31819184	SRR22359497	Illumina NextSeq 500	Canada	Feces
NCBI_039	b22	NCBI	PRJNA897887	SAMN31819185	SRR22359496	Illumina NextSeq 500	Canada	Feces
NCBI_040	b23	NCBI	PRJNA897887	SAMN31819186	SRR22359495	Illumina NextSeq 500	Canada	Feces
NCBI_041	b24	NCBI	PRJNA897887	SAMN31819187	SRR22359494	Illumina NextSeq 500	Canada	Feces
NCBI_042	b25	NCBI	PRJNA897887	SAMN31819188	SRR22359493	Illumina NextSeq 500	Canada	Feces
NCBI_043	b26	NCBI	PRJNA897887	SAMN31819189	SRR22359492	Illumina NextSeq 500	Canada	Feces
NCBI_044	b27	NCBI	PRJNA897887	SAMN31819190	SRR22359491	Illumina NextSeq 500	Canada	Feces
NCBI_045	b28	NCBI	PRJNA897887	SAMN31819191	SRR22359490	Illumina NextSeq 500	Canada	Feces
NCBI_046	b29	NCBI	PRJNA897887	SAMN31819192	SRR22359489	Illumina NextSeq 500	Canada	Feces
NCBI_047	b30	NCBI	PRJNA897887	SAMN31819193	SRR22359488	Illumina NextSeq 500	Canada	Feces
NCBI_048	b31	NCBI	PRJNA897887	SAMN31819194	SRR22359486	Illumina NextSeq 500	Canada	Feces
NCBI_049	c51	NCBI	PRJEB42631	SAMEA8082429	ERR5310749	Illumina NovaSeq-6000	China	Feces
NCBI_050	c1	NCBI	PRJEB42631	SAMEA8082430	ERR5310750	Illumina NovaSeq-6000	China	Feces
NCBI_051	c52	NCBI	PRJEB42631	SAMEA8082431	ERR5310751	Illumina NovaSeq-6000	China	Feces
NCBI_052	c53	NCBI	PRJEB42631	SAMEA8082432	ERR5310752	Illumina NovaSeq-6000	China	Feces
NCBI_053	c54	NCBI	PRJEB42631	SAMEA8082433	ERR5310753	Illumina NovaSeq-6000	China	Feces
NCBI_054	c55	NCBI	PRJEB42631	SAMEA8082434	ERR5310754	Illumina NovaSeq-6000	China	Feces
NCBI_055	c56	NCBI	PRJEB42631	SAMEA8082435	ERR5310755	Illumina NovaSeq-6000	China	Feces
NCBI_056	c2	NCBI	PRJEB42631	SAMEA8082436	ERR5310756	Illumina NovaSeq-6000	China	Feces
NCBI_057	c57	NCBI	PRJEB42631	SAMEA8082437	ERR5310757	Illumina NovaSeq-6000	China	Feces
NCBI_058	c58	NCBI	PRJEB42631	SAMEA8082438	ERR5310758	Illumina NovaSeq-6000	China	Feces
NCBI_059	c59	NCBI	PRJEB42631	SAMEA8082439	ERR5310759	Illumina NovaSeq-6000	China	Feces
NCBI_060	c60	NCBI	PRJEB42631	SAMEA8082440	ERR5310760	Illumina NovaSeq-6000	China	Feces
NCBI_061	c61	NCBI	PRJEB42631	SAMEA8082441	ERR5310761	Illumina NovaSeq-6000	China	Feces
NCBI_062	c3	NCBI	PRJEB42631	SAMEA8082442	ERR5310762	Illumina NovaSeq-6000	China	Feces
NCBI_063	c62	NCBI	PRJEB42631	SAMEA8082443	ERR5310763	Illumina NovaSeq-6000	China	Feces
NCBI_064	c63	NCBI	PRJEB42631	SAMEA8082444	ERR5310764	Illumina NovaSeq-6000	China	Feces
NCBI_065	c64	NCBI	PRJEB42631	SAMEA8082445	ERR5310765	Illumina NovaSeq-6000	China	Feces
NCBI_066	c4	NCBI	PRJEB42631	SAMEA8082446	ERR5310766	Illumina NovaSeq-6000	China	Feces
NCBI_067	c5	NCBI	PRJEB42631	SAMEA8082447	ERR5310767	Illumina NovaSeq-6000	China	Feces
NCBI_068	c6	NCBI	PRJEB42631	SAMEA8082448	ERR5310768	Illumina NovaSeq-6000	China	Feces
NCBI_069	c65	NCBI	PRJEB42631	SAMEA8082449	ERR5310769	Illumina NovaSeq-6000	China	Feces
NCBI_070	c66	NCBI	PRJEB42631	SAMEA8082450	ERR5310770	Illumina NovaSeq-6000	China	Feces
NCBI_071	c67	NCBI	PRJEB42631	SAMEA8082451	ERR5310771	Illumina NovaSeq-6000	China	Feces
NCBI_072	c7	NCBI	PRJEB42631	SAMEA8082452	ERR5310772	Illumina NovaSeq-6000	China	Feces
NCBI_073	c68	NCBI	PRJEB42631	SAMEA8082453	ERR5310773	Illumina NovaSeq-6000	China	Feces
NCBI_074	c69	NCBI	PRJEB42631	SAMEA8082454	ERR5310774	Illumina NovaSeq-6000	China	Feces
NCBI_075	c8	NCBI	PRJEB42631	SAMEA8082455	ERR5310775	Illumina NovaSeq-6000	China	Feces
NCBI_076	c70	NCBI	PRJEB42631	SAMEA8082456	ERR5310776	Illumina NovaSeq-6000	China	Feces
NCBI_077	c71	NCBI	PRJEB42631	SAMEA8082457	ERR5310777	Illumina NovaSeq-6000	China	Feces
NCBI_078	c72	NCBI	PRJEB42631	SAMEA8082458	ERR5310778	Illumina NovaSeq-6000	China	Feces
NCBI_079	c73	NCBI	PRJEB42631	SAMEA8082459	ERR5310779	Illumina NovaSeq-6000	China	Feces
NCBI_080	c74	NCBI	PRJEB42631	SAMEA8082460	ERR5310780	Illumina NovaSeq-6000	China	Feces
NCBI_081	c75	NCBI	PRJEB42631	SAMEA8082461	ERR5310781	Illumina NovaSeq-6000	China	Feces
NCBI_082	c76	NCBI	PRJEB42631	SAMEA8082462	ERR5310782	Illumina NovaSeq-6000	China	Feces
NCBI_083	c9	NCBI	PRJEB42631	SAMEA8082463	ERR5310783	Illumina NovaSeq-6000	China	Feces
NCBI_084	c77	NCBI	PRJEB42631	SAMEA8082464	ERR5310784	Illumina NovaSeq-6000	China	Feces
NCBI_085	c10	NCBI	PRJEB42631	SAMEA8082465	ERR5310785	Illumina NovaSeq-6000	China	Feces
NCBI_086	c11	NCBI	PRJEB42631	SAMEA8082466	ERR5310786	Illumina NovaSeq-6000	China	Feces
NCBI_087	c12	NCBI	PRJEB42631	SAMEA8082467	ERR5310787	Illumina NovaSeq-6000	China	Feces
NCBI_088	c13	NCBI	PRJEB42631	SAMEA8082468	ERR5310788	Illumina NovaSeq-6000	China	Feces
NCBI_089	c14	NCBI	PRJEB42631	SAMEA8082469	ERR5310789	Illumina NovaSeq-6000	China	Feces
NCBI_090	c78	NCBI	PRJEB42631	SAMEA8082470	ERR5310790	Illumina NovaSeq-6000	China	Feces
NCBI_091	c79	NCBI	PRJEB42631	SAMEA8082471	ERR5310791	Illumina NovaSeq-6000	China	Feces
NCBI_092	c15	NCBI	PRJEB42631	SAMEA8082472	ERR5310792	Illumina NovaSeq-6000	China	Feces
NCBI_093	c80	NCBI	PRJEB42631	SAMEA8082473	ERR5310793	Illumina NovaSeq-6000	China	Feces
NCBI_094	c16	NCBI	PRJEB42631	SAMEA8082474	ERR5310794	Illumina NovaSeq-6000	China	Feces
NCBI_095	c17	NCBI	PRJEB42631	SAMEA8082475	ERR5310795	Illumina NovaSeq-6000	China	Feces
NCBI_096	c18	NCBI	PRJEB42631	SAMEA8082476	ERR5310796	Illumina NovaSeq-6000	China	Feces
NCBI_097	c19	NCBI	PRJEB42631	SAMEA8082477	ERR5310797	Illumina NovaSeq-6000	China	Feces
NCBI_098	c20	NCBI	PRJEB42631	SAMEA8082478	ERR5310798	Illumina NovaSeq-6000	China	Feces
NCBI_099	c81	NCBI	PRJEB42631	SAMEA8082479	ERR5310799	Illumina NovaSeq-6000	China	Feces
NCBI_100	c82	NCBI	PRJEB42631	SAMEA8082480	ERR5310800	Illumina NovaSeq-6000	China	Feces
NCBI_101	c21	NCBI	PRJEB42631	SAMEA8082481	ERR5310801	Illumina NovaSeq-6000	China	Feces
NCBI_102	c22	NCBI	PRJEB42631	SAMEA8082482	ERR5310802	Illumina NovaSeq-6000	China	Feces
NCBI_103	c23	NCBI	PRJEB42631	SAMEA8082483	ERR5310803	Illumina NovaSeq-6000	China	Feces
NCBI_104	c24	NCBI	PRJEB42631	SAMEA8082484	ERR5310804	Illumina NovaSeq-6000	China	Feces
NCBI_105	c83	NCBI	PRJEB42631	SAMEA8082485	ERR5310805	Illumina NovaSeq-6000	China	Feces
NCBI_106	c84	NCBI	PRJEB42631	SAMEA8082486	ERR5310806	Illumina NovaSeq-6000	China	Feces
NCBI_107	c85	NCBI	PRJEB42631	SAMEA8082487	ERR5310807	Illumina NovaSeq-6000	China	Feces
NCBI_108	c25	NCBI	PRJEB42631	SAMEA8082488	ERR5310808	Illumina NovaSeq-6000	China	Feces
NCBI_109	c26	NCBI	PRJEB42631	SAMEA8082489	ERR5310809	Illumina NovaSeq-6000	China	Feces
NCBI_110	c27	NCBI	PRJEB42631	SAMEA8082490	ERR5310810	Illumina NovaSeq-6000	China	Feces
NCBI_111	c28	NCBI	PRJEB42631	SAMEA8082491	ERR5310811	Illumina NovaSeq-6000	China	Feces
NCBI_112	c86	NCBI	PRJEB42631	SAMEA8082492	ERR5310812	Illumina NovaSeq-6000	China	Feces
NCBI_113	c29	NCBI	PRJEB42631	SAMEA8082493	ERR5310813	Illumina NovaSeq-6000	China	Feces
NCBI_114	c30	NCBI	PRJEB42631	SAMEA8082494	ERR5310814	Illumina NovaSeq-6000	China	Feces
NCBI_115	c31	NCBI	PRJEB42631	SAMEA8082495	ERR5310815	Illumina NovaSeq-6000	China	Feces
NCBI_116	c32	NCBI	PRJEB42631	SAMEA8082496	ERR5310816	Illumina NovaSeq-6000	China	Feces
NCBI_117	c87	NCBI	PRJEB42631	SAMEA8082497	ERR5310817	Illumina NovaSeq-6000	China	Feces
NCBI_118	c33	NCBI	PRJEB42631	SAMEA8082498	ERR5310818	Illumina NovaSeq-6000	China	Feces
NCBI_119	c88	NCBI	PRJEB42631	SAMEA8082499	ERR5310819	Illumina NovaSeq-6000	China	Feces
NCBI_120	c89	NCBI	PRJEB42631	SAMEA8082500	ERR5310820	Illumina NovaSeq-6000	China	Feces
NCBI_121	c90	NCBI	PRJEB42631	SAMEA8082501	ERR5310821	Illumina NovaSeq-6000	China	Feces
NCBI_122	c34	NCBI	PRJEB42631	SAMEA8082502	ERR5310822	Illumina NovaSeq-6000	China	Feces
NCBI_123	c35	NCBI	PRJEB42631	SAMEA8082503	ERR5310823	Illumina NovaSeq-6000	China	Feces
NCBI_124	c91	NCBI	PRJEB42631	SAMEA8082504	ERR5310824	Illumina NovaSeq-6000	China	Feces
NCBI_125	c36	NCBI	PRJEB42631	SAMEA8082505	ERR5310825	Illumina NovaSeq-6000	China	Feces
NCBI_126	c37	NCBI	PRJEB42631	SAMEA8082506	ERR5310826	Illumina NovaSeq-6000	China	Feces
NCBI_127	c92	NCBI	PRJEB42631	SAMEA8082507	ERR5310827	Illumina NovaSeq-6000	China	Feces
NCBI_128	c93	NCBI	PRJEB42631	SAMEA8082508	ERR5310828	Illumina NovaSeq-6000	China	Feces
NCBI_129	c94	NCBI	PRJEB42631	SAMEA8082509	ERR5310829	Illumina NovaSeq-6000	China	Feces
NCBI_130	c95	NCBI	PRJEB42631	SAMEA8082510	ERR5310830	Illumina NovaSeq-6000	China	Feces
NCBI_131	c96	NCBI	PRJEB42631	SAMEA8082511	ERR5310831	Illumina NovaSeq-6000	China	Feces
NCBI_132	c97	NCBI	PRJEB42631	SAMEA8082512	ERR5310832	Illumina NovaSeq-6000	China	Feces
NCBI_133	c98	NCBI	PRJEB42631	SAMEA8082513	ERR5310833	Illumina NovaSeq-6000	China	Feces
NCBI_134	c99	NCBI	PRJEB42631	SAMEA8082514	ERR5310834	Illumina NovaSeq-6000	China	Feces
NCBI_135	c100	NCBI	PRJEB42631	SAMEA8082515	ERR5310835	Illumina NovaSeq-6000	China	Feces
NCBI_136	c38	NCBI	PRJEB42631	SAMEA8082516	ERR5310836	Illumina NovaSeq-6000	China	Feces
NCBI_137	c39	NCBI	PRJEB42631	SAMEA8082517	ERR5310837	Illumina NovaSeq-6000	China	Feces
NCBI_138	c101	NCBI	PRJEB42631	SAMEA8082518	ERR5310838	Illumina NovaSeq-6000	China	Feces
NCBI_139	c40	NCBI	PRJEB42631	SAMEA8082519	ERR5310839	Illumina NovaSeq-6000	China	Feces
NCBI_140	c102	NCBI	PRJEB42631	SAMEA8082520	ERR5310840	Illumina NovaSeq-6000	China	Feces
NCBI_141	c41	NCBI	PRJEB42631	SAMEA8082521	ERR5310841	Illumina NovaSeq-6000	China	Feces
NCBI_142	c103	NCBI	PRJEB42631	SAMEA8082522	ERR5310842	Illumina NovaSeq-6000	China	Feces
NCBI_143	c42	NCBI	PRJEB42631	SAMEA8082523	ERR5310843	Illumina NovaSeq-6000	China	Feces
NCBI_144	c43	NCBI	PRJEB42631	SAMEA8082524	ERR5310844	Illumina NovaSeq-6000	China	Feces
NCBI_145	c44	NCBI	PRJEB42631	SAMEA8082525	ERR5310845	Illumina NovaSeq-6000	China	Feces
NCBI_146	c45	NCBI	PRJEB42631	SAMEA8082526	ERR5310846	Illumina NovaSeq-6000	China	Feces
NCBI_147	c104	NCBI	PRJEB42631	SAMEA8082527	ERR5310847	Illumina NovaSeq-6000	China	Feces
NCBI_148	c46	NCBI	PRJEB42631	SAMEA8082528	ERR5310848	Illumina NovaSeq-6000	China	Feces
NCBI_149	c47	NCBI	PRJEB42631	SAMEA8082529	ERR5310849	Illumina NovaSeq-6000	China	Feces
NCBI_150	c105	NCBI	PRJEB42631	SAMEA8082530	ERR5310850	Illumina NovaSeq-6000	China	Feces
NCBI_151	c106	NCBI	PRJEB42631	SAMEA8082531	ERR5310851	Illumina NovaSeq-6000	China	Feces
NCBI_152	c48	NCBI	PRJEB42631	SAMEA8082532	ERR5310852	Illumina NovaSeq-6000	China	Feces
NCBI_153	c49	NCBI	PRJEB42631	SAMEA8082533	ERR5310853	Illumina NovaSeq-6000	China	Feces
NCBI_154	c50	NCBI	PRJEB42631	SAMEA8082534	ERR5310854	Illumina NovaSeq-6000	China	Feces
NCBI_155	c107	NCBI	PRJEB42631	SAMEA8082535	ERR5310855	Illumina NovaSeq-6000	China	Feces
NCBI_156	c108	NCBI	PRJEB42631	SAMEA8082536	ERR5310856	Illumina NovaSeq-6000	China	Feces
NCBI_157	c109	NCBI	PRJEB42631	SAMEA8082537	ERR5310857	Illumina NovaSeq-6000	China	Feces
NCBI_158	c110	NCBI	PRJEB42631	SAMEA8082538	ERR5310858	Illumina NovaSeq-6000	China	Feces
NCBI_159	d7	NCBI	PRJNA322715	SAMN05172935	SRR3588527	Illumina	China	Rumen
NCBI_160	d8	NCBI	PRJNA322715	SAMN05172936	SRR3588546	Illumina	China	Rumen
NCBI_161	d1	NCBI	PRJNA322715	SAMN05172937	SRR3588547	Illumina	China	Rumen
NCBI_162	d2	NCBI	PRJNA322715	SAMN05172938	SRR3588548	Illumina	China	Rumen
NCBI_163	d9	NCBI	PRJNA322715	SAMN05172939	SRR3588549	Illumina	China	Rumen
NCBI_164	d3	NCBI	PRJNA322715	SAMN05172940	SRR3588550	Illumina	China	Rumen
NCBI_165	d4	NCBI	PRJNA322715	SAMN05172941	SRR3588551	Illumina	China	Rumen
NCBI_166	d5	NCBI	PRJNA322715	SAMN05172942	SRR3588552	Illumina	China	Rumen
NCBI_167	d6	NCBI	PRJNA322715	SAMN05172934	SRR3588394	Illumina	China	Rumen
NCBI_168	g1	NCBI	PRJNA645414	SAMN15503816	SRR12217750	Illumina	USA	Feces
NCBI_169	g2	NCBI	PRJNA645414	SAMN15503817	SRR12217749	Illumina	USA	Feces
NCBI_170	g3	NCBI	PRJNA645414	SAMN15503818	SRR12217738	Illumina	USA	Feces
NCBI_171	g4	NCBI	PRJNA645414	SAMN15503819	SRR12217733	Illumina	USA	Feces
NCBI_172	g5	NCBI	PRJNA645414	SAMN15503820	SRR12217732	Illumina	USA	Feces
NCBI_173	g6	NCBI	PRJNA645414	SAMN15503821	SRR12217731	Illumina	USA	Feces
NCBI_174	g7	NCBI	PRJNA645414	SAMN15503822	SRR12217730	Illumina	USA	Feces
NCBI_175	g8	NCBI	PRJNA645414	SAMN15503823	SRR12217729	Illumina	USA	Feces
NCBI_176	g9	NCBI	PRJNA645414	SAMN15503824	SRR12217728	Illumina	USA	Feces
NCBI_177	g10	NCBI	PRJNA645414	SAMN15503825	SRR12217727	Illumina	USA	Feces
NCBI_178	g11	NCBI	PRJNA645414	SAMN15503826	SRR12217748	Illumina	USA	Feces
NCBI_179	g12	NCBI	PRJNA645414	SAMN15503827	SRR12217747	Illumina	USA	Feces
NCBI_180	g13	NCBI	PRJNA645414	SAMN15503828	SRR12217746	Illumina	USA	Feces
NCBI_181	g14	NCBI	PRJNA645414	SAMN15503829	SRR12217745	Illumina	USA	Feces
NCBI_182	g15	NCBI	PRJNA645414	SAMN15503830	SRR12217744	Illumina	USA	Feces
NCBI_183	g16	NCBI	PRJNA645414	SAMN15503831	SRR12217743	Illumina	USA	Feces
NCBI_184	g17	NCBI	PRJNA645414	SAMN15503832	SRR12217742	Illumina	USA	Feces
NCBI_185	g18	NCBI	PRJNA645414	SAMN15503833	SRR12217741	Illumina	USA	Feces
NCBI_186	g19	NCBI	PRJNA645414	SAMN15503834	SRR12217740	Illumina	USA	Feces
NCBI_187	g20	NCBI	PRJNA645414	SAMN15503835	SRR12217739	Illumina	USA	Feces
NCBI_188	g21	NCBI	PRJNA645414	SAMN15503836	SRR12217737	Illumina	USA	Feces
NCBI_189	g22	NCBI	PRJNA645414	SAMN15503837	SRR12217736	Illumina	USA	Feces
NCBI_190	g23	NCBI	PRJNA645414	SAMN15503838	SRR12217735	Illumina	USA	Feces
NCBI_191	g24	NCBI	PRJNA645414	SAMN15503839	SRR12217734	Illumina	USA	Feces
NCBI_192	i1	NCBI	PRJNA438833	SAMN08738624	SRR6869079	Illumina HiSeq 4000	USA	Feces
NCBI_193	i2	NCBI	PRJNA438833	SAMN08738625	SRR6869080	Illumina HiSeq 4000	USA	Feces
NCBI_194	i3	NCBI	PRJNA438833	SAMN08738626	SRR6869081	Illumina HiSeq 4000	USA	Feces
NCBI_195	i4	NCBI	PRJNA438833	SAMN08738627	SRR6869082	Illumina HiSeq 4000	USA	Feces
NCBI_196	i5	NCBI	PRJNA438833	SAMN08738620	SRR6869083	Illumina HiSeq 4000	USA	Feces
NCBI_197	i6	NCBI	PRJNA438833	SAMN08738621	SRR6869084	Illumina HiSeq 4000	USA	Feces
NCBI_198	i7	NCBI	PRJNA438833	SAMN08738622	SRR6869085	Illumina HiSeq 4000	USA	Feces
NCBI_199	i8	NCBI	PRJNA438833	SAMN08738623	SRR6869086	Illumina HiSeq 4000	USA	Feces
NCBI_200	i9	NCBI	PRJNA438833	SAMN08738628	SRR6869087	Illumina HiSeq 4000	USA	Feces
NCBI_201	i10	NCBI	PRJNA438833	SAMN08738629	SRR6869088	Illumina HiSeq 4000	USA	Feces
NCBI_202	i11	NCBI	PRJNA438833	SAMN08738630	SRR6869089	Illumina HiSeq 4000	USA	Feces
NCBI_203	i12	NCBI	PRJNA438833	SAMN08738631	SRR6869090	Illumina HiSeq 4000	USA	Feces
NCBI_204	i13	NCBI	PRJNA438833	SAMN08738632	SRR6869091	Illumina HiSeq 4000	USA	Feces
NCBI_205	i14	NCBI	PRJNA438833	SAMN08738633	SRR6869092	Illumina HiSeq 4000	USA	Feces
NCBI_206	i15	NCBI	PRJNA438833	SAMN08738634	SRR6869093	Illumina HiSeq 4000	USA	Feces
NCBI_207	i16	NCBI	PRJNA438833	SAMN08738635	SRR6869094	Illumina HiSeq 4000	USA	Feces
MGRAST_01	h5	MGRAST	mgp82820	mgl625454	mgm4770304.3	Illumina HiSeq 4000	Canada	Ileum
MGRAST_02	h19	MGRAST	mgp82820	mgl625496	mgm4770303.3	Illumina HiSeq 4000	Canada	Ileum
MGRAST_03	h1	MGRAST	mgp82820	mgl625442	mgm4770302.3	Illumina HiSeq 4000	Canada	Ileum
MGRAST_04	h21	MGRAST	mgp82820	mgl625502	mgm4770301.3	Illumina HiSeq 4000	Canada	Ileum
MGRAST_05	h18	MGRAST	mgp82820	mgl625493	mgm4770300.3	Illumina HiSeq 4000	Canada	Ileum
MGRAST_06	h10	MGRAST	mgp82820	mgl625469	mgm4770299.3	Illumina HiSeq 4000	Canada	Ileum
MGRAST_07	h7	MGRAST	mgp82820	mgl625460	mgm4770298.3	Illumina HiSeq 4000	Canada	Ileum
MGRAST_08	h2	MGRAST	mgp82820	mgl625445	mgm4770297.3	Illumina HiSeq 4000	Canada	Ileum
MGRAST_09	h6	MGRAST	mgp82820	mgl625457	mgm4770296.3	Illumina HiSeq 4000	Canada	Ileum
MGRAST_10	h9	MGRAST	mgp82820	mgl625466	mgm4770295.3	Illumina HiSeq 4000	Canada	Ileum
MGRAST_11	h8	MGRAST	mgp82820	mgl625463	mgm4770294.3	Illumina HiSeq 4000	Canada	Ileum
MGRAST_12	h12	MGRAST	mgp82820	mgl625475	mgm4770293.3	Illumina HiSeq 4000	Canada	Ileum
MGRAST_13	h3	MGRAST	mgp82820	mgl625448	mgm4770292.3	Illumina HiSeq 4000	Canada	Ileum
MGRAST_14	h20	MGRAST	mgp82820	mgl625499	mgm4770291.3	Illumina HiSeq 4000	Canada	Ileum
MGRAST_15	h15	MGRAST	mgp82820	mgl625484	mgm4770290.3	Illumina HiSeq 4000	Canada	Ileum
MGRAST_16	h17	MGRAST	mgp82820	mgl625490	mgm4770289.3	Illumina HiSeq 4000	Canada	Ileum
MGRAST_17	h13	MGRAST	mgp82820	mgl625478	mgm4770288.3	Illumina HiSeq 4000	Canada	Ileum
MGRAST_18	h16	MGRAST	mgp82820	mgl625487	mgm4770287.3	Illumina HiSeq 4000	Canada	Ileum
MGRAST_19	h4	MGRAST	mgp82820	mgl625451	mgm4770286.3	Illumina HiSeq 4000	Canada	Ileum
MGRAST_20	h11	MGRAST	mgp82820	mgl625472	mgm4770285.3	Illumina HiSeq 4000	Canada	Ileum
MGRAST_21	h14	MGRAST	mgp82820	mgl625481	mgm4770284.3	Illumina HiSeq 4000	Canada	Ileum
MGRAST_22	h22	MGRAST	mgp82820	mgl625505	mgm4770283.3	Illumina HiSeq 4000	Canada	Ileum
MGRAST_23	e24	MGRAST	mgp82806	mgl625310	mgm4770185.3	Illumina HiSeq 4000	Canada	Ileum
MGRAST_24	e23	MGRAST	mgp82806	mgl625337	mgm4770184.3	Illumina HiSeq 4000	Canada	Ileum
MGRAST_25	e22	MGRAST	mgp82806	mgl625331	mgm4770182.3	Illumina HiSeq 4000	Canada	Ileum
MGRAST_26	e21	MGRAST	mgp82806	mgl625343	mgm4770181.3	Illumina HiSeq 4000	Canada	Ileum
MGRAST_27	e20	MGRAST	mgp82806	mgl625340	mgm4770180.3	Illumina HiSeq 4000	Canada	Ileum
MGRAST_28	e19	MGRAST	mgp82806	mgl625289	mgm4770179.3	Illumina HiSeq 4000	Canada	Ileum
MGRAST_29	e18	MGRAST	mgp82806	mgl625274	mgm4770178.3	Illumina HiSeq 4000	Canada	Ileum
MGRAST_30	e17	MGRAST	mgp82806	mgl625349	mgm4770177.3	Illumina HiSeq 4000	Canada	Ileum
MGRAST_31	e16	MGRAST	mgp82806	mgl625277	mgm4770176.3	Illumina HiSeq 4000	Canada	Ileum
MGRAST_32	e15	MGRAST	mgp82806	mgl625295	mgm4770175.3	Illumina HiSeq 4000	Canada	Ileum
MGRAST_33	e14	MGRAST	mgp82806	mgl625322	mgm4770174.3	Illumina HiSeq 4000	Canada	Ileum
MGRAST_34	e13	MGRAST	mgp82806	mgl625316	mgm4770173.3	Illumina HiSeq 4000	Canada	Ileum
MGRAST_35	e12	MGRAST	mgp82806	mgl625283	mgm4770172.3	Illumina HiSeq 4000	Canada	Ileum
MGRAST_36	e11	MGRAST	mgp82806	mgl625328	mgm4770171.3	Illumina HiSeq 4000	Canada	Ileum
MGRAST_37	e10	MGRAST	mgp82806	mgl625298	mgm4770170.3	Illumina HiSeq 4000	Canada	Ileum
MGRAST_38	e9	MGRAST	mgp82806	mgl625319	mgm4770169.3	Illumina HiSeq 4000	Canada	Ileum
MGRAST_39	e8	MGRAST	mgp82806	mgl625292	mgm4770168.3	Illumina HiSeq 4000	Canada	Ileum
MGRAST_40	e7	MGRAST	mgp82806	mgl625313	mgm4770167.3	Illumina HiSeq 4000	Canada	Ileum
MGRAST_41	e6	MGRAST	mgp82806	mgl625280	mgm4770166.3	Illumina HiSeq 4000	Canada	Ileum
MGRAST_42	e5	MGRAST	mgp82806	mgl625304	mgm4770165.3	Illumina HiSeq 4000	Canada	Ileum
MGRAST_43	e4	MGRAST	mgp82806	mgl625301	mgm4770164.3	Illumina HiSeq 4000	Canada	Ileum
MGRAST_44	e3	MGRAST	mgp82806	mgl625325	mgm4770163.3	Illumina HiSeq 4000	Canada	Ileum
MGRAST_45	e2	MGRAST	mgp82806	mgl625286	mgm4770162.3	Illumina HiSeq 4000	Canada	Ileum
MGRAST_46	e1	MGRAST	mgp82806	mgl625346	mgm4770160.3	Illumina HiSeq 4000	Canada	Ileum
MGRAST_47	f36	MGRAST	mgp20043	mgl529729	mgm4718787.3	Illumina 2500	USA	Feces
MGRAST_48	f35	MGRAST	mgp20043	mgl529744	mgm4718786.3	Illumina 2500	USA	Feces
MGRAST_49	f34	MGRAST	mgp20043	mgl529801	mgm4718785.3	Illumina 2500	USA	Feces
MGRAST_50	f33	MGRAST	mgp20043	mgl529819	mgm4718784.3	Illumina 2500	USA	Feces
MGRAST_51	f32	MGRAST	mgp20043	mgl529780	mgm4718783.3	Illumina 2500	USA	Feces
MGRAST_52	f31	MGRAST	mgp20043	mgl529804	mgm4718782.3	Illumina 2500	USA	Feces
MGRAST_53	f30	MGRAST	mgp20043	mgl529774	mgm4718781.3	Illumina 2500	USA	Feces
MGRAST_54	f29	MGRAST	mgp20043	mgl529783	mgm4718780.3	Illumina 2500	USA	Feces
MGRAST_55	f28	MGRAST	mgp20043	mgl529759	mgm4718779.3	Illumina 2500	USA	Feces
MGRAST_56	f27	MGRAST	mgp20043	mgl529750	mgm4718778.3	Illumina 2500	USA	Feces
MGRAST_57	f26	MGRAST	mgp20043	mgl529768	mgm4718777.3	Illumina 2500	USA	Feces
MGRAST_58	f25	MGRAST	mgp20043	mgl529822	mgm4718776.3	Illumina 2500	USA	Feces
MGRAST_59	f24	MGRAST	mgp20043	mgl529735	mgm4718775.3	Illumina 2500	USA	Feces
MGRAST_60	f23	MGRAST	mgp20043	mgl529777	mgm4718774.3	Illumina 2500	USA	Feces
MGRAST_61	f22	MGRAST	mgp20043	mgl529792	mgm4718773.3	Illumina 2500	USA	Feces
MGRAST_62	f21	MGRAST	mgp20043	mgl529807	mgm4718772.3	Illumina 2500	USA	Feces
MGRAST_63	f20	MGRAST	mgp20043	mgl529762	mgm4718771.3	Illumina 2500	USA	Feces
MGRAST_64	f19	MGRAST	mgp20043	mgl529825	mgm4718770.3	Illumina 2500	USA	Feces
MGRAST_65	f18	MGRAST	mgp20043	mgl529756	mgm4718769.3	Illumina 2500	USA	Feces
MGRAST_66	f17	MGRAST	mgp20043	mgl529741	mgm4718768.3	Illumina 2500	USA	Feces
MGRAST_67	f16	MGRAST	mgp20043	mgl529726	mgm4718767.3	Illumina 2500	USA	Feces
MGRAST_68	f15	MGRAST	mgp20043	mgl529765	mgm4718766.3	Illumina 2500	USA	Feces
MGRAST_69	f14	MGRAST	mgp20043	mgl529771	mgm4718765.3	Illumina 2500	USA	Feces
MGRAST_70	f13	MGRAST	mgp20043	mgl529786	mgm4718764.3	Illumina 2500	USA	Feces
MGRAST_71	f12	MGRAST	mgp20043	mgl529753	mgm4718763.3	Illumina 2500	USA	Feces
MGRAST_72	f11	MGRAST	mgp20043	mgl529798	mgm4718762.3	Illumina 2500	USA	Feces
MGRAST_73	f10	MGRAST	mgp20043	mgl529813	mgm4718761.3	Illumina 2500	USA	Feces
MGRAST_74	f9	MGRAST	mgp20043	mgl529732	mgm4718760.3	Illumina 2500	USA	Feces
MGRAST_75	f8	MGRAST	mgp20043	mgl529816	mgm4718759.3	Illumina 2500	USA	Feces
MGRAST_76	f7	MGRAST	mgp20043	mgl529810	mgm4718758.3	Illumina 2500	USA	Feces
MGRAST_77	f6	MGRAST	mgp20043	mgl529795	mgm4718757.3	Illumina 2500	USA	Feces
MGRAST_78	f5	MGRAST	mgp20043	mgl529738	mgm4718756.3	Illumina 2500	USA	Feces
MGRAST_79	f4	MGRAST	mgp20043	mgl529747	mgm4718755.3	Illumina 2500	USA	Feces
MGRAST_80	f3	MGRAST	mgp20043	mgl529720	mgm4718754.3	Illumina 2500	USA	Feces
MGRAST_81	f2	MGRAST	mgp20043	mgl529789	mgm4718753.3	Illumina 2500	USA	Feces
MGRAST_82	f1	MGRAST	mgp20043	mgl529723	mgm4718752.3	Illumina 2500	USA	Feces
