# Supplementary material for: Nutritional gradients orchestrate spatiotemporal microbial assembly and adaptive evolution in the neonatal mammalian gut
Source: Research Square preprint supplement (doi:10.21203/rs.3.rs-7903532/v1), 2026-02-04
Supplement: Supplementary file 5 [file 52faa5e769eae90ef2103bf1.xlsx]

## Sheet: Supplementary Table S5
CAZy entries associated with metabolic substrates
Substrates	CAZy entries
Milk components	GH1, GH3, GH31, GH97, GH4, GH38, GH2, GH42, GH35, GH27, GH33, GH20, GH29
Cellulose	AA10, AA15, AA16, AA3, AA9, CBM10, CBM17, CBM28, CBM30, CBM46, CBM49, CBM63, CBM64, CBM8, CBM9, GH1, GH12, GH124, GH26, GH3, GH39, GH44, GH45, GH48, GH5, GH6, GH7, GH74, GH8, GH9, GH94
Hemicellulose	GH121, GH67, GH62, GH127, GH130, GH1, GH2, GH8, GH54, GH39, GH3, GH120, GH52, GH43, GH10, GH115, GH51, GH30, GH31, GH11, GH116, GH16, GH26, GH141, GH3, CE1, CE2, CE4, CE6, CE7, GH47
