# Supplementary material for: Nutritional gradients orchestrate spatiotemporal microbial assembly and adaptive evolution in the neonatal mammalian gut
Source: Research Square preprint supplement (doi:10.21203/rs.3.rs-7903532/v1), 2026-02-04
Supplement: Supplementary file 6 [file 64ae9a24f33f2c4a2e681e53.xlsx]

## Sheet: Supplementary table S3
Quality and taxonomic information of representative sequences from closed genomes
ID	Completeness	Contamination	Size	Type	Mapping status to ACGG	Mapping status to RefSeq	Kingdom	Phylum	Class	Order	Family	Genus	Species	MAGs (n)
Calf_MAG_03801	99.22	0.78	2177756	directly_assembled and isolated	yes	yes	Bacteria	Bacillota	Bacilli	Lactobacillales	Lactobacillaceae	Lactobacillus	Lactobacillus johnsonii	11
gao03	99.85	1.44	2115713	isolated	yes	yes	Bacteria	Actinomycetota	Actinomycetia	Actinomycetales	Bifidobacteriaceae	Bifidobacterium	Bifidobacterium adolescentis	1
gao04	100	0.45	2148950	isolated	yes	yes	Bacteria	Actinomycetota	Actinomycetia	Actinomycetales	Bifidobacteriaceae	Bifidobacterium	Bifidobacterium boum	1
gao18	100	0.46	2431349	isolated	yes	yes	Bacteria	Actinomycetota	Actinomycetia	Actinomycetales	Bifidobacteriaceae	Bifidobacterium	Bifidobacterium longum	1
ISO_1599	98.66	0.59	4988435	isolated	no	yes	Bacteria	Bacteroidota	Bacteroidia	Bacteroidales	Marinifilaceae	Butyricimonas	Butyricimonas virosa	1
ISO_1676_gtdb	94.08	2.24	5025168	isolated	no	yes	Bacteria	Bacillota_A	Clostridia	Lachnospirales	Lachnospiraceae	Enterocloster	Enterocloster aldenensis	1
ISO_1511_16s	95.55	1.1	3216279	isolated	yes	yes	Bacteria	Bacillota_A	Clostridia	Lachnospirales	Lachnospiraceae	Enterocloster	Enterocloster clostridioformis	1
ISO_0004_gtdb	99.63	0.01	2792201	isolated	yes	yes	Bacteria	Bacillota	Bacilli	Lactobacillales	Enterococcaceae	Enterococcus	Enterococcus faecalis	2
ISO_0095_gtdb	99.63	1.69	3074897	isolated	no	yes	Bacteria	Bacillota	Bacilli	Lactobacillales	Enterococcaceae	Enterococcus_B	Enterococcus_B durans	2
ISO_0218_gtdb	99.63	0	2571025	isolated	yes	yes	Bacteria	Bacillota	Bacilli	Lactobacillales	Enterococcaceae	Enterococcus_B	Enterococcus_B faecium	3
ISO_1459_gtdb	99.62	0	2799692	isolated	no	yes	Bacteria	Bacillota	Bacilli	Lactobacillales	Enterococcaceae	Enterococcus_B	Enterococcus_B lactis	10
ISO_0091	98.16	10.41	3570208	isolated	yes	yes	Bacteria	Bacillota	Bacilli	Lactobacillales	Enterococcaceae	Enterococcus_D	Enterococcus_D gallinarum	1
ISO_0094_gtdb	99.17	0.99	2331158	isolated	yes	yes	Bacteria	Bacillota	Bacilli	Lactobacillales	Enterococcaceae	Enterococcus_E	Enterococcus_E cecorum	1
ISO_1614_gtdb	99.4	0.44	5176994	isolated	yes	yes	Bacteria	Pseudomonadota	Gammaproteobacteria	Enterobacterales	Enterobacteriaceae	Escherichia	Escherichia coli	1
ISO_0354	99.46	3.54	3192585	isolated	no	yes	Bacteria	Bacillota	Bacilli	Lactobacillales	Lactobacillaceae	Lacticaseibacillus	Lacticaseibacillus paracasei	2
ISO_0379	99.38	5.35	3301616	isolated	yes	yes	Bacteria	Bacillota	Bacilli	Lactobacillales	Lactobacillaceae	Lactiplantibacillus	Lactiplantibacillus plantarum	3
ISO_0072	99.03	0.62	2080145	isolated	no	yes	Bacteria	Bacillota	Bacilli	Lactobacillales	Lactobacillaceae	Lactobacillus	Lactobacillus delbrueckii	2
ISO_1337_gtdb	83.59	1.48	1832429	isolated	no	yes	Bacteria	Bacillota	Bacilli	Lactobacillales	Streptococcaceae	Lactococcus	Lactococcus formosensis	1
ISO_1176_16s	98.28	8.31	2273268	isolated	no	yes	Bacteria	Bacillota	Bacilli	Lactobacillales	Lactobacillaceae	Ligilactobacillus	Ligilactobacillus murinus	2
ISO_0319	99.48	0	1885500	isolated	yes	yes	Bacteria	Bacillota	Bacilli	Lactobacillales	Lactobacillaceae	Ligilactobacillus	Ligilactobacillus salivarius	2
ISO_1613	99.18	3.94	1923715	isolated	no	yes	Bacteria	Bacillota	Bacilli	Lactobacillales	Lactobacillaceae	Limosilactobacillus	Limosilactobacillus fermentum	1
L-725_500	99.45	0	1909655	isolated	yes	yes	Bacteria	Bacillota	Bacilli	Lactobacillales	Lactobacillaceae	Limosilactobacillus	Limosilactobacillus reuteri	43
ISO_1494_16s	99.3	0.7	3345646	isolated	no	yes	Bacteria	Bacillota_A	Clostridia	Peptostreptococcales	Peptostreptococcaceae	Paraclostridium	Paraclostridium dentum	2
ISO_1334	99.38	0.6	1793955	isolated	no	yes	Bacteria	Bacillota	Bacilli	Lactobacillales	Lactobacillaceae	Pediococcus	Pediococcus pentosaceus	1
Y15	98.99	0.84	3467704	isolated	no	no	Bacteria	Bacteroidota	Bacteroidia	Bacteroidales	Bacteroidaceae	Prevotella	Prevotella sp002481295	2
Y4	96.75	0.84	3463708	isolated	no	no	Bacteria	Bacteroidota	Bacteroidia	Bacteroidales	Bacteroidaceae	Prevotella	Prevotella sp900546345	2
gao15	100	0	2094033	isolated	yes	yes	Bacteria	Actinomycetota	Actinomycetia	Actinomycetales	Bifidobacteriaceae	Pseudoscardovia	Pseudoscardovia suis	1
ISO_1482_16s	100	0	3246942	isolated	yes	yes	Bacteria	Bacillota_A	Clostridia	Clostridiales	Clostridiaceae	Sarcina	Sarcina perfringens	1
ISO_0080_gtdb	99.38	1	2263565	isolated	no	yes	Bacteria	Bacillota	Bacilli	Staphylococcales	Staphylococcaceae	Staphylococcus	Staphylococcus hominis	1
ISO_0074_gtdb	97.5	1.81	2613680	isolated	no	yes	Bacteria	Bacillota	Bacilli	Staphylococcales	Staphylococcaceae	Staphylococcus	Staphylococcus ureilyticus	1
ISO_1434_gtdb	99.81	0.37	2353065	isolated	yes	yes	Bacteria	Bacillota	Bacilli	Lactobacillales	Streptococcaceae	Streptococcus	Streptococcus gallolyticus	2
ISO_1457	100	6.88	1964153	isolated	yes	yes	Bacteria	Bacillota	Bacilli	Lactobacillales	Streptococcaceae	Streptococcus	Streptococcus lutetiensis	1
FIX_104	97.18	0	1506116	fix_to_complete	no	no	Archaea	Thermoplasmatota	Thermoplasmata	Methanomassiliicoccales	Methanomethylophilaceae	Methanarcanum	Methanarcanum hacksteinii	5
FIX_090	98.32	0	1990899	fix_to_complete	no	no	Bacteria	Actinomycetota	Actinomycetia	Actinomycetales	Actinomycetaceae	RUG11864	unclassified	2
Calf_MAG_04894	100	0.42	2049567	directly_assembled	no	yes	Bacteria	Actinomycetota	Actinomycetia	Actinomycetales	Actinomycetaceae	RUG11864	unclassified	2
Calf_MAG_05236	100	1.15	3181511	directly_assembled	no	yes	Bacteria	Spirochaetota	Spirochaetia	Sphaerochaetales	Sphaerochaetaceae	Spiro-02	Spiro-02 sp001604275	2
Calf_MAG_03734	99.3	0.52	1874080	directly_assembled	no	yes	Bacteria	Bacillota	Bacilli	Lactobacillales	Lactobacillaceae	Ligilactobacillus	Ligilactobacillus animalis	3
FIX_050	93.95	0	1743333	fix_to_complete	no	no	Bacteria	Bacillota_A	Clostridia	Christensenellales	CAG-314	CAG-314	CAG-314 sp900551395	1
Calf_MAG_14824	76.45	0	909654	directly_assembled	no	no	Bacteria	Bacillota_A	Clostridia	Christensenellales	UBA1242	UMGS687	UMGS687 sp900544595	1
FIX_097	62.39	0.85	706265	fix_to_complete	no	no	Bacteria	Patescibacteria	Saccharimonadia	Saccharimonadales	Nanosynbacteraceae	Nanosynbacter	unclassified	3
Calf_MAG_07837	93.95	0	2208563	directly_assembled	yes	no	Bacteria	Bacteroidota	Bacteroidia	Bacteroidales	UBA932	Egerieousia	Egerieousia sp002309115	12
Calf_MAG_07940	100	0	2557851	directly_assembled	no	yes	Bacteria	Synergistota	Synergistia	Synergistales	Dethiosulfovibrionaceae	Pyramidobacter	Pyramidobacter piscolens	4
FIX_039	98.31	0	2735413	fix_to_complete	yes	yes	Bacteria	Synergistota	Synergistia	Synergistales	Dethiosulfovibrionaceae	Pyramidobacter	unclassified	1
FIX_019	88.1	1.9	2487320	fix_to_complete	yes	yes	Bacteria	Bacteroidota	Bacteroidia	Bacteroidales	UBA932	Cryptobacteroides	Cryptobacteroides sp000434935	2
Calf_MAG_11282	97.48	0	2666872	directly_assembled	yes	no	Bacteria	Bacteroidota	Bacteroidia	Bacteroidales	Bacteroidaceae	Alloprevotella	Alloprevotella sp004557035	4
FIX_057	96.62	0	2692284	fix_to_complete	yes	yes	Bacteria	Bacteroidota	Bacteroidia	Bacteroidales	Bacteroidaceae	Alloprevotella	Alloprevotella sp004552155	1
FIX_072	98.87	3.04	4529966	fix_to_complete	no	no	Bacteria	Bacteroidota	Bacteroidia	Bacteroidales	Bacteroidaceae	Prevotella	Prevotella sp002353825	11
Calf_MAG_10957	87.54	0.05	2468157	directly_assembled	yes	no	Bacteria	Bacteroidota	Bacteroidia	Bacteroidales	Bacteroidaceae	Prevotella	Prevotella sp900315635	3
Calf_MAG_09476	62.51	0.18	2848031	directly_assembled	yes	no	Bacteria	Bacteroidota	Bacteroidia	Bacteroidales	Bacteroidaceae	Prevotella	Prevotella sp002480935	1
Calf_MAG_10801	80.07	0.51	2903709	directly_assembled	no	yes	Bacteria	Bacteroidota	Bacteroidia	Bacteroidales	Bacteroidaceae	Prevotella	Prevotella mizrahii	1
Calf_MAG_10501	98.47	0.74	2588601	directly_assembled	yes	yes	Bacteria	Bacteroidota	Bacteroidia	Bacteroidales	Bacteroidaceae	Prevotella	Prevotella sp900314915	4
FIX_011	98.81	0.71	4098908	fix_to_complete	yes	yes	Bacteria	Bacteroidota	Bacteroidia	Bacteroidales	Bacteroidaceae	Prevotella	Prevotella sp900314365	1
FIX_066	98.14	0.37	3115292	fix_to_complete	yes	yes	Bacteria	Bacteroidota	Bacteroidia	Bacteroidales	Bacteroidaceae	Phocaeicola	Phocaeicola sp902779535	1
FIX_079	98.89	0.37	3925426	fix_to_complete	no	no	Bacteria	Bacteroidota	Bacteroidia	Bacteroidales	Bacteroidaceae	Prevotella	unclassified	2
Calf_MAG_10134	99.26	0	3620980	directly_assembled	yes	yes	Bacteria	Bacteroidota	Bacteroidia	Bacteroidales	Bacteroidaceae	Prevotella	Prevotella sp900100635	1
Calf_MAG_10215	99.63	0.74	3987350	directly_assembled	yes	yes	Bacteria	Bacteroidota	Bacteroidia	Bacteroidales	Bacteroidaceae	Prevotella	Prevotella ruminicola	4
FIX_003	99.63	1.48	3383518	fix_to_complete	yes	yes	Bacteria	Bacteroidota	Bacteroidia	Bacteroidales	Bacteroidaceae	Prevotella	Prevotella sp900109055	2
FIX_010	98.33	0.93	4189472	fix_to_complete	yes	no	Bacteria	Bacteroidota	Bacteroidia	Bacteroidales	Bacteroidaceae	Prevotella	Prevotella sp002350805	2
FIX_037	82.59	0.28	3701015	fix_to_complete	yes	no	Bacteria	Bacteroidota	Bacteroidia	Bacteroidales	Bacteroidaceae	Prevotella	Prevotella sp902797505	1
FIX_008	98.52	0.49	3476231	fix_to_complete	yes	yes	Bacteria	Bacteroidota	Bacteroidia	Bacteroidales	Bacteroidaceae	Prevotella	Prevotella sp900314935	2
Calf_MAG_10636	99.29	1.37	3717262	directly_assembled	no	no	Bacteria	Bacteroidota	Bacteroidia	Bacteroidales	Bacteroidaceae	Prevotella	Prevotella sp900556825	3
Calf_MAG_10349	98.89	0.8	4088261	directly_assembled	yes	yes	Bacteria	Bacteroidota	Bacteroidia	Bacteroidales	Bacteroidaceae	Prevotella	Prevotella sp900314655	2
FIX_009	88.89	0.56	3807159	fix_to_complete	yes	no	Bacteria	Bacteroidota	Bacteroidia	Bacteroidales	Bacteroidaceae	Prevotella	Prevotella sp900316985	1
FIX_025	96.34	0.74	2775907	fix_to_complete	yes	yes	Bacteria	Bacteroidota	Bacteroidia	Bacteroidales	Bacteroidaceae	UBA6382	UBA6382 sp017940565	1
Calf_MAG_05857	97.38	1.19	3165469	directly_assembled	yes	yes	Bacteria	Bacteroidota	Bacteroidia	Bacteroidales	UBA932	Cryptobacteroides	Cryptobacteroides sp900316045	2
Calf_MAG_06092	91.98	0.48	1979965	directly_assembled	yes	yes	Bacteria	Bacteroidota	Bacteroidia	Bacteroidales	UBA932	Cryptobacteroides	Cryptobacteroides sp900546445	2
Calf_MAG_05651	94.29	0.95	2811611	directly_assembled	yes	yes	Bacteria	Bacteroidota	Bacteroidia	Bacteroidales	UBA932	Cryptobacteroides	Cryptobacteroides sp900317925	2
Calf_MAG_06367	95.48	0.48	2174155	directly_assembled	yes	no	Bacteria	Bacteroidota	Bacteroidia	Bacteroidales	UBA932	Cryptobacteroides	Cryptobacteroides sp900316675	9
FIX_041	95	0.26	2560862	fix_to_complete	yes	no	Bacteria	Bacteroidota	Bacteroidia	Bacteroidales	UBA932	Cryptobacteroides	Cryptobacteroides sp902803715	1
Calf_MAG_05905	96.49	1.08	3157863	directly_assembled	yes	no	Bacteria	Bacteroidota	Bacteroidia	Bacteroidales	P3	UBA1711	UBA1711 sp900317125	5
Calf_MAG_06980	97.17	0.88	3150877	directly_assembled	yes	yes	Bacteria	Bacteroidota	Bacteroidia	Bacteroidales	Muribaculaceae	Sodaliphilus	Sodaliphilus pleomorphus	7
FIX_067	95.93	0.74	3156289	fix_to_complete	yes	no	Bacteria	Bacteroidota	Bacteroidia	Bacteroidales	Bacteroidaceae	UBA6398	UBA6398 sp900314335	1
Calf_MAG_11598	98.4	0.37	3172045	directly_assembled	no	no	Bacteria	Bacteroidota	Bacteroidia	Bacteroidales	Bacteroidaceae	Prevotella	Prevotella sp022781445	1
Calf_MAG_05023	100	0	3599075	directly_assembled	no	yes	Bacteria	Synergistota	Synergistia	Synergistales	Synergistaceae	Cloacibacillus	Cloacibacillus porcorum	2
Calf_MAG_15817	97.32	0.67	1991870	directly_assembled	yes	yes	Bacteria	Bacillota_A	Clostridia	Oscillospirales	Acutalibacteraceae	Fimenecus	Fimenecus sp934436505	3
FIX_051	77.85	0	1657443	fix_to_complete	no	no	Bacteria	Bacillota_A	Clostridia	Oscillospirales	Acutalibacteraceae	Fimenecus	unclassified	1
Calf_MAG_15839	97.32	0	2189224	directly_assembled	yes	yes	Bacteria	Bacillota_A	Clostridia	Oscillospirales	Acutalibacteraceae	Fimenecus	Fimenecus sp900315985	1
Calf_MAG_02544	98.88	1.12	2654651	directly_assembled	no	yes	Bacteria	Fusobacteriota	Fusobacteriia	Fusobacteriales	Fusobacteriaceae	Fusobacterium_A	Fusobacterium_A sp900543175	1
Calf_MAG_02080	98.11	0.81	2598461	directly_assembled	yes	yes	Bacteria	Bacillota	Bacilli	Erysipelotrichales	Erysipelotrichaceae	Holdemanella	Holdemanella porci	4
Calf_MAG_01912	98.1	1.67	2189290	directly_assembled	yes	yes	Bacteria	Bacillota	Bacilli	Erysipelotrichales	Erysipelotrichaceae	UBA636	UBA636 sp900546285	2
FIX_033	99.06	0.94	2731992	fix_to_complete	yes	yes	Bacteria	Bacillota	Bacilli	Erysipelotrichales	Coprobacillaceae	Sharpea	Sharpea azabuensis	2
FIX_053	97.17	0	2808240	fix_to_complete	no	yes	Bacteria	Bacillota	Bacilli	Erysipelotrichales	Coprobacillaceae	Faecalibacillus	Faecalibacillus intestinalis	1
FIX_089	99.53	1.22	2284239	fix_to_complete	no	yes	Bacteria	Actinomycetota	Actinomycetia	Actinomycetales	Actinomycetaceae	Mobiluncus	unclassified	1
Calf_MAG_03274	93.82	1.28	1368657	directly_assembled	no	no	Bacteria	Bacillota	Bacilli	RF39	UBA660	CAG-417	unclassified	5
Calf_MAG_22319	93.82	1.12	1231056	directly_assembled	no	no	Bacteria	Bacillota	Bacilli	RF39	UBA660	RUG13038	unclassified	1
Calf_MAG_00860	61.89	0	924472	directly_assembled	no	yes	Bacteria	Patescibacteria	Saccharimonadia	Saccharimonadales	Nanosyncoccaceae	Nanosyncoccus	unclassified	6
Calf_MAG_03176	92.7	1.12	1594744	directly_assembled	yes	no	Bacteria	Bacillota	Bacilli	RF39	UBA660	UBA3789	UBA3789 sp900314225	1
Calf_MAG_03422	90.45	2.25	1208528	directly_assembled	yes	yes	Bacteria	Bacillota	Bacilli	RF39	UBA660	CAG-533	CAG-533 sp000434495	1
Calf_MAG_02796	73.59	1.57	1375204	directly_assembled	no	no	Bacteria	Bacillota_A	Clostridia	TANB77	CAG-508	CAG-793	unclassified	1
Calf_MAG_02807	72.92	0.89	1634876	directly_assembled	no	no	Bacteria	Bacillota_A	Clostridia	TANB77	CAG-508	CAG-793	unclassified	1
Calf_MAG_02817	74.43	0	1396133	directly_assembled	no	no	Bacteria	Bacillota_A	Clostridia	TANB77	CAG-508	CAG-269	CAG-269 sp002372935	2
Calf_MAG_03030	55.1	1.12	1339703	directly_assembled	yes	no	Bacteria	Bacillota_A	Clostridia	TANB77	CAG-508	CAG-269	CAG-269 sp017430135	1
Calf_MAG_03037	74.71	3.36	1935730	directly_assembled	no	no	Bacteria	Bacillota_A	Clostridia	TANB77	CAG-508	CAG-269	unclassified	1
Calf_MAG_22320	78.46	1.45	1656237	directly_assembled	no	yes	Bacteria	Bacillota_A	Clostridia	TANB77	CAG-508	CAKPSH01	CAKPSH01 sp934183325	1
Calf_MAG_00584	99.14	0.07	1619832	directly_assembled	yes	yes	Bacteria	Campylobacterota	Campylobacteria	Campylobacterales	Campylobacteraceae	Campylobacter_B	Campylobacter_B sp017469645	5
Calf_MAG_00651	99.88	0.55	1904342	directly_assembled	no	yes	Bacteria	Campylobacterota	Campylobacteria	Campylobacterales	Campylobacteraceae	Campylobacter	Campylobacter hyointestinalis	2
Calf_MAG_01496	89.74	0.81	2305834	directly_assembled	no	yes	Bacteria	Cyanobacteriota	Vampirovibrionia	Gastranaerophilales	Gastranaerophilaceae	CAG-196	CAG-196 sp002102975	2
Calf_MAG_00448	96.63	0	1593940	directly_assembled	yes	yes	Bacteria	Elusimicrobiota	Elusimicrobia	Elusimicrobiales	Elusimicrobiaceae	UBA1436	UBA1436 sp902794895	10
Calf_MAG_01784	98.88	2.25	1551266	directly_assembled	yes	yes	Bacteria	Bacillota	Bacilli	RFN20	CAG-826	RUG131	RUG131 sp900315885	2
Calf_MAG_01809	100	0	1615156	directly_assembled	no	yes	Bacteria	Bacillota	Bacilli	RFN20	CAG-826	RUG131	unclassified	7
Calf_MAG_01234	100	0	2992901	directly_assembled	yes	no	Bacteria	Pseudomonadota	Gammaproteobacteria	Burkholderiales	Burkholderiaceae_C	Pelistega	unclassified	8
Calf_MAG_01041	99.72	0	2923111	directly_assembled	no	yes	Bacteria	Pseudomonadota	Gammaproteobacteria	Enterobacterales_A	Pasteurellaceae	Gallibacterium	Gallibacterium salpingitidis	2
FIX_001	100	0	2637949	fix_to_complete	yes	yes	Bacteria	Pseudomonadota	Gammaproteobacteria	Enterobacterales_A	Pasteurellaceae	Gallibacterium	Gallibacterium anatis	1
Calf_MAG_17777	98.78	2.3	3257299	directly_assembled	yes	yes	Bacteria	Spirochaetota	Spirochaetia	Sphaerochaetales	Sphaerochaetaceae	RUG023	RUG023 sp900315435	2
Calf_MAG_00917	98.58	0.71	1825267	directly_assembled	yes	yes	Bacteria	Bacillota_A	Clostridia	Peptostreptococcales	Anaerovoracaceae	S5-A14a	S5-A14a sp900112915	5
Calf_MAG_16015	97.32	0	2441501	directly_assembled	yes	yes	Bacteria	Bacillota_A	Clostridia	Oscillospirales	Acutalibacteraceae	Eubacterium_R	Eubacterium_R sp014465955	2
Calf_MAG_20031	97.99	0.67	2513940	directly_assembled	yes	yes	Bacteria	Bacillota_A	Clostridia	Oscillospirales	Oscillospiraceae	Faecousia	Faecousia sp902767395	3
FIX_068	96.98	0.67	3905502	fix_to_complete	yes	yes	Bacteria	Bacillota_A	Clostridia	Oscillospirales	Oscillospiraceae	Limivicinus	Limivicinus sp900316205	2
Calf_MAG_19801	90.27	0	3462055	directly_assembled	yes	yes	Bacteria	Bacillota_A	Clostridia	Oscillospirales	Oscillospiraceae	Limivicinus	Limivicinus sp002450075	1
Calf_MAG_20302	94.63	1.34	2504918	directly_assembled	yes	yes	Bacteria	Bacillota_A	Clostridia	Oscillospirales	Oscillospiraceae	Vescimonas	Vescimonas sp900317425	1
Calf_MAG_21088	96.61	0	2922088	directly_assembled	yes	yes	Bacteria	Bacillota_A	Clostridia	Christensenellales	CAG-138	RUG472	unclassified	8
FIX_059	99.78	0	3259309	fix_to_complete	no	yes	Bacteria	Bacillota_A	Clostridia	Oscillospirales	Oscillospiraceae	Faecousia	unclassified	1
Calf_MAG_14407	95.56	0.03	1769986	directly_assembled	no	yes	Bacteria	Bacillota_A	Clostridia	Christensenellales	UBA3700	MGBC101980	unclassified	1
FIX_026	96.65	0.34	2592292	fix_to_complete	no	no	Bacteria	Pseudomonadota	Gammaproteobacteria	Xanthomonadales	Xanthomonadaceae	Pseudoxanthomonas_B	unclassified	3
Calf_MAG_16559	96.34	0	2182230	directly_assembled	no	yes	Bacteria	Pseudomonadota	Gammaproteobacteria	Burkholderiales	Burkholderiaceae_B	Ottowia	unclassified	13
Calf_MAG_16484	92.95	0.27	2491929	directly_assembled	yes	yes	Bacteria	Pseudomonadota	Gammaproteobacteria	Burkholderiales	Rhodocyclaceae	JAFZMK01	unclassified	3
Calf_MAG_21245	98.52	4.91	3752504	directly_assembled	no	yes	Bacteria	Bacillota_A	Clostridia	Christensenellales	CAG-74	UBA2862	unclassified	3
Calf_MAG_12349	97.91	0.48	2599622	directly_assembled	yes	yes	Bacteria	Bacillota_A	Clostridia	Lachnospirales	Lachnospiraceae	JAILFK01	JAILFK01 sp017634455	1
Calf_MAG_18566	99.77	0.31	2386238	directly_assembled	yes	yes	Bacteria	Bacillota_C	Negativicutes	Selenomonadales	Selenomonadaceae	Mitsuokella	Mitsuokella jalaludinii	5
Calf_MAG_18231	99.4	0	2534811	directly_assembled	yes	yes	Bacteria	Bacillota_C	Negativicutes	Veillonellales	Megasphaeraceae	Megasphaera	Megasphaera elsdenii	4
Calf_MAG_18072	100	0.63	2906358	directly_assembled	yes	yes	Bacteria	Bacillota_C	Negativicutes	Veillonellales	Dialisteraceae	Dialister	Dialister sp002320515	6
FIX_031	90.8	1.31	2614141	fix_to_complete	no	yes	Bacteria	Bacillota_C	Negativicutes	Selenomonadales	Selenomonadaceae	Anaerovibrio	unclassified	1
Calf_MAG_14634	98.66	0	2398041	directly_assembled	yes	yes	Bacteria	Bacillota_A	Clostridia	Oscillospirales	Acutalibacteraceae	UBA1417	UBA1417 sp003531055	1
Calf_MAG_02714	98.6	0	2144622	directly_assembled	yes	yes	Bacteria	Bacillota_A	Clostridia	Peptostreptococcales	Peptostreptococcaceae	Peptostreptococcus	Peptostreptococcus russellii_A	3
Calf_MAG_04443	100	0.37	2204994	directly_assembled	yes	yes	Bacteria	Bacillota	Bacilli	Lactobacillales	Streptococcaceae	Streptococcus	Streptococcus pasteurianus	1
Calf_MAG_14140	99.37	0	2778600	directly_assembled	no	yes	Bacteria	Bacillota_A	Clostridia	Lachnospirales	Lachnospiraceae	Faecalimonas	Faecalimonas umbilicata	2
Calf_MAG_13961	99.12	2.05	3740112	directly_assembled	yes	yes	Bacteria	Bacillota_A	Clostridia	Lachnospirales	Lachnospiraceae	Mediterraneibacter	Mediterraneibacter faecis	2
Calf_MAG_15242	99.32	0	3515541	directly_assembled	yes	yes	Bacteria	Bacillota_A	Clostridia	Oscillospirales	Ruminococcaceae	Ruminococcus_D	Ruminococcus_D sp900314975	3
Calf_MAG_15194	99.32	0	3310874	directly_assembled	yes	yes	Bacteria	Bacillota_A	Clostridia	Oscillospirales	Ruminococcaceae	Ruminococcus_D	Ruminococcus_D sp902786965	1
FIX_040	96.15	1.26	3352531	fix_to_complete	yes	yes	Bacteria	Bacillota_A	Clostridia	Lachnospirales	Lachnospiraceae	CAG-791	CAG-791 sp900317475	3
Calf_MAG_11706	96.26	0.19	3055767	directly_assembled	yes	yes	Bacteria	Bacillota_A	Clostridia	Lachnospirales	Lachnospiraceae	CAG-791	CAG-791 sp900317555	1
Calf_MAG_04701	99.05	2.22	2651997	directly_assembled	yes	yes	Bacteria	Bacillota	Bacilli	Erysipelotrichales	Erysipelotrichaceae	Bulleidia	Bulleidia timonensis	1
Calf_MAG_17113	99.19	0.81	2365001	directly_assembled	yes	yes	Bacteria	Actinomycetota	Coriobacteriia	Coriobacteriales	Coriobacteriaceae	Collinsella	unclassified	1
Calf_MAG_03539	100	0	2059889	directly_assembled	yes	yes	Archaea	Methanobacteriota	Methanobacteria	Methanobacteriales	Methanobacteriaceae	Methanobrevibacter_B	Methanobrevibacter_B boviskoreani	1
