# Supplementary material for: Nutritional gradients orchestrate spatiotemporal microbial assembly and adaptive evolution in the neonatal mammalian gut
Source: Research Square preprint supplement (doi:10.21203/rs.3.rs-7903532/v1), 2026-02-04
Supplement: Supplementary file 7 [file b2a71eebef3891a179a2128d.xlsx]

## Sheet: Supplementary Table S7
Publication sources of genomes included in the ACGG collection
No.	Article	Source
1	Assembly of 913 microbial genomes from metagenomic sequencing of the cow rumen	PRJEB21624
2	1200 high-quality metagenome-assembled genomes from the rumen of African cattle and their relevance in the context of sub-optimal feeding	PRJEB39057
3	Investigation of fiber utilization in the rumen of dairy cows based on metagenome-assembled genomes and single-cell RNA sequencing	PRJNA730102
4	An integrated gene catalog and over 10,000 metagenome-assembled genomes from the gastrointestinal microbiome of ruminants	fihShare.10373
5	A Unified Catalog of 19,251 Non-human Reference Species Genomes Provides New Insights into the Mammalian Gut Microbiomes	CNP0001390
6	Compendium of 4,941 rumen metagenome-assembled genomes for rumen microbiome biology and enzyme discovery	PRJEB31266
7	Cultivation and sequencing of rumen microbiome members from the Hungate1000 Collection	Website
8	Metagenomes and Assembled Genomes from Diarrhea-Affected Cattle (Bos taurus)	PRJNA661076
9	A global phylogenomic and metabolic reconstruction of the large intestine bacterial community of domesticated cattle	PRJNA681986
10	Functional and Phylogenetic Characterization of Bacteria in Bovine Rumen Using Fractionation of Ruminal Fluid	PRJEB47520
11	Metagenomic analysis reveals a dynamic microbiomewith diversified adaptive functions to utilize highlignocellulosic forages in the cattle rumen	PRJNA631951
12	Genome-centric investigation of bile acid metabolizing microbiota of dairy cows and associated diet-induced functional implications	figshare.14456637
