# Supplementary material for: Nutritional gradients orchestrate spatiotemporal microbial assembly and adaptive evolution in the neonatal mammalian gut
Source: Research Square preprint supplement (doi:10.21203/rs.3.rs-7903532/v1), 2026-02-04
Supplement: Supplementary file 8 [file b9089b7f14cad83143c2043a.xlsx]

## Sheet: pam_cluster
PAM cluster
Sample ID	Time point (day)	Cluster ID
time_01_10	1	C1
time_01_11	1	C2
time_01_12	1	C2
time_01_13	1	C2
time_01_14	1	C2
time_01_15	1	C3
time_01_16	1	C3
time_01_7	1	C1
time_01_8	1	C2
time_01_9	1	C3
time_03_10	3	C1
time_03_11	3	C2
time_03_12	3	C3
time_03_13	3	C3
time_03_14	3	C1
time_03_15	3	C2
time_03_16	3	C3
time_03_7	3	C1
time_03_8	3	C2
time_03_9	3	C3
time_07_10	7	C3
time_07_11	7	C1
time_07_12	7	C2
time_07_13	7	C3
time_07_14	7	C1
time_07_15	7	C2
time_07_16	7	C3
time_07_7	7	C3
time_07_8	7	C1
time_07_9	7	C2
time_13_10	13	C2
time_13_11	13	C1
time_13_12	13	C2
time_13_13	13	C3
time_13_14	13	C3
time_13_15	13	C1
time_13_7	13	C2
time_13_8	13	C2
time_13_9	13	C2
time_28_1	28	C2
time_28_10	28	C3
time_28_2	28	C3
time_28_3	28	C1
time_28_4	28	C2
time_28_5	28	C3
time_28_6	28	C1
time_28_7	28	C2
time_28_8	28	C3
time_28_9	28	C3
time_42_1	42	C1
time_42_10	42	C2
time_42_2	42	C2
time_42_3	42	C1
time_42_4	42	C2
time_42_5	42	C3
time_42_6	42	C3
time_42_7	42	C1
time_42_8	42	C3
time_42_9	42	C1
time_56_1	56	C2
time_56_10	56	C3
time_56_2	56	C3
time_56_3	56	C1
time_56_4	56	C2
time_56_5	56	C3
time_56_6	56	C1
time_56_7	56	C2
time_56_8	56	C3
time_56_9	56	C3
