# Supplementary material for: Nutritional gradients orchestrate spatiotemporal microbial assembly and adaptive evolution in the neonatal mammalian gut
Source: Research Square preprint supplement (doi:10.21203/rs.3.rs-7903532/v1), 2026-02-04
Supplement: Supplementary file 10 [file ee55f944ef05f1d522032e3c.xlsx]

## Sheet: Quality of MAG
Summary of assembly quality metrics for genomes in the NCGG
ID	Completeness	Contamination	Circlize	N50	GenomeSize	tRNA types (n)	Amino acid specificities (n)	rRNA types (n)
Calf_MAG_16375	100	3.31	0	179662	9133370	47	21	3
Calf_MAG_17881	99.99	0.07	0	755006	9108413	45	22	1
Calf_MAG_16350	100	3.78	0	358792	9015314	47	22	3
Calf_MAG_16257	95.62	2.23	0	24217	8943919	39	18	2
Calf_MAG_16378	100	4.41	0	59960	8931987	48	22	3
Calf_MAG_16384	100	3.9	0	69928	8909096	46	21	3
Calf_MAG_16376	93.24	9.6	0	11316	8897455	45	21	3
Calf_MAG_16370	100	1.95	0	867727	8849775	47	21	3
Calf_MAG_16383	100	4.17	0	109151	8839642	47	21	3
Calf_MAG_05889	100	8.46	0	36308	8828317	35	19	3
Calf_MAG_16363	100	1.72	0	490422	8825212	49	22	3
Calf_MAG_16356	100	2.95	0	115039	8822033	47	21	3
Calf_MAG_16354	100	2.25	0	157982	8819281	43	21	3
Calf_MAG_16366	100	1.83	0	376161	8814429	48	21	3
Calf_MAG_16353	100	1.76	0	458673	8812374	49	22	3
Calf_MAG_16373	100	1.9	0	239953	8803723	49	22	3
Calf_MAG_16352	100	1.81	0	625533	8802142	47	21	3
Calf_MAG_16369	100	2.21	0	57920	8790748	47	21	3
Calf_MAG_16351	100	2	0	112188	8790380	46	21	3
Calf_MAG_16385	100	1.82	0	64916	8751043	49	22	3
Calf_MAG_16361	100	1.66	0	488947	8749199	49	22	3
Calf_MAG_16372	100	2.35	0	150847	8744351	47	21	3
Calf_MAG_16386	100	1.59	0	446923	8729166	47	21	3
Calf_MAG_16367	100	1.93	0	350458	8712395	47	21	1
Calf_MAG_16374	100	3.44	0	37562	8694185	47	21	3
Calf_MAG_16355	99.97	3.59	0	16403	8653297	42	21	2
Calf_MAG_16380	100	1.5	0	773356	8652472	47	21	2
Calf_MAG_16365	99.86	4.98	0	19999	8618808	47	21	3
Calf_MAG_16368	99.97	4.45	0	16839	8538356	45	21	3
Calf_MAG_17880	99.88	0.11	0	17459	8491997	39	21	2
Calf_MAG_16362	100	3.18	0	420334	8468215	46	21	3
Calf_MAG_00209	99.45	7.69	0	19683	8372976	39	22	0
Calf_MAG_16364	100	0.8	0	373658	8240582	46	21	3
Calf_MAG_16371	82.95	6.46	0	7984	8154143	42	20	1
Calf_MAG_16418	98.04	8.58	0	105735	8100643	44	21	0
Calf_MAG_00225	99.97	0.59	0	328517	8035470	37	22	1
Calf_MAG_16359	90.05	7.61	0	6569	8034893	35	17	2
Calf_MAG_10594	98.14	9.79	0	18880	8031250	22	15	1
Calf_MAG_00212	99.96	4.86	0	61120	7940029	37	22	0
Calf_MAG_16382	87.34	7.18	0	8364	7878659	43	21	3
Calf_MAG_16388	100	0.56	0	228987	7857218	44	21	3
Calf_MAG_16298	99.99	2.73	0	67155	7856310	43	21	0
Calf_MAG_10065	93.81	8.57	0	15977	7842724	41	21	0
Calf_MAG_16307	100	1.81	0	27620	7823157	43	21	1
Calf_MAG_13167	96.59	9.93	0	10885	7820006	35	19	1
Calf_MAG_05294	100	9	0	65122	7819443	29	19	0
Calf_MAG_00227	99.92	0.81	0	632274	7747060	37	21	3
Calf_MAG_16301	100	0.82	0	46429	7739575	43	22	3
Calf_MAG_16305	100	2.39	0	212646	7738330	44	22	3
Calf_MAG_16303	100	1.16	0	54758	7724930	43	21	0
Calf_MAG_00214	99.89	0.64	0	607077	7698084	38	22	0
Calf_MAG_16381	87.28	5.33	0	7695	7696667	35	18	3
Calf_MAG_00211	99.89	0.64	0	632452	7694103	38	22	0
Calf_MAG_16302	99.99	2.56	0	76196	7692579	43	21	0
Calf_MAG_00224	99.93	0.67	0	253325	7680488	38	22	2
Calf_MAG_16300	99.97	3.59	0	33249	7678788	44	22	3
Calf_MAG_00206	99.9	0.76	0	127598	7674070	40	22	2
Calf_MAG_00215	99.57	0.58	0	62743	7635089	38	22	1
Calf_MAG_00213	99.93	0.72	0	38223	7580044	38	22	0
Calf_MAG_16290	99.09	7.68	0	6511	7574232	29	17	2
Calf_MAG_08721	99.99	6.85	0	141867	7572440	37	20	1
Calf_MAG_16310	99.84	2.92	0	20266	7565951	43	21	2
Calf_MAG_00222	92.78	0.77	0	33131	7528981	35	22	0
Calf_MAG_00218	92.67	2.79	0	8305	7517533	29	18	3
Calf_MAG_00219	98.46	1.31	0	20893	7497792	36	22	1
Calf_MAG_16291	85.74	8.08	0	10055	7464016	38	19	1
Calf_MAG_00216	99.6	0.89	0	24814	7444874	35	21	1
Calf_MAG_16306	92.96	3.75	0	8184	7353877	36	21	2
Calf_MAG_00221	92.1	2.75	0	11388	7352052	30	18	2
Calf_MAG_00223	97.61	2.34	0	12116	7328207	32	18	1
Calf_MAG_15327	99.95	9.31	0	31280	7325336	33	18	2
Calf_MAG_08723	95.75	9.94	0	138914	7321477	34	19	2
Calf_MAG_00226	96.9	2.58	0	11591	7315808	35	21	0
Calf_MAG_21641	100	2.2	0	15450	7230060	35	19	0
Calf_MAG_16400	89.24	8.21	0	11216	7221595	36	17	3
Calf_MAG_16393	99.96	0.3	0	203932	7047595	43	20	1
Calf_MAG_16297	90.43	2.51	0	6757	7017635	33	19	0
Calf_MAG_17882	73.77	0.56	0	4033	6792484	19	14	2
Calf_MAG_05073	99.87	1.83	0	131422	6766870	37	20	3
Calf_MAG_16360	74.69	2.62	0	3559	6757681	24	17	1
Calf_MAG_16379	79.33	5.47	0	5783	6710318	39	20	2
Calf_MAG_17900	99.55	6.96	0	8319	6690484	41	20	2
Calf_MAG_21519	100	3.03	0	76748	6659839	29	16	1
Calf_MAG_00208	89.99	5.14	0	5570	6642645	23	15	1
Calf_MAG_17902	99.99	3.6	0	25964	6597765	43	20	2
Calf_MAG_17886	100	2.09	0	57192	6584024	48	22	2
Calf_MAG_00220	89.15	4.78	0	4423	6575466	27	19	0
Calf_MAG_00217	82.58	6.87	0	4467	6545858	17	15	3
Calf_MAG_16316	99.98	0.15	0	353887	6515720	36	20	1
Calf_MAG_17888	100	0.83	0	272114	6505684	48	22	2
Calf_MAG_17906	100	2.54	0	105294	6479869	43	20	2
Calf_MAG_16413	99.99	7.15	0	67828	6468997	43	21	0
Calf_MAG_16296	82.35	3.81	0	8350	6466040	34	20	1
Calf_MAG_08987	99.65	9.37	0	108985	6458354	30	19	3
Calf_MAG_17899	100	0.79	0	103523	6445723	43	20	2
Calf_MAG_15331	99.91	9.48	0	33738	6391850	29	16	0
Calf_MAG_09030	89.73	9.42	0	12931	6385326	33	19	2
Calf_MAG_16311	80.31	1.88	0	4365	6368479	23	16	1
Calf_MAG_16299	86.85	4.96	0	6482	6363685	42	21	0
Calf_MAG_05067	99.91	2.5	0	284512	6356218	38	20	2
Calf_MAG_17903	100	0.79	0	111668	6350802	44	20	3
Calf_MAG_17897	100	1.26	0	49707	6336163	43	20	1
Calf_MAG_05071	99.83	0.58	0	278426	6329390	39	20	1
Calf_MAG_17905	100	0.83	0	102628	6314474	43	20	2
Calf_MAG_08979	93.62	5.84	0	15740	6312669	27	16	2
Calf_MAG_16294	76.48	9.83	0	2674	6284643	22	16	0
Calf_MAG_05070	95.17	0.88	0	262614	6249662	38	20	2
Calf_MAG_05074	97.23	1.06	0	256782	6234930	38	20	2
Calf_MAG_17752	100	0.41	0	238835	6232076	39	18	3
Calf_MAG_16377	82.12	1.53	0	26493	6224208	35	20	0
Calf_MAG_16258	99.99	0.82	0	52560	6218501	36	19	0
Calf_MAG_16308	78.54	3.61	0	4326	6211490	27	15	1
Calf_MAG_10944	99.9	9.46	0	37459	6208519	35	17	2
Calf_MAG_21680	96.98	1.33	0	29431	6201933	32	18	3
Calf_MAG_09029	88.23	9.21	0	46812	6192821	31	18	2
Calf_MAG_00210	85.93	3.39	0	3140	6192245	31	21	0
Calf_MAG_21432	100	0.45	0	285665	6192111	41	22	3
Calf_MAG_03456	78.82	9.47	0	23046	6178873	48	24	0
Calf_MAG_12863	100	6.77	0	139179	6168052	41	19	2
Calf_MAG_16285	99.99	0.48	0	158856	6156935	40	20	3
Calf_MAG_05072	99.66	0.82	0	125752	6154645	39	20	1
Calf_MAG_08892	99.99	4.77	0	56042	6147874	38	18	3
Calf_MAG_15325	100	9.52	0	33543	6138163	32	18	0
Calf_MAG_12261	100	9.89	0	31852	6118776	26	15	1
Calf_MAG_03603	96.22	9.63	0	59923	6109906	30	15	0
Calf_MAG_08720	88.31	0.59	0	221300	6097466	19	13	0
Calf_MAG_21571	100	4.85	0	38206	6093159	39	20	1
Calf_MAG_05076	94.33	4.43	0	201568	6086756	36	20	2
Calf_MAG_05069	96.59	3.09	0	38148	6083318	36	20	2
Calf_MAG_08988	99.97	2.23	0	33749	6082956	35	20	3
Calf_MAG_17884	99.95	2.25	0	12708	6061855	47	22	2
Calf_MAG_21525	100	2.18	0	18583	6051124	34	19	2
Calf_MAG_12931	96.27	9.54	0	7981	6047226	35	20	0
Calf_MAG_10589	100	8.32	0	20780	6044492	41	20	3
Calf_MAG_09016	99.99	3.41	0	131310	6044187	34	20	1
Calf_MAG_16410	100	6.1	0	77111	6041034	44	20	0
Calf_MAG_22071	98.34	9.66	0	27050	6033178	34	16	3
Calf_MAG_21608	100	7.67	0	2075026	5992168	43	22	3
Calf_MAG_16415	100	1.14	0	130439	5983380	43	20	0
Calf_MAG_09025	95.45	6.77	0	27238	5974986	20	15	0
Calf_MAG_03551	98.5	9.78	0	97246	5967136	34	19	3
Calf_MAG_12858	99.99	6.46	0	108772	5958464	40	19	0
Calf_MAG_15330	99.99	8.04	0	32552	5958118	34	17	2
Calf_MAG_14200	98.73	8.23	0	32622	5951571	39	19	2
Calf_MAG_14096	91.7	9.79	0	499264	5909658	38	21	3
Calf_MAG_08629	100	6.46	0	24237	5897996	35	20	2
Calf_MAG_05068	90.74	4.33	0	25975	5897001	35	20	1
Calf_MAG_16412	100	2.29	0	94651	5895932	43	20	0
Calf_MAG_12856	100	6.72	0	145123	5895207	41	19	2
Calf_MAG_12860	99.98	6.31	0	121854	5890630	40	19	2
Calf_MAG_08991	86.38	4.26	0	16348	5887426	37	20	2
Calf_MAG_21533	99.81	7.39	0	10171	5871892	33	18	1
Calf_MAG_14651	96.14	7.63	0	58797	5862018	35	17	2
Calf_MAG_08978	96.77	0.45	0	66728	5859620	38	20	3
Calf_MAG_08967	95.83	0.88	0	107574	5844401	38	20	0
Calf_MAG_07283	99.71	5.97	0	41077	5833531	37	19	1
Calf_MAG_16411	99.97	1.59	0	38193	5831830	43	20	1
Calf_MAG_19079	79.25	9.43	0	5477	5825705	25	12	0
Calf_MAG_12869	99.98	5.77	0	85131	5823827	34	16	1
Calf_MAG_08495	99.99	3.22	0	145177	5807312	38	20	1
Calf_MAG_08984	84.59	0.65	0	81941	5805994	29	19	1
Calf_MAG_10327	100	9.41	0	123528	5801982	42	20	1
Calf_MAG_12861	99.99	6.46	0	105842	5800517	39	19	1
Calf_MAG_15324	100	9.98	0	38129	5795855	36	19	3
Calf_MAG_16390	99.77	0.37	0	368154	5795729	44	21	3
Calf_MAG_12862	99.99	6.82	0	187922	5777117	37	18	0
Calf_MAG_12865	99.78	5.51	0	218172	5775862	36	18	0
Calf_MAG_21556	100	4.29	0	33871	5771669	39	20	2
Calf_MAG_16398	88.71	6.07	0	7227	5768305	38	19	3
Calf_MAG_12857	99.99	6.66	0	131851	5768195	40	19	0
Calf_MAG_16275	98.92	3.76	0	21439	5765976	40	19	1
Calf_MAG_03560	96.76	7.11	0	125725	5765646	36	19	2
Calf_MAG_16260	100	0.19	0	274262	5745467	38	19	0
Calf_MAG_16289	89.33	5.74	0	16323	5744421	34	18	1
Calf_MAG_17918	93.82	3.58	0	5652	5743724	33	16	2
Calf_MAG_09033	90.89	5.6	0	38867	5738308	24	19	3
Calf_MAG_08476	100	5.98	0	251356	5738043	38	20	3
Calf_MAG_17907	99.99	3.7	0	10181	5726275	33	17	1
Calf_MAG_17919	100	0.1	0	150289	5721799	43	20	1
Calf_MAG_10320	100	3.5	0	167926	5713330	41	19	0
Calf_MAG_16389	98.35	0.26	0	32554	5710146	43	20	3
Calf_MAG_12552	98.3	9.69	0	21802	5706199	24	15	1
Calf_MAG_21408	95.88	3.5	0	20811	5705232	30	18	0
Calf_MAG_16397	90.18	8.78	0	6106	5693852	27	17	0
Calf_MAG_08972	94.51	0.26	0	161711	5684031	38	21	3
Calf_MAG_21448	92.24	5.87	0	6434	5672499	17	13	0
Calf_MAG_12859	94.16	4.86	0	335870	5671539	40	18	0
Calf_MAG_16286	89.84	2.28	0	12772	5670684	34	18	0
Calf_MAG_21679	99.8	7.29	0	86830	5663579	31	18	3
Calf_MAG_17891	93.42	0.49	0	10096	5655361	43	22	0
Calf_MAG_16391	99.75	0.14	0	114415	5654620	42	20	3
Calf_MAG_08594	96.63	6.56	0	12103	5652897	28	16	2
Calf_MAG_08596	99.24	1.07	0	31692	5648949	22	15	2
Calf_MAG_08627	98.77	7.64	0	51208	5648598	30	18	3
Calf_MAG_21489	100	1.03	0	131853	5648079	38	20	0
Calf_MAG_08500	100	2.66	0	441938	5646068	40	20	3
Calf_MAG_21395	99.98	1.79	0	96288	5636180	37	19	1
Calf_MAG_08465	99.96	8.21	0	48819	5626295	36	19	3
Calf_MAG_16261	100	0.21	0	328221	5626002	38	19	1
Calf_MAG_17909	99.99	0.14	0	42992	5621140	43	20	0
Calf_MAG_17917	99.89	0.1	0	116268	5618828	43	20	0
Calf_MAG_21397	99.58	9	0	34659	5617399	27	16	1
Calf_MAG_08577	94.59	7.12	0	40621	5616648	34	20	3
Calf_MAG_08497	99.98	1.27	0	45168	5609376	38	19	1
Calf_MAG_15410	93.45	9.28	0	23109	5609163	38	19	1
Calf_MAG_16315	100	3.17	0	120066	5608671	41	21	3
Calf_MAG_08466	99.89	1.5	0	134161	5608579	37	19	3
Calf_MAG_08993	98.3	0.12	0	126524	5598711	33	19	0
Calf_MAG_21564	99.88	4.91	0	12686	5597515	37	19	2
Calf_MAG_17925	99.87	0.16	0	29769	5592262	43	20	0
Calf_MAG_08976	91.15	0.4	0	132357	5586997	35	20	1
Calf_MAG_13722	89.96	9.49	0	87131	5584668	36	17	1
Calf_MAG_13036	99.11	7.31	0	13536	5584606	26	17	2
Calf_MAG_07400	98.73	5.24	0	41375	5583837	26	16	0
Calf_MAG_10306	100	5.12	0	224879	5573151	44	21	2
Calf_MAG_21386	100	2.56	0	180075	5569306	36	20	2
Calf_MAG_08483	99.77	3.15	0	39889	5565468	38	20	1
Calf_MAG_13042	99.99	8.24	0	79443	5561431	39	19	2
Calf_MAG_12680	100	2.36	0	3869796	5560347	41	20	2
Calf_MAG_16423	92.62	2.63	0	12767	5553951	45	21	3
Calf_MAG_08598	100	9.69	0	68774	5552838	31	18	1
Calf_MAG_17914	91.56	3.29	0	17055	5551755	40	20	2
Calf_MAG_08982	93.54	7.87	0	17512	5544793	36	20	2
Calf_MAG_08724	98.36	0.76	0	247884	5536692	37	19	1
Calf_MAG_09023	95.46	4.96	0	36913	5531759	36	20	3
Calf_MAG_08467	95.75	2.86	0	170912	5530640	38	20	3
Calf_MAG_09036	76.32	7.56	0	6643	5519837	24	16	0
Calf_MAG_09358	91.14	9.26	0	12459	5519547	35	18	1
Calf_MAG_08602	99.98	4.54	0	46892	5517341	31	19	3
Calf_MAG_21493	99.98	0.65	0	29272	5515900	36	19	1
Calf_MAG_08451	95.75	1.09	0	25644	5515839	30	18	1
Calf_MAG_08983	87.57	4.55	0	14258	5515712	36	20	2
Calf_MAG_17898	75.77	2.07	0	4491	5512586	30	18	2
Calf_MAG_21553	100	2.11	0	22031	5508216	38	19	1
Calf_MAG_08964	99.18	0.79	0	105663	5503706	38	20	1
Calf_MAG_08477	100	0.53	0	109756	5501860	35	19	0
Calf_MAG_17883	87.63	0.74	0	8922	5498320	45	22	0
Calf_MAG_09013	85.81	6.13	0	59805	5497438	27	17	2
Calf_MAG_21433	100	0.88	0	55136	5492532	34	19	3
Calf_MAG_08439	96.82	1.65	0	180051	5488037	38	21	3
Calf_MAG_08974	91.86	0.48	0	124586	5485417	36	20	2
Calf_MAG_21434	100	0.57	0	74495	5478250	39	21	2
Calf_MAG_17923	97.9	3.8	0	11371	5477670	43	20	2
Calf_MAG_12864	92.82	4.21	0	129705	5476280	39	19	1
Calf_MAG_08954	87.18	9.64	0	86659	5475993	34	19	3
Calf_MAG_16287	91.87	1.8	0	13938	5471917	29	15	0
Calf_MAG_21502	100	3.77	0	354662	5464887	41	21	3
Calf_MAG_21516	100	3.7	0	369739	5461193	39	20	3
Calf_MAG_08623	99.47	1.66	0	65024	5457916	33	19	3
Calf_MAG_17911	91.7	1.5	0	6094	5455403	39	20	2
Calf_MAG_10456	84.09	9.27	0	7158	5439855	26	16	0
Calf_MAG_17889	94.98	1.34	0	7928	5439309	32	21	1
Calf_MAG_08590	97.56	8.69	0	13560	5432663	34	21	3
Calf_MAG_12855	92.93	3.88	0	93324	5430549	30	15	0
Calf_MAG_21490	100	3.53	0	9581	5428562	27	17	1
Calf_MAG_08999	54.71	6.4	0	7123	5425678	23	18	0
Calf_MAG_21417	100	0.22	0	108592	5423528	36	18	2
Calf_MAG_21566	100	1.43	0	48361	5415492	38	19	2
Calf_MAG_21396	98.07	3.94	0	99474	5397022	31	18	2
Calf_MAG_16284	79.78	4.57	0	5052	5395880	29	17	0
Calf_MAG_08873	93.49	7.81	0	61581	5393528	37	19	3
Calf_MAG_09022	99.82	0.26	0	81417	5392143	36	19	3
Calf_MAG_21492	99.99	2.35	0	24379	5388868	39	20	3
Calf_MAG_21454	100	0.46	0	90525	5387553	38	20	1
Calf_MAG_08616	100	2.83	0	64279	5386437	38	21	3
Calf_MAG_16392	87.66	2.65	0	6127	5381666	26	16	3
Calf_MAG_21406	99.31	4.2	0	60388	5381499	33	18	3
Calf_MAG_21452	100	0.51	0	88344	5380458	39	20	1
Calf_MAG_16277	94.29	3.52	0	29229	5367959	42	20	1
Calf_MAG_03579	99.82	3.92	0	27296	5367749	34	18	1
Calf_MAG_09031	91.63	5.46	0	46033	5358034	29	16	3
Calf_MAG_08614	100	1.91	0	57674	5357867	35	19	1
Calf_MAG_08631	95.47	2.27	0	33776	5348447	35	20	2
Calf_MAG_21389	100	0.67	0	253601	5341977	37	19	3
Calf_MAG_16259	99.74	0.41	0	25842	5337907	38	19	1
Calf_MAG_21582	93.99	2.61	0	8906	5336157	33	17	2
Calf_MAG_13037	99.98	3.27	0	142440	5331972	36	18	1
Calf_MAG_21588	100	2.81	0	50667	5328690	38	20	3
Calf_MAG_08450	99.94	0.92	0	48844	5327489	36	19	1
Calf_MAG_08621	99.97	9.98	0	72109	5322416	35	20	2
Calf_MAG_08790	97.49	3.76	0	70605	5309721	35	20	3
Calf_MAG_07343	99.92	8.66	0	46194	5304259	39	19	2
Calf_MAG_07348	88.46	3.75	0	9506	5298914	37	20	2
Calf_MAG_21609	100	2.96	0	678208	5297942	41	21	3
Calf_MAG_21637	89.81	5.03	0	12783	5297475	27	15	1
Calf_MAG_09014	86.11	3.59	0	88380	5296565	31	19	1
Calf_MAG_10634	99.94	7.02	0	42722	5286930	26	16	3
Calf_MAG_08462	99.99	3.29	0	229814	5286206	38	19	1
Calf_MAG_17908	92.12	2.83	0	4422	5283850	40	20	0
Calf_MAG_08618	94.35	9.22	0	25627	5282839	40	22	3
Calf_MAG_08717	94.17	6.63	0	31823	5279365	26	16	3
Calf_MAG_12694	72.28	6.77	0	4223	5277517	17	12	2
Calf_MAG_21561	99.99	2.54	0	18091	5275503	34	19	1
Calf_MAG_12681	100	1	0	2854997	5270321	41	20	2
Calf_MAG_21463	100	0.61	0	22862	5270128	39	20	1
Calf_MAG_21462	100	0.29	0	43689	5266218	37	20	0
Calf_MAG_17924	79.28	7.06	0	2489	5264465	38	19	2
Calf_MAG_08523	95.16	0.09	0	88667	5257881	33	19	0
Calf_MAG_21547	96.85	4.92	0	40777	5257781	36	20	3
Calf_MAG_08502	100	0.24	0	495387	5255326	41	21	3
Calf_MAG_07344	99.95	7.74	0	57683	5255208	39	19	3
Calf_MAG_09000	97.5	2.7	0	94935	5252551	36	20	3
Calf_MAG_21384	100	0.01	0	253601	5240211	36	19	1
Calf_MAG_21419	100	5.49	0	8884	5238714	33	19	2
Calf_MAG_16279	99.89	1.35	0	66571	5234772	43	20	2
Calf_MAG_08620	95.43	8.3	0	53832	5232772	33	20	2
Calf_MAG_08448	100	0.1	0	185328	5229745	40	20	1
Calf_MAG_03550	99.98	6.73	0	235779	5225832	36	19	2
Calf_MAG_08519	99.98	1.2	0	191064	5225379	38	19	0
Calf_MAG_08479	99.98	0.29	0	188117	5224188	36	20	3
Calf_MAG_05288	95.28	1.8	0	153795	5222871	42	22	0
Calf_MAG_08568	99.91	7.15	0	54804	5222050	30	18	1
Calf_MAG_07434	99.97	6.45	0	15389	5221501	37	19	1
Calf_MAG_07365	99.22	1.96	0	14164	5220524	33	18	2
Calf_MAG_08872	99.99	7.45	0	80211	5218627	38	19	3
Calf_MAG_16283	99.94	0.72	0	284015	5216329	43	20	1
Calf_MAG_07435	99.53	3.74	0	15769	5216135	30	16	2
Calf_MAG_16401	90.9	2	0	20145	5214098	37	19	2
Calf_MAG_16263	99.01	0.86	0	202885	5211235	43	20	1
Calf_MAG_08647	97.55	2.55	0	49811	5209824	32	19	2
Calf_MAG_21568	100	0.08	0	130549	5208760	31	17	1
Calf_MAG_21415	100	0.1	0	227352	5208400	37	19	1
Calf_MAG_08840	90.02	6.97	0	13027	5206962	30	18	1
Calf_MAG_08453	99.99	0.56	0	115033	5197487	39	20	0
Calf_MAG_21529	87.12	6.03	0	6437	5196370	20	15	1
Calf_MAG_15258	99.74	9	0	20377	5194336	23	11	1
Calf_MAG_14653	89.57	5.6	0	55311	5192817	41	19	0
Calf_MAG_08475	99.82	2.33	0	169268	5187778	37	19	3
Calf_MAG_21549	97.27	1	0	68949	5183116	30	17	3
Calf_MAG_21681	78.18	5.85	0	4538	5182991	13	12	1
Calf_MAG_21543	100	3.05	0	13235	5179912	29	17	2
Calf_MAG_21632	100	0.7	0	30632	5179803	32	16	1
Calf_MAG_08595	100	7.76	0	54044	5176803	34	20	2
Calf_MAG_21570	96.19	3.6	0	8938	5175443	31	17	1
Calf_MAG_08944	77.12	7.22	0	18246	5175072	32	20	3
Calf_MAG_08619	91.98	9.83	0	13475	5173420	28	18	1
Calf_MAG_08474	99.99	0.28	0	248278	5170708	39	20	1
Calf_MAG_21667	100	1.25	0	31480	5163750	30	17	1
Calf_MAG_08478	99.97	1.33	0	124897	5158722	35	18	1
Calf_MAG_09028	88.99	1.85	0	15092	5155464	34	20	2
Calf_MAG_08533	96.91	1.07	0	1218154	5154479	39	20	3
Calf_MAG_08498	90.57	2.38	0	90904	5149667	39	20	3
Calf_MAG_03652	96	9.18	0	19003	5143990	34	18	3
Calf_MAG_08457	99.98	0.65	0	197719	5143092	38	19	1
Calf_MAG_21598	100	1.29	0	19170	5140558	38	19	1
Calf_MAG_21404	94.98	2.63	0	11009	5136696	25	16	3
Calf_MAG_19119	63.15	8.9	0	20534	5123583	46	21	2
Calf_MAG_17910	90.28	3.21	0	3997	5122034	40	20	0
Calf_MAG_21595	100	0.26	0	73084	5118886	34	19	3
Calf_MAG_21400	95.62	0.69	0	30924	5117896	33	19	2
Calf_MAG_08095	90.49	6.47	0	49741	5116431	34	20	2
Calf_MAG_21674	100	0.75	0	23955	5115239	38	19	3
Calf_MAG_08487	99.96	0.62	0	248493	5111087	38	19	1
Calf_MAG_10588	99.98	9.09	0	22244	5110435	42	21	2
Calf_MAG_09042	52.23	9.88	0	3487	5109974	18	13	0
Calf_MAG_08461	99.91	0.82	0	170010	5109578	39	20	1
Calf_MAG_21477	100	0.56	0	26561	5106894	37	19	3
Calf_MAG_21388	100	0.04	0	253601	5106537	39	20	1
Calf_MAG_08471	99.97	0.63	0	193858	5104227	38	19	1
Calf_MAG_17921	85.03	4.86	0	8432	5104075	36	19	0
Calf_MAG_21429	100	1.76	0	10995	5100723	28	18	2
Calf_MAG_08455	99.98	0.62	0	197421	5099713	38	19	2
Calf_MAG_07409	96.47	4.87	0	43122	5099354	27	16	0
Calf_MAG_07413	95.19	7.94	0	7646	5094132	26	16	2
Calf_MAG_21530	93.98	1.65	0	12002	5091031	33	17	1
Calf_MAG_08470	99.76	0.8	0	152696	5088411	38	20	3
Calf_MAG_07339	93.01	3.16	0	36837	5088302	40	19	1
Calf_MAG_21537	97.74	3.21	0	21642	5086502	31	18	3
Calf_MAG_13040	94.24	3.56	0	10310	5085886	30	16	2
Calf_MAG_21486	99.93	1.37	0	27462	5081657	31	18	2
Calf_MAG_08458	99.97	0.5	0	197421	5080780	38	19	1
Calf_MAG_08468	84.56	6.98	0	9207	5073785	31	18	3
Calf_MAG_07363	97.73	4.29	0	14518	5071413	32	18	1
Calf_MAG_08491	99.5	5.67	0	139695	5070152	40	21	3
Calf_MAG_21545	100	0.16	0	113794	5066916	31	17	1
Calf_MAG_21398	98.38	0.07	0	132809	5065654	29	17	1
Calf_MAG_14654	91.74	3.35	0	55346	5062199	41	19	0
Calf_MAG_08490	99.94	0.81	0	51758	5061922	39	20	1
Calf_MAG_16278	87.32	2.46	0	15087	5061745	40	20	0
Calf_MAG_21438	100	0.09	0	133417	5060901	37	19	1
Calf_MAG_10602	99.98	2.83	0	4408841	5048014	42	20	3
Calf_MAG_08624	96.89	1.28	0	59981	5047213	33	20	2
Calf_MAG_13639	94.46	9.25	0	19638	5047157	28	16	2
Calf_MAG_21602	100	0.05	0	148643	5046390	38	19	2
Calf_MAG_21597	100	0.12	0	105117	5042718	37	19	2
Calf_MAG_21410	66.31	6.08	0	7358	5034161	18	13	3
Calf_MAG_16272	98.66	1.81	0	24075	5031608	40	19	1
Calf_MAG_07322	99.63	7.85	0	65223	5027792	40	22	2
Calf_MAG_21405	99.35	0.99	0	65102	5027712	28	16	1
Calf_MAG_08556	99.87	0.54	0	50312	5024102	31	19	3
Calf_MAG_21423	99.92	2.14	0	13440	5024014	33	17	1
Calf_MAG_10198	100	5.8	0	75428	5023400	38	18	3
Calf_MAG_13538	91.52	5.58	0	8835	5019463	22	16	1
Calf_MAG_16421	89.72	2.59	0	9569	5018079	38	20	0
Calf_MAG_21544	100	0.3	0	53732	5015556	38	19	2
Calf_MAG_21402	94.77	3.22	0	56987	5014817	27	18	2
Calf_MAG_08527	99.99	0.34	0	164444	5014444	39	20	1
Calf_MAG_03626	89.05	5.74	0	70951	5013986	25	14	0
Calf_MAG_12685	100	1.74	0	62671	5010811	39	19	2
Calf_MAG_09035	88.62	0.6	0	20761	5004226	35	20	2
Calf_MAG_21676	97.03	1.33	0	110580	5003526	35	19	3
Calf_MAG_07379	99.8	3.11	0	11483	5003056	27	16	2
Calf_MAG_13631	97.65	9.49	0	22946	5002253	21	13	0
Calf_MAG_08854	97.62	2.81	0	72257	5000944	38	20	3
Calf_MAG_16357	57.13	5.92	0	3954	4999728	23	16	2
Calf_MAG_21503	100	0.42	0	127731	4998914	33	17	3
Calf_MAG_21567	100	0.12	0	112775	4998872	37	18	3
Calf_MAG_07406	99.79	6.14	0	67309	4998836	24	14	0
Calf_MAG_21605	100	1.51	0	27448	4996836	38	20	3
Calf_MAG_16394	89.15	2.78	0	13309	4993130	27	17	3
Calf_MAG_08512	99.95	0.51	0	158689	4992667	38	19	0
Calf_MAG_08722	77.22	2.51	0	185663	4992033	12	10	0
Calf_MAG_16280	89.04	0.87	0	18945	4990766	41	20	0
Calf_MAG_13549	100	7.01	0	31594	4983647	39	20	2
Calf_MAG_21416	100	0.18	0	122819	4982737	38	19	1
Calf_MAG_21390	99.93	0.96	0	11336	4982321	37	19	1
Calf_MAG_21394	95.59	1.73	0	123834	4982292	35	18	1
Calf_MAG_02457	95.37	8.01	0	20405	4981603	28	20	3
Calf_MAG_21506	99.99	2.55	0	23087	4977887	30	17	2
Calf_MAG_08472	99.02	3.12	0	32329	4973240	36	20	2
Calf_MAG_03659	91.71	7.87	0	13605	4968393	24	15	3
Calf_MAG_21539	98.06	3.37	0	33900	4968237	33	19	3
Calf_MAG_16270	90.37	3.68	0	15897	4967803	40	20	1
Calf_MAG_21425	99.99	0.56	0	10952	4965797	33	18	0
Calf_MAG_08441	99.93	0.14	0	177560	4965464	38	19	1
Calf_MAG_03593	99.96	2.39	0	562486	4965046	37	19	3
Calf_MAG_21600	100	0.96	0	46874	4962975	32	18	3
Calf_MAG_21510	100	0.04	0	41069	4961281	32	17	1
Calf_MAG_08449	99.99	0.12	0	187128	4958201	40	20	2
Calf_MAG_07362	99.69	1.45	0	80018	4956559	33	18	0
Calf_MAG_12246	99.95	5.55	0	34277	4956516	38	20	1
Calf_MAG_03602	96.56	5.64	0	528540	4950015	39	20	3
Calf_MAG_08501	86.34	5.55	0	255299	4947614	37	20	3
Calf_MAG_02383	93.87	3.71	0	13864	4947062	22	13	0
Calf_MAG_05293	99.85	1.75	0	159534	4946264	37	18	0
Calf_MAG_21487	100	0.64	0	143552	4944180	38	20	2
Calf_MAG_12240	97.29	5.7	0	38654	4944088	26	14	0
Calf_MAG_08600	94.78	4.16	0	27994	4943148	20	13	1
Calf_MAG_21538	100	0.07	0	154687	4941893	35	19	2
Calf_MAG_21607	100	0	0	43961	4936584	33	18	3
Calf_MAG_21461	100	1.07	0	43181	4935319	32	19	3
Calf_MAG_16276	90.94	2.06	0	14532	4935305	40	20	1
Calf_MAG_08447	99.99	0.11	0	180771	4933550	40	20	1
Calf_MAG_08452	99.99	0.12	0	185959	4930507	40	20	1
Calf_MAG_17916	90.64	3.77	0	3689	4929769	38	20	0
Calf_MAG_07421	99.98	0.79	0	135203	4927967	39	20	3
Calf_MAG_07341	99.95	0.31	0	47629	4926161	40	19	1
Calf_MAG_10674	99.99	8.55	0	57130	4923593	39	18	1
Calf_MAG_21437	100	0.3	0	136477	4921242	31	17	2
Calf_MAG_21678	99.86	0.52	0	30817	4921061	33	17	2
Calf_MAG_21501	99.93	0.86	0	146057	4920074	41	21	3
Calf_MAG_12693	99.05	6.68	0	15442	4917951	33	18	2
Calf_MAG_08091	97.26	4.84	0	64983	4916514	40	20	1
Calf_MAG_21546	88.56	7.57	0	6178	4916472	23	14	1
Calf_MAG_10583	99.9	4.16	0	4131612	4916336	41	20	3
Calf_MAG_21531	100	0.09	0	41855	4914525	38	20	3
Calf_MAG_08552	99.05	9.17	0	43911	4910991	37	19	2
Calf_MAG_02456	100	6.17	0	107348	4908840	31	20	3
Calf_MAG_16271	99.95	1.02	0	327096	4907773	44	21	3
Calf_MAG_21534	100	0.24	0	30968	4907632	24	16	2
Calf_MAG_16264	99.96	1.16	0	258423	4907383	43	20	1
Calf_MAG_07445	99.9	1.91	0	37855	4906617	35	18	3
Calf_MAG_03553	96.55	3.17	0	44252	4905759	36	19	2
Calf_MAG_21407	95.87	3.75	0	30619	4901739	25	16	0
Calf_MAG_21594	99.18	2.75	0	8695	4901225	28	17	1
Calf_MAG_16273	99.94	0.98	0	258423	4900285	43	20	1
Calf_MAG_14649	94.94	1.86	0	9785	4899415	25	16	3
Calf_MAG_08517	99.73	0.58	0	98433	4898776	34	18	0
Calf_MAG_14655	90.34	5.46	0	31986	4898617	37	18	0
Calf_MAG_02358	91.07	9.62	0	33739	4893872	28	17	2
Calf_MAG_08572	100	5.63	0	30683	4893575	36	19	3
Calf_MAG_08637	88.85	3.81	0	23930	4893289	32	20	2
Calf_MAG_16282	99.92	0.69	0	254272	4889045	44	21	3
Calf_MAG_03555	98.43	2.81	0	52740	4886155	34	18	2
Calf_MAG_16267	99.93	0.69	0	254230	4884605	43	20	1
Calf_MAG_08507	99.95	0.27	0	184397	4883140	38	19	2
Calf_MAG_07336	99.03	1.27	0	46969	4883132	36	19	0
Calf_MAG_09024	79.04	5.53	0	15732	4883096	23	15	3
Calf_MAG_16281	99.91	0.68	0	147841	4882791	43	20	0
Calf_MAG_14650	92.33	1.79	0	11096	4882061	35	17	3
Calf_MAG_12671	100	4.41	0	69947	4881690	31	17	1
Calf_MAG_17920	77.44	4.38	0	3764	4879110	28	16	0
Calf_MAG_08608	100	0.19	0	72725	4878657	36	19	2
Calf_MAG_08445	94.27	2.79	0	184108	4877299	36	19	2
Calf_MAG_16269	88.18	3.5	0	6499	4875659	40	20	1
Calf_MAG_08114	97.22	7.75	0	51778	4875506	35	20	3
Calf_MAG_12267	99.96	2.59	0	56155	4875399	41	20	3
Calf_MAG_08454	99.97	0.23	0	190104	4874822	37	18	0
Calf_MAG_21521	100	0.14	0	120494	4874365	34	18	3
Calf_MAG_21451	100	0.01	0	91566	4866251	33	18	1
Calf_MAG_09774	99.97	1.69	0	21071	4866044	33	19	2
Calf_MAG_16266	99.89	0.81	0	159301	4866014	43	20	1
Calf_MAG_12263	99.92	2.31	0	41195	4861200	38	20	0
Calf_MAG_12239	92.84	6.7	0	69226	4860045	21	11	0
Calf_MAG_03557	97	2.95	0	154459	4859768	36	19	3
Calf_MAG_03623	96.85	4.8	0	20070	4859752	28	17	2
Calf_MAG_19092	91.36	9.05	0	57387	4854475	45	21	3
Calf_MAG_07391	99.42	2.87	0	23588	4852280	35	19	1
Calf_MAG_07401	98.43	5.54	0	13514	4849604	31	17	2
Calf_MAG_08521	99.43	2.08	0	87325	4849486	34	19	0
Calf_MAG_16420	62.41	4.87	0	2631	4848053	14	11	2
Calf_MAG_11430	100	2.73	0	50031	4846273	37	19	1
Calf_MAG_09027	81.28	8.61	0	7017	4846123	16	11	1
Calf_MAG_13039	85.92	9.65	0	6426	4840068	19	14	1
Calf_MAG_21592	100	0	0	42595	4833676	32	17	0
Calf_MAG_14648	91.78	1.11	0	30078	4832081	35	18	3
Calf_MAG_09113	88.08	7.96	0	9058	4831041	37	19	1
Calf_MAG_05761	97.63	5.47	0	31467	4830869	41	20	0
Calf_MAG_08506	92.85	0.11	0	89879	4827921	33	18	2
Calf_MAG_12682	100	1.34	0	455547	4826988	36	19	0
Calf_MAG_13985	99.99	6.74	0	16096	4825251	31	16	2
Calf_MAG_08510	99.89	0.7	0	94642	4822014	39	20	1
Calf_MAG_21542	96.62	1.6	0	17193	4821931	27	18	3
Calf_MAG_21535	95.3	7.47	0	6975	4820413	28	17	2
Calf_MAG_08513	99.67	0.56	0	81973	4820129	33	17	0
Calf_MAG_08503	95.23	0.42	0	290444	4818381	34	19	3
Calf_MAG_07370	99.87	0.33	0	135866	4814822	38	19	2
Calf_MAG_21512	100	0.16	0	133417	4812439	36	19	0
Calf_MAG_07337	99.95	0.28	0	41853	4810047	39	19	2
Calf_MAG_21403	93.08	0.28	0	31748	4809296	27	17	1
Calf_MAG_21668	99.59	0.15	0	13452	4808666	31	15	1
Calf_MAG_12270	98.81	3.12	0	36384	4808052	31	17	1
Calf_MAG_07364	99.87	1.43	0	14658	4806144	27	16	0
Calf_MAG_21420	99.97	0.33	0	12108	4804707	29	18	3
Calf_MAG_02450	99.94	1.64	0	84337	4802438	29	19	3
Calf_MAG_21457	99.99	2.65	0	26239	4797510	34	18	2
Calf_MAG_07249	73.54	4.6	0	51373	4797492	23	14	1
Calf_MAG_21428	100	0.36	0	21535	4796233	35	18	1
Calf_MAG_07441	99.98	1.03	0	121777	4795813	37	19	1
Calf_MAG_08611	96.43	6.69	0	275515	4795698	37	20	3
Calf_MAG_21445	100	0.88	0	13861	4793967	23	13	3
Calf_MAG_08489	92.32	1.89	0	142590	4791120	38	20	2
Calf_MAG_08546	85.21	7.1	0	42857	4790509	32	18	2
Calf_MAG_08604	95.98	6.88	0	17859	4788367	31	19	2
Calf_MAG_21453	100	0.16	0	49971	4787594	38	19	1
Calf_MAG_02525	99.91	5.36	0	139605	4785969	29	19	3
Calf_MAG_07414	99.85	1.87	0	100814	4785861	38	19	2
Calf_MAG_17892	81.86	2.76	0	4541	4785173	33	21	0
Calf_MAG_09018	59.43	8.89	0	9172	4784936	25	18	2
Calf_MAG_08582	99.98	9.33	0	22462	4781201	34	19	1
Calf_MAG_07456	99.92	0.88	0	122060	4778672	35	19	3
Calf_MAG_07345	94.68	0.64	0	31637	4774680	38	19	1
Calf_MAG_14658	88.42	4.43	0	13396	4771174	31	18	0
Calf_MAG_08603	99.52	9.68	0	49494	4769939	35	18	2
Calf_MAG_08473	99.82	2.44	0	38406	4769934	36	20	1
Calf_MAG_21601	97.33	3.75	0	9176	4768746	33	18	2
Calf_MAG_09005	89.1	5.7	0	141802	4760256	31	18	3
Calf_MAG_07340	88.9	0.25	0	31374	4759861	41	20	2
Calf_MAG_07293	92.2	7.99	0	18993	4758321	39	20	2
Calf_MAG_21427	99.53	5.12	0	9607	4758060	28	18	2
Calf_MAG_08482	99.83	0.16	0	119198	4756276	37	19	1
Calf_MAG_08703	97.35	9.17	0	28276	4756112	34	20	2
Calf_MAG_07452	99.95	0.98	0	113886	4755257	38	19	2
Calf_MAG_17904	73.44	2.26	0	3756	4754593	22	17	0
Calf_MAG_21578	98.7	2.6	0	8952	4754479	31	18	1
Calf_MAG_07425	99.16	1.28	0	48382	4753174	29	17	3
Calf_MAG_21562	99.95	1.73	0	26481	4749326	25	16	3
Calf_MAG_16396	77.56	3.12	0	6501	4748234	25	15	1
Calf_MAG_07419	99.31	1.1	0	141719	4747988	35	18	2
Calf_MAG_08617	88.2	7.95	0	50695	4747483	26	17	1
Calf_MAG_07381	99.22	0.8	0	79561	4745975	38	19	3
Calf_MAG_08534	99.48	0.01	0	135172	4743112	37	19	1
Calf_MAG_08605	100	1.55	0	54638	4742500	34	18	2
Calf_MAG_08968	67.14	9.71	0	3280	4741465	13	11	1
Calf_MAG_08509	99.69	0.9	0	184422	4741260	37	19	2
Calf_MAG_16323	99.99	2.8	0	161807	4740920	37	19	0
Calf_MAG_21508	100	0.19	0	77066	4739349	38	19	1
Calf_MAG_21579	100	0.15	0	171765	4736175	38	19	2
Calf_MAG_07368	99.96	0.44	0	128683	4736059	38	19	2
Calf_MAG_08985	76.11	5.15	0	221548	4733640	28	19	2
Calf_MAG_12652	99.72	8.97	0	8537	4732054	33	17	3
Calf_MAG_08463	88.9	0.94	0	18996	4730905	31	17	0
Calf_MAG_21654	99.98	5.39	0	14373	4730364	27	15	1
Calf_MAG_08481	95.04	0.02	0	39778	4725249	34	17	0
Calf_MAG_21599	100	0.19	0	144048	4725093	38	19	1
Calf_MAG_07449	99.84	3.04	0	97375	4724636	36	19	3
Calf_MAG_21455	99.68	2.32	0	12124	4721385	31	18	1
Calf_MAG_21399	89.99	1.83	0	16867	4721248	19	13	2
Calf_MAG_21554	100	0.1	0	79082	4719380	38	19	2
Calf_MAG_16321	99.61	2.63	0	27220	4714678	39	20	3
Calf_MAG_21671	100	0.02	0	73164	4712638	37	19	3
Calf_MAG_03558	99.61	0.69	0	215331	4712364	34	19	2
Calf_MAG_09034	84.58	0.99	0	49144	4709530	25	15	3
Calf_MAG_08924	98.95	3.89	0	164972	4707685	33	20	3
Calf_MAG_08354	92.53	8.41	0	43873	4705986	35	18	2
Calf_MAG_19436	100	7.55	0	58103	4704303	44	21	1
Calf_MAG_08525	94.58	0.82	0	113229	4704250	34	19	0
Calf_MAG_08494	87.02	0.83	0	18369	4702685	30	20	2
Calf_MAG_03627	99.97	2.38	0	96539	4702257	37	19	2
Calf_MAG_08884	98.54	0.69	0	69206	4701769	37	20	3
Calf_MAG_21575	100	0.08	0	148295	4698013	38	19	2
Calf_MAG_21576	97.66	0.55	0	18577	4697854	24	16	2
Calf_MAG_07376	99.8	1.01	0	115036	4694650	36	19	3
Calf_MAG_12269	98.07	0.93	0	43345	4693931	38	20	2
Calf_MAG_21482	100	0.85	0	83851	4693562	35	18	0
Calf_MAG_03556	90.27	5.16	0	12278	4692413	29	15	3
Calf_MAG_14652	87.78	1.42	0	6176	4691763	17	12	0
Calf_MAG_08946	94.18	6.37	0	115992	4691687	34	18	3
Calf_MAG_07429	99.94	0.58	0	140666	4690319	39	19	3
Calf_MAG_08797	99.86	6.21	0	108750	4689686	33	20	3
Calf_MAG_03672	99.97	2.39	0	113929	4689129	37	19	2
Calf_MAG_07451	99.88	1.03	0	24189	4688470	35	19	1
Calf_MAG_21442	100	0.01	0	110302	4687957	38	19	1
Calf_MAG_21509	100	0.08	0	43064	4684095	37	19	1
Calf_MAG_21446	100	0.01	0	11413	4679484	24	14	1
Calf_MAG_16419	75.96	7.45	0	62704	4678721	30	19	2
Calf_MAG_21604	100	0.5	0	32346	4677485	36	19	1
Calf_MAG_07395	99.9	3	0	104273	4676823	32	18	2
Calf_MAG_13041	90.71	2.16	0	9480	4676268	23	13	1
Calf_MAG_10322	100	4.7	0	138837	4675581	38	19	1
Calf_MAG_07457	99.96	0.52	0	122060	4674425	37	19	2
Calf_MAG_07350	99.86	1.92	0	20991	4673765	28	17	2
Calf_MAG_03614	99.98	2.37	0	73257	4673760	37	19	2
Calf_MAG_21536	99.99	2.74	0	15365	4673515	29	16	3
Calf_MAG_08504	99.81	1.26	0	126318	4670252	35	19	1
Calf_MAG_03618	99.97	2.34	0	99848	4668931	37	19	2
Calf_MAG_09010	78.89	7.74	0	95268	4668056	37	20	3
Calf_MAG_03641	89.42	6.17	0	17061	4667790	34	18	2
Calf_MAG_07304	99.95	0.48	0	45043	4665113	38	19	2
Calf_MAG_08480	93.2	0.46	0	217556	4663913	36	19	1
Calf_MAG_12573	98.22	8.66	0	29365	4660176	41	22	3
Calf_MAG_08591	100	3.27	0	60440	4658230	36	20	2
Calf_MAG_10706	100	7.22	0	60117	4656066	39	20	1
Calf_MAG_21658	99.88	4.34	0	6320	4655581	32	18	1
Calf_MAG_06411	99.99	6.59	0	69332	4653522	33	17	1
Calf_MAG_21548	100	0.28	0	53598	4653430	35	19	3
Calf_MAG_21488	100	0.16	0	133588	4652027	37	19	1
Calf_MAG_03604	99.95	4.64	0	35842	4651477	37	19	2
Calf_MAG_07416	98.14	0.49	0	53505	4650778	32	18	1
Calf_MAG_21426	95.51	6.23	0	5987	4650524	29	17	3
Calf_MAG_13181	98.06	7.13	0	16742	4649151	30	17	2
Calf_MAG_21498	100	0.13	0	128336	4648578	36	19	0
Calf_MAG_05303	93.98	0.5	0	203235	4648191	25	16	0
Calf_MAG_10886	99.93	2.74	0	733536	4646943	42	20	3
Calf_MAG_21496	100	0.17	0	123327	4645422	36	19	2
Calf_MAG_12255	95.35	2.89	0	30754	4644298	32	17	3
Calf_MAG_08586	99.87	7.38	0	45169	4641776	31	19	1
Calf_MAG_08328	93.04	7.92	0	27986	4639453	34	19	1
Calf_MAG_10329	100	2.36	0	203228	4637450	37	18	3
Calf_MAG_00207	61.95	0.64	0	2978	4636700	16	13	1
Calf_MAG_12567	98.64	7.54	0	37189	4636212	36	22	3
Calf_MAG_07424	99.87	1.73	0	40148	4632630	30	17	3
Calf_MAG_21642	100	1.77	0	55522	4632437	35	18	0
Calf_MAG_09006	88.33	3.71	0	92855	4631222	29	20	3
Calf_MAG_00094	94.23	6.26	0	25014	4630477	39	20	2
Calf_MAG_21587	99.97	3.97	0	8757	4630113	24	17	1
Calf_MAG_07361	99.31	2.23	0	14670	4630033	31	16	1
Calf_MAG_07383	97.52	1.78	0	28813	4629319	38	19	2
Calf_MAG_08898	90.85	2.19	0	14363	4626146	40	20	3
Calf_MAG_07410	98.33	2.66	0	32068	4625537	33	18	1
Calf_MAG_16318	94.62	2.83	0	29541	4623157	23	16	3
Calf_MAG_21563	100	0.04	0	72608	4622180	38	19	1
Calf_MAG_16313	64.91	9.89	0	3040	4621452	11	9	0
Calf_MAG_08574	100	0.17	0	59069	4618375	35	19	1
Calf_MAG_08524	91.5	0.44	0	167889	4617720	30	18	0
Calf_MAG_08554	97.24	3.24	0	29504	4617361	30	19	3
Calf_MAG_07450	99.32	1.02	0	83060	4614309	27	16	0
Calf_MAG_02372	100	5.52	0	91073	4613666	27	19	2
Calf_MAG_21665	100	0.16	0	132645	4613399	35	19	2
Calf_MAG_07430	95.01	1.5	0	20870	4612748	31	18	2
Calf_MAG_07427	95.48	4.12	0	45240	4611482	30	17	3
Calf_MAG_08592	99.98	0.25	0	65395	4607936	34	19	1
Calf_MAG_03660	99.9	8.5	0	33893	4604255	37	19	3
Calf_MAG_07440	99.41	0.65	0	43820	4603077	34	18	1
Calf_MAG_10883	99.99	7.79	0	2370784	4601717	42	20	3
Calf_MAG_14656	88.6	3.29	0	6087	4601627	23	13	0
Calf_MAG_03552	90.37	5.27	0	9939	4600503	35	19	2
Calf_MAG_08553	100	0.36	0	48967	4599784	35	19	2
Calf_MAG_07374	99.64	0.18	0	119698	4599266	38	19	2
Calf_MAG_03606	99.73	2.04	0	82586	4598755	30	18	3
Calf_MAG_07458	89.72	2.92	0	22084	4598146	28	17	3
Calf_MAG_21569	100	1.84	0	18418	4593906	26	16	1
Calf_MAG_07407	92.79	5.18	0	13065	4592951	27	16	0
Calf_MAG_08492	92.5	2.05	0	20350	4592119	39	20	1
Calf_MAG_08628	92.71	5.41	0	59859	4591497	28	17	1
Calf_MAG_10379	99.94	2.77	0	2571650	4588875	45	21	3
Calf_MAG_08938	99.96	4.46	0	128655	4586151	35	20	1
Calf_MAG_21540	100	0.51	0	33151	4585692	38	19	1
Calf_MAG_10361	99.99	5.83	0	3425798	4584843	40	19	3
Calf_MAG_05299	99.47	0.2	0	135878	4584399	39	19	2
Calf_MAG_07466	94.23	1.52	0	15960	4581682	29	16	1
Calf_MAG_16409	83.67	7.63	0	3092	4580939	31	18	0
Calf_MAG_07857	99.01	2.44	0	311767	4580885	36	19	1
Calf_MAG_10891	99.99	7.08	0	2385719	4578937	42	20	3
Calf_MAG_03634	95.86	1.65	0	93860	4577548	37	19	2
Calf_MAG_10022	99.94	9.93	0	50857	4577448	39	20	3
Calf_MAG_21459	92.14	2.48	0	10648	4577208	29	17	1
Calf_MAG_07402	94.47	1.3	0	12672	4576872	25	15	0
Calf_MAG_10893	99.98	2.63	0	1671292	4574354	42	20	3
Calf_MAG_21474	100	0.12	0	48207	4572674	31	18	0
Calf_MAG_21491	99.85	0.13	0	24242	4570839	34	17	1
Calf_MAG_09769	94.79	6.85	0	32077	4568882	33	17	1
Calf_MAG_09001	84.93	4.95	0	9960	4567986	31	17	1
Calf_MAG_08639	96	0.09	0	72202	4567907	34	19	2
Calf_MAG_08822	95.55	5.64	0	196130	4567769	33	18	3
Calf_MAG_10839	97.8	9.51	0	21456	4566112	34	18	0
Calf_MAG_08446	80.49	3.67	0	28488	4565090	32	20	3
Calf_MAG_08567	100	0.18	0	86185	4564688	35	19	2
Calf_MAG_07384	99.06	4.09	0	29174	4564050	38	19	1
Calf_MAG_03594	91.04	1.07	0	114058	4563358	34	18	1
Calf_MAG_07333	99.75	0.36	0	47850	4563271	38	20	1
Calf_MAG_16408	81.08	4.19	0	4635	4562361	25	14	0
Calf_MAG_03636	96.16	1.24	0	80868	4561082	37	19	2
Calf_MAG_09040	65.05	9.91	0	4822	4559745	28	18	3
Calf_MAG_08831	90.75	7.2	0	52011	4559164	33	19	2
Calf_MAG_08587	67.54	8.53	0	19638	4558064	27	16	2
Calf_MAG_21431	95.65	2.21	0	13180	4557145	35	19	1
Calf_MAG_03671	99.98	2.33	0	63984	4556824	37	19	2
Calf_MAG_21661	98.16	0.56	0	11358	4556250	28	15	0
Calf_MAG_21745	77.97	7.6	0	6960	4555803	32	16	2
Calf_MAG_02453	99.96	1.45	0	28256	4553310	31	20	3
Calf_MAG_07423	97.4	0.5	0	24083	4553133	30	16	1
Calf_MAG_21430	100	1.19	0	59010	4552725	36	19	2
Calf_MAG_08895	83.2	8.33	0	25099	4550044	33	19	3
Calf_MAG_07351	98.19	0.6	0	29200	4549897	33	18	1
Calf_MAG_07356	99.43	2.52	0	105457	4548878	37	19	2
Calf_MAG_10904	99.98	2.51	0	2360796	4548590	42	20	3
Calf_MAG_07443	95.23	1.85	0	79200	4547073	33	17	1
Calf_MAG_08853	78.61	9.62	0	15453	4546530	32	19	3
Calf_MAG_03640	99.96	1.68	0	104586	4546128	33	18	2
Calf_MAG_12574	98.63	7.29	0	29259	4546037	43	22	2
Calf_MAG_03596	99.7	1.47	0	81834	4545859	37	19	0
Calf_MAG_12684	100	0.69	0	82552	4545454	37	19	1
Calf_MAG_10892	99.95	2.51	0	2360521	4545235	42	20	3
Calf_MAG_03590	99.79	1.77	0	95515	4545192	35	19	2
Calf_MAG_10604	99.96	1.13	0	2425905	4544509	41	20	3
Calf_MAG_06648	96.86	7.19	0	35097	4542231	38	18	1
Calf_MAG_10887	99.87	2.43	0	632385	4542059	42	20	3
Calf_MAG_12265	93.89	2.3	0	37969	4540944	38	20	1
Calf_MAG_21560	100	0.08	0	44891	4540069	35	19	2
Calf_MAG_02451	99.97	0.88	0	86988	4539584	33	20	3
Calf_MAG_08865	90.69	5.14	0	82669	4535156	37	20	1
Calf_MAG_10894	99.98	2.49	0	2359074	4534129	42	20	3
Calf_MAG_03601	89.23	7.54	0	414431	4533773	38	20	3
Calf_MAG_08753	97.19	4.5	0	18887	4533691	37	20	2
Calf_MAG_21640	99.99	0.05	0	54381	4532674	36	19	0
Calf_MAG_21603	98.86	1.27	0	10839	4532334	28	17	2
Calf_MAG_13553	99.99	7.72	0	39236	4531128	31	18	3
Calf_MAG_12264	89.73	6.01	0	25495	4529011	32	20	1
Calf_MAG_10907	99.98	2.41	0	2357712	4528991	42	20	3
Calf_MAG_10906	99.98	2.41	0	2359080	4528918	42	20	3
Calf_MAG_07453	98.33	0.35	0	43782	4528910	33	18	1
Calf_MAG_13726	64.83	5.41	0	3181	4528907	27	16	3
Calf_MAG_14642	95.48	8.95	0	161530	4528563	37	18	1
Calf_MAG_09038	61.73	7.56	0	3950	4527661	17	13	1
Calf_MAG_21573	100	0.01	0	16208	4526709	31	16	0
Calf_MAG_16293	63.36	2.55	0	2648	4526227	17	13	1
Calf_MAG_12568	99.78	5.92	0	39802	4523834	37	22	0
Calf_MAG_08652	99.88	6.93	0	63582	4523785	35	17	3
Calf_MAG_10911	99.98	3.13	0	2342782	4523208	42	20	3
Calf_MAG_03650	93.44	1.56	0	36285	4521790	30	19	2
Calf_MAG_21470	99.99	1.24	0	24999	4521728	33	17	1
Calf_MAG_21617	100	0.03	0	58695	4521542	36	19	1
Calf_MAG_08939	99.94	0.36	0	139003	4520788	37	20	1
Calf_MAG_14643	93.83	2.22	0	18761	4520618	35	19	2
Calf_MAG_21652	95.09	3.81	0	8740	4519513	24	15	1
Calf_MAG_14657	90.61	2.55	0	6736	4519447	34	17	1
Calf_MAG_07459	92.5	1.53	0	12690	4519238	27	16	1
Calf_MAG_07428	95.65	0.2	0	11788	4518237	27	16	1
Calf_MAG_21511	100	0.11	0	135393	4517591	37	19	1
Calf_MAG_16320	99.91	4.25	0	114411	4517124	38	19	0
Calf_MAG_21626	99.88	1.06	0	9204	4516791	30	17	1
Calf_MAG_12238	80.83	6.74	0	31001	4515652	35	18	0
Calf_MAG_21444	99.85	1.73	0	18680	4513958	22	12	0
Calf_MAG_08599	99.96	0.06	0	46245	4510603	21	13	1
Calf_MAG_03580	99.34	0.85	0	71661	4508817	32	19	0
Calf_MAG_07436	93.62	1.02	0	50686	4508812	34	20	3
Calf_MAG_07454	90.2	0.53	0	104038	4504184	38	19	1
Calf_MAG_21449	91.74	9.54	0	358419	4503986	34	19	3
Calf_MAG_08565	99.98	0.02	0	108822	4502852	32	20	3
Calf_MAG_07372	89.69	6.95	0	8374	4501681	25	16	2
Calf_MAG_09062	99.98	6.15	0	42338	4499512	36	19	3
Calf_MAG_21619	100	0.79	0	41932	4499247	37	19	1
Calf_MAG_08549	82.55	6.3	0	67985	4497922	32	18	2
Calf_MAG_10264	89.92	8.17	0	14761	4496409	34	17	0
Calf_MAG_02452	99.98	1.99	0	18470	4494585	31	20	3
Calf_MAG_08606	80.35	4.81	0	44464	4493728	28	16	3
Calf_MAG_07371	88.97	1.93	0	8213	4491937	28	17	2
Calf_MAG_08528	79.83	3.3	0	1176165	4489980	31	21	3
Calf_MAG_08823	99.35	0.42	0	55288	4488239	36	21	3
Calf_MAG_05284	91.04	1.99	0	197182	4488070	45	21	3
Calf_MAG_08980	75.69	2.38	0	81208	4488040	31	20	2
Calf_MAG_05298	99.11	0.4	0	131205	4485711	32	17	0
Calf_MAG_16265	81.3	4.84	0	4481	4485460	34	19	0
Calf_MAG_05292	94.63	1.99	0	610420	4485415	39	20	3
Calf_MAG_10767	99.97	7.84	0	32116	4484635	31	17	0
Calf_MAG_03554	86.93	3.13	0	8637	4483094	30	18	2
Calf_MAG_13586	100	6.02	0	2767510	4482871	36	21	2
Calf_MAG_08951	99.91	1.32	0	68980	4482481	35	18	3
Calf_MAG_12259	91.54	4.54	0	46842	4482271	30	16	0
Calf_MAG_19133	100	8.77	0	96950	4482178	45	22	1
Calf_MAG_08570	100	0.21	0	88610	4481492	37	19	1
Calf_MAG_03658	94.49	3.56	0	20786	4481263	36	19	2
Calf_MAG_08903	79.93	7.33	0	41116	4480576	28	16	3
Calf_MAG_21495	99.66	0.07	0	34648	4479554	31	17	1
Calf_MAG_07198	79.55	7.99	0	5777	4479209	29	19	1
Calf_MAG_05280	91.09	2.04	0	100558	4478177	45	21	2
Calf_MAG_08169	93.75	9.64	0	46843	4477001	26	15	1
Calf_MAG_08925	92.36	0.5	0	164995	4474015	37	20	1
Calf_MAG_03610	99.84	2.36	0	18272	4472703	27	15	3
Calf_MAG_03613	99.9	1.65	0	30546	4470632	36	19	2
Calf_MAG_21611	95.12	1.76	0	6976	4468477	24	17	3
Calf_MAG_21625	89.58	6.91	0	8133	4465268	23	16	1
Calf_MAG_21387	86.09	1.71	0	5189	4465123	17	14	1
Calf_MAG_12260	92.26	2.93	0	31332	4464520	25	17	1
Calf_MAG_10603	99.94	3.04	0	4397549	4464477	42	20	3
Calf_MAG_21494	99.54	0.01	0	31428	4463519	36	19	2
Calf_MAG_03632	99.8	2.47	0	48508	4461897	36	19	2
Calf_MAG_03588	91.67	3.93	0	30180	4459758	35	19	2
Calf_MAG_07397	93.74	0.45	0	12773	4456680	31	19	1
Calf_MAG_08612	100	0.01	0	124423	4455545	38	20	3
Calf_MAG_21436	100	0.58	0	29503	4454177	32	17	1
Calf_MAG_05304	99.58	0.12	0	136898	4450640	39	19	2
Calf_MAG_05297	99.82	2.79	0	136876	4448279	36	18	2
Calf_MAG_03582	99.74	1.68	0	30344	4446845	31	16	1
Calf_MAG_05295	99.3	0.24	0	100024	4445907	38	19	2
Calf_MAG_21580	99.99	0.06	0	46986	4445785	32	17	2
Calf_MAG_08601	91.23	5.11	0	9423	4444112	21	15	2
Calf_MAG_08916	97.73	8.88	0	101153	4438313	36	18	1
Calf_MAG_08634	99.98	0.09	0	28186	4438128	32	19	2
Calf_MAG_08573	82.57	2.66	0	50292	4437349	28	18	1
Calf_MAG_12679	98.85	2.99	0	62790	4436210	33	17	1
Calf_MAG_03564	93.34	3.75	0	19673	4435250	35	18	2
Calf_MAG_21649	100	0.17	0	30152	4433637	31	18	3
Calf_MAG_07398	93.13	0.57	0	65961	4433078	34	19	1
Calf_MAG_09120	98.77	7.07	0	42651	4432712	37	21	2
Calf_MAG_03591	84.58	5.52	0	52787	4431824	38	19	3
Calf_MAG_13602	99.12	9.87	0	19477	4431372	27	15	3
Calf_MAG_05302	90.94	0.35	0	583467	4429021	39	20	3
Calf_MAG_02402	96.31	6.86	0	23189	4428813	27	16	1
Calf_MAG_10311	100	5.38	0	596287	4425504	44	21	3
Calf_MAG_10590	99.96	0.27	0	4405048	4419900	42	20	3
Calf_MAG_11762	91.74	3.09	0	134575	4418784	46	22	3
Calf_MAG_03561	91.7	3	0	18501	4418758	35	19	3
Calf_MAG_21465	100	0.01	0	27402	4416755	36	18	0
Calf_MAG_03617	97.86	1.87	0	29747	4416231	35	19	2
Calf_MAG_10049	95.52	4.44	0	45999	4416147	35	20	3
Calf_MAG_08520	96.53	0.17	0	37641	4415741	37	18	0
Calf_MAG_21589	99.82	2.48	0	8904	4414016	28	17	1
Calf_MAG_05289	95.44	0.28	0	126487	4412725	31	17	1
Calf_MAG_08579	81	4.48	0	39828	4412532	28	17	2
Calf_MAG_12250	99.95	2.47	0	68986	4411288	43	21	1
Calf_MAG_14082	100	9.23	0	41759	4410290	33	18	2
Calf_MAG_03595	90.52	2.1	0	33804	4407319	36	19	2
Calf_MAG_07455	88.34	3.82	0	12106	4406748	25	16	1
Calf_MAG_21424	100	1.39	0	16385	4406005	36	19	0
Calf_MAG_21558	95.74	0.56	0	10942	4404638	21	14	1
Calf_MAG_03575	90.45	3.54	0	17039	4404256	34	19	2
Calf_MAG_19412	100	9.78	0	14763	4403542	40	21	2
Calf_MAG_08006	93.95	2.47	0	52008	4402829	32	19	1
Calf_MAG_03586	87.27	2.61	0	774574	4400756	38	20	3
Calf_MAG_21528	99.92	1.83	0	24881	4400458	36	19	1
Calf_MAG_21469	100	0.48	0	24514	4399425	33	17	0
Calf_MAG_03655	96.93	2.7	0	24704	4399090	26	18	2
Calf_MAG_08805	83.01	7.74	0	55261	4398530	28	17	3
Calf_MAG_08764	88.16	8.03	0	40393	4396348	34	20	3
Calf_MAG_14094	97.84	2.68	0	43099	4392149	37	20	0
Calf_MAG_21581	94.01	0.67	0	15406	4391115	32	18	2
Calf_MAG_07394	90.21	0.23	0	49087	4389833	37	19	2
Calf_MAG_03643	88.79	5.31	0	84118	4389686	29	18	2
Calf_MAG_13724	97.32	2.32	0	112467	4387777	34	17	3
Calf_MAG_21480	100	0.23	0	74191	4387544	32	17	2
Calf_MAG_08593	99.96	1.39	0	25907	4387537	29	17	2
Calf_MAG_07431	95.88	0.62	0	10328	4387421	27	17	1
Calf_MAG_13035	81.48	5.52	0	7567	4385677	13	8	0
Calf_MAG_10716	99.99	6.02	0	56443	4385291	35	19	1
Calf_MAG_08162	97.01	4.08	0	28833	4380141	23	13	2
Calf_MAG_11763	98.89	2.82	0	302164	4379887	43	20	1
Calf_MAG_08046	100	6.14	0	57225	4379750	33	18	3
Calf_MAG_16387	56.43	9.06	0	3648	4378797	24	16	1
Calf_MAG_12248	95.2	2.48	0	17841	4378747	34	19	1
Calf_MAG_07252	99.98	0.82	0	89433	4377245	38	19	1
Calf_MAG_21615	93.36	1.8	0	9412	4376855	31	18	2
Calf_MAG_21520	97.73	0.84	0	19415	4375842	33	17	2
Calf_MAG_10360	99.94	0.33	0	3124107	4374128	42	20	3
Calf_MAG_21647	99.95	0	0	41881	4374018	33	19	0
Calf_MAG_12692	95.01	5.91	0	7300	4373954	19	12	2
Calf_MAG_21507	99.99	0.11	0	36765	4373630	34	19	0
Calf_MAG_08496	98.86	0.51	0	32716	4373159	35	19	2
Calf_MAG_03581	95.06	2.26	0	26231	4372758	38	19	3
Calf_MAG_12678	99.32	0.36	0	70841	4372596	33	18	2
Calf_MAG_05254	99.92	5.53	0	85214	4372568	42	20	3
Calf_MAG_08493	89.57	0.71	0	37259	4370979	36	20	3
Calf_MAG_12549	83.73	7.37	0	6701	4369913	24	16	1
Calf_MAG_14641	92.7	8.53	0	142210	4369744	33	16	0
Calf_MAG_10268	99.18	0.17	0	129973	4369371	33	19	3
Calf_MAG_12271	88.51	2.9	0	28396	4368654	33	19	1
Calf_MAG_08609	80.72	9.15	0	18395	4368244	22	15	1
Calf_MAG_21458	99.99	0	0	33588	4367423	33	17	1
Calf_MAG_08499	83.03	0.37	0	8884	4367122	23	15	0
Calf_MAG_10372	99.97	6.1	0	161868	4364805	41	20	3
Calf_MAG_21552	100	0.17	0	22732	4363993	32	18	0
Calf_MAG_07408	88.96	0.82	0	12096	4363593	26	15	2
Calf_MAG_08986	64.71	4.83	0	47084	4362193	32	19	2
Calf_MAG_08588	99.99	0.1	0	37317	4361779	35	19	1
Calf_MAG_21557	99.26	1.26	0	11278	4361570	29	16	1
Calf_MAG_08931	93.15	9.65	0	17953	4360721	33	18	1
Calf_MAG_13718	96.89	3.2	0	109211	4360643	40	19	2
Calf_MAG_20988	88.58	9.56	0	391024	4360015	45	21	3
Calf_MAG_21620	99.94	1.73	0	14143	4359241	32	18	1
Calf_MAG_10964	99.54	7.71	0	1667977	4358942	41	20	3
Calf_MAG_12653	99.99	1.23	0	71610	4358795	38	19	2
Calf_MAG_08881	98.87	2.83	0	22983	4358566	37	20	2
Calf_MAG_05296	95.8	0.31	0	102851	4358148	31	16	1
Calf_MAG_10425	99.88	0.22	0	2574984	4357839	45	21	3
Calf_MAG_12559	99.39	8.79	0	87730	4357427	30	17	1
Calf_MAG_10386	99.96	0.67	0	2886109	4356822	42	20	3
Calf_MAG_13091	99.97	7.98	0	20483	4356325	32	18	0
Calf_MAG_12253	99.34	1.05	0	36719	4355957	28	15	1
Calf_MAG_09220	98.99	3.54	0	71012	4353010	35	21	3
Calf_MAG_12341	89.29	9.7	0	11942	4352683	15	10	2
Calf_MAG_21483	100	0.01	0	28993	4352007	32	18	0
Calf_MAG_10304	100	2.17	0	2622337	4351817	44	21	3
Calf_MAG_07373	98.91	0.44	0	34115	4351210	33	16	2
Calf_MAG_13616	98.01	6.18	0	17280	4350631	30	16	2
Calf_MAG_10334	100	1.64	0	329026	4350540	41	19	0
Calf_MAG_21037	94.83	8.59	0	48089	4350207	45	22	1
Calf_MAG_08975	73.31	7.52	0	35589	4348675	29	19	3
Calf_MAG_03620	98.29	2.81	0	18998	4348119	32	18	1
Calf_MAG_08569	95.89	0.26	0	58058	4346705	35	19	1
Calf_MAG_12262	99.62	2.29	0	41157	4346366	36	19	1
Calf_MAG_08700	90.97	6.61	0	145105	4346284	33	19	3
Calf_MAG_21392	82.38	2.1	0	4820	4345745	24	15	2
Calf_MAG_07288	99.75	4.15	0	75555	4343927	38	19	1
Calf_MAG_10346	100	8.73	0	4088261	4343362	44	20	3
Calf_MAG_08890	99.27	3.41	0	37050	4343244	36	19	1
Calf_MAG_08874	95	5.64	0	47114	4342844	34	18	2
Calf_MAG_21527	98.49	1.06	0	11564	4341528	37	19	1
Calf_MAG_21377	100	2.84	0	16530	4341250	34	19	2
Calf_MAG_07460	91.53	1.26	0	9294	4339286	29	17	1
Calf_MAG_09009	80.71	5.55	0	53952	4335978	23	16	2
Calf_MAG_08559	90.97	4.14	0	32980	4334872	29	17	3
Calf_MAG_05282	80.91	4.16	0	10101	4334170	41	19	1
Calf_MAG_08578	67.39	8.97	0	24590	4334113	26	16	2
Calf_MAG_13719	96.43	6.71	0	101084	4331312	32	15	0
Calf_MAG_08684	96.99	2.55	0	68260	4329541	34	18	1
Calf_MAG_08896	81.05	6.55	0	13642	4329183	15	11	2
Calf_MAG_10587	99.38	7.47	0	19806	4328870	38	18	2
Calf_MAG_13731	96.64	2.51	0	297859	4328426	33	16	2
Calf_MAG_10628	99.9	7.27	0	3721654	4328190	40	20	3
Calf_MAG_12672	97.52	1.12	0	59815	4326733	32	19	1
Calf_MAG_03587	86.33	0.66	0	84670	4326325	29	16	0
Calf_MAG_21522	95.4	2.12	0	15002	4324172	20	16	1
Calf_MAG_20973	91.37	5.61	0	915395	4323830	44	21	3
Calf_MAG_13175	99.52	4.24	0	31965	4323487	19	13	0
Calf_MAG_21614	95.85	4.64	0	7654	4322112	24	14	2
Calf_MAG_11669	100	9.69	0	3579210	4322095	42	20	3
Calf_MAG_12673	98.92	1.39	0	77523	4321416	32	18	0
Calf_MAG_03583	97.59	2.72	0	19451	4319719	32	17	2
Calf_MAG_07415	95.41	0.72	0	12602	4319205	33	16	3
Calf_MAG_08117	92.5	6.1	0	22546	4319062	28	20	3
Calf_MAG_10412	99.76	0.51	0	1500585	4318279	45	21	3
Calf_MAG_08508	74.43	8.16	0	71394	4317884	35	21	2
Calf_MAG_09017	69.49	7.8	0	25943	4317686	22	17	1
Calf_MAG_10593	99.51	8.25	0	19277	4317430	38	18	1
Calf_MAG_10901	99.98	1.84	0	2169792	4316262	42	20	3
Calf_MAG_13580	95.91	6.84	0	38059	4316151	30	17	3
Calf_MAG_08929	86.19	2.54	0	924760	4316123	40	20	3
Calf_MAG_21479	100	0.01	0	54868	4314911	37	19	1
Calf_MAG_03633	94.35	2.05	0	14622	4314231	33	19	3
Calf_MAG_22277	98.01	5.13	0	19421	4314155	38	19	1
Calf_MAG_10416	99.78	3.76	0	1131560	4313218	45	21	3
Calf_MAG_05300	93.38	0.35	0	304406	4310598	37	20	3
Calf_MAG_01416	94.35	1.82	0	11897	4309342	22	17	1
Calf_MAG_03664	91.02	2.6	0	21764	4307287	30	18	3
Calf_MAG_03647	93.69	2.9	0	42531	4305445	26	18	2
Calf_MAG_08056	98.65	2.06	0	87088	4304620	35	20	3
Calf_MAG_07388	91.1	0.38	0	44521	4303105	35	18	1
Calf_MAG_11667	100	5.52	0	4101899	4302284	42	20	3
Calf_MAG_21485	85.02	2.2	0	80497	4302035	41	21	3
Calf_MAG_08921	89.76	2.68	0	15085	4301141	30	18	1
Calf_MAG_12675	98.64	1.66	0	133277	4299210	37	19	1
Calf_MAG_07393	91.85	2.4	0	10411	4297437	27	15	2
Calf_MAG_21418	92.38	3.87	0	6608	4294882	30	16	2
Calf_MAG_16358	53.46	3.86	0	2135	4294181	14	12	1
Calf_MAG_21643	100	0.04	0	18274	4292625	35	19	3
Calf_MAG_03668	93.46	7.96	0	12336	4292288	30	17	3
Calf_MAG_09683	99.99	2.41	0	38828	4291597	39	22	3
Calf_MAG_08947	91.37	0.61	0	107349	4288726	39	20	2
Calf_MAG_21467	96.1	0.53	0	25227	4288370	28	16	0
Calf_MAG_21574	99.99	0.13	0	20398	4288036	28	16	0
Calf_MAG_21586	98.13	1.64	0	14711	4286277	30	17	1
Calf_MAG_08857	99.62	0.3	0	90555	4285136	37	19	1
Calf_MAG_03625	97.05	2.77	0	44590	4281987	34	19	2
Calf_MAG_03584	97.59	1.83	0	20427	4281520	30	15	1
Calf_MAG_03622	93.66	3.34	0	16551	4281364	34	18	2
Calf_MAG_07380	93.85	0.96	0	14558	4281121	22	16	1
Calf_MAG_07386	94.95	0.19	0	51994	4280368	28	15	0
Calf_MAG_10038	99.95	2.78	0	47196	4280299	36	19	2
Calf_MAG_07309	99.84	4.06	0	155002	4280244	39	19	1
Calf_MAG_21583	99.36	0.37	0	14648	4280065	33	18	0
Calf_MAG_14646	96.7	1.17	0	20368	4279495	41	19	1
Calf_MAG_10302	100	3.98	0	899799	4278189	44	21	3
Calf_MAG_03656	93.21	1.68	0	51472	4275028	36	19	2
Calf_MAG_09432	99.89	5.46	0	30520	4274871	30	17	2
Calf_MAG_13721	97.21	2.07	0	106119	4274742	39	19	2
Calf_MAG_07294	99.98	4.41	0	17410	4273914	29	18	1
Calf_MAG_07462	89.25	4.08	0	8271	4273641	22	16	1
Calf_MAG_03577	93.02	2.34	0	24234	4273328	34	18	3
Calf_MAG_10591	99.94	0.15	0	2431810	4271077	41	20	3
Calf_MAG_21610	94.73	1.46	0	9913	4269922	34	19	2
Calf_MAG_06305	92.44	9.36	0	25252	4268874	40	21	0
Calf_MAG_03649	93.19	5.86	0	19060	4268147	30	16	3
Calf_MAG_10739	99.98	7.41	0	82964	4264540	41	19	1
Calf_MAG_08855	94.14	1.57	0	29433	4263603	37	19	1
Calf_MAG_12683	97.94	1.41	0	78509	4261321	30	17	2
Calf_MAG_14645	96.46	4.63	0	18647	4260803	33	17	0
Calf_MAG_10358	99.91	0.79	0	2588042	4260046	42	20	3
Calf_MAG_07632	99.94	8.77	0	46696	4259807	39	19	3
Calf_MAG_08518	91.42	0.24	0	39185	4259372	28	18	2
Calf_MAG_10388	99.97	2.66	0	1138997	4257467	38	19	3
Calf_MAG_09770	99.57	4.17	0	23199	4256999	31	18	3
Calf_MAG_08638	71.94	9.67	0	34163	4254006	27	18	3
Calf_MAG_21447	100	0.37	0	17575	4253306	17	12	2
Calf_MAG_05286	87.58	2.12	0	31558	4253230	43	21	0
Calf_MAG_07260	98.06	4.83	0	28059	4251515	37	19	1
Calf_MAG_05290	90.92	2.79	0	140108	4250280	37	20	3
Calf_MAG_11662	100	5.55	0	207392	4248300	33	16	1
Calf_MAG_10938	99.73	4.85	0	2483181	4247804	41	20	3
Calf_MAG_21435	99.96	0.58	0	23907	4246611	36	19	1
Calf_MAG_09011	60.7	9.15	0	266261	4245938	35	20	3
Calf_MAG_07377	93.35	0.39	0	16913	4245798	30	17	0
Calf_MAG_10965	99.73	4.7	0	2424171	4244310	41	20	3
Calf_MAG_08847	91.29	4	0	21442	4243554	32	18	1
Calf_MAG_08950	91.37	4.16	0	46559	4243432	35	18	2
Calf_MAG_07418	85.19	7.57	0	4831	4242692	21	14	3
Calf_MAG_08832	93.46	3.68	0	55247	4242360	34	19	2
Calf_MAG_07461	90.34	3.62	0	11062	4240363	24	15	0
Calf_MAG_14099	99.4	9.35	0	34979	4240318	36	20	1
Calf_MAG_21670	92.83	1.25	0	6324	4237086	23	15	1
Calf_MAG_08918	99.92	0.46	0	120368	4235845	37	19	1
Calf_MAG_21631	99.97	1.15	0	15656	4235571	32	18	2
Calf_MAG_08315	97.18	7.83	0	159955	4234781	37	19	1
Calf_MAG_08625	96.41	2.19	0	30089	4234660	27	16	3
Calf_MAG_10323	100	2.91	0	2641059	4234621	44	21	3
Calf_MAG_08378	99.45	5.59	0	60865	4233535	32	19	3
Calf_MAG_08956	99.24	5.87	0	47110	4232908	37	20	1
Calf_MAG_17457	74.18	2.43	0	17248	4232443	32	17	2
Calf_MAG_08584	100	0.01	0	94647	4232399	35	19	2
Calf_MAG_09327	83.54	9.52	0	46828	4231400	32	17	1
Calf_MAG_03661	95.68	1.71	0	27436	4230926	35	19	2
Calf_MAG_08622	80.64	3	0	65084	4230762	33	19	1
Calf_MAG_07442	88.76	0.56	0	8312	4230152	24	17	3
Calf_MAG_07893	95.61	5.82	0	50818	4229628	28	17	1
Calf_MAG_08576	78.55	5.37	0	5218	4225866	24	16	3
Calf_MAG_13727	97.32	2.26	0	97796	4224768	39	19	2
Calf_MAG_08682	96.07	4.96	0	32473	4223732	28	16	2
Calf_MAG_13725	97.2	1.91	0	87381	4222966	38	18	2
Calf_MAG_10427	99.76	3.82	0	1042161	4221336	45	21	3
Calf_MAG_10318	100	3.32	0	2654420	4221206	44	21	3
Calf_MAG_10208	100	5.46	0	1241052	4221064	41	20	3
Calf_MAG_05281	80.43	3.55	0	7839	4217524	30	16	3
Calf_MAG_08958	99.76	0.14	0	165783	4215680	32	19	0
Calf_MAG_21606	90.22	0.33	0	10452	4214665	33	18	3
Calf_MAG_13579	100	1.87	0	637354	4214518	37	20	2
Calf_MAG_09012	58.56	9.1	0	3505	4214252	14	10	0
Calf_MAG_03669	89.4	8.07	0	11369	4214237	22	15	2
Calf_MAG_03559	82.27	5.52	0	4792	4211908	19	13	1
Calf_MAG_04678	75.92	9.91	0	192086	4211863	40	19	3
Calf_MAG_08828	91.56	7.32	0	55566	4211490	35	19	3
Calf_MAG_02362	99.31	8.03	0	238080	4210698	33	20	0
Calf_MAG_07352	94.7	2.85	0	12074	4209840	25	15	2
Calf_MAG_07234	94.64	3.51	0	41661	4208471	37	20	3
Calf_MAG_10309	99.99	6.74	0	228288	4208387	43	21	3
Calf_MAG_16319	84.9	3.03	0	6031	4208195	25	15	0
Calf_MAG_09608	99.64	3.3	0	20760	4205664	38	18	2
Calf_MAG_21565	87.44	0.23	0	9802	4205391	18	12	3
Calf_MAG_07125	99.87	0.25	0	86128	4205164	38	20	3
Calf_MAG_07143	99.84	7.55	0	29589	4204966	40	20	3
Calf_MAG_08648	58.58	8.39	0	6883	4204680	21	17	3
Calf_MAG_08885	90.01	7.4	0	20126	4204635	32	18	2
Calf_MAG_10343	100	4.94	0	4095123	4203862	44	20	3
Calf_MAG_07354	86.9	0.89	0	125814	4203266	36	19	1
Calf_MAG_08581	100	0.01	0	103682	4203011	37	20	3
Calf_MAG_09409	99.95	9.45	0	29128	4202517	35	19	2
Calf_MAG_10945	99.78	3.3	0	2468157	4201842	41	20	3
Calf_MAG_09007	92.2	0.39	0	1050826	4201004	36	19	3
Calf_MAG_07359	99.09	1.31	0	15263	4200479	34	18	2
Calf_MAG_09004	78.93	6.15	0	85197	4200138	36	20	3
Calf_MAG_16414	54.04	5.94	0	7490	4200075	33	20	3
Calf_MAG_20914	98.9	9.47	0	43310	4199681	36	19	1
Calf_MAG_08356	99.15	1.34	0	62717	4199282	33	17	2
Calf_MAG_09066	99.96	8	0	49617	4197874	35	19	1
Calf_MAG_21612	89.55	3.07	0	6277	4196055	28	17	2
Calf_MAG_03571	85.77	2.38	0	21184	4193929	33	17	2
Calf_MAG_07338	83.55	5.84	0	19322	4193654	28	17	2
Calf_MAG_10299	99.99	1.01	0	1017300	4192027	44	21	3
Calf_MAG_09041	62.19	7.69	0	3375	4191080	30	20	1
Calf_MAG_03570	87.38	1.97	0	18951	4190756	32	19	0
Calf_MAG_02515	93.43	4	0	32036	4185926	28	18	3
Calf_MAG_12241	99.37	3.08	0	13917	4185814	27	16	2
Calf_MAG_10949	99.75	3.69	0	2396263	4184605	41	20	3
Calf_MAG_10885	99.9	6.61	0	89129	4183678	38	18	3
Calf_MAG_09424	99.96	3.88	0	29743	4183538	32	19	2
Calf_MAG_04616	99.99	0.77	0	53523	4183451	42	20	3
Calf_MAG_02455	91.15	0.95	0	14893	4183387	31	20	2
Calf_MAG_05285	88.67	2.01	0	25462	4182849	43	20	3
Calf_MAG_08936	98.36	0.61	0	40705	4180410	37	19	1
Calf_MAG_08989	81.17	7.54	0	120600	4180296	31	17	2
Calf_MAG_07439	92.36	1.07	0	11906	4180257	21	14	0
Calf_MAG_09003	84.11	2.22	0	158397	4180251	32	20	3
Calf_MAG_07438	88.84	1.07	0	11886	4179865	19	12	1
Calf_MAG_08681	92.99	8.22	0	64463	4179509	26	17	1
Calf_MAG_13103	99.98	5.87	0	26021	4178919	26	16	2
Calf_MAG_10154	99.97	9.13	0	3514201	4177491	42	20	3
Calf_MAG_16102	99.98	4.3	0	18263	4176983	28	14	0
Calf_MAG_21499	82.12	2.49	0	4016	4176887	20	14	3
Calf_MAG_21633	98.06	1.06	0	12500	4174533	26	16	2
Calf_MAG_03609	89.91	2.49	0	15156	4174165	32	18	1
Calf_MAG_08435	91.4	9.89	0	20811	4173352	34	19	2
Calf_MAG_08871	93.76	5.1	0	20092	4173335	35	18	1
Calf_MAG_10041	95.26	7.11	0	14965	4173192	33	18	2
Calf_MAG_08729	95.35	9.85	0	375244	4173191	41	21	3
Calf_MAG_07299	99.97	0.4	0	92772	4172395	39	19	1
Calf_MAG_10369	99.94	0.2	0	3091346	4170521	41	19	3
Calf_MAG_02352	92.34	8.23	0	11274	4170401	33	20	1
Calf_MAG_12245	94.11	3.93	0	29310	4168584	35	19	0
Calf_MAG_12676	93.81	0.47	0	72830	4168436	39	19	2
Calf_MAG_08124	86.81	5.17	0	28837	4168174	25	18	3
Calf_MAG_13717	81.29	9.55	0	5820	4168053	19	14	1
Calf_MAG_16417	60.09	6.21	0	4071	4168037	31	20	1
Calf_MAG_09406	99.17	4.73	0	26290	4166782	33	17	1
Calf_MAG_07405	90.48	0.58	0	9263	4166394	20	13	2
Calf_MAG_10895	99.89	2.22	0	200770	4166148	39	19	3
Calf_MAG_02501	95.49	4.59	0	6529	4166063	23	18	3
Calf_MAG_08846	87.97	6.06	0	21258	4164863	31	19	3
Calf_MAG_13038	76.18	3.42	0	3921	4162981	8	6	0
Calf_MAG_03568	94.01	7.76	0	6210	4159541	25	14	1
Calf_MAG_14108	99.99	5.04	0	36427	4159446	38	21	1
Calf_MAG_12548	76	8.12	0	6763	4158932	22	12	1
Calf_MAG_10413	99.81	0.14	0	1097829	4158466	45	21	3
Calf_MAG_10330	100	4.98	0	224879	4157650	41	19	0
Calf_MAG_13535	97.59	0.06	0	28637	4156308	30	17	1
Calf_MAG_10407	99.21	7.44	0	25146	4154718	28	15	0
Calf_MAG_10202	99.99	7.67	0	2264100	4154676	41	20	3
Calf_MAG_09771	99.98	2.93	0	78656	4154020	34	18	3
Calf_MAG_04434	90.06	5.85	0	13651	4153996	27	18	3
Calf_MAG_08089	99.58	0.04	0	64160	4153159	36	21	3
Calf_MAG_10287	99.99	4.65	0	143351	4152756	37	17	2
Calf_MAG_15220	99.99	2.69	0	158106	4150622	37	18	1
Calf_MAG_21269	94.86	1.08	0	52954	4149938	39	19	0
Calf_MAG_21456	93.83	0.27	0	13981	4149808	33	18	0
Calf_MAG_07335	83.98	6.53	0	53780	4149652	28	16	0
Calf_MAG_08994	69.54	4.08	0	83632	4149624	26	18	1
Calf_MAG_16322	90.83	1.93	0	10555	4149421	32	16	0
Calf_MAG_10951	99.71	3.45	0	2450088	4149131	41	20	3
Calf_MAG_08063	93.87	0.43	0	68370	4147861	35	20	3
Calf_MAG_11668	100	9.18	0	4024173	4147612	42	20	3
Calf_MAG_07956	99.8	3.66	0	85681	4147572	37	20	3
Calf_MAG_08945	93.37	3.55	0	107479	4147525	36	19	3
Calf_MAG_16292	59.27	3.82	0	2435	4146555	16	14	0
Calf_MAG_10146	99.94	0.57	0	100279	4146532	32	17	3
Calf_MAG_08555	87.96	5.36	0	33832	4146450	31	19	2
Calf_MAG_12266	94.79	1.46	0	36923	4145941	33	18	0
Calf_MAG_08934	94.31	0.38	0	164971	4145288	36	18	2
Calf_MAG_21412	66.24	1.91	0	8284	4144625	16	13	2
Calf_MAG_07315	95.99	0.41	0	64727	4143361	33	19	0
Calf_MAG_09401	99.86	0.94	0	26473	4142038	34	19	1
Calf_MAG_13237	100	9.51	0	74664	4140702	36	18	2
Calf_MAG_21666	90.16	3.71	0	8470	4138616	27	17	2
Calf_MAG_08607	83.18	3	0	63659	4138171	25	19	2
Calf_MAG_18262	96.84	7.69	0	23049	4138031	34	19	0
Calf_MAG_08484	80.25	4.14	0	16542	4137783	31	18	1
Calf_MAG_14114	86.63	6.04	0	6453	4136842	24	16	2
Calf_MAG_07995	94.6	2.73	0	45737	4136618	40	22	1
Calf_MAG_09172	95.07	7.78	0	28451	4136084	40	20	2
Calf_MAG_07254	99.4	1.55	0	65681	4134620	37	19	2
Calf_MAG_10817	99.75	8.32	0	16447	4132084	30	18	3
Calf_MAG_07286	87.54	3.18	0	12126	4131555	27	15	3
Calf_MAG_08786	81.65	9.35	0	47704	4131014	28	16	3
Calf_MAG_10778	95.76	8.01	0	31871	4130888	37	18	1
Calf_MAG_21618	93.23	2.32	0	10628	4129477	33	18	1
Calf_MAG_07387	89.01	0.5	0	8494	4127343	28	18	2
Calf_MAG_08376	99.97	2.55	0	84691	4127241	37	19	2
Calf_MAG_11408	99.15	5.18	0	112283	4126763	34	17	1
Calf_MAG_21650	99.93	0	0	21147	4126509	29	18	1
Calf_MAG_10220	99.98	6.94	0	3987350	4125756	41	20	3
Calf_MAG_16173	97.65	4.96	0	11095	4124852	28	13	3
Calf_MAG_02365	95.83	8.15	0	25027	4120797	28	18	1
Calf_MAG_21472	83.79	2.04	0	3759	4120624	30	16	0
Calf_MAG_08750	99.9	3.61	0	18047	4119362	36	20	0
Calf_MAG_10156	92.91	1.63	0	120077	4119069	36	18	3
Calf_MAG_08912	91.63	1.68	0	24828	4117031	36	19	1
Calf_MAG_16405	100	3.71	0	102219	4115840	40	20	1
Calf_MAG_09700	95.37	8.41	0	23428	4115624	26	18	3
Calf_MAG_09416	98.64	7.23	0	28425	4115396	33	19	2
Calf_MAG_21473	92.62	1.76	0	7796	4115209	35	18	0
Calf_MAG_16326	91.41	2.48	0	140813	4115111	37	18	0
Calf_MAG_21478	99.88	0.06	0	24691	4114769	30	18	0
Calf_MAG_08558	74.53	5.3	0	22651	4113515	25	18	3
Calf_MAG_08665	91.39	8.25	0	42099	4113213	23	16	1
Calf_MAG_15384	96.97	0.67	0	1048368	4112975	41	20	3
Calf_MAG_14090	95.54	8.77	0	35730	4112442	30	18	0
Calf_MAG_15329	91.36	8.54	0	52561	4112129	25	14	0
Calf_MAG_16425	64.82	6.9	0	2775	4110236	15	9	0
Calf_MAG_10148	99.95	4.15	0	2129498	4109860	42	20	3
Calf_MAG_08086	96.25	9.31	0	71001	4108723	34	20	3
Calf_MAG_03651	94.65	5.21	0	15532	4107432	30	17	3
Calf_MAG_07326	99.93	0.22	0	104459	4106611	39	19	2
Calf_MAG_21271	95.1	0.74	0	40274	4106486	38	19	0
Calf_MAG_02364	100	6.89	0	105945	4104902	32	19	2
Calf_MAG_10355	97.35	9.39	0	26479	4103164	38	18	2
Calf_MAG_10325	100	1.06	0	2632446	4103096	44	21	3
Calf_MAG_12244	96.43	2.38	0	21893	4102179	37	21	1
Calf_MAG_19825	98.7	9.27	0	891172	4101655	45	20	3
Calf_MAG_10292	100	4.11	0	151820	4101584	38	18	2
Calf_MAG_08930	86.07	0.28	0	1833276	4101411	38	19	3
Calf_MAG_17890	69.28	1.99	0	3480	4100103	17	11	1
Calf_MAG_10931	99.94	1.82	0	309241	4098322	39	18	3
Calf_MAG_21481	99.29	0	0	20821	4097822	26	17	0
Calf_MAG_08057	99.82	0.02	0	75670	4097473	33	17	2
Calf_MAG_14107	100	6.1	0	51333	4097271	26	15	1
Calf_MAG_07219	98.32	2.25	0	50665	4097170	38	19	1
Calf_MAG_21653	99.29	3.23	0	9284	4096323	18	13	1
Calf_MAG_17851	99.54	2.48	0	24999	4095813	44	21	3
Calf_MAG_03638	93.67	0.68	0	14425	4094915	31	18	2
Calf_MAG_07310	99.6	0.94	0	62478	4094290	30	19	0
Calf_MAG_21460	89.03	1.13	0	12820	4092925	28	16	0
Calf_MAG_09052	99.89	3.86	0	88033	4092906	33	18	2
Calf_MAG_10586	99.82	0.15	0	2419949	4092892	41	20	3
Calf_MAG_08129	92.64	1.78	0	122729	4092560	34	19	2
Calf_MAG_08034	99.79	4.46	0	65481	4090793	35	19	2
Calf_MAG_10622	97.76	2.56	0	50583	4090139	24	12	1
Calf_MAG_09779	99.88	4.62	0	9501	4090093	15	10	0
Calf_MAG_07250	50.56	7.24	0	13654	4089953	22	15	1
Calf_MAG_10783	99.95	8.71	0	487816	4089895	42	20	3
Calf_MAG_03565	86.85	2.25	0	19078	4088771	30	17	1
Calf_MAG_10349	98.89	0.8	1	4088261	4088261	44	20	3
Calf_MAG_03624	88.85	1.56	0	17034	4085442	30	18	3
Calf_MAG_10335	100	0.61	0	2941785	4084773	44	20	3
Calf_MAG_06787	94.38	3.55	0	13368	4083064	39	20	3
Calf_MAG_08867	86.9	1.05	0	21249	4082784	34	20	3
Calf_MAG_12674	99.26	0.68	0	58356	4082279	31	17	0
Calf_MAG_10793	99.97	0.54	0	1023040	4081821	43	20	3
Calf_MAG_08864	85.7	2.11	0	25140	4081454	32	19	3
Calf_MAG_21468	95.56	0.15	0	13631	4081042	30	17	0
Calf_MAG_08585	94.6	0	0	71894	4081037	25	16	2
Calf_MAG_06402	98.68	2.41	0	36154	4079537	32	19	0
Calf_MAG_08948	73.91	9.67	0	38225	4078995	29	15	3
Calf_MAG_10585	99.9	0.38	0	2427396	4078214	40	20	3
Calf_MAG_09741	99.98	7.89	0	49438	4077838	35	18	3
Calf_MAG_10201	99.99	5.66	0	3999563	4077243	42	20	3
Calf_MAG_09426	99.81	9.33	0	32626	4076522	37	19	2
Calf_MAG_08863	94.37	0.48	0	108640	4074335	35	19	1
Calf_MAG_16324	89.56	4.93	0	4901	4073399	24	15	0
Calf_MAG_21551	80.57	3.81	0	3858	4073344	15	10	3
Calf_MAG_08833	96.2	0.39	0	55566	4073326	37	20	1
Calf_MAG_10380	99.61	6.44	0	96053	4072408	40	18	2
Calf_MAG_08829	84.93	6.69	0	48676	4071702	30	18	2
Calf_MAG_16274	75.6	5.41	0	3070	4069568	35	18	1
Calf_MAG_14640	93.75	1.14	0	678440	4068965	37	17	0
Calf_MAG_20009	99.49	9.66	0	35338	4068080	36	18	2
Calf_MAG_10820	99.99	0.64	0	55200	4066262	40	19	2
Calf_MAG_09147	100	5.19	0	56925	4066162	36	18	1
Calf_MAG_08187	99.98	1.39	0	58524	4065531	37	19	3
Calf_MAG_07437	92.4	0.1	0	35296	4065160	20	12	0
Calf_MAG_10579	99.91	5.5	0	23022	4064352	38	18	1
Calf_MAG_08036	94.21	4.54	0	58132	4063335	35	20	1
Calf_MAG_07324	99.96	2.34	0	27786	4063048	38	19	1
Calf_MAG_10797	99.73	3.96	0	81664	4062468	37	18	2
Calf_MAG_07263	90.99	2.3	0	22374	4061203	35	19	0
Calf_MAG_08957	99.98	0.44	0	169918	4060945	37	19	1
Calf_MAG_10207	99.97	2.46	0	2340947	4060531	41	20	3
Calf_MAG_12272	92	2.13	0	14736	4059176	33	19	2
Calf_MAG_07404	95.78	1.99	0	14862	4058889	27	17	3
Calf_MAG_09141	99.92	9.61	0	73659	4058785	36	19	3
Calf_MAG_07296	99.99	3.24	0	85607	4057811	39	19	1
Calf_MAG_10147	98.24	6.61	0	3873086	4057805	42	20	3
Calf_MAG_08915	94.84	0.75	0	87767	4056678	35	19	1
Calf_MAG_10881	99.78	4.77	0	61435	4056365	39	19	3
Calf_MAG_10328	100	1.18	0	446917	4055979	42	20	2
Calf_MAG_02392	94.92	3.84	0	14452	4055373	23	13	1
Calf_MAG_21476	92.06	2.04	0	9068	4054382	29	17	0
Calf_MAG_11754	92.31	3.48	0	75666	4053731	36	20	1
Calf_MAG_11768	93.92	3.37	0	160060	4053567	42	20	1
Calf_MAG_13490	69.66	7.96	0	79627	4052471	39	19	3
Calf_MAG_16288	69.29	4.22	0	2366	4052443	21	12	0
Calf_MAG_10312	100	0.99	0	878732	4051890	44	21	3
Calf_MAG_07463	88.55	1.55	0	12726	4051711	34	17	1
Calf_MAG_11761	88.56	8.13	0	5009	4051492	26	15	3
Calf_MAG_08081	95.02	8.27	0	64160	4050855	36	19	3
Calf_MAG_22069	95.54	2.36	0	24609	4049760	35	19	2
Calf_MAG_09602	83.61	9.19	0	14321	4049739	38	20	3
Calf_MAG_10324	100	1.14	0	2653187	4049471	44	21	3
Calf_MAG_07349	89.25	1.04	0	14210	4048902	34	17	2
Calf_MAG_08440	79.86	3.67	0	142517	4048894	26	17	3
Calf_MAG_19830	93.51	9.44	0	23824	4048231	41	19	2
Calf_MAG_08126	76.71	6.59	0	25199	4046763	35	20	2
Calf_MAG_10771	99.58	5.41	0	775099	4046683	42	20	3
Calf_MAG_05553	99.99	2.26	0	244439	4045688	37	19	3
Calf_MAG_07197	81.76	5.8	0	6522	4044474	28	16	1
Calf_MAG_08689	96.21	0.93	0	36362	4043417	19	12	1
Calf_MAG_21624	89.83	0.37	0	7567	4043272	23	15	1
Calf_MAG_13083	59.95	9.81	0	2767	4043241	13	9	0
Calf_MAG_00290	97.62	9.37	0	334883	4042789	35	21	3
Calf_MAG_08185	99.4	1.28	0	2782778	4042332	39	20	3
Calf_MAG_03600	91.38	0.98	0	12496	4042224	28	17	0
Calf_MAG_02381	98.63	5.52	0	26825	4041626	23	13	0
Calf_MAG_03576	85.54	0.85	0	19054	4040599	29	17	1
Calf_MAG_21669	92.98	2.06	0	5842	4040376	22	13	2
Calf_MAG_08904	91.5	1.77	0	43163	4038970	36	18	1
Calf_MAG_09391	83.95	9.09	0	21530	4038102	27	16	1
Calf_MAG_21443	88.79	0.49	0	7138	4038095	19	12	0
Calf_MAG_19818	97.76	5.27	0	2105800	4038052	45	20	3
Calf_MAG_13596	100	4.84	0	88161	4037025	24	17	2
Calf_MAG_07327	93.29	1.66	0	14623	4036610	31	19	2
Calf_MAG_07301	83.3	4.06	0	248048	4036546	38	19	3
Calf_MAG_19843	98.63	3.88	0	927583	4035916	45	20	3
Calf_MAG_12677	95.9	0.08	0	79752	4034706	36	19	1
Calf_MAG_07319	99.94	5.57	0	110520	4034071	39	19	1
Calf_MAG_10879	99.97	2.85	0	128719	4033533	39	18	3
Calf_MAG_08562	76.76	8.01	0	51714	4033497	27	19	3
Calf_MAG_19686	97.65	4.84	0	34592	4033129	34	19	1
Calf_MAG_09181	99.76	5.47	0	36773	4030602	37	19	1
Calf_MAG_21524	93.25	1	0	8390	4029201	30	18	0
Calf_MAG_08935	90.3	2.15	0	14010	4027115	31	18	1
Calf_MAG_08336	99.77	0.43	0	68893	4027105	37	19	1
Calf_MAG_08852	88.73	7.89	0	15864	4026745	34	19	1
Calf_MAG_13605	100	6.3	0	24436	4025685	22	16	2
Calf_MAG_09934	99.97	5.51	0	47130	4025227	35	18	1
Calf_MAG_05260	99.96	2.57	0	48454	4022228	42	18	0
Calf_MAG_16325	81.47	3.12	0	5335	4021114	25	17	0
Calf_MAG_08887	94.07	0.24	0	82670	4019709	32	19	1
Calf_MAG_08088	91.38	8.22	0	87054	4019367	32	18	1
Calf_MAG_03666	89.07	2.61	0	21405	4018351	27	17	3
Calf_MAG_07311	84.47	9.05	0	85172	4017277	39	20	3
Calf_MAG_03599	90.29	3.05	0	10854	4017253	27	18	1
Calf_MAG_10638	99	4.74	0	3717262	4016719	40	20	3
Calf_MAG_15028	99.2	9.04	0	13418	4015257	30	17	2
Calf_MAG_08715	95.13	2.68	0	33425	4014812	29	16	3
Calf_MAG_02354	100	5.06	0	77313	4014472	33	20	2
Calf_MAG_21621	93.13	1.25	0	10627	4013501	35	17	2
Calf_MAG_08673	89.54	4.97	0	31202	4013240	31	20	1
Calf_MAG_06410	95.07	5.16	0	17910	4012689	25	15	0
Calf_MAG_08323	89.22	4.09	0	26008	4012646	30	20	3
Calf_MAG_09051	99.99	1.3	0	84743	4012536	36	18	2
Calf_MAG_08960	93.11	5.34	0	33526	4011584	29	20	3
Calf_MAG_09469	99.95	2.14	0	2848031	4009705	40	20	3
Calf_MAG_10580	96.66	6.14	0	23160	4009180	34	17	3
Calf_MAG_08666	82.64	5.14	0	61645	4009068	38	20	1
Calf_MAG_10378	94.67	0.39	0	1143999	4008464	41	20	3
Calf_MAG_09071	99.74	3.45	0	41175	4007180	37	20	3
Calf_MAG_05252	95.66	6.45	0	128766	4005813	34	18	3
Calf_MAG_07291	85.35	4.79	0	82924	4005547	35	19	1
Calf_MAG_10929	99.94	4.95	0	90430	4005409	33	16	3
Calf_MAG_10219	99.98	5.84	0	3844819	4003824	42	20	3
Calf_MAG_21572	84.7	3.1	0	5081	4002769	23	14	2
Calf_MAG_08856	88.46	3.76	0	85386	4000942	31	19	1
Calf_MAG_03637	90.37	1.74	0	4511	4000721	18	9	2
Calf_MAG_13479	99.81	3.64	0	18386	4000397	34	18	2
Calf_MAG_10216	99.63	1.98	1	3999563	3999563	41	20	3
Calf_MAG_10578	97.39	3.75	0	25342	3999112	32	17	0
Calf_MAG_00246	99.84	0.31	0	443957	3998902	35	21	3
Calf_MAG_02517	99.96	5.59	0	12676	3998842	25	15	3
Calf_MAG_13998	95.76	7.68	0	12251	3998282	31	15	1
Calf_MAG_07385	81.92	2.09	0	5186	3998092	10	10	1
Calf_MAG_00271	100	1.53	0	182479	3997735	33	20	0
Calf_MAG_10824	99.6	2.36	0	23519	3996970	34	18	2
Calf_MAG_09074	99.95	0.59	0	66806	3996354	36	20	3
Calf_MAG_07358	86.01	1.35	0	6522	3996080	16	11	2
Calf_MAG_10769	91.86	7.46	0	12078	3995877	28	15	1
Calf_MAG_20827	91.91	8.93	0	6186	3993562	25	16	1
Calf_MAG_21422	93.47	0.58	0	12661	3993449	30	17	0
Calf_MAG_10762	89.01	1.88	0	390637	3993018	39	20	3
Calf_MAG_10157	95.09	5.44	0	148897	3992606	31	18	1
Calf_MAG_08802	83.88	0.3	0	95141	3990695	30	17	3
Calf_MAG_17922	58.75	2.07	0	5755	3990052	22	16	0
Calf_MAG_11760	91.73	4.33	0	20757	3989742	43	21	1
Calf_MAG_16422	58.97	1.1	0	3350	3988894	26	17	3
Calf_MAG_21630	92.18	1.05	0	6057	3988415	26	16	1
Calf_MAG_09069	96.18	1.12	0	120404	3988054	34	17	2
Calf_MAG_10215	99.63	0.74	1	3987350	3987350	41	20	3
Calf_MAG_08333	92.36	0.69	0	54312	3985867	38	21	3
Calf_MAG_04432	98.49	2.94	0	16081	3985700	20	13	2
Calf_MAG_04431	100	1.44	0	57928	3984656	26	16	2
Calf_MAG_08654	91.33	6.77	0	55432	3984044	27	16	2
Calf_MAG_10338	99.99	0.86	0	2508357	3983746	44	20	3
Calf_MAG_07864	100	4.48	0	161251	3983569	39	20	1
Calf_MAG_21276	94.73	1.14	0	30773	3983367	35	18	1
Calf_MAG_07199	91.63	2.78	0	16861	3983016	37	19	2
Calf_MAG_08353	99.2	0.86	0	64544	3980591	37	20	3
Calf_MAG_13539	81.08	4.42	0	7371	3979842	27	15	2
Calf_MAG_02518	93.56	4.75	0	169096	3979473	28	18	2
Calf_MAG_10221	99.99	0.94	0	3979394	3979394	41	20	3
Calf_MAG_07314	99.79	0.33	0	89813	3978107	39	19	1
Calf_MAG_08685	86.62	5.21	0	36741	3976263	30	18	1
Calf_MAG_17901	60.35	3.42	0	2825	3975875	18	13	2
Calf_MAG_10339	100	2.81	0	2363444	3975029	44	20	3
Calf_MAG_08742	87.04	1.24	0	37358	3974262	30	19	2
Calf_MAG_12738	95.71	9.72	0	27018	3971362	28	14	0
Calf_MAG_10342	100	0.56	0	2929995	3970610	44	20	3
Calf_MAG_10319	100	0.95	0	2627133	3970434	44	21	3
Calf_MAG_10382	99.9	3.77	0	90081	3970411	33	18	2
Calf_MAG_11044	99.99	6.36	0	32521	3970014	37	18	2
Calf_MAG_08597	83.71	9.09	0	45267	3969026	24	16	2
Calf_MAG_09063	96.62	3.56	0	137955	3967961	36	19	1
Calf_MAG_07173	93.65	0.71	0	67195	3967467	38	20	3
Calf_MAG_10581	98.29	7.99	0	17092	3966936	38	19	1
Calf_MAG_09470	99.96	0.93	0	1112476	3966299	40	20	3
Calf_MAG_07188	97.86	0.03	0	733980	3966133	40	20	3
Calf_MAG_03670	87.17	2.87	0	15215	3965151	28	18	0
Calf_MAG_21518	97.78	3.18	0	8078	3965041	24	15	1
Calf_MAG_08775	99.98	1.17	0	17739	3965014	32	19	0
Calf_MAG_10908	99.94	1.19	0	247215	3963830	38	19	3
Calf_MAG_08023	95.79	9.8	0	60837	3962929	37	19	1
Calf_MAG_08714	78.16	6.58	0	161284	3962597	26	19	3
Calf_MAG_09402	99.81	4.86	0	28639	3962070	34	18	2
Calf_MAG_07312	81.38	5.15	0	202156	3961660	38	18	3
Calf_MAG_16327	90.52	1.63	0	15592	3961586	37	19	0
Calf_MAG_08905	94.6	1.07	0	144883	3959479	34	19	1
Calf_MAG_10316	100	0.85	0	203228	3959475	40	19	3
Calf_MAG_10595	99.99	4.35	0	21567	3958784	38	18	2
Calf_MAG_15402	99.86	1.94	0	3006458	3958749	41	20	3
Calf_MAG_12934	100	4.38	0	35637	3958669	35	19	2
Calf_MAG_14003	99.75	3.42	0	19692	3957977	32	18	1
Calf_MAG_08889	87.6	9.05	0	36862	3954371	34	19	2
Calf_MAG_21616	79.45	7.27	0	4450	3953790	18	13	3
Calf_MAG_09053	99.6	0.86	0	88056	3953775	34	18	2
Calf_MAG_03612	89.22	3.25	0	10638	3953432	25	14	3
Calf_MAG_02519	89.85	6.55	0	18840	3953103	29	18	3
Calf_MAG_21517	82.11	2.93	0	4748	3951881	15	11	1
Calf_MAG_21413	61.79	0.98	0	12389	3950475	21	15	3
Calf_MAG_08105	95.03	0.16	0	67097	3949960	34	20	1
Calf_MAG_10614	99.87	4.2	0	3747633	3949769	40	20	3
Calf_MAG_08910	89.19	2.77	0	19250	3949153	34	17	1
Calf_MAG_12550	87.9	3.33	0	8186	3947591	24	15	1
Calf_MAG_07160	99.58	0.86	0	73298	3947495	40	20	2
Calf_MAG_08183	99.83	1.12	0	2633966	3947222	39	20	3
Calf_MAG_07768	99.98	3.77	0	512008	3945995	41	21	3
Calf_MAG_10308	99.99	1.49	0	303826	3945243	41	20	0
Calf_MAG_21523	87.38	1.51	0	6596	3944243	29	18	0
Calf_MAG_06135	95.71	4.16	0	45892	3944015	36	20	3
Calf_MAG_10350	100	0.44	0	2927951	3943025	44	20	3
Calf_MAG_10792	99.07	0.77	0	2119680	3942835	42	20	3
Calf_MAG_10212	99.97	0.52	0	173316	3942650	38	17	3
Calf_MAG_07123	93.06	8.15	0	6730	3941897	25	16	1
Calf_MAG_08920	90.42	4.42	0	13921	3940910	33	20	1
Calf_MAG_07302	87.77	0.23	0	382197	3940675	41	20	3
Calf_MAG_10143	99.96	1.46	0	3920337	3939748	42	20	3
Calf_MAG_13730	75.29	3.19	0	159101	3939497	39	20	3
Calf_MAG_03677	93.78	2.74	0	6762	3939280	24	15	2
Calf_MAG_19391	100	4.78	0	63785	3937063	45	22	2
Calf_MAG_10916	99.9	1.67	0	73187	3935829	41	20	2
Calf_MAG_08838	92.89	0.28	0	157764	3935468	35	19	1
Calf_MAG_10159	99.97	0.58	0	2757520	3935073	42	20	3
Calf_MAG_10600	99.55	2.61	0	21070	3934254	38	18	2
Calf_MAG_10800	95.52	4.22	0	50854	3933551	40	20	2
Calf_MAG_08316	58.65	9.05	0	40012	3933442	26	17	2
Calf_MAG_08346	95.02	4.22	0	57177	3932623	36	19	2
Calf_MAG_03662	88.84	2.69	0	22382	3931716	31	18	2
Calf_MAG_09058	93.39	1.61	0	167451	3931334	29	18	1
Calf_MAG_06644	99.99	3.3	0	134687	3928489	38	18	1
Calf_MAG_12924	100	9.43	0	42855	3928441	32	17	1
Calf_MAG_08941	80.14	2.27	0	448820	3928365	35	20	3
Calf_MAG_13589	95.82	8.68	0	31735	3925980	19	14	1
Calf_MAG_10833	96.81	4.76	0	31739	3925341	26	16	0
Calf_MAG_10149	99.96	0.16	0	3288307	3924994	42	20	3
Calf_MAG_08674	95.21	8.09	0	71979	3924187	32	18	1
Calf_MAG_10307	99.76	5.36	0	203228	3923327	37	19	3
Calf_MAG_10912	93.18	6.85	0	2179228	3922654	40	20	3
Calf_MAG_09032	61.98	1.49	0	12473	3922353	23	15	1
Calf_MAG_08008	73.05	9.26	0	9984	3922176	17	13	0
Calf_MAG_08522	77.04	2.82	0	5369	3922084	26	15	1
Calf_MAG_09415	99.95	2.5	0	32615	3920883	35	19	3
Calf_MAG_16620	96.37	3.55	0	583498	3920070	41	19	0
Calf_MAG_10218	99.98	0.7	0	166510	3920019	38	20	3
Calf_MAG_15392	85.61	4.8	0	241125	3919489	35	19	3
Calf_MAG_09429	98.76	6.85	0	28572	3918837	34	18	1
Calf_MAG_10344	99.99	0.43	0	2906204	3918548	44	20	3
Calf_MAG_08812	75.94	8.57	0	14274	3918062	28	17	3
Calf_MAG_08692	87.3	0.34	0	560678	3916852	36	20	3
Calf_MAG_10897	99.86	1.64	0	101162	3915163	34	17	3
Calf_MAG_08656	95.85	0.2	0	64990	3913751	24	17	1
Calf_MAG_10317	100	0.8	0	212103	3913638	41	20	1
Calf_MAG_15382	98.97	3.33	0	28362	3913386	34	19	1
Calf_MAG_08932	80.35	0.54	0	93278	3912847	18	14	2
Calf_MAG_10137	99.88	7.55	0	1062748	3912107	42	20	3
Calf_MAG_19364	99.99	8.99	0	72866	3911475	44	21	1
Calf_MAG_08054	98.7	0	0	110060	3911019	38	18	3
Calf_MAG_03619	92.87	1.14	0	12296	3910851	33	19	2
Calf_MAG_17912	66	2.45	0	2278	3910848	26	17	0
Calf_MAG_10261	99.95	3.49	0	271787	3910554	38	18	1
Calf_MAG_09749	99.96	4.55	0	38682	3909949	34	17	2
Calf_MAG_10884	99.46	1.7	0	74398	3909883	39	19	2
Calf_MAG_12254	92.42	1.29	0	11180	3909745	32	19	2
Calf_MAG_07736	99.98	2.84	0	170033	3909567	38	19	3
Calf_MAG_08332	98.92	2.91	0	62191	3909544	39	20	3
Calf_MAG_10882	99.95	1.17	0	133356	3907518	40	19	2
Calf_MAG_03653	90.17	1.92	0	23387	3907213	33	18	2
Calf_MAG_08011	99.75	7.57	0	78414	3906720	39	19	3
Calf_MAG_21651	87.61	0.94	0	11097	3906462	29	18	0
Calf_MAG_09676	98.26	6.43	0	32188	3906151	29	16	3
Calf_MAG_19396	99.99	8.09	0	27695	3905999	36	19	3
Calf_MAG_08074	88.82	7.89	0	66494	3905947	34	18	3
Calf_MAG_09411	99.87	2.73	0	29238	3905452	37	20	1
Calf_MAG_08636	90.04	2.19	0	19089	3905268	28	19	3
Calf_MAG_11397	100	5.08	0	52958	3904466	39	19	2
Calf_MAG_21381	100	1.09	0	24727	3903463	33	18	2
Calf_MAG_08511	76.61	5.51	0	25352	3901372	28	17	1
Calf_MAG_19814	98.35	4.32	0	3176488	3900879	45	20	3
Calf_MAG_11759	89.87	3.6	0	19758	3900256	41	21	3
Calf_MAG_11764	93.73	2.59	0	98944	3900095	42	20	3
Calf_MAG_08516	77.04	1.68	0	203836	3898385	31	19	1
Calf_MAG_10300	96.04	1.27	0	13437	3898027	38	20	3
Calf_MAG_11772	91.81	2.36	0	135910	3897999	41	20	1
Calf_MAG_08835	94.65	1.72	0	76574	3897798	35	21	3
Calf_MAG_20636	93.67	6.72	0	17401	3897761	37	20	2
Calf_MAG_11767	94.56	2.79	0	91839	3895774	37	20	3
Calf_MAG_04830	77.96	9.45	0	72804	3895115	39	19	1
Calf_MAG_10193	99.98	3.8	0	219773	3894560	32	18	0
Calf_MAG_10326	99.99	0.77	0	453882	3893330	39	19	1
Calf_MAG_10639	99.91	2.3	0	3469713	3892234	40	20	3
Calf_MAG_03589	81.81	4.73	0	110991	3891539	37	19	3
Calf_MAG_21378	99.96	2.7	0	27920	3889804	28	19	2
Calf_MAG_21380	100	2.17	0	22967	3888741	34	19	1
Calf_MAG_12058	96.19	9.12	0	16966	3888415	34	18	3
Calf_MAG_02689	100	1.77	0	45944	3888269	26	17	3
Calf_MAG_03644	80.87	6.05	0	22231	3888063	32	17	2
Calf_MAG_21673	75.88	7.34	0	4234	3887142	13	10	3
Calf_MAG_03665	86.82	2.68	0	20919	3887037	30	17	2
Calf_MAG_02462	100	0.64	0	85041	3886378	28	19	1
Calf_MAG_09112	98.94	2.47	0	47312	3886024	37	19	3
Calf_MAG_07313	85.69	3	0	52994	3885718	25	16	0
Calf_MAG_08338	94.56	5.85	0	59057	3885511	36	19	1
Calf_MAG_11883	97.23	4.95	0	209866	3885482	37	20	3
Calf_MAG_10889	98.66	4.76	0	29478	3884708	39	19	2
Calf_MAG_19834	98.35	4.27	0	1138993	3883493	44	20	3
Calf_MAG_13752	96.43	4.28	0	87046	3881255	27	17	0
Calf_MAG_19817	98.35	5.49	0	1141431	3880652	44	20	3
Calf_MAG_02661	99.95	1.43	0	917115	3880634	38	20	3
Calf_MAG_06643	99.98	0.86	0	141175	3879539	39	19	1
Calf_MAG_02628	95.66	3.69	0	15250	3879030	28	21	3
Calf_MAG_22070	96.54	1.13	0	37015	3878565	34	17	2
Calf_MAG_08080	91.99	3.79	0	82678	3878368	30	19	3
Calf_MAG_10155	90.65	4.89	0	96986	3877878	31	16	2
Calf_MAG_07859	99.9	3.53	0	347748	3877542	36	19	1
Calf_MAG_14091	91.62	9.12	0	34561	3877134	26	14	1
Calf_MAG_08669	96.01	3.88	0	73739	3876759	34	19	1
Calf_MAG_21497	92.03	1.08	0	6739	3875473	25	16	1
Calf_MAG_05008	88.58	9.43	0	122048	3875425	28	19	3
Calf_MAG_07290	80.66	2.75	0	64761	3874782	35	20	3
Calf_MAG_04429	99.27	1.61	0	39114	3873906	23	14	2
Calf_MAG_10394	99.86	0.08	0	104297	3872485	37	17	0
Calf_MAG_13590	72.75	9.23	0	97884	3872154	14	12	2
Calf_MAG_20788	96.36	6.78	0	10603	3870945	29	17	2
Calf_MAG_07375	79.47	4.28	0	5410	3869206	20	14	1
Calf_MAG_16628	96.34	2.22	0	583640	3869094	41	19	1
Calf_MAG_13570	99.91	2.66	0	315767	3868619	38	20	2
Calf_MAG_10385	99.51	0.09	0	110527	3868534	36	16	2
Calf_MAG_21764	96.7	2.51	0	45398	3868128	43	20	1
Calf_MAG_19844	96	4.15	0	873986	3868007	45	20	3
Calf_MAG_05253	99.86	1.31	0	89103	3867177	43	19	2
Calf_MAG_21532	89.34	1.73	0	6618	3866935	25	16	2
Calf_MAG_15395	99.92	0.53	0	427461	3866819	41	20	3
Calf_MAG_08943	81.89	1.74	0	64278	3866480	30	18	2
Calf_MAG_09070	99.77	0.81	0	38716	3866161	36	18	1
Calf_MAG_10629	99.18	1.23	0	412097	3866156	40	20	3
Calf_MAG_13585	100	1.3	0	1320285	3865043	37	20	2
Calf_MAG_08839	87.81	0.42	0	90131	3863137	30	19	3
Calf_MAG_12953	99.73	3.59	0	18339	3863035	27	16	0
Calf_MAG_21277	94.08	0.7	0	34716	3860242	39	20	1
Calf_MAG_19078	85.9	5.73	0	9133	3859044	18	12	0
Calf_MAG_07051	97.99	0.56	0	45174	3857180	38	19	2
Calf_MAG_07052	97.96	0.03	0	100293	3855092	38	19	1
Calf_MAG_06329	75.81	8.4	0	22314	3855031	24	14	1
Calf_MAG_07292	83.3	5.04	0	19662	3854531	38	20	1
Calf_MAG_02511	96.28	1.42	0	95689	3853522	26	18	3
Calf_MAG_10191	99.97	0.64	0	187296	3853230	34	17	0
Calf_MAG_03566	92.7	5.46	0	6940	3851719	23	16	2
Calf_MAG_10204	99.97	0.68	0	184380	3851321	36	16	0
Calf_MAG_03654	86.54	2.33	0	24235	3851066	25	16	3
Calf_MAG_07962	99.38	5.8	0	41929	3851002	31	17	3
Calf_MAG_13735	95.78	2.2	0	72974	3850530	32	17	1
Calf_MAG_08680	99.96	0	0	102690	3849924	34	19	1
Calf_MAG_14098	100	9.68	0	48672	3849853	32	19	0
Calf_MAG_20883	93.7	9.59	0	9130	3849045	25	14	2
Calf_MAG_08142	57.76	3.98	0	28360	3848712	23	17	1
Calf_MAG_10779	98.75	9.3	0	35502	3846966	37	17	0
Calf_MAG_00269	99.98	0.35	0	146250	3846901	33	20	1
Calf_MAG_07142	99.47	2.36	0	143197	3846682	38	19	2
Calf_MAG_07266	95.08	4.98	0	17325	3846402	31	18	1
Calf_MAG_08644	60.46	9.86	0	25959	3845753	25	18	2
Calf_MAG_07297	85.17	0.27	0	114453	3845113	34	19	0
Calf_MAG_10370	99.77	0.21	0	101729	3845061	39	18	2
Calf_MAG_08926	92.03	1.33	0	16993	3844912	31	19	1
Calf_MAG_00272	99.88	0.27	0	177769	3844775	33	20	1
Calf_MAG_21707	97.1	8.73	0	163228	3842940	41	20	3
Calf_MAG_09733	99.97	0.96	0	22817	3842691	37	20	3
Calf_MAG_10205	99.94	3.84	0	104349	3840668	38	18	2
Calf_MAG_13558	99.99	5.44	0	833000	3839993	38	20	2
Calf_MAG_12572	99.19	5.85	0	37189	3839370	27	16	2
Calf_MAG_09061	99.7	1.3	0	68492	3839057	36	18	3
Calf_MAG_21379	99.99	1.94	0	20525	3836888	29	17	2
Calf_MAG_13545	97.89	0.68	0	64760	3836859	31	19	0
Calf_MAG_10210	99.96	1.5	0	138944	3836701	38	18	2
Calf_MAG_09776	99.24	7.89	0	35092	3836477	35	18	3
Calf_MAG_08851	90.39	5.48	0	33427	3834915	35	19	1
Calf_MAG_08868	93.43	0.17	0	65245	3834646	33	19	1
Calf_MAG_10909	99.47	5.05	0	89299	3834584	40	19	1
Calf_MAG_13886	99.79	9.09	0	355766	3834400	37	21	3
Calf_MAG_07360	80.83	0.49	0	5408	3832944	17	11	1
Calf_MAG_07308	91.13	0.11	0	63249	3831996	34	19	1
Calf_MAG_12242	91.65	4.22	0	28184	3831716	32	17	1
Calf_MAG_12273	90.75	2.9	0	5967	3830852	10	9	2
Calf_MAG_08664	96.81	0.45	0	59111	3830580	36	20	1
Calf_MAG_20941	93.79	5.69	0	20408	3830322	30	17	0
Calf_MAG_12565	99.76	2.76	0	37978	3828116	37	20	3
Calf_MAG_07971	92.06	3.92	0	26543	3827476	28	19	3
Calf_MAG_07174	99.45	0	0	101104	3827231	39	20	2
Calf_MAG_07332	86.3	1.43	0	94392	3826872	37	18	1
Calf_MAG_12436	98.01	9.18	0	62065	3826483	24	14	2
Calf_MAG_14076	93.49	7.96	0	11207	3826091	26	13	2
Calf_MAG_08713	78.23	8.23	0	39990	3825951	26	16	2
Calf_MAG_08340	92.56	7.86	0	54312	3825266	39	20	1
Calf_MAG_12954	99.99	5.37	0	19253	3824971	31	17	1
Calf_MAG_10890	99.6	1.63	0	34607	3824675	36	17	1
Calf_MAG_11769	94.14	2.78	0	79242	3824156	40	20	3
Calf_MAG_03642	91.89	1.66	0	11688	3823653	27	17	1
Calf_MAG_13997	99.97	0.15	0	93595	3823602	35	19	1
Calf_MAG_13242	95.21	5.04	0	18049	3823223	35	18	2
Calf_MAG_09386	85.02	7.92	0	25768	3822984	31	20	3
Calf_MAG_14013	92.63	6.38	0	6477	3822615	26	16	3
Calf_MAG_12249	83.6	5.47	0	3996	3822569	20	15	3
Calf_MAG_14097	92.43	7.31	0	35495	3822294	29	18	1
Calf_MAG_08488	89.25	5.42	0	4732	3822139	22	16	1
Calf_MAG_08870	80.61	4.13	0	17909	3821900	22	14	3
Calf_MAG_07858	99.91	0.28	0	141915	3821482	34	18	2
Calf_MAG_11771	94.37	2.8	0	99004	3819796	36	19	3
Calf_MAG_08345	94.37	5.19	0	60862	3819792	38	19	1
Calf_MAG_21158	94.03	2.43	0	24752	3819629	28	17	2
Calf_MAG_10390	99.82	6.03	0	104297	3819166	34	16	0
Calf_MAG_10363	99.94	0.5	0	102586	3818044	38	18	2
Calf_MAG_00268	100	0.4	0	195659	3817711	31	19	3
Calf_MAG_00308	99.99	0.24	0	195659	3817468	33	20	0
Calf_MAG_09002	82.79	0.73	0	36032	3816990	23	14	0
Calf_MAG_15385	99.56	5.11	0	360871	3816929	35	16	1
Calf_MAG_02401	99.75	4.58	0	108250	3816897	28	17	2
Calf_MAG_02484	99.97	2.62	0	9115	3816839	27	19	3
Calf_MAG_00296	100	0.23	0	195659	3816004	32	21	3
Calf_MAG_21275	94.63	0.56	0	42259	3814888	37	19	1
Calf_MAG_06506	99.97	2.91	0	145487	3813250	32	19	2
Calf_MAG_21628	83.37	0.73	0	5104	3813001	18	14	2
Calf_MAG_08659	98.93	5.11	0	27955	3812773	37	20	3
Calf_MAG_08531	73.74	0.04	0	88110	3812114	26	18	0
Calf_MAG_06756	99.94	1.74	0	19120	3811702	34	18	3
Calf_MAG_00259	99.99	0.22	0	1959219	3811489	33	20	1
Calf_MAG_21639	87.11	0.99	0	6187	3811416	23	16	1
Calf_MAG_09956	99.97	4.73	0	19148	3810742	32	18	3
Calf_MAG_02361	98.5	4.94	0	50729	3810467	28	16	2
Calf_MAG_09015	59.5	2.17	0	55307	3809564	19	17	1
Calf_MAG_14159	80.19	6.81	0	19864	3808844	31	20	1
Calf_MAG_21250	98.01	4.63	0	3770107	3807562	45	21	3
Calf_MAG_10190	99.97	0.62	0	168342	3806603	38	18	2
Calf_MAG_15378	95.06	5.96	0	44110	3806172	32	17	1
Calf_MAG_02380	96.37	4.99	0	123215	3806057	27	17	1
Calf_MAG_10310	89.66	0.55	0	2701835	3805776	43	21	3
Calf_MAG_00291	99.96	0.31	0	526448	3805654	35	21	3
Calf_MAG_08182	94.1	3.29	0	61613	3805471	27	16	1
Calf_MAG_08417	99.39	0.93	0	194076	3805106	36	19	3
Calf_MAG_07272	91.99	4.5	0	16946	3804745	36	19	1
Calf_MAG_09045	99.51	0.89	0	71252	3804564	32	18	1
Calf_MAG_00281	99.99	0.27	0	1958300	3804427	33	20	1
Calf_MAG_12661	97.21	8.11	0	59366	3803482	37	17	2
Calf_MAG_10392	99.65	0.08	0	93861	3803245	37	17	2
Calf_MAG_07289	92.06	3.6	0	56941	3802220	37	19	2
Calf_MAG_21541	84.2	1.26	0	7391	3801778	27	18	1
Calf_MAG_10946	95.91	9.4	0	2409883	3801759	40	20	3
Calf_MAG_21212	98.13	3.64	0	3752504	3801555	45	21	3
Calf_MAG_09736	99.8	2.04	0	14514	3801248	31	16	3
Calf_MAG_08683	93.59	2.67	0	63023	3800857	26	17	1
Calf_MAG_02107	82.75	3.64	0	193221	3800765	40	20	3
Calf_MAG_17896	99.41	0.1	0	211831	3800368	43	20	0
Calf_MAG_09421	94.06	3.45	0	28569	3799806	30	17	1
Calf_MAG_05279	79.75	3.04	0	3754	3799565	36	17	3
Calf_MAG_00311	99.99	2.06	0	2143036	3799460	33	20	1
Calf_MAG_07323	93.61	1.72	0	27975	3799196	32	18	3
Calf_MAG_07150	98.77	0.02	0	104421	3799114	38	19	2
Calf_MAG_07184	98.1	1.47	0	164859	3798881	33	17	2
Calf_MAG_09757	99.98	5.16	0	39854	3798596	35	17	1
Calf_MAG_21760	97.41	2.99	0	55914	3797589	40	19	1
Calf_MAG_07871	99.98	2.61	0	347748	3797503	37	19	1
Calf_MAG_07998	93.4	3.57	0	44424	3796672	34	19	2
Calf_MAG_10354	99.99	0.26	0	83274	3796243	39	20	2
Calf_MAG_04208	100	4.5	0	30246	3795886	30	19	2
Calf_MAG_10130	95.15	0.44	0	86548	3795805	24	15	3
Calf_MAG_21464	85.4	2	0	4812	3794759	19	12	1
Calf_MAG_08058	94.3	0	0	91091	3794042	38	20	2
Calf_MAG_03621	88.71	4.83	0	5593	3794022	19	11	3
Calf_MAG_00301	100	0.18	0	182698	3793098	29	20	0
Calf_MAG_10903	99.91	4.47	0	100175	3792888	35	19	3
Calf_MAG_18426	100	9.09	0	174137	3792351	34	19	0
Calf_MAG_10411	83.04	1.47	0	1002174	3791714	38	20	3
Calf_MAG_09607	89.79	7.11	0	1251971	3791365	39	20	3
Calf_MAG_04272	98.95	6.92	0	63761	3791286	29	15	1
Calf_MAG_10362	99.75	2.57	0	201408	3791191	37	16	2
Calf_MAG_02353	99.89	5.93	0	106866	3790043	35	20	2
Calf_MAG_07959	99.89	7.99	0	44897	3789794	34	19	2
Calf_MAG_05796	96.08	3.45	0	20828	3789761	37	18	1
Calf_MAG_08615	66.49	9.95	0	18226	3789157	22	14	2
Calf_MAG_05270	99.95	7.22	0	45424	3788728	40	19	3
Calf_MAG_08043	99.98	0.83	0	72705	3788188	41	21	3
Calf_MAG_04249	100	9.41	0	56809	3787414	28	18	3
Calf_MAG_11751	95.77	1.44	0	56544	3787201	38	19	2
Calf_MAG_05263	99.95	2.21	0	349880	3787120	42	18	3
Calf_MAG_09026	65.27	2.64	0	10815	3786871	27	17	0
Calf_MAG_10383	99.82	2.57	0	101731	3785874	37	18	2
Calf_MAG_02642	99.91	0.54	0	995769	3785098	38	20	3
Calf_MAG_08907	91.49	0.18	0	54201	3785049	34	19	1
Calf_MAG_10899	97.08	4.03	0	70307	3784994	36	18	1
Calf_MAG_08848	85.21	2.01	0	24017	3784901	25	17	1
Calf_MAG_06682	99.99	3.83	0	487555	3784326	40	19	3
Calf_MAG_10151	99.64	0.6	0	152110	3784135	36	19	2
Calf_MAG_07257	95.73	0.26	0	78400	3782784	36	19	1
Calf_MAG_12576	98.54	6.95	0	21400	3782618	24	15	0
Calf_MAG_08749	99.87	0.12	0	18389	3782371	33	18	0
Calf_MAG_16407	55.04	8.26	0	2235	3781690	14	10	3
Calf_MAG_17895	99.36	0.09	0	279670	3781577	45	21	0
Calf_MAG_13577	99.99	0.69	0	545418	3781426	37	20	2
Calf_MAG_14079	100	8.16	0	53186	3781175	34	18	1
Calf_MAG_10381	99.72	0.11	0	102559	3780712	40	19	2
Calf_MAG_10269	91.62	0.03	0	148949	3780654	36	18	3
Calf_MAG_15404	99.83	0.22	0	2821667	3780592	41	20	3
Calf_MAG_10419	86.5	8.38	0	199719	3780473	44	20	3
Calf_MAG_08688	99.93	0	0	98099	3779735	34	19	2
Calf_MAG_07953	82.25	4.41	0	4940	3778858	28	19	2
Calf_MAG_05554	97.13	1.44	0	228150	3777499	33	18	2
Calf_MAG_05552	99.06	0.85	0	145753	3776981	35	19	2
Calf_MAG_20160	85.01	9.28	0	68949	3776403	37	18	0
Calf_MAG_09428	97.37	0.33	0	35153	3776395	32	18	2
Calf_MAG_08068	94.61	0.69	0	80511	3775943	38	20	1
Calf_MAG_08927	86.38	0.24	0	40641	3775636	33	19	3
Calf_MAG_15415	99.2	7.29	0	33594	3775199	36	18	0
Calf_MAG_10257	99.96	8.09	0	213682	3774529	36	19	3
Calf_MAG_08348	94.18	0.68	0	60862	3774392	36	19	1
Calf_MAG_21441	85.96	2.06	0	5891	3773461	23	14	0
Calf_MAG_09726	99.8	3.56	0	39382	3772220	38	21	3
Calf_MAG_15161	93.05	6.28	0	7484	3771114	12	10	2
Calf_MAG_09418	85.76	2.02	0	8286	3770587	22	15	0
Calf_MAG_20789	99.16	3.76	0	15504	3769415	37	18	0
Calf_MAG_13934	99.99	0.75	0	3728285	3768525	38	21	3
Calf_MAG_10915	95.34	1.7	0	100305	3768427	38	17	2
Calf_MAG_09600	94	5.32	0	21489	3768078	31	16	1
Calf_MAG_02486	100	2.3	0	16404	3768050	27	19	3
Calf_MAG_00252	100	0.65	0	196555	3767629	33	20	1
Calf_MAG_07222	85.92	3.59	0	8310	3767207	33	19	2
Calf_MAG_11765	90.82	2.45	0	115667	3766334	40	20	1
Calf_MAG_07240	99.85	0.21	0	62654	3766057	35	18	0
Calf_MAG_21677	82.38	4.25	0	9226	3765716	21	16	0
Calf_MAG_21550	85.66	2.43	0	10036	3764693	25	15	2
Calf_MAG_02507	77.87	7.94	0	9246	3764224	16	14	2
Calf_MAG_13046	97.76	2.66	0	21319	3764185	26	15	1
Calf_MAG_08122	99.13	1.89	0	41054	3763370	25	16	0
Calf_MAG_07305	88.18	0.11	0	80075	3763122	33	18	0
Calf_MAG_08670	95.55	2.38	0	59731	3762925	34	19	1
Calf_MAG_12951	100	4.43	0	2616326	3758969	35	20	3
Calf_MAG_08970	57.14	2.3	0	80728	3758727	26	17	2
Calf_MAG_00273	99.99	0.18	0	275538	3758024	33	20	0
Calf_MAG_00292	99.99	0.16	0	171950	3757470	35	21	3
Calf_MAG_21635	86.02	1.82	0	6234	3757294	23	15	1
Calf_MAG_07147	95.34	1.17	0	82383	3756654	40	20	3
Calf_MAG_03675	83.27	3.78	0	10214	3754205	28	19	2
Calf_MAG_00302	99.99	0.17	0	331541	3753773	33	20	1
Calf_MAG_07321	90.84	1.63	0	24859	3753463	38	19	1
Calf_MAG_11766	88.22	4.76	0	6009	3753353	28	17	0
Calf_MAG_21245	98.52	4.91	1	3752504	3752504	45	21	3
Calf_MAG_10315	100	0.76	0	123422	3751669	38	19	0
Calf_MAG_19080	70.2	3.63	0	3819	3751607	20	13	2
Calf_MAG_21231	96.75	4.13	0	2088743	3750661	43	20	3
Calf_MAG_07134	99.65	0.53	0	98825	3750491	38	19	2
Calf_MAG_21213	98.01	3.58	0	3750467	3750467	45	21	3
Calf_MAG_09755	99.21	3.88	0	24706	3750288	32	20	3
Calf_MAG_10203	99.94	0.49	0	168505	3750088	38	18	2
Calf_MAG_08977	71.21	7.96	0	10880	3749801	15	12	3
Calf_MAG_07130	91.15	0.12	0	121377	3749571	38	19	2
Calf_MAG_07205	99.6	0.02	0	104413	3749373	38	19	2
Calf_MAG_08589	90.53	0.13	0	23593	3748008	28	17	2
Calf_MAG_10637	99.29	1.73	1	3747633	3747633	39	20	3
Calf_MAG_13918	99.99	0.63	0	3740112	3746738	38	21	3
Calf_MAG_10758	95.76	3.35	0	41084	3746414	40	19	2
Calf_MAG_04206	95.72	5.54	0	22165	3745777	35	19	1
Calf_MAG_10331	99.99	0.46	0	161886	3745496	40	19	3
Calf_MAG_10653	99.97	7.88	0	85566	3745364	38	19	2
Calf_MAG_10127	98.84	5.18	0	1301590	3745066	42	20	3
Calf_MAG_10214	99.96	0.42	0	116376	3744318	38	18	0
Calf_MAG_05834	94.65	3.24	0	21207	3743777	36	18	1
Calf_MAG_08018	99.31	4.58	0	75301	3743469	40	20	2
Calf_MAG_05256	99.84	1.51	0	118857	3743139	43	19	2
Calf_MAG_21225	98.01	3.49	0	639223	3743097	43	20	2
Calf_MAG_13720	84.12	0.77	0	206916	3742541	27	14	1
Calf_MAG_07303	90.76	4.21	0	6247	3742511	21	13	1
Calf_MAG_00285	96.13	3.81	0	13136	3742385	31	19	3
Calf_MAG_10251	99.96	2.05	0	3338176	3741643	40	20	3
Calf_MAG_00267	99.99	0.21	0	189297	3741435	34	21	3
Calf_MAG_10617	98.24	0.79	0	2289982	3740895	40	20	3
Calf_MAG_08799	96.65	2.05	0	155093	3740806	35	19	2
Calf_MAG_08746	76.19	8.19	0	39459	3740747	20	15	3
Calf_MAG_00249	99.99	0.21	0	196176	3740686	33	20	1
Calf_MAG_05248	96.44	6.21	0	64922	3740465	31	18	3
Calf_MAG_08230	92.55	3.82	0	51292	3740381	26	17	1
Calf_MAG_21672	81.65	5.44	0	3736	3740233	14	11	2
Calf_MAG_13543	96.18	3.66	0	38014	3740118	27	17	2
Calf_MAG_13961	99.12	2.05	1	3740112	3740112	38	21	3
Calf_MAG_18467	90.99	9.7	0	31718	3739943	29	17	0
Calf_MAG_05257	99.85	1.52	0	103564	3739761	43	19	2
Calf_MAG_10810	99.9	0.15	0	55203	3739484	36	18	3
Calf_MAG_10928	99.19	4.41	0	89299	3739089	39	18	1
Calf_MAG_00241	99.99	0.21	0	196892	3738945	33	20	1
Calf_MAG_10160	92.37	0.24	0	2133151	3738618	42	20	3
Calf_MAG_21590	83.52	3.11	0	5847	3738447	22	14	1
Calf_MAG_08913	88.11	0.28	0	30498	3737950	33	19	2
Calf_MAG_00313	99.99	1.21	0	161352	3737311	33	20	0
Calf_MAG_05808	97.97	5.15	0	12360	3737300	37	19	3
Calf_MAG_08580	78.73	1.38	0	34460	3737269	23	16	2
Calf_MAG_13593	99.71	9.32	0	26666	3736634	24	16	1
Calf_MAG_00231	99.98	0.32	0	183592	3736568	32	19	1
Calf_MAG_08444	77.87	6.88	0	98677	3736036	26	16	3
Calf_MAG_02403	55.98	9.39	0	3548	3735645	12	12	0
Calf_MAG_00312	99.99	0.17	0	184239	3735200	33	20	1
Calf_MAG_10423	99.55	0.02	0	92607	3735100	39	21	3
Calf_MAG_07236	99.75	0.01	0	65288	3734773	37	19	1
Calf_MAG_19837	97.96	3.41	0	1285226	3734569	45	20	3
Calf_MAG_22180	94.77	9.42	0	14230	3734434	38	19	3
Calf_MAG_21697	100	5.37	0	35227	3732979	39	19	2
Calf_MAG_13133	100	1.29	0	86893	3732705	36	18	0
Calf_MAG_00300	99.99	0.22	0	196633	3732489	33	20	0
Calf_MAG_10393	99.67	0.04	0	102584	3732363	38	18	1
Calf_MAG_14083	96.95	9.97	0	51202	3731863	25	16	0
Calf_MAG_02651	99.91	0.3	0	606569	3731772	38	20	3
Calf_MAG_13072	100	6.43	0	35729	3731537	30	17	2
Calf_MAG_20797	98.58	3.2	0	21192	3731377	39	20	0
Calf_MAG_08825	84.5	0.79	0	52317	3730540	30	17	1
Calf_MAG_08859	86.64	3.42	0	12798	3730163	32	19	2
Calf_MAG_19171	99.98	3.85	0	88747	3730162	34	17	3
Calf_MAG_10138	99.79	2.79	0	3620980	3729482	42	20	3
Calf_MAG_10654	99.63	8.94	0	38387	3728690	36	19	2
Calf_MAG_10107	99.99	3.15	0	60378	3728465	39	22	3
Calf_MAG_20957	81.52	9.48	0	8032	3727709	28	16	1
Calf_MAG_13933	99.99	0.62	0	3634322	3727390	38	21	3
Calf_MAG_10196	97.66	0.79	0	193816	3727006	37	18	1
Calf_MAG_10492	96.57	8.4	0	64014	3726796	36	19	3
Calf_MAG_08469	79.59	2.15	0	15699	3726730	31	18	1
Calf_MAG_10914	98.66	1.86	0	89299	3725730	38	19	2
Calf_MAG_10830	99.26	3.72	0	35720	3725604	35	18	2
Calf_MAG_07155	91.62	0.09	0	51678	3725491	39	19	2
Calf_MAG_12974	100	5.72	0	949207	3724111	35	20	2
Calf_MAG_09046	99.84	0.51	0	51643	3723377	37	19	3
Calf_MAG_15364	99.64	4.22	0	60446	3722047	34	17	2
Calf_MAG_07366	83.34	1.25	0	4649	3721312	19	15	2
Calf_MAG_13051	100	7.3	0	52286	3721301	34	17	2
Calf_MAG_06109	81.3	7.97	0	82296	3721290	40	20	3
Calf_MAG_13594	99.99	4.13	0	46765	3720744	37	20	1
Calf_MAG_21439	80.87	1.16	0	13088	3720567	31	18	1
Calf_MAG_21591	83.25	4.08	0	5044	3720410	17	14	0
Calf_MAG_16088	100	0.04	0	81372	3720306	38	19	1
Calf_MAG_16215	100	0.04	0	155224	3719980	39	19	0
Calf_MAG_08334	96.28	2.24	0	61530	3719939	37	19	2
Calf_MAG_07769	99.99	0.6	0	3190860	3719551	40	20	3
Calf_MAG_06647	99.99	3.22	0	55811	3719393	38	19	1
Calf_MAG_15412	95.08	3.21	0	433042	3719013	40	20	3
Calf_MAG_07262	86.24	0.22	0	134990	3718338	38	19	1
Calf_MAG_10898	99.81	1.59	0	68893	3718018	38	18	2
Calf_MAG_02722	99.21	0.66	0	103311	3717924	29	18	0
Calf_MAG_13557	99.97	5.09	0	261364	3717858	37	19	2
Calf_MAG_10636	99.29	1.37	1	3717262	3717262	39	20	3
Calf_MAG_15162	95.73	5.74	0	9139	3714840	23	14	2
Calf_MAG_21440	84.41	1.17	0	15338	3714393	28	17	0
Calf_MAG_09412	99.84	0.44	0	35154	3714001	35	19	2
Calf_MAG_07189	99.83	0.05	0	72294	3713875	39	19	2
Calf_MAG_10635	99.29	1.37	1	3713679	3713679	39	20	3
Calf_MAG_08695	90.63	7.58	0	78529	3712760	34	19	2
Calf_MAG_14074	87.07	9.94	0	27980	3712470	27	14	2
Calf_MAG_19721	96.24	3.12	0	48462	3712285	41	20	3
Calf_MAG_10313	95.1	0.77	0	388817	3711562	37	18	1
Calf_MAG_10397	99.65	0.06	0	101660	3711047	37	17	1
Calf_MAG_10365	99.49	0.03	0	101731	3710678	36	17	2
Calf_MAG_00247	99.85	0.24	0	91270	3710454	34	21	3
Calf_MAG_12447	99.93	4.88	0	16284	3710295	30	16	0
Calf_MAG_02375	99.93	4.92	0	98844	3709945	19	14	2
Calf_MAG_02466	100	0.83	0	23415	3709478	28	19	3
Calf_MAG_16312	54.51	0.89	0	4161	3709266	27	17	0
Calf_MAG_09075	95.13	1.67	0	27221	3708629	31	17	1
Calf_MAG_02373	99.77	4.6	0	106062	3707780	28	17	2
Calf_MAG_08013	91.53	4.95	0	51296	3707537	36	19	3
Calf_MAG_09390	84.7	4.97	0	26483	3707295	34	20	3
Calf_MAG_08136	95.08	2.04	0	33451	3707271	36	19	1
Calf_MAG_10871	93.42	0.49	0	448379	3706727	42	20	3
Calf_MAG_10773	99.93	0.39	0	951919	3705834	42	20	3
Calf_MAG_02363	99.77	4.35	0	108250	3705482	31	19	2
Calf_MAG_09059	99.45	0.41	0	47172	3703415	36	19	2
Calf_MAG_02509	98.78	0.52	0	95710	3702614	26	18	3
Calf_MAG_07177	92.97	0.04	0	110844	3702584	37	18	3
Calf_MAG_05291	78.65	3.31	0	488599	3700855	31	19	3
Calf_MAG_10426	82.17	0.35	0	2564247	3700752	37	20	3
Calf_MAG_19634	95.02	5.26	0	460662	3699691	44	20	3
Calf_MAG_05013	92.79	4.43	0	53406	3699512	32	18	2
Calf_MAG_10314	99.99	0.51	0	124293	3699292	38	18	3
Calf_MAG_14644	82.54	0.22	0	3744	3699195	31	17	1
Calf_MAG_00234	98.37	0.42	0	49741	3699098	32	20	1
Calf_MAG_07178	91.49	8.29	0	6989	3698498	28	17	2
Calf_MAG_10301	96.34	1.55	0	15677	3698341	38	18	0
Calf_MAG_08804	87.63	1.2	0	104271	3697399	29	16	3
Calf_MAG_07182	99.83	0.02	0	85197	3697356	34	19	1
Calf_MAG_19776	92.35	3.66	0	827760	3696672	43	20	3
Calf_MAG_09019	50.85	8.16	0	13896	3695315	17	11	0
Calf_MAG_02404	97.13	1.57	0	109642	3695122	33	20	3
Calf_MAG_19851	87.97	6.24	0	16610	3695012	36	18	1
Calf_MAG_07274	91.39	0.33	0	82114	3695005	36	19	1
Calf_MAG_02496	97.91	0.65	0	98063	3694540	28	18	2
Calf_MAG_07280	84.62	0.77	0	15810	3694188	30	16	2
Calf_MAG_08845	81.83	5.25	0	17365	3693723	27	18	3
Calf_MAG_04034	98.1	7.03	0	20884	3693141	24	13	3
Calf_MAG_17887	70.12	1.9	0	3036	3692673	18	13	1
Calf_MAG_13105	99.96	2.04	0	38700	3691992	24	14	2
Calf_MAG_10345	97.08	3.43	0	384814	3691972	37	19	3
Calf_MAG_13763	98.43	0.73	0	34562	3691837	32	16	0
Calf_MAG_09961	99.98	4.27	0	761782	3691234	39	20	3
Calf_MAG_10303	82.08	5.93	0	2071323	3691195	41	20	3
Calf_MAG_21682	91.82	0.6	0	16368	3690162	22	13	0
Calf_MAG_10150	88.69	0.22	0	403681	3689817	37	17	2
Calf_MAG_05029	100	6	0	3599075	3689782	44	21	3
Calf_MAG_10348	92.5	2.84	0	206118	3689481	37	20	2
Calf_MAG_08548	78.62	2.67	0	73100	3689376	29	19	3
Calf_MAG_13578	100	0.36	0	3385244	3689011	37	20	2
Calf_MAG_12059	96.93	8.73	0	23147	3688853	36	18	0
Calf_MAG_02366	100	4.64	0	98879	3688810	30	18	2
Calf_MAG_08073	98.27	0.02	0	91152	3688704	35	19	2
Calf_MAG_16633	96.45	4.07	0	583455	3688205	42	20	3
Calf_MAG_04942	99.67	4.62	0	16977	3688121	36	18	3
Calf_MAG_08651	96.31	0	0	27829	3687981	28	18	3
Calf_MAG_10184	99.99	2.28	0	107874	3687546	37	18	3
Calf_MAG_06315	89.08	4.54	0	13753	3687482	25	15	1
Calf_MAG_13559	99.99	4.15	0	297364	3687183	38	21	3
Calf_MAG_07800	99.99	8.28	0	86880	3686447	37	19	3
Calf_MAG_10399	99.14	0.02	0	101756	3685932	38	18	1
Calf_MAG_09680	90.89	4.58	0	20232	3685714	31	18	3
Calf_MAG_15377	98.07	0.69	0	49119	3685607	36	18	2
Calf_MAG_09945	99.97	1.88	0	19412	3685211	34	20	2
Calf_MAG_02514	78.98	8.45	0	5861	3685131	18	14	3
Calf_MAG_05267	95.52	1.67	0	170007	3684179	40	19	3
Calf_MAG_13521	99.13	6.11	0	40275	3684125	20	15	2
Calf_MAG_08083	82.44	9.4	0	56478	3683053	27	18	2
Calf_MAG_02662	96.85	1.15	0	832016	3682801	34	19	3
Calf_MAG_10612	99.87	0.32	0	105477	3682657	38	18	2
Calf_MAG_08883	85.95	3.11	0	11816	3682510	32	18	1
Calf_MAG_08337	94.45	6.63	0	60856	3682072	36	19	2
Calf_MAG_17742	99.99	0.2	0	118890	3681487	25	16	2
Calf_MAG_02393	98.6	4.61	0	86505	3680846	26	16	0
Calf_MAG_08613	88.47	1.58	0	18413	3680798	21	14	3
Calf_MAG_08667	92.56	2.55	0	29214	3680738	29	17	1
Calf_MAG_08464	80.08	0.05	0	16615	3680664	29	19	1
Calf_MAG_12784	99.03	5.38	0	696374	3680565	38	20	3
Calf_MAG_10807	99.5	2.09	0	64986	3679538	37	18	3
Calf_MAG_10153	88.82	3.29	0	2738969	3678761	41	20	3
Calf_MAG_07210	96.45	2.38	0	49607	3678071	35	19	3
Calf_MAG_03569	86.58	2.58	0	7830	3677482	25	15	1
Calf_MAG_02356	100	4.41	0	109652	3677440	34	21	2
Calf_MAG_07133	99.17	0	0	52958	3675343	39	19	2
Calf_MAG_21585	84.96	3.11	0	5508	3675274	20	15	1
Calf_MAG_13069	98.74	8.6	0	26559	3675020	37	18	2
Calf_MAG_05646	95.42	5.36	0	80190	3674897	41	19	3
Calf_MAG_10400	99.97	0.15	0	121124	3673367	41	19	2
Calf_MAG_11671	100	4.2	0	38898	3672103	33	16	2
Calf_MAG_10366	97.52	0.02	0	103065	3671943	34	17	0
Calf_MAG_06379	97.28	0.53	0	86895	3670798	37	19	3
Calf_MAG_07049	89.37	0.03	0	54402	3670770	37	19	1
Calf_MAG_10777	98.42	2.32	0	50177	3670661	36	18	0
Calf_MAG_10351	99.81	0.59	0	348625	3670492	36	19	3
Calf_MAG_10902	99.39	1.24	0	87937	3670159	38	18	2
Calf_MAG_09666	89.02	9.43	0	185043	3669675	37	20	3
Calf_MAG_11757	87.02	5.95	0	5548	3669525	19	13	2
Calf_MAG_07180	99.88	0.22	0	121573	3669348	38	19	0
Calf_MAG_04838	91.21	0.86	0	754936	3669078	43	20	3
Calf_MAG_12945	99.99	8.09	0	40675	3668733	31	18	1
Calf_MAG_07145	86.74	2.71	0	11454	3667124	27	16	1
Calf_MAG_08679	98.86	6.05	0	48740	3666953	36	19	1
Calf_MAG_07229	99.68	1.04	0	49077	3666775	38	19	1
Calf_MAG_13232	93.72	5.77	0	34541	3665487	31	16	2
Calf_MAG_08966	63.16	2.67	0	84755	3665076	20	16	1
Calf_MAG_08861	82.09	7.08	0	11242	3665025	31	19	2
Calf_MAG_08701	89.16	1.1	0	486412	3664659	39	20	3
Calf_MAG_10582	96.3	0.9	0	16727	3664132	21	12	1
Calf_MAG_11752	92.54	1.97	0	50165	3663909	41	20	2
Calf_MAG_09055	91.27	0.3	0	77148	3663896	35	18	1
Calf_MAG_10524	99.92	1.32	0	49673	3662910	36	18	3
Calf_MAG_09681	99.93	3.01	0	43485	3662652	26	19	3
Calf_MAG_15149	79.25	9.34	0	2173	3662240	16	10	0
Calf_MAG_07163	92.88	0.06	0	63927	3661950	36	19	3
Calf_MAG_04280	95.06	2.5	0	68700	3661911	31	18	2
Calf_MAG_08875	70.9	7.71	0	24667	3661756	24	15	3
Calf_MAG_16083	99.99	0.5	0	71278	3661657	33	18	0
Calf_MAG_10288	99.97	0.6	0	3573195	3661557	42	20	3
Calf_MAG_08061	86.74	0.54	0	90020	3660859	37	18	2
Calf_MAG_09708	89.89	1.72	0	12967	3660834	32	19	1
Calf_MAG_04946	100	8.54	0	119413	3660702	42	20	3
Calf_MAG_07194	92.15	0.51	0	36841	3659694	38	20	1
Calf_MAG_08739	88.53	2.35	0	54347	3659189	26	15	0
Calf_MAG_10209	88.02	3.48	0	81006	3658714	27	15	1
Calf_MAG_10333	87.94	6.68	0	214858	3658626	37	18	2
[truncated: 20,322 more rows]
